# Supplementary material for: Genome-Wide Association Study Reveals the Genetic Basis of Five Quality Traits in Chinese Wheat
Source: Front Plant Sci. 2022 Mar 3;13:835306. doi: 10.3389/fpls.2022.835306 (PMC8928432; doi:10.3389/fpls.2022.835306)
Supplement: Supplementary Table 1 — Phenotypic datas of five quality traits in 253 accessions for three environments and BLUP values. [file Table_1.XLSX]

## Sheet: Sheet1
Table S1 Phenotypic datas of the five quality traits in 253 accessions for three environments and BLUP values.
Accession ID	HJHQ					LH					WLTQQ					BLUP
	PC	GC	BV	SV	HA	PC	GC	BV	SV	HA	PC	GC	BV	SV	HA	PC	GC	BV	SV	HA
A11P6	16.5965	40.3425	394.423	41.916	68.74	18.3125	48.0215	425.405	44.6495	68.669	19.6785	51.526	503.834	61.753	70.5473	17.7449	45.0859	426.687	47.0255	68.9553
Xinmai9	16.8125	41.617	382.302	29.898	67.513	17.813	46.1863	410.751	33.643	67.6485	16.6415	41.0095	410.227	40.127	68.3717	16.9339	42.5062	397.359	35.8496	67.8197
Xiaheyinbai	16.915	38.8885	393.796	31.589	70.473	18.447	49.8505	434.512	50.8245	69.0437	17.3785	45.4755	431.435	50.733	68.7805	17.2938	43.7309	411.667	43.2134	69.0294
Fk(Fa）A309	15.628	37.22	353.434	32.5615	66.5515	16.437	39.805	332.483	28.208	65.394	16.4785	42.3195	402.62	46.1775	68.4113	16.2798	40.1807	369.437	36.6305	67.0745
Kechengmai7	16.2715	39.912	367.668	21.8445	66.3785	16.3395	39.579	349.223	22.937	65.901	16.4983	38.4115	365.73	31.322	67.418	16.4053	39.8365	368.042	28.8576	66.8677
D101	16.8235	42.4	418.288	47.6345	68.421	16.542	42.5417	379.013	34.9717	66.5225	15.914	39.4315	378.253	44.365	68.6035	16.4485	41.399	390.754	42.3382	67.8244
A128Nannong9918	16.903	42.532	405.44	40.6935	67.896	17.4605	41.107	384.985	35.974	68.764	18.8735	48.7615	475.211	51.3205	70.02	17.4151	43.2978	412.5	41.9173	68.595
Zhongmai133	16.104	40.5325	364.216	35.166	66.555	16.6415	41.8437	379.424	34.88	66.889	16.197	40.509	362.948	36.6255	66.8407	16.3662	41.0375	373.832	36.5613	66.9885
Lian75006	16.161	39.514	391.898	43.6163	67.171	15.574	38.6705	352.243	28.47	66.893	16.3035	40.616	399.866	44.365	69.5635	16.1463	40.0506	382.856	38.8617	67.8442
75	16.0477	39.156	365.719	37.402	67.0243	16.2525	40.017	362.313	26.778	66.1803	15.7675	37.178	401.363	37.275	68.6367	16.1488	39.4726	376.897	35.2233	67.3899
Chuanmai93	17.3327	42.781	410.443	39.409	67.556	16.563	41.5577	363.459	32.175	66.3523	16.053	39.848	377.678	44.365	67.849	16.6395	41.3373	384.788	38.6515	67.3733
Heng10-5218	16.4485	41.361	419.473	47.6017	68.815	15.615	40.276	339.391	34.149	65.815	16.6265	43.4305	409.32	44.365	67.6465	16.2832	41.5203	388.83	42.1147	67.5199
Ke0901	15.665	40.2733	381.708	40.2263	66.676	16.1983	41.3103	365.122	34.8273	66.483	16.696	40.772	399.601	42.7795	68.401	16.2526	40.9017	383.413	39.3765	67.2966
009-2	16.467	39.827	405.802	44.379	67.4997	15.278	37.487	343.336	37.943	66.5813	16.905	41.9895	401.363	50.682	69.7293	16.3016	40.1743	383.904	43.1727	67.895
Zhengmai113	16.972	41.4335	417.265	45.6105	68.338	16.3325	43.7905	361.601	35.0185	66.7447	17.2425	43.0375	420.883	47.929	69.142	16.7665	42.3096	396.516	42.0605	68.0013
Chuanfu9	16.7697	40.7473	395.558	38.713	69.278	17.3475	44.8945	419.385	38.285	67.604	17.209	41.2305	433.438	50.912	70.6497	16.9419	41.9651	408.357	41.9403	68.8691
2017-85 |Chuanmaizhongzu 125	17.212	39.278	417.782	48.827	70.2607	17.511	43.811	425.638	44.775	69.459	17.269	40.9365	423.586	57.2015	71.5497	17.1151	41.2709	412.85	47.6802	69.7903
D153	17.057	41.501	426.98	41.8985	69.3465	18.223	45.9645	465.189	54.316	70.9475	17.032	44.601	446.591	44.365	68.1195	17.1845	43.218	430.249	46.9172	69.0213
62	16.5987	41.439	397.567	35.806	68.1863	16.1467	41.154	367.644	30.3785	66.457	16.1745	39.5015	393.106	37.5675	68.0637	16.3664	40.8373	386.428	35.8278	67.6276
567	16.393	40.409	415.18	44.452	68.427	16.305	40.6405	365.436	32.458	66.966	15.936	38.526	401.363	47.726	69.5525	16.2908	40.2359	393.822	41.094	68.1684
D265	16.829	41.5435	424.516	52.91	68.72	16.398	42.8743	364.861	38.8797	67.3467	17.383	44.4165	440.048	52.96	70.8977	16.7734	42.4507	403.741	46.1208	68.7119
D157	17.0123	43.1617	412.144	40.132	68.444	16.617	41.7185	366.915	32.186	66.6247	16.4785	42.5235	401.363	45.93	67.837	16.6676	42.1338	393.423	39.47	67.6801
D161	16.6037	41.5245	393.707	44.5135	67.4955	17.32	44.0547	385.23	38.2873	67.475	16.626	42.2465	397.174	48.8665	68.107	16.7532	42.2359	390.896	42.8607	67.7331
D164	17.1217	42.7163	408.663	46.352	68.267	16.7895	43.546	433.787	33.1037	67.102	18.1395	46.363	447.883	54.0705	68.8613	17.1255	43.3495	418.572	44.5684	68.0077
D256	16.2357	39.7497	379.432	36.558	67.0217	17.156	43.244	399.241	37.9545	67.7703	16.4245	39.6255	392.722	45.5685	68.972	16.5669	40.95	389.612	39.9306	67.8831
Ximai2	16.1887	40.132	390.276	35.5235	67.6053	16.361	41.152	375.042	36.937	67.145	16.5097	38.6425	371.944	45.5603	67.9873	16.3868	40.3197	381.494	39.4269	67.6198
D268	17.6067	45.516	429.734	43.7353	68.5203	17.198	43.8873	401.101	33.539	68.104	17.338	43.456	411.769	43.558	68.5397	17.1655	43.4126	406.95	40.1253	68.2151
Sm-14	16.2867	38.9853	400.258	49.699	68.035	16.497	41.179	348.964	37.892	67.262	16.471	40.906	413.371	50.537	68.3953	16.4368	40.573	387.469	44.4651	67.8647
Shenmai1	16.637	41.0713	391.706	36.612	67.697	17.4275	42.584	419.164	44.3275	69.3715	17.1155	43.8287	419.441	46.7775	69.1033	16.9025	42.1392	403.957	41.8492	68.4723
Ji5265	16.5473	40.0717	396.592	39.708	67.609	16.9915	42.44	384.699	37.0055	67.6483	16.79	41.1155	413.37	49.6265	69.526	16.6991	41.1921	395.277	41.5032	68.1756
22	15.7483	38.6723	380.618	35.8027	66.6407	16.08	39.696	372.994	35.34	67.2707	16.5935	40.779	404.301	43.345	68.8207	16.2208	40.1165	386.273	38.481	67.6183
68	16.032	38.535	366.811	33.698	67.7497	16.528	40.732	369.966	24.703	66.2767	15.629	40.368	383.58	44.5435	66.3285	16.1768	40.2501	377.185	35.6249	67.0617
93	16.4613	38.594	377.608	33.289	67.6537	16.5213	40.4643	346.927	30.1927	67.1203	16.0845	39.0265	372.002	33.7275	66.722	16.4084	39.8871	371.385	34.2084	67.3502
82	16.8313	39.313	419.209	42.4635	69.5955	17.348	43.753	379.98	33.1037	67.1405	16.7105	40.671	408.65	43.0865	68.718	16.8647	41.2721	398.486	39.5775	68.2935
Keshan14-103	18.0423	41.4065	435.775	51.3067	71.1043	16.419	42.529	394.526	33.1037	68.5753	17.5557	40.3685	401.363	55.286	70.8285	17.1622	41.3648	409.928	46.6786	69.5866
564	15.942	38.7325	368.652	28.4855	66.7775	16.0765	39.7795	364.18	33.1037	67.068	17.447	44.0503	405.525	40.594	68.3517	16.504	40.9997	379.881	34.0504	67.5046
Keshan14-446	18.149	42.455	435.095	46.4005	71.063	17.063	42.853	410.761	41.789	69.836	18.0925	44.3265	465.711	59.321	72.842	17.4316	42.6374	423.777	46.8225	70.4352
Longmai15-5049	18.591	45.804	464.398	50.4445	71.7057	17.958	45.0757	453.941	51.795	71.1767	19.0673	46.7107	401.363	67.7405	73.9475	18.0534	44.5761	438.149	52.4682	71.1453
Keshan14-1016	17.0263	41.497	395.87	38.3945	68.5337	16.774	41.3047	373.731	35.519	68.4127	16.1745	38.421	376.863	38.391	68.117	16.6437	40.6379	383.542	37.9767	68.2451
Keshan14-722	16.7427	40.8715	386.322	34.408	69.3267	15.987	38.9717	356.747	34.477	67.5713	18.38	45.697	463.899	43.731	69.0493	16.8617	41.6072	398.274	38.0549	68.4432
Keshan14-1019	16.6847	39.737	385.645	37.8455	68.7867	17.701	43.8145	364.18	38.292	68.107	16.095	37.1365	372.733	39.92	69	16.74	40.5015	374.796	38.9196	68.4101
Longmai14H4062	17.5407	42.709	420.768	43.8565	70.011	17.493	44.155	364.18	49.706	68.2515	17.101	47.1305	401.363	56.3515	71.2455	17.1777	43.6835	399.206	47.4264	69.3134
Keshan14-1072	16.691	39.1815	384.168	33.4195	68.6715	15.8015	38.1185	377.103	39.414	69.003	17.427	38.4885	425.291	56.069	72.049	16.6048	39.3318	393.305	42.2388	69.4516
D410	19.564	49.4365	517.867	45.703	72.321	17.151	44.939	429.899	35.8635	68.665	18.631	44.743	473.908	51.214	72.844	17.9055	44.9017	450.552	43.1214	70.3957
Yunnanmai	15.822	38.336	374.447	31.3825	66.526	15.7055	39.2015	356.129	33.1037	66.4315	17.4043	43.9993	425.294	44.365	68.4143	16.3979	40.7584	385.832	34.6106	67.3133
Gang09-558	16.6133	39.3747	407.26	46.916	69.5085	15.75	38.9463	354.205	43.3777	67.081	19.0255	41.7225	402.555	55.606	70.569	16.9115	40.3109	387.947	46.4955	68.7306
Kenda16	16.4637	39.7867	387.277	45.633	68.726	17.441	43.568	419.798	50.435	67.658	15.896	36.9555	410.139	59.5535	69.6303	16.5718	40.4095	400.768	48.8605	68.4604
Longmai Long33	17.1145	41.6435	384.299	38.698	68.483	16.338	39.976	380.829	40.5285	67.569	16.821	38.8305	408.666	55.718	70.3927	16.6826	40.4325	390.027	43.7382	68.5708
96	16.2413	40.6533	393.9	39.3915	66.8374	15.6697	38.1447	368.666	23.2745	66.3747	15.926	37.845	393.767	38.598	68.2217	16.0908	39.5368	385.944	35.2026	67.3126
60	16.1707	40.3747	391.752	33.0603	67.2707	16.21	38.047	409.932	29.0125	67.0677	16.3765	42.1905	422.807	48.3005	67.733	16.3162	40.491	402.54	37.4301	67.4489
Kechun4	16.562	39.478	412.655	49.269	69.6645	15.1063	36.7873	358.305	30.5917	66.419	15.9315	39.5503	400.186	56.654	68.5545	16.0282	39.2994	389.449	43.9895	68.0536
Jiusan14-50661	16.2983	37.8627	398.414	32.5745	69.2765	16.8373	40.97	408.128	33.7545	69.1213	16.053	37.426	407.628	41.934	69.5483	16.4415	39.449	400.39	36.9612	68.9509
Longmai14-4762	17.1167	39.5677	412.478	46.6765	69.9047	17.1835	41.5763	420.067	40.6093	69.4107	16.52	40.018	414.204	53.553	69.5707	16.8361	40.6191	407.96	45.1653	69.1971
D185	16.3157	40.4325	385.467	43.626	67.192	16.6455	43.962	364.89	41.4885	67.3103	16.511	40.4705	406.486	44.639	67.306	16.489	41.5403	386.069	42.3609	67.3978
D137	15.8873	40.2237	361.406	38.053	66.2573	16.3365	41.3705	339.657	33.1037	66.702	17.2555	41.9575	425.344	33.869	67.9537	16.4745	41.1772	378.658	35.0043	67.1517
Chuanmai107	16.3483	40.7695	392.726	40.8475	68.4465	15.9797	41.172	361.671	32.4245	66.4133	14.7835	35.7265	328.978	33.6255	65.455	15.9417	39.7805	368.18	36.6181	67.0368
Wanmai19	15.591	38.6067	354.385	36.6985	66.4337	16.4825	40.6935	389.503	41.16	67.866	16.7925	41.6595	414.634	46.263	67.9185	16.3192	40.5401	386.477	40.9458	67.4929
H422	15.8753	36.723	370.908	42.5845	66.8635	16.6627	43.4303	359.016	25.3715	66.3247	16.2723	38.887	368.09	36.573	67.212	16.3272	40.1654	371.744	36.023	67.0352
6	16.4243	39.5065	389.885	27.497	69.3495	15.313	37.9185	309.976	25.7735	65.8997	15.8617	40.16	364.894	43.8845	66.2575	16.0411	39.7607	363.493	34.1702	67.2945
H451	16.0147	39.684	399.346	44.798	68.218	16.858	40.6255	391.205	32.6605	67.4387	17.1837	42.1285	429.225	38.3805	69.697	16.6308	40.9193	401.392	38.8647	68.3024
偃zhan4110	17.9275	45.507	436.207	44.5035	69.4187	16.482	42.148	374.393	33.634	67.609	17.6675	44.5865	401.363	51.355	69.0203	17.1318	43.2359	403.473	42.2953	68.469
Ningchun50	15.4207	37.37	352.46	38.7915	67.642	15.811	38.5815	342.555	39.6275	66.875	15.4545	38.9985	363.308	45.319	66.563	15.8005	39.1089	362.08	40.8494	67.237
Zhou26-1	17.1093	43.3905	448.526	51.181	69.0397	17.5353	43.7277	416.753	32.4707	67.7287	16.5485	41.515	405.029	44.9937	68.9043	16.9504	42.4191	413.999	42.0329	68.3727
Zhouyou102	15.9817	39.3947	382.303	41.2905	66.4237	16.4127	41.138	361.895	38.099	66.5857	16.149	39.991	384.732	44.365	67.881	16.2683	40.4612	379.271	41.2712	67.1394
Kpl-4	17.3797	44.5695	436.897	53.327	69.296	16.1763	40.5807	364.18	34.254	66.8607	17.4503	44.9883	418.888	49.3197	68.7777	16.8842	42.7493	406.146	44.1608	68.1833
D182	15.354	36.256	367.494	36.5747	66.436	14.827	36.621	305.089	26.471	65.9327	15.4247	38.5217	382.685	39.2657	66.3803	15.5348	38.255	361.393	35.4505	66.5965
Wo9703A315	16.8165	42.5915	390.25	43.6585	68.2985	15.8793	40.996	351.955	31.603	66.657	16.3767	44.9265	378.224	46.24	67.434	16.378	42.3699	377.202	40.2875	67.5066
Cl0401	16.5757	43.1175	400.711	38.815	68.36	15.927	39.4115	354.034	35.2795	66.6873	17.249	42.7157	414.06	49.15	68.1807	16.5659	41.6039	388.836	40.6893	67.7456
Liangxing99-1	16.5337	39.679	391.731	42.636	68.4477	16.103	40.008	354.581	30.0725	66.973	16.3903	40.165	415.346	46.877	68.519	16.3821	40.2847	387.123	39.8292	67.9282
Xinong501	16.299	40.4883	381.25	38.8745	67.355	16.098	41.646	347.422	29.973	65.9107	18.7345	46.796	472.622	55.618	71.321	16.8545	42.4249	396.892	40.9861	67.9828
37	16.6537	41.922	399.799	53.8327	68.2273	16.0103	40.6545	364.18	28.648	66.527	18.394	45.2195	445.874	41.074	68.4653	16.9139	42.1204	408.338	37.0001	67.6456
D36	16.3333	41.1313	391.39	43.5685	67.499	15.706	39.5295	347.008	33.1037	65.842	19.218	48.561	492.32	48.001	70.037	16.9092	42.5228	403.65	41.5975	67.732
Xinong889	16.6593	40.492	370.437	37.4793	67.9213	15.0213	37.7987	311.774	30.6863	64.9517	17.8325	44.295	370.841	39.5125	68.9665	16.4619	40.8932	360.485	36.8072	67.3475
Linxuan6109	16.726	41.591	406.59	50.444	68.582	16.203	39.423	364.18	33.1037	66.878	17.2965	43.9335	424.738	52.146	69.71	16.6687	41.5294	398.275	45.3237	68.238
Jimai06039	16.348	39.519	377.274	41.743	67.5873	15.3667	39.9355	344.383	29.9173	65.6553	16.401	40.899	381.576	46.6655	68.5393	16.1467	40.4147	372.967	39.4642	67.3746
B215-1-1	16.8107	40.7757	404.627	45.116	68.4413	16.5277	40.369	364.18	29.84	67.4063	16.5285	44.3925	389.02	38.965	67.9847	16.6024	41.6526	386.147	38.4332	67.9006
B215-1-7	16.3187	40.1427	408.942	51.493	68.462	15.9593	39.267	357.946	36.216	66.6243	16.3015	40.927	383.042	46.837	67.3095	16.2723	40.4222	384.385	43.565	67.5354
Hei176	15.873	37.328	378.542	39.3145	68.6375	15.6777	37.329	348.715	35.0443	66.8883	15.487	36.6415	374.212	49.008	69.465	15.8966	38.2598	372.571	40.7636	68.1877
M09-853	16.2277	40.2217	379.433	44.3835	68.1775	15.6425	38.4525	316.458	27.6755	65.1737	16.663	39.804	390.148	35.571	68.077	16.265	39.988	368.829	36.8021	67.2547
M09-843	15.778	36.9803	368.928	30.8845	67.799	14.9845	38.8053	368.71	26.615	66.395	15.732	39.067	358.573	41.722	68.2857	15.7689	39.0647	371.306	34.6894	67.5517
L661	15.3353	37.221	341.793	28.069	66.5203	16.741	41.2975	364.416	21.1307	67.556	15.5905	37.5065	352.761	31.225	66.676	16.0277	39.3582	362.238	29.9427	67.1012
Mianyang06-367	16.6537	41.922	399.799	53.8327	68.2273	15.971	40.06	344.766	25.9355	65.3683	15.6523	36.435	323.128	31.68	67.3685	16.0291	39.179	355.654	32.9374	66.872
D378	15.807	38.3855	386.52	37.8135	68.5025	16.6475	40.121	384.387	29.1015	68.2787	16.5085	40.3445	416.909	52.3493	69.6337	16.3502	40.0629	393.61	39.8041	68.5741
D254	16.0523	38.816	381.799	46.4185	67.706	15.584	38.3345	338.862	35.534	65.728	15.8715	41.067	383.962	44.365	68.3103	16.0062	39.9117	373.214	42.1312	67.359
D366	15.5407	37.486	376.446	41.4545	67.6815	16.826	41.8385	392.466	39.2247	67.6663	16.3805	41.0245	391.826	47.059	68.114	16.3135	40.3765	387.348	41.8928	67.8192
Ruixing1101	16.221	39.761	383.757	43.633	68.1685	17.0547	44.2737	390.955	43.5147	69.0623	16.418	43.0165	426.294	40.6035	67.959	16.5609	42.0583	397.02	41.9389	68.2607
Chuanmai604	17.435	45.2665	409.923	46.296	68.592	17.731	46.52	378.397	39.6547	68.314	17.2747	42.698	405.861	46.3115	68.2807	17.2409	43.8416	395.229	43.0224	68.242
Zhongyu885	16.307	39.209	375.957	41.114	67.237	17.518	45.006	394.357	38.6383	68.3947	17.3105	42.5505	443.183	51.765	69.1937	16.8796	41.9525	400.065	42.8269	68.1554
D145	16.5713	40.9567	425.478	46.7715	69.262	16.741	42.5533	363.824	37.0957	67.491	18.698	47.462	473.116	48.5027	70.655	17.0952	42.9195	411.775	43.0307	68.774
Gaoda1	16.6777	42.3917	427.383	52.593	69.3963	16.53	42.198	359.762	27.426	67.1177	17.655	44.3755	437.389	49.177	69.209	16.8232	42.4857	402.983	42.3076	68.3857
Dongmaike608	16.1963	39.551	391.53	47.622	68.275	16.014	40.6785	348.329	25.6025	66.4977	16.3157	40.5657	410.01	38.69	67.4917	16.255	40.5137	384.371	37.8787	67.4741
Xumai9169	15.4485	37.685	399.799	38.268	67.734	15.686	39.015	341.24	28.701	66.0107	15.1525	37.617	364.497	40.9835	66.8413	15.7211	38.9804	367.834	36.8832	67.0482
Zhoumengmai288	15.85	37.4055	367.364	38.177	66.71	15.4493	38.0763	358.226	24.123	66.0747	15.461	37.1855	372.306	34.9667	67.025	15.8247	38.5737	371.555	34.1583	66.8838
Btyc7-1-1	16.8647	42.65	398.634	44.5085	68.509	17.097	45.128	365.159	31.2855	67.6973	16.7315	42.109	397.476	40.7403	67.3725	16.8122	42.7064	387.146	39.0089	67.8608
Qinfeng18	16.059	39.5427	377.9	38.8175	67.649	16.0625	40.524	363.291	31.0935	66.6575	16.1205	40.242	407.161	44.822	67.8307	16.1902	40.4046	384.106	38.5868	67.4676
Mengmai032	16.0517	40.285	388.804	38.2037	67.47	16.4385	41.5075	370.148	32.2145	67.788	15.559	37.9805	362.332	44.5873	67.111	16.1446	40.283	377.41	38.6457	67.5347
Xiao偃58	15.5795	37.8945	359.257	37.85	67.2357	15.3127	37.4395	325.746	27.365	64.9657	15.4575	36.616	368.837	39.514	67.436	15.7217	38.4153	360.84	36.0378	66.8244
Zhengmai132	15.925	39.8155	341.888	33.52	65.143	15.051	37.8915	312.869	26.0765	66.0107	15.0025	36.755	318.453	28.442	65.3727	15.6532	38.9676	341.356	31.8796	66.072
Yunhan618	17.1613	44.8905	422.777	53.8327	68.2087	16.753	44.5445	367.941	34.0015	66.9947	16.2065	42.3307	411.07	47.9535	67.936	16.6735	43.1252	397.012	41.1052	67.7384
Yunhan602	17.18	44.8435	466.426	57.469	69.689	15.906	42.6835	367.611	36.6095	67.282	16.513	41.7205	451.27	53.6127	68.765	16.5326	42.545	417.348	46.8878	68.3549
Beijimai6	15.994	39.2563	373.684	34.2275	67.3507	15.4687	39.404	331.656	29.586	66.9523	15.862	41.2453	386.694	39.553	67.0043	15.9584	40.3159	370.071	35.734	67.2529
56487	16.5803	41.3847	402.92	43.3033	67.68	15.6955	39.993	334.902	36.331	66.333	16.504	42.89	411.406	43.0335	67.401	16.3376	41.3663	384.215	40.5908	67.2787
Yunchun1012	16.3027	41.034	417.049	48.459	68.4555	16.436	40.887	385.629	31.0603	67.7937	16.122	39.312	401.363	46.272	68.8187	16.3527	40.6316	400.923	41.3268	68.216
Xiao偃16	16.751	41.0573	407.428	38.4125	68.6115	15.382	38.4135	319.274	28.3527	66.4357	16.2905	39.8705	392.98	31.9455	67.02	16.2591	40.2056	377.02	34.5635	67.4498
M09-393	15.7447	37.8995	399.799	30.9415	67.694	15.272	38.915	317.396	29.04	65.0343	15.859	39.7215	383.138	39.5033	67.6337	15.8573	39.5102	366.159	34.7555	66.99
Xinong6151	16.2943	39.76	383.788	44.682	67.603	15.5615	38.53	326.264	27.713	65.971	16.213	40.29	393.661	47.816	67.878	16.1584	40.0035	373.159	39.9357	67.3126
Yimai1	16.288	40.7907	397.672	48.1665	67.799	16.937	43.704	384.478	43.592	67.724	15.3005	42.1765	363.324	43.7487	66.5513	16.2655	41.9187	383.3	43.7584	67.3966
Yunhan618	16.4683	39.3365	399.799	47.99	67.709	17.1293	44.382	399.362	41.394	69.15	16.369	40.323	445.845	56.489	69.6475	16.6205	41.3021	412.723	46.4643	68.613
Zhisheng998	17.7125	45.2495	448.587	49.3905	69.7225	16.61	41.842	370.266	35.0505	66.82	16.2893	40.663	403.322	37.7103	66.283	16.7505	42.1546	401.976	40.3757	67.6451
Hongyumai7	15.6107	37.8797	358.151	27.9035	66.2985	15.9435	39.379	337.062	21.9575	66.848	15.1335	36.7	341.081	35.0585	65.845	15.808	38.8859	356.634	31.0959	66.704
Fumai2	16.2957	41.7795	400.029	33.2925	67.605	17.445	43.042	406.1	33.439	69.0107	15.0855	36.627	349.973	31.186	65.9725	16.3365	40.6831	386.394	34.4171	67.6856
47	15.5077	37.364	360.784	37.6097	66.5757	15.6787	38.289	330.173	30.3927	66.6227	15.1235	37.472	401.363	39.0597	66.26	15.7185	38.6811	364.965	36.6308	66.8249
99	15.5697	35.7425	372.659	35.646	67.4285	16.087	38.115	353.345	35.275	67.9497	16.0315	39.082	393.059	36.8115	68.8187	16.0478	38.6516	376.87	36.8479	68.0264
2017-63 | Chuanmai 37	17.579	41.5863	439.138	52.506	69.8123	16.9547	40.6645	369.745	40.6475	68.854	16.3395	40.0985	404.932	46.5115	69.763	16.8739	40.9203	399.941	44.8512	69.0799
D223	17.554	44.9637	429.661	43.202	67.9387	17.7003	46.959	387.848	36.231	68.3263	17.4245	44.6315	447.235	46.879	68.4243	17.309	44.3555	412.319	41.508	68.1205
2017-47Jingai21	19.1545	47.4455	492.688	61.5555	71.9985	17.4997	43.742	364.18	33.1037	68.9763	18.6083	43.1805	466.023	68.786	72.4413	17.92	43.7675	439.274	54.734	70.2987
D99	15.7617	39.927	380.903	37.8815	66.8363	16.5023	44.032	364.18	35.608	67.0227	16.1677	40.319	366.308	37.4765	67.1693	16.2311	41.3335	371.201	37.6403	67.1813
A1276S139	17.2703	42.5797	430.849	46.461	68.278	16.719	44.27	350.832	39.55	67.4307	17.3237	43.8805	449.621	56.644	69.788	16.9619	42.9028	404.199	45.5941	68.3381
D97	16.437	39.51	399.799	43.454	68.042	16.8787	44.4295	383.549	37.0425	68.1907	16.6993	42.2445	429.854	51.87	68.4113	16.6327	41.8136	402.544	43.0174	68.1088
Fumai2	16.0767	39.0885	377.553	31.174	67.144	16.7527	42.3017	370.418	24.1735	67.767	16.2783	40.611	398.608	36.693	67.5977	16.4026	40.8387	383.57	32.851	67.5611
Chuanmai602	16.3553	40.7027	374.007	34.9967	67.1765	16.0307	40.472	331.052	28.1283	66.4597	15.374	37.9455	401.363	48.315	67.2197	16.0906	40.1473	369.443	37.6838	67.1438
Zhoumengmai287	15.1765	36.745	369.634	28.5925	65.3325	15.0895	37.421	326.98	27.4735	66.3727	15.202	37.495	401.363	36.4875	66.096	15.5175	38.3463	366.785	33.014	66.4048
A124Ciko	15.884	37.929	399.799	34.0745	67.5843	15.7035	38.8905	340.389	28.0845	67.0197	16.0655	39.045	376.042	40.1095	67.8913	16.0512	39.3499	371.275	35.455	67.5576
Wuhanmai	16.5817	39.523	391.922	28.5143	69.1043	15.9517	38.365	345.227	25.632	66.7337	16.245	40.249	401.363	31.889	68.821	16.3266	39.8609	379.705	31.3306	68.1127
A126Nannong9918	15.7797	38.0793	332.431	32.3355	66.7137	15.4475	38.889	309.784	28.302	65.2385	15.687	38.668	351.476	39.87	68.0477	15.8676	39.2828	346.343	35.011	66.9552
Zhoumai66	16.107	39.26	379.842	40.456	67.2063	15.5777	37.494	332.334	26.0425	66.3687	15.6635	39.3045	366.111	36.3605	67.8783	15.9718	39.3962	366.941	35.6034	67.2903
Ml2651	14.5115	35.7675	301.492	27.533	64.466	14.348	34.5425	294.202	23.102	64.734	14.388	35.5407	331.928	32.8867	66.062	14.9752	36.9271	330.107	30.7185	65.7733
Nannong037-57	16.4653	39.2835	422.327	50.621	68.7495	16.5647	42.2017	405.364	39.2077	67.653	17.035	42.7595	425.067	48.7775	70.3305	16.6361	41.3626	409.423	44.596	68.6005
Fumai18	16.291	40.0967	385.917	46.507	67.4375	16.059	38.277	340.256	34.282	66.1605	16.2217	40.4467	395.188	46.13	67.6293	16.2666	40.0668	377.429	41.6459	67.2448
Hongyumai2	15.9177	38.8065	366.852	25.91	67.2167	16.1563	40.467	369.195	21.905	66.6057	15.862	41.729	372.052	37.596	67.72	16.1191	40.5766	374.014	31.2194	67.3131
Zhengmai103	17.195	42.3325	432.917	44.734	68.862	17.2307	42.6445	388.616	35.724	68.463	17.103	43.1455	401.337	43.558	67.859	17.0114	42.2764	402.146	40.9108	68.2299
Chuanyu55871	15.8613	38.9093	379.757	45.8245	67.568	16.4995	40.3487	332.313	35.0267	66.776	16.4773	40.6273	394.412	45.83	67.4527	16.3236	40.2914	373.806	41.5827	67.3788
P023Shi6678	15.6993	38.0127	388.821	39.468	67.729	16.4863	42.811	368.572	27.0117	66.848	17.3703	45.3715	445.942	39.191	68.5123	16.5163	41.7563	397.389	36.2631	67.7177
H359	16.037	38.8255	384.774	38.94	67.0725	15.4077	38.373	347.412	30.4973	65.6597	16.6375	42.668	403.303	41.867	68.1817	16.1325	40.3054	380.741	37.7116	67.1637
鑫nong518	16.07	39.4587	391.173	37.2547	67.0737	16.7645	40.994	364.18	26.891	67.3955	18.479	48.191	467.032	52.678	68.5383	16.9125	42.3287	406.925	39.0766	67.6684
Ningchun55	16.349	39.8685	410.193	46.5083	68.1133	15.187	39.386	311.79	25.154	64.3835	15.717	39.578	363.885	42.59	67.188	15.9535	40.0426	368.787	38.5227	66.907
A258Shanqianmai2	17.499	43.474	415.797	39.396	68.724	16.9723	41.1245	380.237	29.6765	67.1153	17.1637	42.643	402.834	50.341	69.8415	17.0267	42.0706	396.379	39.7629	68.3294
H419	17.8505	45.3825	443.382	44.499	68.767	14.5505	37.7535	300.804	30.834	66.3673	16.952	42.8167	394.914	43.388	68.397	16.4798	41.7717	381.748	39.5793	67.7921
Dh6270	16.4643	40.411	399.799	34.512	67.9725	16.485	42.444	409.841	36.009	67.5333	16.2225	40.01	401.363	56.8395	68.841	16.4309	41.0212	408.738	41.7596	68.0436
A230Tianmin倭han	16.043	39.313	379.274	31.1	67.2713	16.6603	40.313	370.687	33.869	67.7097	16.564	38.9135	378.577	48.5945	68.5037	16.4574	39.9885	379.177	38.3133	67.8114
Guinong007	16.1227	39.182	384.309	39.6925	67.288	16.4047	42.8965	388.672	33.175	67.875	17.0217	44.375	439.142	44.398	68.4873	16.5145	41.878	399.25	39.2272	67.8523
D620	16.3993	39.3455	398.886	33.74	67.2837	17.1687	42.223	369.505	24.5355	67.468	17.33	43.7973	443.397	34.434	68.3463	16.8443	41.6521	399.447	33.0532	67.7122
Sm-10	15.7093	36.6533	369.469	28.386	67.289	15.4643	36.574	318.902	22.535	65.4003	15.641	37.324	360.817	34.6283	66.966	15.8324	38.0649	359.856	31.2403	66.8291
Bao3611	16.29	41.531	399.799	42.823	67.465	16.7523	41.9875	375.654	30.295	67.372	16.235	40.221	385.909	44.078	68.361	16.4581	41.23	385.802	39.2069	67.7379
Gan7050A323	16.8037	41.147	405.457	51.423	68.2417	17.1847	46.247	435.168	46.6735	68.4263	16.3105	40.749	400.797	50.443	68.6423	16.7239	42.2813	406.663	47.0811	68.2798
Anke1601	15.9323	38.103	376.5	41.33	67.0927	16.4743	42.171	358.015	30.646	66.356	16.309	38.5693	395.809	44.2675	67.9513	16.3078	40.0628	379.612	38.9664	67.2766
A303Zhengmai7698	16.251	40.4145	405.069	53.8327	68.6745	16.4443	40.0973	373.164	27.532	68.058	17.072	43.971	409.001	34.7385	68.053	16.5565	41.38	393.496	34.4996	68.1313
D255	16.3287	41.0955	381.673	39.897	67.6243	16.56	42.8413	356.223	33.8383	65.8573	17.3635	45.8995	410.994	47.0363	68.0213	16.6733	42.6849	384.218	40.1275	67.3031
24	17.2307	40.69	427.95	40.8435	68.7497	16.5843	41.1995	375.6	26.8725	67.1677	16.6183	42.488	393.343	39.4927	67.659	16.7388	41.3823	395.653	36.6767	67.835
2017-22 Chu0608	18.0465	44.005	448.086	54.378	69.3647	18.519	45.688	410.642	39.622	70.488	17.6213	45.344	414.845	40.432	67.852	17.6776	43.9272	414.491	43.5364	68.9624
2017-100 | Xinchun 233	16.638	39.2493	397.473	54.8895	68.5697	16.6303	42.751	380.455	44.6785	68.6733	17.134	43.0305	410.701	54.897	69.7807	16.7341	41.506	393.808	48.5856	68.7193
2017-69 |Chuanmai 44	17.1395	42.736	399.799	50.203	69.04	18.5485	48.7035	446.577	54.6085	70.8765	17.733	44.0743	432.425	61.4125	70.303	17.4653	44.0356	424.309	51.5245	69.4767
2017-18Anhui3	17.2607	43.2635	453.552	63.4135	70.4305	16.757	42.955	362.795	36.541	67.68	18.5225	46.744	472.175	59.9335	70.5777	17.2325	43.4197	418.131	49.9325	69.1007
2017-77 Chuanmai52	16.3705	38.974	399.799	53.8327	66.9515	15.7783	40.9615	379.931	47.584	67.3573	15.6933	38.8673	398.701	61.308	67.9687	16.0708	40.0237	391.363	50.23	67.5334
72	16.1823	38.1797	398.068	38.904	68.125	16.0807	40.0217	381.624	32.825	67.1527	17.307	46.511	438.221	42.1053	69.077	16.5198	41.3833	400.938	38.3509	68.0393
2017-76 | Xinchun 22	15.6587	35.7467	352.835	38.386	65.5267	17.9625	46.585	440.665	49.875	68.478	17.674	43.5243	444.428	55.3053	70.2163	16.9162	41.6633	405.088	45.7877	68.0003
571	16.517	40.7527	423.857	56.623	67.428	16.2223	40.267	349.45	25.94	66.5943	16.356	41.0435	369.342	35.91	67.53	16.3995	40.838	382.613	39.5265	67.3194
80	15.9037	38.6577	421.521	40.5083	67.8277	15.4027	37.8277	341.626	32.396	66.5643	15.65	37.8263	376.337	48.01	68.4175	15.8569	38.9328	381.772	40.114	67.6299
H79	16.714	41.0355	391.786	53.8327	66.728	16.139	39.736	351.179	31.5765	66.4277	15.9525	39.51	432.738	44.77	66.902	16.3301	40.4044	390.38	39.2231	66.977
581	16.6945	42.529	385.326	41.318	67.133	16.072	41.9017	349.779	38.9155	66.3783	17.4115	42.704	430.981	46.2953	68.549	16.6501	42.0406	388.319	41.5505	67.4677
13-9045	17.811	45.31	449.186	53.8327	68.5	17.2553	44.2565	382.333	40.9225	68.0513	16.833	41.785	414.684	49.306	68.2767	17.0848	43.0182	407.827	43.8816	68.1561
590	16.1823	37.8385	399.45	33.3605	67.811	16.369	41.3923	374.207	33.3193	67.1563	16.6177	40.508	370.528	35.684	67.8913	16.4181	40.2918	383.082	35.5219	67.6525
2017-25 | Dongmai 11	15.7045	36.6955	379.09	43.5997	67.392	17.1997	41.3175	382.563	34.59	70.0635	16.2123	40.273	397.047	35.9997	66.9743	16.43	39.928	386.521	38.413	67.9691
580	16.2625	39.253	405.728	39.168	68.2055	16.3967	41.4125	377.322	34.301	67.617	16.8357	41.397	415.834	46.5995	68.926	16.5092	40.834	396.409	39.9357	68.1412
40	16.4107	39.164	410.726	39.6337	67.396	16.1453	40.4467	367.914	27.504	66.966	16.6737	40.766	413.38	39.3357	68.5843	16.4335	40.4242	394.586	36.4815	67.6733
603	15.811	38.4633	377.813	43.84	67.138	16.305	41.0763	353.25	36.7325	67.3323	16.445	39.08	386.274	42.778	68.485	16.2639	40.0051	376.366	40.7521	67.6756
Longmai65	16.5155	40.461	393.972	36.164	67.221	19.266	50.5	472.317	51.8035	72.1665	19.2915	48.688	401.363	56.4727	72.9635	17.9213	45.1249	421.397	46.1078	69.9898
H117	16.4717	40.5103	396.397	42.106	67.8415	17.1307	45.411	381.691	34.1527	67.626	17.3153	46.1725	419.642	49.322	68.247	16.8617	43.1845	396.027	41.3053	67.8801
H235	16.5827	43.1355	389.149	39.2885	67.296	15.54	39.0173	328.64	27.1327	65.172	16.706	43.7675	410.454	38.604	68.672	16.323	41.6971	378.776	36.122	67.2628
H316	16.9367	42.5083	407.059	45.1665	67.974	16.007	40.2423	358.173	28.7265	66.399	16.6723	43.1275	393.871	44.081	67.9283	16.5315	41.7334	386.551	39.4012	67.5079
M7723	16.577	40.432	403.859	42.472	67.8903	16.6565	41.1483	359.894	32.821	65.998	16.742	41.8095	407.149	42.7095	67.8113	16.6172	41.143	389.41	39.4083	67.3535
H3015—S	16.1587	39.4503	380.187	37.044	67.288	16.2437	40.0703	381.813	37.2205	67.4013	16.6487	42.096	410.679	43.4667	68.9727	16.3882	40.6945	389.711	39.2944	67.8893
Bamai12	16.307	40.8935	385.324	37.529	66.679	16.097	42.177	336.936	33.0203	66.5073	16.744	43.273	397.933	42.16	67.6267	16.4128	41.8717	377.142	38.0923	67.1533
Bafeng5	15.898	38.202	399.799	36.49	67.306	16.2007	43.3425	359.208	37.871	66.5837	16.7623	43.1245	387.545	41.979	68.2947	16.3558	41.4519	381.035	38.9906	67.4778
D111	16.132	39.5957	371.045	36.6785	67.587	16.479	42.576	373.728	28.691	66.4227	16.7323	43.736	406.245	40.9053	67.986	16.4624	41.7179	384.65	36.4585	67.4313
Xiangmai35	16.0337	39.3277	401.164	32.2115	66.047	16.0447	42.581	346.791	26.5095	65.8497	17.1217	41.043	410.38	49.99	68.782	16.426	41.0202	386.347	37.0737	67.144
Xinchun11	16.6915	43.6743	384.972	51.2755	67.201	15.9533	38.916	321.88	30.3997	66.741	16.658	41.6043	373.085	44.336	68.615	16.4431	41.3889	367.343	41.3749	67.5976
Chuanyu21	16.6383	42.0065	402.652	39.9695	67.2087	16.501	42.4443	352.925	36.3687	66.7317	16.8363	43.229	381.649	50.0975	68.2327	16.6227	42.1852	381.292	41.5402	67.4749
Chuanmai45	16.4597	42.5325	406.936	49.477	68.9055	16.056	40.2805	315.74	31.775	65.7973	15.574	39.6425	364.364	41.5735	67.843	16.17	40.9235	369.073	40.5962	67.5228
Xinchun7	16.663	42.1395	399.799	49.1965	69.3405	15.9687	41.0033	348.078	27.0615	65.8397	16.551	42.636	378.868	41.4257	67.0437	16.4217	41.7003	374.66	39.3016	67.4184
13B2740	17.6387	44.5167	410.917	40.6325	68.5137	16.599	39.655	361.156	26.8395	66.7253	17.6035	43.442	433.28	52.8875	69.0297	17.0823	42.224	397.88	40.0005	68.0126
Neimai9	16.3825	42.9133	397.22	44.819	68.1887	16.4713	42.2505	371.075	32.4605	66.6357	15.927	38.911	357.246	45.593	67.896	16.3171	41.349	378.447	40.632	67.6154
Xikemai2	15.8737	38.1077	378.236	37.4815	67.8573	15.9097	39.239	341.169	29.6655	66.414	16.3767	38.532	387.713	41.2715	68.6087	16.1622	39.3401	373.961	37.0003	67.6563
Dongmai51099	16.7797	41.0717	407.567	49.465	69.397	17.3833	44.7823	406.203	34.0887	67.6933	17.3383	45.4745	443.682	48.7287	69.2987	17.0097	43.0437	410.781	42.9816	68.5296
Xiangmai19	16.4477	40.016	409.797	47.6715	67.706	16.557	43.294	367.672	37.707	67.1107	16.3467	42.307	415.572	40.518	68.15	16.4644	41.6575	394.882	41.3918	67.6858
Jingmai1	16.656	41.147	401.299	36.6603	67.6453	17.1043	42.279	371.545	30.511	67.4167	17.673	45.5417	388.544	40.1165	68.4103	16.9925	42.5282	387.175	36.6986	67.8083
Chuanmai58	16.2633	41.093	406.443	44.5665	66.619	17.199	43.289	350.528	32.356	67.0237	17.6037	47.004	432.26	45.7703	68.5083	16.8993	43.0556	393.955	40.5911	67.5135
Chuannong23	15.425	37.478	357.712	42.7685	66.8255	15.945	39.285	331.055	32.5347	65.7717	16.853	42.008	376.494	48.8197	68.222	16.2053	40.0438	363.77	40.9576	67.1488
Liangmai3	16.3637	38.9723	374.227	31.5985	67.291	16.311	41.8317	340.1	21.7845	65.4793	17.578	43.9135	413.292	43.4847	68.9107	16.693	41.4313	378.798	34.1443	67.3596
Sw20812	15.8935	40.132	340.903	30.14	65.934	16.38	41.5325	346.158	23.676	66.0603	17.3233	43.4827	402.612	40.124	69.3277	16.5494	41.5951	369.714	33.3624	67.3208
Chuanyu20	16.5703	39.2275	382.75	45.212	67.7703	16.4813	41.7715	360.987	27.6447	66.2987	16.4387	40.5253	374.202	34.066	67.7857	16.4996	40.6919	376.679	36.5991	67.3933
Jingzhuan2	16.431	37.982	359.957	47.036	67.712	17.7347	48.1075	440.365	44.5335	68.858	17.2323	43.639	418.345	53.1753	69.3743	16.9835	42.6717	401.157	46.1505	68.392
Shumai375	15.8047	36.635	366.526	34.322	66.723	16.661	40.985	359.316	33.1037	66.792	16.2117	40.8153	363.69	42.024	68.3933	16.2934	39.9732	369.679	36.4993	67.4386
Shumai482	16.8323	43.236	408.197	43.8273	67.572	16.0053	42.0265	360.035	30.527	65.8073	15.904	40.408	368.917	51.8385	68.2633	16.3294	41.691	381.492	41.4729	67.3375
Dongmai504060	16.4623	41.4345	418.469	47.801	68.875	17.4453	44.3585	419.389	39.318	67.554	16.9823	42.9015	422.901	47.8555	69.497	16.8547	42.413	411.371	43.6727	68.4318
Xinchun10	15.8237	37.923	371.393	42.939	66.4623	15.4403	38.419	326.98	31.664	65.5097	16.2167	39.572	368.413	41.6095	68.203	15.9899	39.3617	364.141	38.9586	66.9624
Xinchun15	15.7217	37.471	340.489	26.406	65.8973	16.0337	39.8025	350.393	30.019	66.6457	16.001	39.6987	364.241	36.096	67.727	16.0598	39.6098	361.439	33.0059	66.9867
Chuanyu18	16.513	41.472	390.102	42.908	67.5835	16.404	42.4225	356.788	27.296	65.939	17.142	42.1695	391.671	45.007	69.0593	16.6483	41.785	381.591	38.7069	67.5881
Chuanmai52	15.939	39.0947	376.442	37.7225	67.329	15.7127	40.349	331.718	28.541	65.366	16.497	41.7773	374.736	39.8595	67.6727	16.1593	40.617	368.063	36.4092	67.0069
Chuanmai41	15.566	37.6295	392.656	40.191	67.1087	15.8883	39.4285	316.769	22.4375	65.255	16.7475	42.672	386.972	36.107	66.4873	16.1788	40.2728	371.351	34.5673	66.6227
Dongmai10	15.8203	38.014	378.545	36.8105	67.1433	16.3303	41.645	356.084	26.5167	66.102	16.3753	40.474	381.622	41.9755	67.7227	16.255	40.3844	376.185	36.1849	67.1658
Xinchun18	16.2173	36.838	364.365	32.296	67.5277	15.161	37.6777	335.943	23.248	65.419	14.8917	35.1177	331.797	31.0187	66.0433	15.6828	37.8002	355.285	31.4563	66.6584
Xinchun9	16.1433	38.802	382.048	37.285	66.8757	15.562	39.5147	351.774	26.306	65.594	15.808	39.3947	371.362	35.275	67.848	15.9982	39.7693	373.297	34.5916	66.9877
Mianyang30	16.4823	40.5467	385.087	35.963	67.6133	15.4587	40.561	364.197	29.567	66.0393	14.914	36.9635	364.243	47.048	67.5387	15.8695	39.8986	375.536	38.0251	67.2231
Miannong7	16.5453	40.993	403.214	55.302	67.8727	15.939	39.728	362.233	27.517	65.7473	16.092	40.166	394.419	43.0493	67.5575	16.2678	40.5667	386.876	41.2806	67.2298
Lemai3	16.6747	41.2243	413.492	41.396	67.5777	15.817	39.883	349.491	25.2425	65.61	16.7975	41.807	426.641	45.9837	68.402	16.4408	41.0217	394.267	38.0882	67.3045
Mianmai42	16.7067	40.036	413.947	52.3505	68.0777	17.339	44.6025	392.221	32.832	66.4643	16.944	43.707	398.538	41.9093	68.0577	16.8586	42.3297	397.564	41.6467	67.5844
Jing01-7	16.728	42.149	417.011	45.2583	68.2373	16.03	42.025	370.536	26.8385	66.636	16.703	39.8145	403.041	42.18	67.8713	16.4833	41.3148	394.388	38.5232	67.6301
Liangmai2	15.906	39.5537	398.876	44.194	68.42	16.4823	42.7805	376.337	36.5517	67.1273	16.4457	40.6067	388.53	42.789	68.311	16.3332	41.0084	387.781	40.837	67.9073
Nan30-2	16.0023	39.3797	394.592	33.8535	66.348	16.0753	42.644	352.204	35.768	66.1477	16.542	40.692	413.717	42.018	68.458	16.2788	40.9549	386.819	37.8096	67.2049
Chuanmai39	16.784	40.8143	399.695	47.8403	67.7063	15.7733	38.0355	316.61	27.052	65.586	16.0463	39.3943	385.945	41.039	67.0983	16.2747	39.9282	372.776	38.934	67.0177
Xinchun14	16.391	40.624	392.951	42.4703	67.1467	16.9123	43.334	387.586	35.6703	67.1053	16.3173	40.7697	371.087	40.145	67.0903	16.5327	41.4418	385.098	39.478	67.2618
Xinchun16	15.618	39.351	368.033	39.021	66.487	15.7567	41.878	333.842	25.098	64.8425	15.636	38.589	356.859	35.3373	66.2377	15.8707	40.2565	362.113	34.7067	66.3215
Mianmai43	15.9163	39.4707	351.356	32.835	66.8493	16.2393	41.546	372.404	34.4845	67.0845	16.1	37.6265	367.68	47.788	67.908	16.1865	40.037	370.144	38.6809	67.3699
Yumai1	15.525	38.5293	354.232	36.656	66.1985	15.751	40.967	342.414	36.708	65.2777	17.3253	42.734	401.363	48.3405	68.1207	16.3012	40.8365	366.796	40.3667	66.8484
Kechengmai1	15.5633	38.0113	350.526	31.421	66.4127	15.872	40.7303	336.272	27.586	66.0643	16.0987	38.8883	378.581	37.6535	67.7723	16.0034	39.7417	363.798	34.0459	66.9814
Xinchun13	15.3943	38.0225	337.635	38.4015	66.3447	15.3337	39.2683	316.895	28.0265	65.546	15.713	40.6277	370.26	34.706	67.0707	15.7315	39.8347	353.745	35.17	66.651
Dongmai251	16.1883	41.661	382.583	43.5015	67.5443	16.183	41.7773	358.803	34.691	66.839	16.508	42.529	399.176	44.365	67.446	16.3436	41.7586	382.004	40.8731	67.4088
Chuanmai63	16.43	41.3945	396.548	42.284	67.411	15.7637	40.5123	327.875	25.646	65.673	16.558	43.9935	423.409	47.5745	67.235	16.3033	41.7198	383.481	38.7988	66.9993
Chuanzhongzu104	15.9563	38.2465	358.792	39.3505	66.4893	15.2877	38.9593	329.683	28.5015	65.65	15.6223	40.129	377.555	40.4423	66.6903	15.8341	39.6838	363.957	36.9562	66.6172
Chuanmai38	15.6933	38.3797	346.683	28.712	66.3507	15.8563	40.439	337.879	29.9513	66.729	15.38	38.8835	330.731	31.802	65.8523	15.8502	39.781	351.708	32.4742	66.6069
Chuanmai33	15.986	39.3273	372.914	34.242	66.9487	15.8697	38.637	339.624	24.474	65.716	15.6193	38.9427	401.363	39.8865	66.8917	15.9885	39.5856	371.911	34.4978	66.8165
Yangmai15	16.0333	38.1065	377.097	39.7735	67.46	15.4287	38.4357	313.889	26.6745	65.889	14.98	40.005	378.209	39.2465	66.6315	15.7585	39.4896	364.718	36.3158	66.961
Fumai2	16.3833	40.66	381.548	35.703	67.9727	16.248	41.2827	363.568	36.0745	67.0167	16.105	39.286	374.337	37.2095	67.461	16.3084	40.6087	377.074	37.1431	67.5461
Annong8559	16.776	43.4745	405.469	47.771	68.0553	15.727	40.3695	323.182	30.2655	65.4907	17.0287	42.9873	400.962	46.5847	67.6583	16.5001	41.9808	379.438	41.1284	67.2264
Liangmai4	17.1997	42.545	411.866	40.4037	69.8257	16.3617	39.975	378.815	27.9995	67.0563	16.9627	42.6285	426.36	41.3085	69.2437	16.7618	41.5939	400.759	37.339	68.489
Xinchun5	15.6423	38.0735	350.644	24.862	66.3525	14.8813	37.0517	297.017	28.2845	65.025	15.6507	38.3915	364.391	31.6685	66.6753	15.6586	38.754	350.814	31.0696	66.4291
Xinchun21	15.7403	38.204	379.759	43.161	67.8065	14.857	37.124	308.001	29.572	65.5297	14.9657	35.4435	349.25	37.6813	66.0703	15.5035	38.123	356.581	37.4559	66.7298
Dongmai15	18.4935	48.5645	464.564	51.477	70.4725	17.6673	45.6797	394.042	40.293	68.5973	18.0187	45.8007	469.295	52.9155	69.9897	17.6594	45.1356	427.589	46.119	69.1982
Xikemai5	16.751	42.473	398.738	51.7107	68.6227	16.3997	39.11	371.028	32.3955	67.4073	16.0517	38.6975	382.06	38.4425	67.2133	16.4266	40.4517	385.014	40.6453	67.7495
Chuanmai60	15.9063	39.426	364.653	42.678	67.721	15.643	38.9983	328.665	32.3345	65.6813	15.6957	37.8267	362.573	43.2223	66.8397	15.9301	39.3957	361.368	39.4567	66.9796
Dongmai1425	17.3443	43.7617	399.8	45.606	69.048	16.792	44.0973	368.325	26.621	66.582	16.352	41.219	384.632	39.223	66.849	16.7722	42.5617	385.143	37.7619	67.6076
Chuanmai37	17.624	45.328	416.587	47.5655	69.4523	17.602	46.923	392.454	34.701	67.241	17.3367	46.2145	394.377	39.5837	66.201	17.2486	44.7458	397.409	40.3196	67.7337
Chuannong27	17.47	45.7685	423.932	49.3715	69.5695	16.028	41.803	326.163	38.0653	65.91	17.1053	43.684	432.377	52.8755	68.693	16.7819	43.0304	391.796	45.0089	67.9218
Rongmai4	16.499	40.341	403.366	44.913	69.111	15.6153	38.384	341.628	29.1845	66.396	16.1887	40.508	386.633	38.013	67.5173	16.1872	40.1182	379.744	37.8812	67.6421
Dongmai22	17.3985	43.8775	427.214	41.285	68.5745	16.8117	42.199	399.725	31.205	66.967	17.524	44.5277	443.909	44.257	68.4233	17.0565	42.8932	413.828	39.0929	67.9161
Jingai21	18.6995	47.588	447.498	42.213	70.599	17.542	43.5045	385.531	40.5235	67.232	18.1153	46.0903	441.88	42.9877	69.3847	17.6985	44.4637	414.817	41.3173	68.7301
Chuanmai107	15.901	39.4743	355.331	36.394	66.4765	16.891	43.561	419.507	50.497	69.1357	16.1883	38.779	342.428	34.8005	67.7483	16.3871	40.7563	376.432	40.3352	67.8429
Chuanmai107	18.738	49.8935	483.714	52.872	70.5385	18.3517	48.4447	433.308	41.457	69.3367	17.8783	45.1253	460.867	49.018	69.605	17.8578	45.96	440.156	45.7612	69.3079
Wanmai48	16.511	41.5065	373.559	33.5605	67.496	16.271	40.89	353.935	26.3623	66.5313	16.7617	43.156	411.578	37.5983	67.7793	16.513	41.6629	381.68	34.2338	67.3846
Huamai21	16.2997	40.3575	396.702	45.2025	68.588	16.18	40.609	348.755	25.7075	65.364	17.053	40.8155	406.689	43.8075	69.1803	16.5104	40.7627	384.925	38.5829	67.761
Chuanzhongzu125	15.9	38.461	381.863	43.207	68.299	16.1947	39.8685	359.334	27.026	66.6507	17.486	44.123	434.925	39.555	68.061	16.5144	40.9228	390.659	37.3444	67.6726
Mianyang33	17.834	46.2135	439.698	43.5537	68.338	17.1337	45.521	386.288	36.6945	67.2737	17.4127	46.23	452.016	50.185	68.8483	17.2105	44.639	415.569	42.5249	68.0616
Chuanmai36	17.3775	44.5943	419.191	43.151	68.592	16.8867	42.916	371.927	31.574	67.6017	17.3247	45.119	415.015	36.452	68.347	17.019	43.3848	398.07	37.6934	68.0693
Chuanyu23	16.437	43.0203	379.185	48.5195	67.511	16.6743	45.612	379.567	41.415	67.151	16.998	41.9575	393.63	50.0043	67.9353	16.6644	42.8779	384.982	44.9233	67.5953
13R2740	17.1205	44.5085	408.803	43.891	67.6947	16.37	42.625	345.649	34.883	66.2803	16.2055	41.577	380.056	41.9633	67.2953	16.5481	42.4168	380.63	40.0666	67.2434
Mianmai38	17.277	43.11	407.215	36.2415	68.303	16.6863	45.094	357.669	38.517	66.646	16.331	42.065	394.12	41.659	67.7967	16.6824	42.8044	386.595	38.989	67.6219
Jingmai49	18.157	44.7255	460.769	44.5035	70.7355	16.3823	42.406	387.048	31.102	67.3677	17.3733	44.6965	454.238	46.908	70.0165	17.0757	43.1611	421.426	40.5418	68.914
Huamai8	17.7315	45.409	434.827	39.7465	68.409	17.612	45.072	377.731	24.2993	66.805	17.946	45.148	435.49	41.0665	69.301	17.4396	44.0834	408.183	36.1153	68.0487
07Jian3401	17.231	43.461	412.601	48.4105	68.7243	16.6647	42.29	353.453	33.058	66.6803	17.005	44.7535	395.693	43.179	68.2227	16.8434	42.8314	387.263	41.078	67.848
Chuanmai17	17.4703	45.2947	424.763	51.2437	69.1603	15.8825	39.663	342.681	37.0517	67.5727	16.6763	40.8853	387.188	45.566	68.9133	16.6592	41.7845	385.895	43.4551	68.366
Zhengmai132	17.409	43.2603	426.419	47.6287	69.3723	15.2527	37.8907	298.014	27.8983	65.396	17.1323	41.5495	412.772	44.007	67.792	16.5767	40.9733	381.21	39.8	67.5897
Chuanyu27	16.6537	41.922	399.799	53.8327	68.2273	15.6823	42.332	326.739	39.6043	65.4373	17.8173	45.41	399.586	52.295	68.8773	16.6678	42.6318	378.398	46.4296	67.5696
