# Supplementary material for: Genome-Wide Association Study Reveals the Genetic Basis of Five Quality Traits in Chinese Wheat
Source: Front Plant Sci. 2022 Mar 3;13:835306. doi: 10.3389/fpls.2022.835306 (PMC8928432; doi:10.3389/fpls.2022.835306)
Supplement: Supplementary Table 2 — Significant SNP for five quality traits in different environments identified by GWAS. [file Table_2.XLSX]

## Sheet: PC
Table S2.1 Significant SNP for protent content in different environments identified by GWAS
SNP name	Chromosome	Position (bp)	QTL	HJHQ			LH			WLTQQ			BLUP
				FarmCPU	GLM	MLM	FarmCPU	GLM	MLM	FarmCPU	GLM	MLM	FarmCPU	GLM	MLM
				P value	P value	P value	P value	P value	P value	P value	P value	P value	P value	P value	P value
Affx-109038026	1A	301162316	qPC1A		2.14e-05
Affx-111821382	1A	301178854		1.04e-05	7.19e-06	1.53e-05
Affx-110630714	1A	301211407		1.04e-05	7.19e-06	1.53e-05
Affx-109196962	1A	301224271		1.04e-05	7.19e-06	1.53e-05
Affx-111358232	1A	301487277		1.04e-05	7.19e-06	1.53e-05
Affx-109270981	1A	301629723		1.04e-05	7.19e-06	1.53e-05
Affx-92577004	1A	301857698		1.04e-05	7.19e-06	1.53e-05
Affx-111392245	1A	301891708		1.04e-05	7.19e-06	1.53e-05
Affx-109090656	1A	301897481		1.04e-05	7.19e-06	1.53e-05
Affx-109256989	1A	301900920		1.04e-05	7.19e-06	1.53e-05
Affx-111906993	1A	301903267		1.94e-05	1.32e-05	2.58e-05
Affx-111960154	1A	302198990		1.04e-05	7.19e-06	1.53e-05
Affx-109239281	1A	302218996		1.04e-05	7.19e-06	1.53e-05
Affx-110831588	1A	302261391		1.04e-05	7.19e-06	1.53e-05
Affx-111742559	1A	302625821		1.04e-05	7.19e-06	1.53e-05
Affx-109343584	1A	302897112		1.04e-05	7.19e-06	1.53e-05
Affx-111777606	1A	302905054		1.04e-05	7.19e-06	1.53e-05
Affx-111064361	1A	302957051		1.04e-05	7.19e-06	1.53e-05
Affx-110248555	1A	302971689		1.04e-05	7.19e-06	1.53e-05
Affx-110821468	1A	303024845		1.8e-05	9.36e-06	1.92e-05								2.29e-05
Affx-111553188	1A	303347851		8.12e-06	5.8e-06	1.27e-05
Affx-111194406	1A	303408476		1.46e-05	9.44e-06	1.93e-05
Affx-111059009	1A	303419268		1.75e-05	8.04e-06	1.68e-05								2.21e-05
Affx-111620887	1A	303533496			1.71e-05	3.24e-05
Affx-109307440	1A	303727468		1.04e-05	7.19e-06	1.53e-05
Affx-88364991	1A	303851609		1.04e-05	7.19e-06	1.53e-05
Affx-108925088	1A	303913839		1.04e-05	7.19e-06	1.53e-05
Affx-110379194	1A	304020506		1.04e-05	7.19e-06	1.53e-05
Affx-111856897	1A	304177126		1.04e-05	7.19e-06	1.53e-05
Affx-109496046	1A	304619033		1.8e-05	9.36e-06	1.92e-05
Affx-109891770	1A	304849708		8.12e-06	5.8e-06	1.27e-05
Affx-109797168	1A	304987280		3.06e-05	2.4e-05
Affx-109875848	1A	304992002		1.04e-05	7.19e-06	1.53e-05
Affx-88364300	1A	304999185		1.04e-05	7.19e-06	1.53e-05
Affx-92645323	1A	305003294		1.04e-05	7.19e-06	1.53e-05
Affx-111596093	1A	305112354		1.04e-05	7.19e-06	1.53e-05
Affx-88726607	1A	305366304		1.04e-05	7.19e-06	1.53e-05
Affx-110659594	1A	305404584		1.08e-05	6.61e-06	1.42e-05
Affx-110318627	1A	305510776		1.04e-05	7.19e-06	1.53e-05
Affx-109330898	1A	305604321		1.1e-05	7.06e-06	1.5e-05
Affx-111681769	1A	305610490		1.04e-05	7.19e-06	1.53e-05
Affx-109593873	1A	306103781		1.04e-05	7.19e-06	1.53e-05
Affx-88403752	1A	306119522		2.16e-05	9.91e-06	2.02e-05								2.12e-05
Affx-108903719	1A	306615654		1.04e-05	7.19e-06	1.53e-05
Affx-109244807	1A	307030144		1.04e-05	7.19e-06	1.53e-05
Affx-88585277	1A	307034390		1.1e-05	7.06e-06	1.5e-05
Affx-88380874	1A	307037391		1.04e-05	7.19e-06	1.53e-05
Affx-110706230	1A	307060255		1.04e-05	7.19e-06	1.53e-05
Affx-110501230	1A	307241252		1.04e-05	7.19e-06	1.53e-05
Affx-109415677	1A	307484630		8.64e-06	5.7e-06	1.25e-05
Affx-109290107	1A	307683571		1.04e-05	7.19e-06	1.53e-05
Affx-110135156	1A	307689374		1.04e-05	7.19e-06	1.53e-05
Affx-110739703	1A	307694079		2.48e-05	1.71e-05	3.24e-05
Affx-109610528	1A	307699290		1.04e-05	7.19e-06	1.53e-05
Affx-88778870	1A	307703199		1.04e-05	7.19e-06	1.53e-05
Affx-109714761	1A	307719008		1.04e-05	7.19e-06	1.53e-05
Affx-110645443	1A	308200282		1.48e-05	1.06e-05	2.13e-05
Affx-109167527	1A	308361191		1.12e-05	7.19e-06	1.53e-05
Affx-110318162	1A	308378988		3.06e-05	2.4e-05
Affx-108953270	1A	308390322		1.04e-05	7.19e-06	1.53e-05
Affx-88388513	1A	308435120		8.12e-06	5.8e-06	1.27e-05
Affx-111775071	1A	308574673		1.04e-05	7.19e-06	1.53e-05
Affx-109038721	1A	308577946		1.04e-05	7.19e-06	1.53e-05
Affx-110506199	1A	308586525		8.12e-06	5.8e-06	1.27e-05
Affx-109235147	1A	308808799		1.04e-05	7.19e-06	1.53e-05
Affx-110320207	1A	308951536		2.81e-05	2.38e-05
Affx-111240187	1A	313121935			2.74e-05
Affx-109573089	1A	318191337		2.49e-05	2.07e-05
Affx-109890531	1D	21908095	qPC1D.1	1.76e-05	1.4e-05	2.71e-05
Affx-111217119	1D	240888910	qPC1D.2	1.04e-05	7.19e-06	1.53e-05
Affx-111472438	2B	723962196	qPC2B	1.23e-05	1.21e-05	2.4e-05
Affx-110578395	2D	481592235	qPC2D	3.02e-05
Affx-110120876	2D	487313590		2.99e-05
Affx-92277730	3D	571362199	qPC3D	2.79e-05	2.62e-05
Affx-92735425	3D	571493682		3.04e-05	2.77e-05
Affx-88603031	3D	572830191		9.11e-06	9.32e-06	1.91e-05
Affx-88479715	5A	71398743	qPC5A.1		3.15e-05
Affx-109126958	5A	83273144	qPC5A.2		3.14e-05
Affx-110502762	5A	479282622	qPC5A.3	1.24e-06	1.34e-06	3.65e-06							2.88e-06	2.84e-06	6.91e-06
Affx-109736812	5A	479307507		1.24e-06	1.34e-06	3.65e-06							2.88e-06	2.84e-06	6.91e-06
Affx-111989348	5A	479325103		2.13e-06	2.44e-06	6.07e-06							6.85e-06	7.06e-06	1.5e-05
Affx-111209028	5D	547508599	qPC5D	2.28e-05	2.42e-05
Affx-92533779	5D	547527270		2.28e-05	2.42e-05
Affx-109131257	5D	547558003		2.39e-05	2.46e-05
Affx-111485355	5D	547563366		2.58e-05	3.08e-05
Affx-110710905	5D	547690206		2.28e-05	2.42e-05
Affx-92784521	5D	547709624		1.11e-05	1.42e-05	2.75e-05
Affx-109339842	5D	547711797		2.63e-05
Affx-109316613	5D	547881554		2.28e-05	2.42e-05
Affx-109575706	5D	547884860		1.33e-05	1.15e-05	2.28e-05
Affx-111913626	5D	547895686		2.28e-05	2.42e-05
Affx-111604354	5D	547897035		2.81e-05
Affx-108983326	5D	547924457		2.79e-05	2.85e-05
Affx-111587965	5D	548000042		2.55e-05	2.71e-05
Affx-111946839	5D	548350917		2.67e-05	2.75e-05
Affx-109843224	5D	548377711		2.55e-05	2.71e-05
Affx-109045368	5D	548458598		2.55e-05	2.71e-05
Affx-110308755	5D	549016800			3.24e-05
Affx-88703758	6A	105181270	qPC6A.1	2.82e-05	2.4e-05
Affx-88596565	6A	107211012		1.41e-05	1.23e-05	2.42e-05
Affx-110678462	6A	148248467	qPC6A.2	1.38e-05	1.05e-05	2.12e-05
Affx-110088992	6A	148524505		2.28e-05	1.69e-05	3.21e-05
Affx-110671167	6A	171462129	qPC6A.3	2.5e-05	1.73e-05
Affx-108856788	6A	196819052	qPC6A.4	2.28e-05	1.6e-05	3.05e-05
Affx-111741368	6B	658736053	qPC6B	7.51e-06	7.07e-06	1.51e-05
Affx-88489387	6B	658833342		7.25e-06	6.46e-06	1.39e-05
Affx-111755936	6D	437620622	qPC6D	2.99e-05
Affx-88712031	7B	605955822	qPC7B	2e-05
Affx-111767006	2B	31118199	qGC2B.1	5.93e-05
Affx-109519959	2B	31418129		5.93e-05
Affx-111472438	2B	723962196	qGC2B.2							3.43e-05	1.95e-05		6.72e-05
Affx-109061076	2B	731601932								1.48e-05	9.17e-06	1.89e-05
Affx-111998281	2D	381880185	qGC2D.1							9.18e-06	9.3e-06	1.9e-05
Affx-109643287	2D	383392816								2.75e-05	2.71e-05
Affx-109013026	2D	383553293								6.56e-05
Affx-111030409	2D	387562470								1.24e-05	1.2e-05	2.37e-05
Affx-110818526	2D	391088032								1.52e-05	1.35e-05	2.64e-05
Affx-111615240	2D	391281094								1.91e-05	1.92e-05
Affx-111550232	2D	415244662	qGC2D.2							9.02e-05
Affx-109849942	3B	668891822	qGC3B							9.06e-05
Affx-111028154	3D	501056082	qGC3D							5.89e-05
Affx-110502762	5A	479282622	qGC5A	1.33e-06	1.22e-06	3.37e-06							6.78e-07	5.16e-07	1.65e-06
Affx-109736812	5A	479307507		1.33e-06	1.22e-06	3.37e-06							6.78e-07	5.16e-07	1.65e-06
Affx-111989348	5A	479325103		1.34e-06	1.3e-06	3.56e-06							1.27e-06	1.03e-06	2.93e-06
Affx-92820032	6A	18713168	qGC6A.1	7.04e-05
Affx-109184187	6A	22630393		3.83e-05
Affx-88703758	6A	105181270	qGC6A.2	9.43e-05
Affx-111466411	6B	217680379	qGC6B.1	8.67e-05
Affx-109734267	6B	218260405		5.78e-05
Affx-110449095	6B	223399864		5.78e-05
Affx-109630378	6B	225177814		5e-05
Affx-109794925	6B	226390965		2.92e-05	2.16e-05
Affx-109826713	6B	228249987		6.07e-05
Affx-110905373	6B	229546174		7.62e-05
Affx-111318122	6B	231347217		7.62e-05
Affx-111237286	6B	231573850		7.62e-05
Affx-109759921	6B	232786781		3.66e-05	2.56e-05
Affx-110732859	6B	235922116		5.53e-05
Affx-109399670	6B	443671528	qGC6B.2	1.26e-05	7.4e-06	1.57e-05							8.09e-05
Affx-110517092	6B	461416828	qGC6B.3	9.08e-05
Affx-109283283	6D	438928597	qGC6D	3.59e-05	2.82e-05
Affx-111025650	7A	40668087	qGC7A.1	8.66e-06	6.88e-06	1.47e-05
Affx-110041372	7A	603948191	qGC7A.2	8.36e-05
Affx-110268258	1B	656855154	qBV1B							1.05e-05	5.74e-06	1.41e-05
Affx-88722941	2D	419865085	qBV2D.1							2.78e-05	1.21e-05	2.65e-05
Affx-110578395	2D	481592235	qBV2D.2							2.43e-05	2.44e-05
Affx-109638707	2D	489715115								1.91e-05	2.52e-05		6.87e-06	7.43e-06	1.57e-05
Affx-111700456	3D	137888921	qBV3D.1							2.58e-05
Affx-92277730	3D	571362199	qBV3D.2										1.56e-05	2.16e-05
Affx-92735425	3D	571493682									3.14e-05		1.94e-05	2.79e-05
Affx-88603031	3D	572830191								9.8e-06	9.03e-06	1.78e-05	1.33e-05	1.93e-05
Affx-111719969	4A	174391737	qBV4A								3.05e-05
Affx-88667201	4B	479405842	qBV4B.1							1.7e-05	1.63e-05	2.96e-05
Affx-111282396	4B	658769852	qBV4B.2				2.21e-05
Affx-111645001	4B	658985211					1.06e-05	1.22e-05	2.42e-05
Affx-111935993	4B	659069263					9.47e-06	1.42e-05	2.76e-05
Affx-110360842	4D	47319858	qBV4D				1.48e-05	1.59e-05	3.04e-05				1.47e-05	1.99e-05
Affx-110502762	5A	479282622	qBV5A										2.37e-05	2.65e-05
Affx-109736812	5A	479307507											2.37e-05	2.65e-05
Affx-92452824	5D	547502682	qBV5D				1.66e-05	2.16e-05					2.29e-05
Affx-92625536	5D	547504960					1.66e-05	2.16e-05					2.29e-05
Affx-111209028	5D	547508599					2.2e-05	2.55e-05					1.92e-05	2.55e-05
Affx-108938283	5D	547519725					2.45e-05	2.52e-05					2.34e-05	3.19e-05
Affx-92533779	5D	547527270					2.2e-05	2.21e-05					1.92e-05	2.55e-05
Affx-109131257	5D	547558003											2.95e-05
Affx-111485355	5D	547563366					1.41e-05	1.72e-05					1.4e-05	2.22e-05
Affx-110710905	5D	547690206					2.2e-05	2.21e-05					1.92e-05	2.55e-05
Affx-92784521	5D	547709624					6.93e-06	9.46e-06	1.93e-05				7.06e-06	1.21e-05	2.39e-05
Affx-111886009	5D	547829960					2.45e-05	2.52e-05					2.34e-05	3.19e-05
Affx-109316613	5D	547881554					2.2e-05	2.21e-05					1.92e-05	2.55e-05
Affx-109575706	5D	547884860					2.1e-05	1.54e-05	2.95e-05				1.67e-05	1.66e-05	3.15e-05
Affx-110453090	5D	547892375					1.74e-05	1.5e-05	2.89e-05				3e-05
Affx-111913626	5D	547895686					2.2e-05	2.21e-05					1.92e-05	2.55e-05
Affx-111604354	5D	547897035					1.49e-05	1.9e-05					1.89e-05	3.1e-05
Affx-108983326	5D	547924457					2.07e-05	2e-05					2.09e-05	2.58e-05
Affx-111587965	5D	548000042					1.3e-05	1.37e-05					1.18e-05	1.56e-05
Affx-111844209	5D	548022662					2.72e-05	3.06e-05
Affx-109467178	5D	548041700					1.47e-05	1.59e-05	3.04e-05				1.48e-05	1.99e-05
Affx-111946839	5D	548350917					2.28e-05	2.48e-05					1.84e-05	2.37e-05
Affx-109843224	5D	548377711					1.3e-05	1.37e-05	2.67e-05				1.18e-05	1.56e-05	2.99e-05
Affx-109045368	5D	548458598					1.3e-05	1.37e-05	2.67e-05				1.18e-05	1.56e-05	2.99e-05
Affx-111164669	5D	548968743					2.98e-05	2.18e-05
Affx-110308755	5D	549016800					1.84e-05	1.27e-05	2.49e-05				1.64e-05	1.43e-05	2.77e-05
Affx-110753049	5D	549492496						3.02e-05
Affx-88568297	6B	613351172	qBV6B.1							1.98e-05	1.52e-05	3.07e-05
Affx-110624950	6B	613472297								2.17e-05	1.86e-05
Affx-109482992	6B	613572805								1.98e-05	1.52e-05	3.07e-05
Affx-110068341	6B	614124551								1.98e-05	1.52e-05	3.07e-05
Affx-111481609	6B	614699875								1.98e-05	1.52e-05	3.07e-05
Affx-111905049	6B	615161867								1.98e-05	1.52e-05	3.07e-05
Affx-111621315	6B	615387859								1.98e-05	1.52e-05	3.07e-05
Affx-110492977	6B	615933121								1.98e-05	1.52e-05	3.07e-05
Affx-110487591	6B	616244120								1.98e-05	1.52e-05	3.07e-05
Affx-110660697	6B	624015752								1.98e-05	1.52e-05	3.07e-05
Affx-88567189	6B	624497030								1.98e-05	1.52e-05	3.07e-05
Affx-110381963	6B	632441017								1.8e-05	1.54e-05	3.03e-05	1.47e-05	2.09e-05
Affx-111741368	6B	658736053	qBV6B.2				4.05e-07	8.38e-07	2.47e-06	2.28e-05	1.37e-05	2.98e-05	3.8e-07	3.72e-07	1.26e-06
Affx-88489387	6B	658833342					4.4e-07	7.81e-07	2.33e-06		2.05e-05		4.02e-07	3.71e-07	1.25e-06
Affx-88551147	6B	659576854					3.79e-06	7.89e-06	1.65e-05				6.33e-06	8.04e-06	1.68e-05
Affx-108936361	6B	659920570					3.79e-06	7.89e-06	1.65e-05				6.33e-06	8.04e-06	1.68e-05
Affx-111526283	6B	659952927					3.92e-06	9.99e-06	2.03e-05	2.97e-05	3.03e-05		2.17e-06	4.08e-06	9.39e-06
Affx-108938136	6B	661251079					3.92e-06	9.99e-06	2.03e-05	2.97e-05	3.03e-05		2.17e-06	4.08e-06	9.39e-06
Affx-108938428	6B	662451209											1.71e-05	2.77e-05
Affx-111755936	6D	437620622	qBV6D				6.91e-06	2.7e-05		1.77e-06	1.83e-06	4.75e-06	4.18e-07	1.01e-06	2.87e-06
Affx-88712031	7B	605955822	qBV7B.1								1.46e-05	3.17e-05	2.67e-05	2.02e-05
Affx-88708456	7B	634291916	qBV7B.2							1.72e-05
Affx-109875892	7B	634296992					1.05e-05	2.68e-05		2.78e-05	3.06e-05		4.9e-06	8.5e-06	1.76e-05
Affx-109475205	7B	634386914					1.05e-05	2.68e-05		2.78e-05	3.06e-05		4.9e-06	8.5e-06	1.76e-05
Affx-110752571	7B	634569700											1.44e-05
Affx-110887993	7B	634871855											1.44e-05
Affx-110094224	7B	635000643											1.44e-05
Affx-110646254	7B	635019692											1.44e-05
Affx-109510439	7D	515224099	qBV7D										3.24e-05
Affx-109771372	1A	54498547	qHA1A.1								1.57e-06			1.06e-06
Affx-109038026	1A	301162316	qHA1A.2		8.82e-07
Affx-111821382	1A	301178854			8.19e-07
Affx-110630714	1A	301211407			8.19e-07
Affx-109196962	1A	301224271			8.19e-07
Affx-111358232	1A	301487277			8.19e-07
Affx-109270981	1A	301629723			8.19e-07
Affx-92577004	1A	301857698			8.19e-07
Affx-111392245	1A	301891708			8.19e-07
Affx-109090656	1A	301897481			8.19e-07
Affx-109256989	1A	301900920			8.19e-07
Affx-111906993	1A	301903267			1.13e-06
Affx-111960154	1A	302198990			8.19e-07
Affx-109239281	1A	302218996			9.09e-07
Affx-110831588	1A	302261391			8.19e-07
Affx-111742559	1A	302625821			8.19e-07
Affx-109343584	1A	302897112			8.19e-07
Affx-111777606	1A	302905054			8.19e-07
Affx-111064361	1A	302957051			8.19e-07
Affx-110248555	1A	302971689			8.19e-07
Affx-111553188	1A	303347851			7.98e-07
Affx-111194406	1A	303408476			8.1e-07
Affx-109307440	1A	303727468			8.19e-07
Affx-88364991	1A	303851609			8.19e-07
Affx-108925088	1A	303913839			8.19e-07
Affx-110379194	1A	304020506			8.19e-07
Affx-111856897	1A	304177126			8.19e-07
Affx-109496046	1A	304619033			8.19e-07
Affx-109891770	1A	304849708			8.19e-07
Affx-109875848	1A	304992002			8.19e-07
Affx-88364300	1A	304999185			8.19e-07
Affx-92645323	1A	305003294			8.19e-07
Affx-111596093	1A	305112354			8.19e-07
Affx-88726607	1A	305366304			8.19e-07
Affx-110659594	1A	305404584			1.13e-06
Affx-110318627	1A	305510776			8.19e-07
Affx-109330898	1A	305604321			9.09e-07
Affx-111681769	1A	305610490			8.19e-07
Affx-109593873	1A	306103781			8.19e-07
Affx-108903719	1A	306615654			8.19e-07
Affx-109244807	1A	307030144			8.19e-07
Affx-88585277	1A	307034390			9.09e-07
Affx-88380874	1A	307037391			8.19e-07
Affx-110706230	1A	307060255			8.19e-07
Affx-110501230	1A	307241252			8.19e-07
Affx-109415677	1A	307484630			8.85e-07
Affx-109290107	1A	307683571			8.19e-07
Affx-110135156	1A	307689374			8.19e-07
Affx-109610528	1A	307699290			8.19e-07
Affx-88778870	1A	307703199			8.19e-07
Affx-109714761	1A	307719008			8.19e-07
Affx-109167527	1A	308361191			6.9e-07
Affx-108953270	1A	308390322			8.19e-07
Affx-88388513	1A	308435120			7.98e-07
Affx-111775071	1A	308574673			8.19e-07
Affx-109038721	1A	308577946			8.19e-07
Affx-110506199	1A	308586525			7.98e-07
Affx-109235147	1A	308808799			8.19e-07
Affx-88655149	1B	336204650	qHA1B.1								6.32e-07			4.91e-07	1.58e-06
Affx-111907680	1B	336269121									7.93e-08	4.7e-07		9.45e-08	4.09e-07
Affx-111581811	1B	338002884									2.32e-07	1.04e-06		1.04e-07	4.43e-07
Affx-111314446	1B	338226412									1.14e-07	5.68e-07		3.97e-08	2.04e-07
Affx-109797470	1B	338428325									5.06e-07			2.11e-07	7.86e-07
Affx-109827565	1B	339581715									3.12e-08	1.89e-07		1.04e-08	7.03e-08
Affx-109312412	1B	340327296									2.58e-07	1.11e-06		9.88e-08	4.24e-07
Affx-110363122	1B	343249187									1.09e-06			1.17e-06
Affx-110268258	1B	656855154	qHA1B.2								1.08e-06
Affx-111217119	1D	240888910	qHA1D		8.19e-07
Affx-109329377	2B	30549242	qHA2B.1											9.71e-07
Affx-110799594	2B	105477984	qHA2B.2								1.15e-06			1.85e-07	7.07e-07
Affx-110741338	2B	749067388	qHA2B.3											5.3e-07
Affx-110469844	2B	749289653												5.3e-07
Affx-88520727	2D	34231554	qHA2D.1								3.49e-08	3.01e-07		6.87e-09	5.09e-08
Affx-109638707	2D	489715115	qHA2D.2								1.47e-06
Affx-111700456	3D	137888921	qHA3D.1								1.11e-06
Affx-92277730	3D	571362199	qHA3D.2					3.68e-07	1.05e-06		4.6e-08	1.97e-07		2.05e-09	1.99e-08
Affx-92735425	3D	571493682						2.25e-07	6.88e-07		4.33e-08	1.88e-07		2.42e-09	2.27e-08
Affx-88603031	3D	572830191						1.74e-07	5.65e-07		1.41e-08	8.55e-08		1.23e-09	1.35e-08
Affx-110612607	4A	11985991	qHA4A											7.51e-07
Affx-109944260	4B	465746296	qHA4B.1								7.25e-07			1.37e-06
Affx-109841286	4B	465900369									1.33e-06
Affx-109214462	4B	477239477	qHA4B.2								1.55e-06
Affx-88667201	4B	479405842									9.53e-08	4.17e-07		7.05e-07
Affx-111554515	4B	479415717									1.67e-07	4.55e-07		1.06e-06
Affx-88495978	4B	480592448									7.41e-07
Affx-88373180	4B	480597474									4.05e-07	9.89e-07
Affx-111064010	4B	480684318									7.41e-07
Affx-88805821	4B	480690322									7.41e-07
Affx-109066984	4B	480827714									7.41e-07
Affx-110490700	4B	480833107									7.41e-07
Affx-110885001	4B	480836143									9.17e-07
Affx-109801902	4B	480845555									7.41e-07
Affx-110973383	4B	480918302									7.41e-07
Affx-109286369	4B	480926079									7.41e-07
Affx-109497797	4B	480950891									7.41e-07
Affx-109348153	4B	481101554									6.4e-07	1.51e-06
Affx-109612564	4B	481189214									7.41e-07
Affx-110341345	4B	481203296									7.41e-07
Affx-109668094	4B	481214070									1.51e-06
Affx-109676767	4B	481216303									2.62e-07	7.03e-07		1.57e-06
Affx-109775549	4B	481222938									4.17e-07	1.09e-06
Affx-88488276	4B	481237159									7.41e-07
Affx-109978913	4B	481242732									6.83e-07	1.54e-06
Affx-111449682	4B	481356385									7.15e-07	1.55e-06
Affx-110226630	4B	481521146									7.41e-07
Affx-109890964	4B	481579715									8.03e-07
Affx-88653553	4B	481599226									6.09e-07	1.37e-06
Affx-111498312	4B	481604442									7.41e-07
Affx-88393875	4B	481638297									6.83e-07	1.54e-06
Affx-110318717	4B	481803752									7.41e-07
Affx-110906918	4B	658659028	qHA4B.3					1.16e-06						4.71e-08	2.33e-07
Affx-110464416	4B	658683929						1.16e-06						4.71e-08	2.33e-07
Affx-111282396	4B	658769852						7.56e-07						2.64e-08	1.47e-07
Affx-109286698	4B	658776857						1.16e-06						4.71e-08	2.33e-07
Affx-109730117	4B	658787586						1.16e-06						4.71e-08	2.33e-07
Affx-110554603	4B	658822514						1.16e-06						4.71e-08	2.33e-07
Affx-111645001	4B	658985211						1.18e-07	4.9e-07		6.95e-07			3.96e-09	3.32e-08
Affx-111783645	4B	658988957						1.16e-06						4.71e-08	2.33e-07
Affx-88549281	4B	659066723												4.41e-07	1.44e-06
Affx-111935993	4B	659069263						2.05e-07	7.42e-07		1.06e-06			9.3e-09	6.45e-08
Affx-88566185	4B	659153083						1.16e-06						4.71e-08	2.33e-07
Affx-88631051	4B	659160087						1.16e-06						4.71e-08	2.33e-07
Affx-110360842	4D	47319858	qHA4D					6.19e-07			4.03e-08	2.39e-07		4.26e-09	3.51e-08
Affx-109544028	5A	18838101	qHA5A.1											1.38e-06
Affx-109211134	5A	516642589	qHA5A.2											5.53e-07
Affx-111528231	5B	590530563	qHA5B.1											5.73e-08	2.73e-07
Affx-110253061	5B	681127703	qHA5B.2	1.19e-06
Affx-109635326	5B	712402093	qHA5B.3		1.12e-06									3.82e-07	1.28e-06
Affx-92452824	5D	547502682	qHA5D								2.32e-07	8.73e-07		5.3e-08	2.57e-07
Affx-92625536	5D	547504960									2.32e-07	8.73e-07		5.3e-08	2.57e-07
Affx-111209028	5D	547508599									1.35e-07	6.03e-07		2.87e-08	1.57e-07
Affx-108938283	5D	547519725									1.23e-07	5.44e-07		3.15e-08	1.69e-07
Affx-92533779	5D	547527270									1.35e-07	6.03e-07		2.87e-08	1.57e-07
Affx-111976104	5D	547547344												8.72e-07
Affx-109131257	5D	547558003									1.71e-07	7.29e-07		4.55e-08	2.27e-07
Affx-111485355	5D	547563366									1.94e-07	7.96e-07		3.36e-08	1.78e-07
Affx-110710905	5D	547690206									1.35e-07	6.03e-07		2.87e-08	1.57e-07
Affx-92784521	5D	547709624						8.04e-07			1.8e-07	7.11e-07		1.32e-08	8.49e-08
Affx-109339842	5D	547711797												6.13e-07
Affx-111886009	5D	547829960									1.23e-07	5.44e-07		3.15e-08	1.69e-07
Affx-109316613	5D	547881554									1.35e-07	6.03e-07		2.87e-08	1.57e-07
Affx-109575706	5D	547884860									4.9e-08	2.77e-07		1.35e-08	8.63e-08
Affx-110453090	5D	547892375						1.29e-06			1.18e-07	5.29e-07		2.49e-08	1.4e-07
Affx-111913626	5D	547895686									1.35e-07	6.03e-07		2.87e-08	1.57e-07
Affx-111604354	5D	547897035									2.57e-07	9.72e-07		4.86e-08	2.4e-07
Affx-108983326	5D	547924457									1.4e-07	6.54e-07		2.68e-08	1.49e-07
Affx-110703296	5D	547974390												4.3e-07	1.41e-06
Affx-111587965	5D	548000042						1e-06			4.35e-08	2.52e-07		3.72e-09	3.16e-08
Affx-111844209	5D	548022662									1.87e-07	8.15e-07		1.75e-08	1.06e-07
Affx-109467178	5D	548041700						6.19e-07			4.03e-08	2.39e-07		4.26e-09	3.51e-08
Affx-111946839	5D	548350917									5.56e-08	3.07e-07		6.14e-09	4.66e-08
Affx-109843224	5D	548377711						1e-06			4.35e-08	2.52e-07		3.72e-09	3.16e-08
Affx-109045368	5D	548458598						1e-06			4.35e-08	2.52e-07		3.72e-09	3.16e-08
Affx-110479400	5D	548475020						1.02e-06			3.09e-07	1.21e-06		1.83e-08	1.1e-07
Affx-109338887	5D	548487719									4.27e-07	1.56e-06		2.66e-08	1.48e-07
Affx-111164669	5D	548968743						5.67e-07			2.91e-07	1.15e-06		1.4e-08	8.91e-08
Affx-110948475	5D	548985376						1.02e-06			3.09e-07	1.21e-06		1.83e-08	1.1e-07
Affx-110308755	5D	549016800						4.3e-07	1.45e-06		9.26e-08	4.32e-07		3.51e-09	3.02e-08
Affx-110753049	5D	549492496									3.4e-07	1.29e-06		1.66e-08	1.02e-07
Affx-110782972	5D	549569470									4.75e-07			3.64e-08	1.9e-07
Affx-108944365	5D	549638211									1.61e-06			2.28e-07	8.4e-07
Affx-111913354	5D	549774594									3.66e-07	1.19e-06		7.49e-08	3.39e-07
Affx-109805677	5D	549984898									3.92e-07	1.33e-06		8.94e-08	3.92e-07
Affx-108904064	5D	550154693												1.43e-06
Affx-88462639	5D	550206088									7.58e-07			2.25e-07	8.32e-07
Affx-110400486	5D	550211080									7.58e-07			2.25e-07	8.32e-07
Affx-109776356	5D	550437961												6.28e-07
Affx-88383158	6B	577471471	qHA6B.1											4e-07	1.33e-06
Affx-88568297	6B	613351172	qHA6B.2		8.76e-08	3.85e-07					1.57e-09	2.89e-08		1.64e-10	2.97e-09
Affx-110624950	6B	613472297			5.65e-08	2.71e-07					3.57e-09	5.17e-08		2.87e-10	4.49e-09
Affx-109482992	6B	613572805			8.76e-08	3.85e-07					1.57e-09	2.89e-08		1.64e-10	2.97e-09
Affx-110068341	6B	614124551			8.76e-08	3.85e-07					1.57e-09	2.89e-08		1.64e-10	2.97e-09
Affx-111481609	6B	614699875			8.76e-08	3.85e-07					1.57e-09	2.89e-08		1.64e-10	2.97e-09
Affx-111905049	6B	615161867			8.76e-08	3.85e-07					1.57e-09	2.89e-08		1.64e-10	2.97e-09
Affx-111621315	6B	615387859			8.76e-08	3.85e-07					1.57e-09	2.89e-08		1.64e-10	2.97e-09
Affx-110492977	6B	615933121			8.76e-08	3.85e-07					1.57e-09	2.89e-08		1.64e-10	2.97e-09
Affx-110487591	6B	616244120			8.76e-08	3.85e-07					1.57e-09	2.89e-08		1.64e-10	2.97e-09
Affx-110660697	6B	624015752			8.76e-08	3.85e-07					1.57e-09	2.89e-08		1.64e-10	2.97e-09
Affx-88567189	6B	624497030			8.76e-08	3.85e-07					1.57e-09	2.89e-08		1.64e-10	2.97e-09
Affx-88785545	6B	624802486									1.17e-07	8.46e-07		1.17e-08	7.75e-08
Affx-109388114	6B	624962211									1.17e-07	8.46e-07		1.17e-08	7.75e-08
Affx-110624350	6B	625007429									1.48e-07	1.03e-06		1.99e-08	1.17e-07
Affx-110731981	6B	625318700			1.34e-06						2.07e-07	1.29e-06		1.67e-08	1.02e-07
Affx-109101658	6B	625414160			1.34e-06						2.61e-07	1.57e-06		2.8e-08	1.54e-07
Affx-109483133	6B	625803433									1.17e-07	8.46e-07		1.17e-08	7.75e-08
Affx-110130041	6B	625877155									1.17e-07	8.46e-07		1.17e-08	7.75e-08
Affx-109710641	6B	626588987									1.17e-07	8.46e-07		1.17e-08	7.75e-08
Affx-110739812	6B	626608920									1.17e-07	8.46e-07		1.17e-08	7.75e-08
Affx-108887217	6B	630032518									1.17e-07	8.46e-07		1.17e-08	7.75e-08
Affx-109338383	6B	630830061			5.68e-07			1.32e-06			3.41e-08	3.09e-07		1.04e-09	1.19e-08
Affx-110381963	6B	632441017			1.65e-08	1.01e-07		3.41e-07	1.07e-06		5.69e-10	1.29e-08		1.57e-11	5.34e-10
Affx-110803897	6B	653057372	qHA6B.3											1.55e-07	6.12e-07
Affx-109695303	6B	653107366												1.1e-07	4.64e-07
Affx-110719185	6B	654602749												1.1e-07	4.64e-07
Affx-88438243	6B	654635756												1.1e-07	4.64e-07
Affx-110060419	6B	656192106												1.13e-07	4.75e-07
Affx-108864566	6B	656290546												1.13e-07	4.75e-07
Affx-108935609	6B	656566863												1.14e-06
Affx-109528599	6B	656594620												1.14e-06
Affx-109958031	6B	656874525												7.11e-07
Affx-109319496	6B	657280662												1.03e-06
Affx-109523913	6B	657406347												1.14e-06
Affx-110750546	6B	657649646												1.03e-06
Affx-111741368	6B	658736053			1.63e-08	1e-07		4.67e-10	6e-09		1.54e-09	3.67e-08		8.13e-13	6.64e-11
Affx-88489387	6B	658833342			1.06e-08	7.17e-08		5.07e-10	6.56e-09		2.97e-09	6.21e-08		9.73e-13	7.52e-11
Affx-88551147	6B	659576854			7.87e-08	3.53e-07		4.05e-09	3.06e-08		6.92e-09	1.07e-07		1.04e-11	3.99e-10
Affx-108936361	6B	659920570			7.87e-08	3.53e-07		4.05e-09	3.06e-08		6.92e-09	1.07e-07		1.04e-11	3.99e-10
Affx-111526283	6B	659952927			8.4e-08	3.72e-07		1.04e-08	6.09e-08		6.29e-09	9.05e-08		1.63e-11	5.49e-10
Affx-108938136	6B	661251079			8.4e-08	3.72e-07		1.04e-08	6.09e-08		6.29e-09	9.05e-08		1.63e-11	5.49e-10
Affx-108938428	6B	662451209			5.12e-07						1.35e-07	9.88e-07		2.12e-09	2.05e-08
Affx-111755936	6D	437620622	qHA6D.1								3.91e-08	2.91e-07		7.08e-09	5.21e-08
Affx-111382782	6D	470087780	qHA6D.2											2.13e-07	7.96e-07
Affx-110889840	6D	470962628												1.08e-06
Affx-111945557	7A	28011146	qHA7A.1								1.11e-06			2.92e-07	1.03e-06
Affx-110982246	7A	28049803									1.2e-06			6.01e-07
Affx-110618564	7A	28415422									7.01e-07			8.99e-07
Affx-108997657	7A	303967631	qHA7A.2											3.74e-07	1.26e-06
Affx-109774363	7A	317513515												4.98e-07	1.6e-06
Affx-110944600	7A	320989106												3.73e-07	1.26e-06
Affx-111200987	7A	327746380												5.09e-07
Affx-111893628	7A	331893825												3.73e-07	1.26e-06
Affx-110064104	7A	339132775												1.28e-06
Affx-111045377	7A	348718818	qHA7A.3											3.73e-07	1.26e-06
Affx-109873672	7A	375868838	qHA7A.4											4.54e-07	1.48e-06
Affx-111681860	7A	383199792												5.09e-07
Affx-110254648	7A	395380403	qHA7A.5											8.84e-07
Affx-111920828	7A	414545834												7.3e-07
Affx-108902675	7A	441837287	qHA7A.6											3.32e-07	1.14e-06
Affx-111319587	7A	446172772												6.55e-07
Affx-88801658	7B	134559833	qHA7B.1											1.44e-06
Affx-111546444	7B	134693456												1.44e-06
Affx-109119769	7B	134816538												1.44e-06
Affx-110405489	7B	135071437												1.44e-06
Affx-111350225	7B	135396261												1.44e-06
Affx-109612785	7B	135487651												1.44e-06
Affx-110156430	7B	135518446												1.44e-06
Affx-111797998	7B	135576110												1.44e-06
Affx-108983295	7B	135584138												1.44e-06
Affx-108977126	7B	135773076												1.44e-06
Affx-88757639	7B	135994359												1.44e-06
Affx-109039949	7B	136049502												1.44e-06
Affx-110596047	7B	136215205												1.44e-06
Affx-110808354	7B	136357262												1.44e-06
Affx-109340177	7B	136404360												1.37e-06
Affx-88538627	7B	136548807												1.17e-06
Affx-109267088	7B	136614993												1.44e-06
Affx-111635923	7B	136889536												3.59e-07	1.22e-06
Affx-92311499	7B	137229084												1.44e-06
Affx-110431431	7B	137367909												1.44e-06
Affx-88411755	7B	137452944												1.44e-06
Affx-88470270	7B	137466997												1.44e-06
Affx-109953515	7B	137788944												1.44e-06
Affx-88712031	7B	605955822	qHA7B.2											5.37e-07
Affx-109875892	7B	634296992									5.08e-08	1.65e-07		1.72e-08	1.04e-07
Affx-109475205	7B	634386914									5.08e-08	1.65e-07		1.72e-08	1.04e-07
Affx-110752571	7B	634569700									4.86e-09	2.61e-08		1.26e-08	8.18e-08
Affx-110887993	7B	634871855									4.86e-09	2.61e-08		1.26e-08	8.18e-08
Affx-110094224	7B	635000643									4.86e-09	2.61e-08		1.26e-08	8.18e-08
Affx-110646254	7B	635019692									4.86e-09	2.61e-08		1.26e-08	8.18e-08
Affx-111036650	7D	174140962	qHA7D		1.53e-06									3.94e-07	1.32e-06
Affx-111581811	1B	338002884	qSV1B								7.78e-07
Affx-111314446	1B	338226412									5.36e-07
Affx-109797470	1B	338428325									1.09e-06
Affx-109827565	1B	339581715									3.25e-08	1.73e-07
Affx-109312412	1B	340327296									5.7e-07
Affx-110363122	1B	343249187									6.82e-07
Affx-110713219	1D	114133690	qSV1D							7.47e-06
Affx-109255728	2A	750224570	qSV2A							5.98e-08
Affx-110799594	2B	105477984	qSV2B								1.02e-06
Affx-110982092	2D	155972481	qSV2D.1				1.4e-07
Affx-109270483	2D	241341358	qSV2D.2				6.92e-09
Affx-109638707	2D	489715115	qSV2D.3								1.71e-07	6.64e-07		2.27e-07	8.36e-07
Affx-109153716	4B	649579021	qSV4B								5.43e-07
Affx-108906113	4B	651974314								2.63e-07
Affx-110906918	4B	658659028						8.31e-07			5.37e-07
Affx-110464416	4B	658683929						8.31e-07			5.37e-07
Affx-111282396	4B	658769852						6.36e-07			3.86e-07	1.29e-06		1.53e-06
Affx-109286698	4B	658776857						8.31e-07			5.37e-07
Affx-109730117	4B	658787586						8.31e-07			5.37e-07
Affx-110554603	4B	658822514						8.31e-07			5.37e-07
Affx-111645001	4B	658985211						1.19e-07	4.95e-07		4.05e-07	1.35e-06		8.31e-07
Affx-111783645	4B	658988957						8.31e-07			5.37e-07
Affx-111935993	4B	659069263						1e-07	4.3e-07		3.08e-07	1.08e-06		8.36e-07
Affx-88566185	4B	659153083						8.31e-07			5.37e-07
Affx-88631051	4B	659160087						8.31e-07			5.37e-07
Affx-111531698	5A	523610747	qSV5A								1.33e-06
Affx-109635326	5B	712402093	qSV5B								1.1e-06
Affx-88568297	6B	613351172	qSV6B.1					9.96e-07			1.56e-09	1.62e-08		1.14e-07	4.77e-07
Affx-110624950	6B	613472297									2.3e-09	2.18e-08		1.17e-07	4.86e-07
Affx-109482992	6B	613572805						9.96e-07			1.56e-09	1.62e-08		1.14e-07	4.77e-07
Affx-110068341	6B	614124551						9.96e-07			1.56e-09	1.62e-08		1.14e-07	4.77e-07
Affx-111481609	6B	614699875						9.96e-07			1.56e-09	1.62e-08		1.14e-07	4.77e-07
Affx-111905049	6B	615161867						9.96e-07			1.56e-09	1.62e-08		1.14e-07	4.77e-07
Affx-111621315	6B	615387859						9.96e-07			1.56e-09	1.62e-08		1.14e-07	4.77e-07
Affx-110492977	6B	615933121						9.96e-07			1.56e-09	1.62e-08		1.14e-07	4.77e-07
Affx-110487591	6B	616244120						9.96e-07			1.56e-09	1.62e-08		1.14e-07	4.77e-07
Affx-110660697	6B	624015752						9.96e-07			1.56e-09	1.62e-08		1.14e-07	4.77e-07
Affx-88567189	6B	624497030						9.96e-07			1.56e-09	1.62e-08		1.14e-07	4.77e-07
Affx-88785545	6B	624802486									2.21e-08	1.28e-07		1.46e-06
Affx-109388114	6B	624962211									2.21e-08	1.28e-07		1.46e-06
Affx-110624350	6B	625007429									6.13e-08	2.89e-07
Affx-110731981	6B	625318700									2.84e-08	1.56e-07		1.39e-06
Affx-109101658	6B	625414160									7.73e-08	3.48e-07
Affx-109483133	6B	625803433									2.21e-08	1.28e-07		1.46e-06
Affx-110130041	6B	625877155									2.21e-08	1.28e-07		1.46e-06
Affx-109710641	6B	626588987									2.21e-08	1.28e-07		1.46e-06
Affx-110739812	6B	626608920									2.21e-08	1.28e-07		1.46e-06
Affx-108887217	6B	630032518									2.21e-08	1.28e-07		1.46e-06
Affx-109338383	6B	630830061									6.98e-09	5.16e-08		4.49e-07	1.47e-06
Affx-110381963	6B	632441017						1.18e-06			2.86e-09	2.58e-08		1.45e-07	5.8e-07
Affx-111741368	6B	658736053	qSV6B.2					1.46e-07	5.83e-07
Affx-88489387	6B	658833342						2.4e-07	8.76e-07
Affx-88551147	6B	659576854						4.99e-07	1.6e-06
Affx-108936361	6B	659920570						4.99e-07	1.6e-06
Affx-111526283	6B	659952927						9.26e-07
Affx-108938136	6B	661251079						9.26e-07
Affx-111755936	6D	437620622	qSV6D.1								1.47e-08	9.23e-08		6.02e-07
Affx-111382782	6D	470087780	qSV6D.2					7.72e-07			3.68e-07	1.25e-06
Affx-88386320	6D	470094632						1.57e-06			1.07e-06
Affx-109232091	6D	470357016						1.57e-06			1.07e-06
Affx-88680763	6D	470381523						1.57e-06			1.07e-06
Affx-109533036	6D	470476371						1.57e-06			1.07e-06
Affx-111502670	6D	470546576						1.57e-06			1.07e-06
Affx-111132001	6D	470685486						1.57e-06			1.07e-06
Affx-88539269	6D	470864026						1.57e-06			1.07e-06
Affx-109505272	6D	470883842						1.57e-06			1.07e-06
Affx-111529003	6D	470938538						1.57e-06			1.07e-06
Affx-109877591	6D	470942156						1.57e-06			1.07e-06
Affx-110982246	7A	28049803	qSV7A								1.41e-07	5.67e-07
Affx-110618564	7A	28415422									6.99e-08	3.21e-07
Affx-88374279	7A	28603207									4.47e-07	1.46e-06
Affx-110386631	7B	132108564	qSV7B.1								1.66e-07	6.47e-07
Affx-109007771	7B	132218919									1.66e-07	6.47e-07
Affx-111417725	7B	133251429									1.66e-07	6.47e-07
Affx-110717632	7B	133788633									2.05e-07	7.7e-07
Affx-88712031	7B	605955822	qSV7B.2											7.31e-07
Affx-109875892	7B	634296992									1.15e-06
Affx-109475205	7B	634386914									1.15e-06
Affx-110752571	7B	634569700									7.82e-08	3.51e-07
Affx-110887993	7B	634871855									7.82e-08	3.51e-07
Affx-110094224	7B	635000643									7.82e-08	3.51e-07
Affx-110646254	7B	635019692									7.82e-08	3.51e-07
Affx-111036650	7D	174140962	qSV7D								1.16e-07	4.85e-07

## Sheet: GC
Table S2.2 Significant SNP for gluten content in different environments identified by GWAS
SNP name	Chromosome	Position	QTL	HJHQ			LH			WLTQQ			BLUP
				FarmCPU	GLM	MLM	FarmCPU	GLM	MLM	FarmCPU	GLM	MLM	FarmCPU	GLM	MLM
				P value	P value	P value	P value	P value	P value	P value	P value	P value	P value	P value	P value
Affx-111767006	2B	31118199	qGC2B.1	5.93e-05
Affx-109519959	2B	31418129		5.93e-05
Affx-111472438	2B	723962196	qGC2B.2							3.43e-05	1.95e-05		6.72e-05
Affx-109061076	2B	731601932								1.48e-05	9.17e-06	1.89e-05
Affx-111998281	2D	381880185	qGC2D.1							9.18e-06	9.3e-06	1.9e-05
Affx-109643287	2D	383392816								2.75e-05	2.71e-05
Affx-109013026	2D	383553293								6.56e-05
Affx-111030409	2D	387562470								1.24e-05	1.2e-05	2.37e-05
Affx-110818526	2D	391088032								1.52e-05	1.35e-05	2.64e-05
Affx-111615240	2D	391281094								1.91e-05	1.92e-05
Affx-111550232	2D	415244662	qGC2D.2							9.02e-05
Affx-109849942	3B	668891822	qGC3B							9.06e-05
Affx-111028154	3D	501056082	qGC3D							5.89e-05
Affx-110502762	5A	479282622	qGC5A	1.33e-06	1.22e-06	3.37e-06							6.78e-07	5.16e-07	1.65e-06
Affx-109736812	5A	479307507		1.33e-06	1.22e-06	3.37e-06							6.78e-07	5.16e-07	1.65e-06
Affx-111989348	5A	479325103		1.34e-06	1.3e-06	3.56e-06							1.27e-06	1.03e-06	2.93e-06
Affx-92820032	6A	18713168	qGC6A.1	7.04e-05
Affx-109184187	6A	22630393		3.83e-05
Affx-88703758	6A	105181270	qGC6A.2	9.43e-05
Affx-111466411	6B	217680379	qGC6B.1	8.67e-05
Affx-109734267	6B	218260405		5.78e-05
Affx-110449095	6B	223399864		5.78e-05
Affx-109630378	6B	225177814		5e-05
Affx-109794925	6B	226390965		2.92e-05	2.16e-05
Affx-109826713	6B	228249987		6.07e-05
Affx-110905373	6B	229546174		7.62e-05
Affx-111318122	6B	231347217		7.62e-05
Affx-111237286	6B	231573850		7.62e-05
Affx-109759921	6B	232786781		3.66e-05	2.56e-05
Affx-110732859	6B	235922116		5.53e-05
Affx-109399670	6B	443671528	qGC6B.2	1.26e-05	7.4e-06	1.57e-05							8.09e-05
Affx-110517092	6B	461416828	qGC6B.3	9.08e-05
Affx-109283283	6D	438928597	qGC6D	3.59e-05	2.82e-05
Affx-111025650	7A	40668087	qGC7A.1	8.66e-06	6.88e-06	1.47e-05
Affx-110041372	7A	603948191	qGC7A.2	8.36e-05

## Sheet: BV
Table S2.3 Significant SNP for baking value in different environments identified by GWAS
SNP name	Chromosome	Position	QTL	HJHQ			LH			WLTQQ			BLUP
				FarmCPU	GLM	MLM	FarmCPU	GLM	MLM	FarmCPU	GLM	MLM	FarmCPU	GLM	MLM
				P value	P value	P value	P value	P value	P value	P value	P value	P value	P value	P value	P value
Affx-110268258	1B	656855154	qBV1B							1.05e-05	5.74e-06	1.41e-05
Affx-88722941	2D	419865085	qBV2D.1							2.78e-05	1.21e-05	2.65e-05
Affx-110578395	2D	481592235	qBV2D.2							2.43e-05	2.44e-05
Affx-109638707	2D	489715115								1.91e-05	2.52e-05		6.87e-06	7.43e-06	1.57e-05
Affx-111700456	3D	137888921	qBV3D.1							2.58e-05
Affx-92277730	3D	571362199	qBV3D.2										1.56e-05	2.16e-05
Affx-92735425	3D	571493682									3.14e-05		1.94e-05	2.79e-05
Affx-88603031	3D	572830191								9.8e-06	9.03e-06	1.78e-05	1.33e-05	1.93e-05
Affx-111719969	4A	174391737	qBV4A								3.05e-05
Affx-88667201	4B	479405842	qBV4B.1							1.7e-05	1.63e-05	2.96e-05
Affx-111282396	4B	658769852	qBV4B.2				2.21e-05
Affx-111645001	4B	658985211					1.06e-05	1.22e-05	2.42e-05
Affx-111935993	4B	659069263					9.47e-06	1.42e-05	2.76e-05
Affx-110360842	4D	47319858	qBV4D				1.48e-05	1.59e-05	3.04e-05				1.47e-05	1.99e-05
Affx-110502762	5A	479282622	qBV5A										2.37e-05	2.65e-05
Affx-109736812	5A	479307507											2.37e-05	2.65e-05
Affx-92452824	5D	547502682	qBV5D				1.66e-05	2.16e-05					2.29e-05
Affx-92625536	5D	547504960					1.66e-05	2.16e-05					2.29e-05
Affx-111209028	5D	547508599					2.2e-05	2.55e-05					1.92e-05	2.55e-05
Affx-108938283	5D	547519725					2.45e-05	2.52e-05					2.34e-05	3.19e-05
Affx-92533779	5D	547527270					2.2e-05	2.21e-05					1.92e-05	2.55e-05
Affx-109131257	5D	547558003											2.95e-05
Affx-111485355	5D	547563366					1.41e-05	1.72e-05					1.4e-05	2.22e-05
Affx-110710905	5D	547690206					2.2e-05	2.21e-05					1.92e-05	2.55e-05
Affx-92784521	5D	547709624					6.93e-06	9.46e-06	1.93e-05				7.06e-06	1.21e-05	2.39e-05
Affx-111886009	5D	547829960					2.45e-05	2.52e-05					2.34e-05	3.19e-05
Affx-109316613	5D	547881554					2.2e-05	2.21e-05					1.92e-05	2.55e-05
Affx-109575706	5D	547884860					2.1e-05	1.54e-05	2.95e-05				1.67e-05	1.66e-05	3.15e-05
Affx-110453090	5D	547892375					1.74e-05	1.5e-05	2.89e-05				3e-05
Affx-111913626	5D	547895686					2.2e-05	2.21e-05					1.92e-05	2.55e-05
Affx-111604354	5D	547897035					1.49e-05	1.9e-05					1.89e-05	3.1e-05
Affx-108983326	5D	547924457					2.07e-05	2e-05					2.09e-05	2.58e-05
Affx-111587965	5D	548000042					1.3e-05	1.37e-05					1.18e-05	1.56e-05
Affx-111844209	5D	548022662					2.72e-05	3.06e-05
Affx-109467178	5D	548041700					1.47e-05	1.59e-05	3.04e-05				1.48e-05	1.99e-05
Affx-111946839	5D	548350917					2.28e-05	2.48e-05					1.84e-05	2.37e-05
Affx-109843224	5D	548377711					1.3e-05	1.37e-05	2.67e-05				1.18e-05	1.56e-05	2.99e-05
Affx-109045368	5D	548458598					1.3e-05	1.37e-05	2.67e-05				1.18e-05	1.56e-05	2.99e-05
Affx-111164669	5D	548968743					2.98e-05	2.18e-05
Affx-110308755	5D	549016800					1.84e-05	1.27e-05	2.49e-05				1.64e-05	1.43e-05	2.77e-05
Affx-110753049	5D	549492496						3.02e-05
Affx-88568297	6B	613351172	qBV6B.1							1.98e-05	1.52e-05	3.07e-05
Affx-110624950	6B	613472297								2.17e-05	1.86e-05
Affx-109482992	6B	613572805								1.98e-05	1.52e-05	3.07e-05
Affx-110068341	6B	614124551								1.98e-05	1.52e-05	3.07e-05
Affx-111481609	6B	614699875								1.98e-05	1.52e-05	3.07e-05
Affx-111905049	6B	615161867								1.98e-05	1.52e-05	3.07e-05
Affx-111621315	6B	615387859								1.98e-05	1.52e-05	3.07e-05
Affx-110492977	6B	615933121								1.98e-05	1.52e-05	3.07e-05
Affx-110487591	6B	616244120								1.98e-05	1.52e-05	3.07e-05
Affx-110660697	6B	624015752								1.98e-05	1.52e-05	3.07e-05
Affx-88567189	6B	624497030								1.98e-05	1.52e-05	3.07e-05
Affx-110381963	6B	632441017								1.8e-05	1.54e-05	3.03e-05	1.47e-05	2.09e-05
Affx-111741368	6B	658736053	qBV6B.2				4.05e-07	8.38e-07	2.47e-06	2.28e-05	1.37e-05	2.98e-05	3.8e-07	3.72e-07	1.26e-06
Affx-88489387	6B	658833342					4.4e-07	7.81e-07	2.33e-06		2.05e-05		4.02e-07	3.71e-07	1.25e-06
Affx-88551147	6B	659576854					3.79e-06	7.89e-06	1.65e-05				6.33e-06	8.04e-06	1.68e-05
Affx-108936361	6B	659920570					3.79e-06	7.89e-06	1.65e-05				6.33e-06	8.04e-06	1.68e-05
Affx-111526283	6B	659952927					3.92e-06	9.99e-06	2.03e-05	2.97e-05	3.03e-05		2.17e-06	4.08e-06	9.39e-06
Affx-108938136	6B	661251079					3.92e-06	9.99e-06	2.03e-05	2.97e-05	3.03e-05		2.17e-06	4.08e-06	9.39e-06
Affx-108938428	6B	662451209											1.71e-05	2.77e-05
Affx-111755936	6D	437620622	qBV6D				6.91e-06	2.7e-05		1.77e-06	1.83e-06	4.75e-06	4.18e-07	1.01e-06	2.87e-06
Affx-88712031	7B	605955822	qBV7B.1								1.46e-05	3.17e-05	2.67e-05	2.02e-05
Affx-88708456	7B	634291916	qBV7B.2							1.72e-05
Affx-109875892	7B	634296992					1.05e-05	2.68e-05		2.78e-05	3.06e-05		4.9e-06	8.5e-06	1.76e-05
Affx-109475205	7B	634386914					1.05e-05	2.68e-05		2.78e-05	3.06e-05		4.9e-06	8.5e-06	1.76e-05
Affx-110752571	7B	634569700											1.44e-05
Affx-110887993	7B	634871855											1.44e-05
Affx-110094224	7B	635000643											1.44e-05
Affx-110646254	7B	635019692											1.44e-05
Affx-109510439	7D	515224099	qBV7D										3.24e-05

## Sheet: HA
Table S2.4 Significant SNP for grain hardness in different environments identified by GWAS
SNP name	Chromosome	Position	QTL	HJHQ			LH			WLTQQ			BLUP
				FarmCPU	GLM	MLM	FarmCPU	GLM	MLM	FarmCPU	GLM	MLM	FarmCPU	GLM	MLM
				P value	P value	P value	P value	P value	P value	P value	P value	P value	P value	P value	P value
Affx-109771372	1A	54498547	qHA1A.1								1.57e-06			1.06e-06
Affx-109038026	1A	301162316	qHA1A.2		8.82e-07
Affx-111821382	1A	301178854			8.19e-07
Affx-110630714	1A	301211407			8.19e-07
Affx-109196962	1A	301224271			8.19e-07
Affx-111358232	1A	301487277			8.19e-07
Affx-109270981	1A	301629723			8.19e-07
Affx-92577004	1A	301857698			8.19e-07
Affx-111392245	1A	301891708			8.19e-07
Affx-109090656	1A	301897481			8.19e-07
Affx-109256989	1A	301900920			8.19e-07
Affx-111906993	1A	301903267			1.13e-06
Affx-111960154	1A	302198990			8.19e-07
Affx-109239281	1A	302218996			9.09e-07
Affx-110831588	1A	302261391			8.19e-07
Affx-111742559	1A	302625821			8.19e-07
Affx-109343584	1A	302897112			8.19e-07
Affx-111777606	1A	302905054			8.19e-07
Affx-111064361	1A	302957051			8.19e-07
Affx-110248555	1A	302971689			8.19e-07
Affx-111553188	1A	303347851			7.98e-07
Affx-111194406	1A	303408476			8.1e-07
Affx-109307440	1A	303727468			8.19e-07
Affx-88364991	1A	303851609			8.19e-07
Affx-108925088	1A	303913839			8.19e-07
Affx-110379194	1A	304020506			8.19e-07
Affx-111856897	1A	304177126			8.19e-07
Affx-109496046	1A	304619033			8.19e-07
Affx-109891770	1A	304849708			8.19e-07
Affx-109875848	1A	304992002			8.19e-07
Affx-88364300	1A	304999185			8.19e-07
Affx-92645323	1A	305003294			8.19e-07
Affx-111596093	1A	305112354			8.19e-07
Affx-88726607	1A	305366304			8.19e-07
Affx-110659594	1A	305404584			1.13e-06
Affx-110318627	1A	305510776			8.19e-07
Affx-109330898	1A	305604321			9.09e-07
Affx-111681769	1A	305610490			8.19e-07
Affx-109593873	1A	306103781			8.19e-07
Affx-108903719	1A	306615654			8.19e-07
Affx-109244807	1A	307030144			8.19e-07
Affx-88585277	1A	307034390			9.09e-07
Affx-88380874	1A	307037391			8.19e-07
Affx-110706230	1A	307060255			8.19e-07
Affx-110501230	1A	307241252			8.19e-07
Affx-109415677	1A	307484630			8.85e-07
Affx-109290107	1A	307683571			8.19e-07
Affx-110135156	1A	307689374			8.19e-07
Affx-109610528	1A	307699290			8.19e-07
Affx-88778870	1A	307703199			8.19e-07
Affx-109714761	1A	307719008			8.19e-07
Affx-109167527	1A	308361191			6.9e-07
Affx-108953270	1A	308390322			8.19e-07
Affx-88388513	1A	308435120			7.98e-07
Affx-111775071	1A	308574673			8.19e-07
Affx-109038721	1A	308577946			8.19e-07
Affx-110506199	1A	308586525			7.98e-07
Affx-109235147	1A	308808799			8.19e-07
Affx-88655149	1B	336204650	qHA1B.1								6.32e-07			4.91e-07	1.58e-06
Affx-111907680	1B	336269121									7.93e-08	4.7e-07		9.45e-08	4.09e-07
Affx-111581811	1B	338002884									2.32e-07	1.04e-06		1.04e-07	4.43e-07
Affx-111314446	1B	338226412									1.14e-07	5.68e-07		3.97e-08	2.04e-07
Affx-109797470	1B	338428325									5.06e-07			2.11e-07	7.86e-07
Affx-109827565	1B	339581715									3.12e-08	1.89e-07		1.04e-08	7.03e-08
Affx-109312412	1B	340327296									2.58e-07	1.11e-06		9.88e-08	4.24e-07
Affx-110363122	1B	343249187									1.09e-06			1.17e-06
Affx-110268258	1B	656855154	qHA1B.2								1.08e-06
Affx-111217119	1D	240888910	qHA1D		8.19e-07
Affx-109329377	2B	30549242	qHA2B.1											9.71e-07
Affx-110799594	2B	105477984	qHA2B.2								1.15e-06			1.85e-07	7.07e-07
Affx-110741338	2B	749067388	qHA2B.3											5.3e-07
Affx-110469844	2B	749289653												5.3e-07
Affx-88520727	2D	34231554	qHA2D.1								3.49e-08	3.01e-07		6.87e-09	5.09e-08
Affx-109638707	2D	489715115	qHA2D.2								1.47e-06
Affx-111700456	3D	137888921	qHA3D.1								1.11e-06
Affx-92277730	3D	571362199	qHA3D.2					3.68e-07	1.05e-06		4.6e-08	1.97e-07		2.05e-09	1.99e-08
Affx-92735425	3D	571493682						2.25e-07	6.88e-07		4.33e-08	1.88e-07		2.42e-09	2.27e-08
Affx-88603031	3D	572830191						1.74e-07	5.65e-07		1.41e-08	8.55e-08		1.23e-09	1.35e-08
Affx-110612607	4A	11985991	qHA4A											7.51e-07
Affx-109944260	4B	465746296	qHA4B.1								7.25e-07			1.37e-06
Affx-109841286	4B	465900369									1.33e-06
Affx-109214462	4B	477239477	qHA4B.2								1.55e-06
Affx-88667201	4B	479405842									9.53e-08	4.17e-07		7.05e-07
Affx-111554515	4B	479415717									1.67e-07	4.55e-07		1.06e-06
Affx-88495978	4B	480592448									7.41e-07
Affx-88373180	4B	480597474									4.05e-07	9.89e-07
Affx-111064010	4B	480684318									7.41e-07
Affx-88805821	4B	480690322									7.41e-07
Affx-109066984	4B	480827714									7.41e-07
Affx-110490700	4B	480833107									7.41e-07
Affx-110885001	4B	480836143									9.17e-07
Affx-109801902	4B	480845555									7.41e-07
Affx-110973383	4B	480918302									7.41e-07
Affx-109286369	4B	480926079									7.41e-07
Affx-109497797	4B	480950891									7.41e-07
Affx-109348153	4B	481101554									6.4e-07	1.51e-06
Affx-109612564	4B	481189214									7.41e-07
Affx-110341345	4B	481203296									7.41e-07
Affx-109668094	4B	481214070									1.51e-06
Affx-109676767	4B	481216303									2.62e-07	7.03e-07		1.57e-06
Affx-109775549	4B	481222938									4.17e-07	1.09e-06
Affx-88488276	4B	481237159									7.41e-07
Affx-109978913	4B	481242732									6.83e-07	1.54e-06
Affx-111449682	4B	481356385									7.15e-07	1.55e-06
Affx-110226630	4B	481521146									7.41e-07
Affx-109890964	4B	481579715									8.03e-07
Affx-88653553	4B	481599226									6.09e-07	1.37e-06
Affx-111498312	4B	481604442									7.41e-07
Affx-88393875	4B	481638297									6.83e-07	1.54e-06
Affx-110318717	4B	481803752									7.41e-07
Affx-110906918	4B	658659028	qHA4B.3					1.16e-06						4.71e-08	2.33e-07
Affx-110464416	4B	658683929						1.16e-06						4.71e-08	2.33e-07
Affx-111282396	4B	658769852						7.56e-07						2.64e-08	1.47e-07
Affx-109286698	4B	658776857						1.16e-06						4.71e-08	2.33e-07
Affx-109730117	4B	658787586						1.16e-06						4.71e-08	2.33e-07
Affx-110554603	4B	658822514						1.16e-06						4.71e-08	2.33e-07
Affx-111645001	4B	658985211						1.18e-07	4.9e-07		6.95e-07			3.96e-09	3.32e-08
Affx-111783645	4B	658988957						1.16e-06						4.71e-08	2.33e-07
Affx-88549281	4B	659066723												4.41e-07	1.44e-06
Affx-111935993	4B	659069263						2.05e-07	7.42e-07		1.06e-06			9.3e-09	6.45e-08
Affx-88566185	4B	659153083						1.16e-06						4.71e-08	2.33e-07
Affx-88631051	4B	659160087						1.16e-06						4.71e-08	2.33e-07
Affx-110360842	4D	47319858	qHA4D					6.19e-07			4.03e-08	2.39e-07		4.26e-09	3.51e-08
Affx-109544028	5A	18838101	qHA5A.1											1.38e-06
Affx-109211134	5A	516642589	qHA5A.2											5.53e-07
Affx-111528231	5B	590530563	qHA5B.1											5.73e-08	2.73e-07
Affx-110253061	5B	681127703	qHA5B.2	1.19e-06
Affx-109635326	5B	712402093	qHA5B.3		1.12e-06									3.82e-07	1.28e-06
Affx-92452824	5D	547502682	qHA5D								2.32e-07	8.73e-07		5.3e-08	2.57e-07
Affx-92625536	5D	547504960									2.32e-07	8.73e-07		5.3e-08	2.57e-07
Affx-111209028	5D	547508599									1.35e-07	6.03e-07		2.87e-08	1.57e-07
Affx-108938283	5D	547519725									1.23e-07	5.44e-07		3.15e-08	1.69e-07
Affx-92533779	5D	547527270									1.35e-07	6.03e-07		2.87e-08	1.57e-07
Affx-111976104	5D	547547344												8.72e-07
Affx-109131257	5D	547558003									1.71e-07	7.29e-07		4.55e-08	2.27e-07
Affx-111485355	5D	547563366									1.94e-07	7.96e-07		3.36e-08	1.78e-07
Affx-110710905	5D	547690206									1.35e-07	6.03e-07		2.87e-08	1.57e-07
Affx-92784521	5D	547709624						8.04e-07			1.8e-07	7.11e-07		1.32e-08	8.49e-08
Affx-109339842	5D	547711797												6.13e-07
Affx-111886009	5D	547829960									1.23e-07	5.44e-07		3.15e-08	1.69e-07
Affx-109316613	5D	547881554									1.35e-07	6.03e-07		2.87e-08	1.57e-07
Affx-109575706	5D	547884860									4.9e-08	2.77e-07		1.35e-08	8.63e-08
Affx-110453090	5D	547892375						1.29e-06			1.18e-07	5.29e-07		2.49e-08	1.4e-07
Affx-111913626	5D	547895686									1.35e-07	6.03e-07		2.87e-08	1.57e-07
Affx-111604354	5D	547897035									2.57e-07	9.72e-07		4.86e-08	2.4e-07
Affx-108983326	5D	547924457									1.4e-07	6.54e-07		2.68e-08	1.49e-07
Affx-110703296	5D	547974390												4.3e-07	1.41e-06
Affx-111587965	5D	548000042						1e-06			4.35e-08	2.52e-07		3.72e-09	3.16e-08
Affx-111844209	5D	548022662									1.87e-07	8.15e-07		1.75e-08	1.06e-07
Affx-109467178	5D	548041700						6.19e-07			4.03e-08	2.39e-07		4.26e-09	3.51e-08
Affx-111946839	5D	548350917									5.56e-08	3.07e-07		6.14e-09	4.66e-08
Affx-109843224	5D	548377711						1e-06			4.35e-08	2.52e-07		3.72e-09	3.16e-08
Affx-109045368	5D	548458598						1e-06			4.35e-08	2.52e-07		3.72e-09	3.16e-08
Affx-110479400	5D	548475020						1.02e-06			3.09e-07	1.21e-06		1.83e-08	1.1e-07
Affx-109338887	5D	548487719									4.27e-07	1.56e-06		2.66e-08	1.48e-07
Affx-111164669	5D	548968743						5.67e-07			2.91e-07	1.15e-06		1.4e-08	8.91e-08
Affx-110948475	5D	548985376						1.02e-06			3.09e-07	1.21e-06		1.83e-08	1.1e-07
Affx-110308755	5D	549016800						4.3e-07	1.45e-06		9.26e-08	4.32e-07		3.51e-09	3.02e-08
Affx-110753049	5D	549492496									3.4e-07	1.29e-06		1.66e-08	1.02e-07
Affx-110782972	5D	549569470									4.75e-07			3.64e-08	1.9e-07
Affx-108944365	5D	549638211									1.61e-06			2.28e-07	8.4e-07
Affx-111913354	5D	549774594									3.66e-07	1.19e-06		7.49e-08	3.39e-07
Affx-109805677	5D	549984898									3.92e-07	1.33e-06		8.94e-08	3.92e-07
Affx-108904064	5D	550154693												1.43e-06
Affx-88462639	5D	550206088									7.58e-07			2.25e-07	8.32e-07
Affx-110400486	5D	550211080									7.58e-07			2.25e-07	8.32e-07
Affx-109776356	5D	550437961												6.28e-07
Affx-88383158	6B	577471471	qHA6B.1											4e-07	1.33e-06
Affx-88568297	6B	613351172	qHA6B.2		8.76e-08	3.85e-07					1.57e-09	2.89e-08		1.64e-10	2.97e-09
Affx-110624950	6B	613472297			5.65e-08	2.71e-07					3.57e-09	5.17e-08		2.87e-10	4.49e-09
Affx-109482992	6B	613572805			8.76e-08	3.85e-07					1.57e-09	2.89e-08		1.64e-10	2.97e-09
Affx-110068341	6B	614124551			8.76e-08	3.85e-07					1.57e-09	2.89e-08		1.64e-10	2.97e-09
Affx-111481609	6B	614699875			8.76e-08	3.85e-07					1.57e-09	2.89e-08		1.64e-10	2.97e-09
Affx-111905049	6B	615161867			8.76e-08	3.85e-07					1.57e-09	2.89e-08		1.64e-10	2.97e-09
Affx-111621315	6B	615387859			8.76e-08	3.85e-07					1.57e-09	2.89e-08		1.64e-10	2.97e-09
Affx-110492977	6B	615933121			8.76e-08	3.85e-07					1.57e-09	2.89e-08		1.64e-10	2.97e-09
Affx-110487591	6B	616244120			8.76e-08	3.85e-07					1.57e-09	2.89e-08		1.64e-10	2.97e-09
Affx-110660697	6B	624015752			8.76e-08	3.85e-07					1.57e-09	2.89e-08		1.64e-10	2.97e-09
Affx-88567189	6B	624497030			8.76e-08	3.85e-07					1.57e-09	2.89e-08		1.64e-10	2.97e-09
Affx-88785545	6B	624802486									1.17e-07	8.46e-07		1.17e-08	7.75e-08
Affx-109388114	6B	624962211									1.17e-07	8.46e-07		1.17e-08	7.75e-08
Affx-110624350	6B	625007429									1.48e-07	1.03e-06		1.99e-08	1.17e-07
Affx-110731981	6B	625318700			1.34e-06						2.07e-07	1.29e-06		1.67e-08	1.02e-07
Affx-109101658	6B	625414160			1.34e-06						2.61e-07	1.57e-06		2.8e-08	1.54e-07
Affx-109483133	6B	625803433									1.17e-07	8.46e-07		1.17e-08	7.75e-08
Affx-110130041	6B	625877155									1.17e-07	8.46e-07		1.17e-08	7.75e-08
Affx-109710641	6B	626588987									1.17e-07	8.46e-07		1.17e-08	7.75e-08
Affx-110739812	6B	626608920									1.17e-07	8.46e-07		1.17e-08	7.75e-08
Affx-108887217	6B	630032518									1.17e-07	8.46e-07		1.17e-08	7.75e-08
Affx-109338383	6B	630830061			5.68e-07			1.32e-06			3.41e-08	3.09e-07		1.04e-09	1.19e-08
Affx-110381963	6B	632441017			1.65e-08	1.01e-07		3.41e-07	1.07e-06		5.69e-10	1.29e-08		1.57e-11	5.34e-10
Affx-110803897	6B	653057372	qHA6B.3											1.55e-07	6.12e-07
Affx-109695303	6B	653107366												1.1e-07	4.64e-07
Affx-110719185	6B	654602749												1.1e-07	4.64e-07
Affx-88438243	6B	654635756												1.1e-07	4.64e-07
Affx-110060419	6B	656192106												1.13e-07	4.75e-07
Affx-108864566	6B	656290546												1.13e-07	4.75e-07
Affx-108935609	6B	656566863												1.14e-06
Affx-109528599	6B	656594620												1.14e-06
Affx-109958031	6B	656874525												7.11e-07
Affx-109319496	6B	657280662												1.03e-06
Affx-109523913	6B	657406347												1.14e-06
Affx-110750546	6B	657649646												1.03e-06
Affx-111741368	6B	658736053			1.63e-08	1e-07		4.67e-10	6e-09		1.54e-09	3.67e-08		8.13e-13	6.64e-11
Affx-88489387	6B	658833342			1.06e-08	7.17e-08		5.07e-10	6.56e-09		2.97e-09	6.21e-08		9.73e-13	7.52e-11
Affx-88551147	6B	659576854			7.87e-08	3.53e-07		4.05e-09	3.06e-08		6.92e-09	1.07e-07		1.04e-11	3.99e-10
Affx-108936361	6B	659920570			7.87e-08	3.53e-07		4.05e-09	3.06e-08		6.92e-09	1.07e-07		1.04e-11	3.99e-10
Affx-111526283	6B	659952927			8.4e-08	3.72e-07		1.04e-08	6.09e-08		6.29e-09	9.05e-08		1.63e-11	5.49e-10
Affx-108938136	6B	661251079			8.4e-08	3.72e-07		1.04e-08	6.09e-08		6.29e-09	9.05e-08		1.63e-11	5.49e-10
Affx-108938428	6B	662451209			5.12e-07						1.35e-07	9.88e-07		2.12e-09	2.05e-08
Affx-111755936	6D	437620622	qHA6D.1								3.91e-08	2.91e-07		7.08e-09	5.21e-08
Affx-111382782	6D	470087780	qHA6D.2											2.13e-07	7.96e-07
Affx-110889840	6D	470962628												1.08e-06
Affx-111945557	7A	28011146	qHA7A.1								1.11e-06			2.92e-07	1.03e-06
Affx-110982246	7A	28049803									1.2e-06			6.01e-07
Affx-110618564	7A	28415422									7.01e-07			8.99e-07
Affx-108997657	7A	303967631	qHA7A.2											3.74e-07	1.26e-06
Affx-109774363	7A	317513515												4.98e-07	1.6e-06
Affx-110944600	7A	320989106												3.73e-07	1.26e-06
Affx-111200987	7A	327746380												5.09e-07
Affx-111893628	7A	331893825												3.73e-07	1.26e-06
Affx-110064104	7A	339132775												1.28e-06
Affx-111045377	7A	348718818	qHA7A.3											3.73e-07	1.26e-06
Affx-109873672	7A	375868838	qHA7A.4											4.54e-07	1.48e-06
Affx-111681860	7A	383199792												5.09e-07
Affx-110254648	7A	395380403	qHA7A.5											8.84e-07
Affx-111920828	7A	414545834												7.3e-07
Affx-108902675	7A	441837287	qHA7A.6											3.32e-07	1.14e-06
Affx-111319587	7A	446172772												6.55e-07
Affx-88801658	7B	134559833	qHA7B.1											1.44e-06
Affx-111546444	7B	134693456												1.44e-06
Affx-109119769	7B	134816538												1.44e-06
Affx-110405489	7B	135071437												1.44e-06
Affx-111350225	7B	135396261												1.44e-06
Affx-109612785	7B	135487651												1.44e-06
Affx-110156430	7B	135518446												1.44e-06
Affx-111797998	7B	135576110												1.44e-06
Affx-108983295	7B	135584138												1.44e-06
Affx-108977126	7B	135773076												1.44e-06
Affx-88757639	7B	135994359												1.44e-06
Affx-109039949	7B	136049502												1.44e-06
Affx-110596047	7B	136215205												1.44e-06
Affx-110808354	7B	136357262												1.44e-06
Affx-109340177	7B	136404360												1.37e-06
Affx-88538627	7B	136548807												1.17e-06
Affx-109267088	7B	136614993												1.44e-06
Affx-111635923	7B	136889536												3.59e-07	1.22e-06
Affx-92311499	7B	137229084												1.44e-06
Affx-110431431	7B	137367909												1.44e-06
Affx-88411755	7B	137452944												1.44e-06
Affx-88470270	7B	137466997												1.44e-06
Affx-109953515	7B	137788944												1.44e-06
Affx-88712031	7B	605955822	qHA7B.2											5.37e-07
Affx-109875892	7B	634296992									5.08e-08	1.65e-07		1.72e-08	1.04e-07
Affx-109475205	7B	634386914									5.08e-08	1.65e-07		1.72e-08	1.04e-07
Affx-110752571	7B	634569700									4.86e-09	2.61e-08		1.26e-08	8.18e-08
Affx-110887993	7B	634871855									4.86e-09	2.61e-08		1.26e-08	8.18e-08
Affx-110094224	7B	635000643									4.86e-09	2.61e-08		1.26e-08	8.18e-08
Affx-110646254	7B	635019692									4.86e-09	2.61e-08		1.26e-08	8.18e-08
Affx-111036650	7D	174140962	qHA7D		1.53e-06									3.94e-07	1.32e-06

## Sheet: SV
Table S2.5 Significant SNP for sedimentation in different environments identified by GWAS
SNP name	Chromosome	Position	QTL	HJHQ			LH			WLTQQ			BLUP
				FarmCPU	GLM	MLM	FarmCPU	GLM	MLM	FarmCPU	GLM	MLM	FarmCPU	GLM	MLM
				P value	P value	P value	P value	P value	P value	P value	P value	P value	P value	P value	P value
Affx-111581811	1B	338002884	qSV1B								7.78e-07
Affx-111314446	1B	338226412									5.36e-07
Affx-109797470	1B	338428325									1.09e-06
Affx-109827565	1B	339581715									3.25e-08	1.73e-07
Affx-109312412	1B	340327296									5.7e-07
Affx-110363122	1B	343249187									6.82e-07
Affx-110713219	1D	114133690	qSV1D							7.47e-06
Affx-109255728	2A	750224570	qSV2A							5.98e-08
Affx-110799594	2B	105477984	qSV2B								1.02e-06
Affx-110982092	2D	155972481	qSV2D.1				1.4e-07
Affx-109270483	2D	241341358	qSV2D.2				6.92e-09
Affx-109638707	2D	489715115	qSV2D.3								1.71e-07	6.64e-07		2.27e-07	8.36e-07
Affx-109153716	4B	649579021	qSV4B								5.43e-07
Affx-108906113	4B	651974314								2.63e-07
Affx-110906918	4B	658659028						8.31e-07			5.37e-07
Affx-110464416	4B	658683929						8.31e-07			5.37e-07
Affx-111282396	4B	658769852						6.36e-07			3.86e-07	1.29e-06		1.53e-06
Affx-109286698	4B	658776857						8.31e-07			5.37e-07
Affx-109730117	4B	658787586						8.31e-07			5.37e-07
Affx-110554603	4B	658822514						8.31e-07			5.37e-07
Affx-111645001	4B	658985211						1.19e-07	4.95e-07		4.05e-07	1.35e-06		8.31e-07
Affx-111783645	4B	658988957						8.31e-07			5.37e-07
Affx-111935993	4B	659069263						1e-07	4.3e-07		3.08e-07	1.08e-06		8.36e-07
Affx-88566185	4B	659153083						8.31e-07			5.37e-07
Affx-88631051	4B	659160087						8.31e-07			5.37e-07
Affx-111531698	5A	523610747	qSV5A								1.33e-06
Affx-109635326	5B	712402093	qSV5B								1.1e-06
Affx-88568297	6B	613351172	qSV6B.1					9.96e-07			1.56e-09	1.62e-08		1.14e-07	4.77e-07
Affx-110624950	6B	613472297									2.3e-09	2.18e-08		1.17e-07	4.86e-07
Affx-109482992	6B	613572805						9.96e-07			1.56e-09	1.62e-08		1.14e-07	4.77e-07
Affx-110068341	6B	614124551						9.96e-07			1.56e-09	1.62e-08		1.14e-07	4.77e-07
Affx-111481609	6B	614699875						9.96e-07			1.56e-09	1.62e-08		1.14e-07	4.77e-07
Affx-111905049	6B	615161867						9.96e-07			1.56e-09	1.62e-08		1.14e-07	4.77e-07
Affx-111621315	6B	615387859						9.96e-07			1.56e-09	1.62e-08		1.14e-07	4.77e-07
Affx-110492977	6B	615933121						9.96e-07			1.56e-09	1.62e-08		1.14e-07	4.77e-07
Affx-110487591	6B	616244120						9.96e-07			1.56e-09	1.62e-08		1.14e-07	4.77e-07
Affx-110660697	6B	624015752						9.96e-07			1.56e-09	1.62e-08		1.14e-07	4.77e-07
Affx-88567189	6B	624497030						9.96e-07			1.56e-09	1.62e-08		1.14e-07	4.77e-07
Affx-88785545	6B	624802486									2.21e-08	1.28e-07		1.46e-06
Affx-109388114	6B	624962211									2.21e-08	1.28e-07		1.46e-06
Affx-110624350	6B	625007429									6.13e-08	2.89e-07
Affx-110731981	6B	625318700									2.84e-08	1.56e-07		1.39e-06
Affx-109101658	6B	625414160									7.73e-08	3.48e-07
Affx-109483133	6B	625803433									2.21e-08	1.28e-07		1.46e-06
Affx-110130041	6B	625877155									2.21e-08	1.28e-07		1.46e-06
Affx-109710641	6B	626588987									2.21e-08	1.28e-07		1.46e-06
Affx-110739812	6B	626608920									2.21e-08	1.28e-07		1.46e-06
Affx-108887217	6B	630032518									2.21e-08	1.28e-07		1.46e-06
Affx-109338383	6B	630830061									6.98e-09	5.16e-08		4.49e-07	1.47e-06
Affx-110381963	6B	632441017						1.18e-06			2.86e-09	2.58e-08		1.45e-07	5.8e-07
Affx-111741368	6B	658736053	qSV6B.2					1.46e-07	5.83e-07
Affx-88489387	6B	658833342						2.4e-07	8.76e-07
Affx-88551147	6B	659576854						4.99e-07	1.6e-06
Affx-108936361	6B	659920570						4.99e-07	1.6e-06
Affx-111526283	6B	659952927						9.26e-07
Affx-108938136	6B	661251079						9.26e-07
Affx-111755936	6D	437620622	qSV6D.1								1.47e-08	9.23e-08		6.02e-07
Affx-111382782	6D	470087780	qSV6D.2					7.72e-07			3.68e-07	1.25e-06
Affx-88386320	6D	470094632						1.57e-06			1.07e-06
Affx-109232091	6D	470357016						1.57e-06			1.07e-06
Affx-88680763	6D	470381523						1.57e-06			1.07e-06
Affx-109533036	6D	470476371						1.57e-06			1.07e-06
Affx-111502670	6D	470546576						1.57e-06			1.07e-06
Affx-111132001	6D	470685486						1.57e-06			1.07e-06
Affx-88539269	6D	470864026						1.57e-06			1.07e-06
Affx-109505272	6D	470883842						1.57e-06			1.07e-06
Affx-111529003	6D	470938538						1.57e-06			1.07e-06
Affx-109877591	6D	470942156						1.57e-06			1.07e-06
Affx-110982246	7A	28049803	qSV7A								1.41e-07	5.67e-07
Affx-110618564	7A	28415422									6.99e-08	3.21e-07
Affx-88374279	7A	28603207									4.47e-07	1.46e-06
Affx-110386631	7B	132108564	qSV7B.1								1.66e-07	6.47e-07
Affx-109007771	7B	132218919									1.66e-07	6.47e-07
Affx-111417725	7B	133251429									1.66e-07	6.47e-07
Affx-110717632	7B	133788633									2.05e-07	7.7e-07
Affx-88712031	7B	605955822	qSV7B.2											7.31e-07
Affx-109875892	7B	634296992									1.15e-06
Affx-109475205	7B	634386914									1.15e-06
Affx-110752571	7B	634569700									7.82e-08	3.51e-07
Affx-110887993	7B	634871855									7.82e-08	3.51e-07
Affx-110094224	7B	635000643									7.82e-08	3.51e-07
Affx-110646254	7B	635019692									7.82e-08	3.51e-07
Affx-111036650	7D	174140962	qSV7D								1.16e-07	4.85e-07
