# Supplementary material for: Genome-Wide Association Study Reveals the Genetic Basis of Five Quality Traits in Chinese Wheat
Source: Front Plant Sci. 2022 Mar 3;13:835306. doi: 10.3389/fpls.2022.835306 (PMC8928432; doi:10.3389/fpls.2022.835306)
Supplement: Supplementary Table 3 — A total of 103 QTL composed of significant snp detected by GWAS. [file Table_3.XLSX]

## Sheet: Sheet1
Table S3 A total of 103 QTL composed of significant snp detected by GWAS
Trait	QTL	No.sig SNP	Chromosome	Region (Mb)	Environment (Model)
PC	qPC1A	68	1A	301.16-318.19	HJHQ (FarmCPU/GLM/MLM), BLUP (GLM)
PC	qPC1D.1	1	1D	21.91	HJHQ (FarmCPU/GLM/MLM)
PC	qPC1D.2	1	1D	240.89	HJHQ (FarmCPU/GLM/MLM)
PC	qPC2B	1	2B	723.96	HJHQ (FarmCPU/GLM/MLM)
PC	qPC2D	2	2D	481.59-487.31	HJHQ (FarmCPU)
PC	qPC5A.1	1	5A	71.4	HJHQ (GLM)
PC	qPC5A.2	1	5A	83.27	HJHQ (GLM)
PC	qPC5A.3	3	5A	479.28-479.32	HJHQ (FarmCPU/GLM/MLM), BLUP (FarmCPU/GLM/MLM)
PC	qPC5D	17	5D	547.51-549.02	HJHQ (FarmCPU/GLM/MLM)
PC	qPC6A.1	2	6A	105.18-107.21	HJHQ (FarmCPU/GLM/MLM)
PC	qPC6A.2	2	6A	148.25-148.52	HJHQ (FarmCPU/GLM/MLM)
PC	qPC6A.3	1	6A	171.46	HJHQ (FarmCPU/GLM)
PC	qPC6A.4	1	6A	196.82	HJHQ (FarmCPU/GLM/MLM)
PC	qPC6B	2	6B	658.74-658.83	HJHQ (FarmCPU/GLM/MLM)
PC	qPC6D	1	6D	437.62	HJHQ (FarmCPU)
PC	qPC7B	1	7B	605.96	HJHQ (FarmCPU)
GC	qGC2B.1	2	2B	311.19-314.18	HJHQ (FarmCPU)
GC	qGC2B.2	2	2B	723.96-731.60	WLTQQ (FarmCPU/GLM/MLM), BLUP (FarmCPU)
GC	qGC2D.1	6	2D	381.88-391.28	WLTQQ (FarmCPU/GLM/MLM)
GC	qGC2D.2	1	2D	415.24	WLTQQ (FarmCPU)
GC	qGC3B	1	3B	668.9	WLTQQ (FarmCPU)
GC	qGC3D	1	3D	501.06	WLTQQ (FarmCPU)
GC	qGC5A	3	5A	479.28-479.32	HJHQ (FarmCPU/GLM/MLM), BLUP (FarmCPU/GLM/MLM)
GC	qGC6A.1	2	6A	18.71-22.63	HJHQ (FarmCPU)
GC	qGC6A.2	1	6A	105.18	HJHQ (FarmCPU)
GC	qGC6B.1	11	6B	217.68-235.59	HJHQ (FarmCPU/GLM)
GC	qGC6B.2	1	6B	443.67	HJHQ (FarmCPU/GLM/MLM), BLUP (FarmCPU)
GC	qGC6B.3	1	6B	461.42	HJHQ (FarmCPU)
GC	qGC6D	1	6D	438.92	HJHQ (FarmCPU/GLM)
GC	qGC7A.1	1	7A	40.67	HJHQ (FarmCPU/GLM/MLM)
GC	qGC7A.2	1	7A	603.95	HJHQ (FarmCPU)
BV	qBV1B	1	1B	656.86	WLTQQ (FarmCPU/GLM/MLM)
BV	qBV2D.1	1	2D	419.86	WLTQQ (FarmCPU/GLM/MLM)
BV	qBV2D.2	2	2D	481.59-489.72	WLTQQ (FarmCPU/GLM), BLUP (FarmCPU/GLM/MLM)
BV	qBV3D.1	1	3D	137.89	WLTQQ (FarmCPU)
BV	qBV3D.2	3	3D	571.36-572.83	WLTQQ (FarmCPU/GLM), BLUP (FarmCPU/GLM)
BV	qBV4A	1	4A	174.39	WLTQQ (GLM)
BV	qBV4B.1	4	4B	479.41	WLTQQ (FarmCPU/GLM/MLM)
BV	qBV4B.2	3	4B	658.77-659.07	LH (FarmCPU/GLM/MLM)
BV	qBV4D	1	4D	47.32	LH (FarmCPU/GLM/MLM)
BV	qBV5A	2	5A	479.28-479.31	BLUP (FarmCPU/GLM)
BV	qBV5D	25	5D	547.50-549.49	LH (FarmCPU/GLM/MLM), BLUP (FarmCPU/GLM/MLM)
BV	qBV6B.1	12	6B	613.35-632.44	LH (FarmCPU/GLM/MLM), BLUP (FarmCPU/GLM)
BV	qBV6B.2	7	6B	658.73-662.45	LH (FarmCPU/GLM/MLM), WLTQQ (FarmCPU/GLM/MLM), BLUP (FarmCPU/GLM/MLM)
BV	qBV6D	1	6D	437.62	LH (FarmCPU/GLM), WLTQQ (FarmCPU/GLM/MLM), BLUP (FarmCPU/GLM/MLM)
BV	qBV7B.1	1	7B	605.96	WLTQQ (GLM/MLM), BLUP (FarmCPU/GLM)
BV	qBV7B.2	7	7B	634.30-635.02	LH (FarmCPU/GLM), WLTQQ (FarmCPU/GLM), BLUP (FarmCPU/GLM/MLM)
BV	qBV7D	1	7D	515.22	BLUP (FarmCPU)
HA	qHA1A.1	1	1A	54.5	WLTQQ (GLM), BLUP (GLM)
HA	qHA1A.2	57	1A	301.16-308.81	HJHQ (GLM)
HA	qHA1B.1	8	1B	336.20-343.25	WLTQQ (GLM/MLM), BLUP (GLM/MLM)
HA	qHA1B.2	1	1B	656.86	WLTQQ (GLM)
HA	qHA1D	1	1D	240.89	HJHQ (GLM)
HA	qHA2B.1	1	2B	30.55	BLUP (GLM)
HA	qHA2B.2	1	2B	105.48	WLTQQ (GLM), BLUP (GLM/MLM)
HA	qHA2B.3	2	2B	749.07-749.29	BLUP (GLM)
HA	qHA2D.1	1	2D	34.23	WLTQQ (GLM/MLM), BLUP (GLM/MLM)
HA	qHA2D.2	1	2D	489.72	WLTQQ (GLM)
HA	qHA3D.1	1	2D	137.89	WLTQQ (GLM)
HA	qHA3D.2	3	3D	571.36-572.83	LH (FarmCPU/GLM), WLTQQ (FarmCPU/GLM/MLM), BLUP (FarmCPU/GLM/MLM)
HA	qHA4A	1	4A	11.99	BLUP (GLM)
HA	qHA4B.1	2	4B	465.74-465.90	WLTQQ (GLM), BLUP (GLM)
HA	qHA4B.2	29	4B	477.23-481.80	WLTQQ (GLM/MLM), BLUP (GLM)
HA	qHA4B.3	12	4B	658.66-659.16	LH (GLM/MLM), WLTQQ (GLM), BLUP (GLM/MLM)
HA	qHA4D	1	4D	47.32	LH (GLM/MLM), WLTQQ (GLM/MLM), BLUP (GLM/MLM)
HA	qHA5A.1	1	5A	18.84	BLUP (GLM)
HA	qHA5A.2	1	5A	516.64	BLUP (GLM)
HA	qHA5B.1	1	5A	590.53	BLUP (GLM/MLM)
HA	qHA5B.2	1	5A	681.13	HJHQ (FarmCPU)
HA	qHA5B.3	1	5A	712.4	HJHQ (GLM), BLUP (GLM/MLM)
HA	qHA5D	39	5D	547.50-550.44	LH (GLM/MLM), WLTQQ (GLM/MLM), BLUP (GLM/MLM)
HA	qHA6B.1	1	6B	577.47	BLUP (GLM/MLM)
HA	qHA6B.2	23	6B	613.35-632.44	HJHQ (GLM/MLM), LH (GLM/MLM), WLTQQ (GLM/MLM), BLUP (GLM/MLM)
HA	qHA6B.3	19	6B	653.06-662.45	HJHQ (GLM/MLM), LH (GLM/MLM), WLTQQ (GLM/MLM), BLUP (GLM/MLM)
HA	qHA6D.1	1	6D	437.62	WLTQQ (GLM/MLM), BLUP (GLM/MLM)
HA	qHA6D.2	2	6D	470.09-470.96	BLUP (GLM/MLM)
HA	qHA7A.1	3	7A	280.11-284.15	WLTQQ (GLM), BLUP (GLM/MLM)
HA	qHA7A.2	6	7A	303.97-339.13	BLUP (GLM/MLM)
HA	qHA7A.3	1	7A	348.72	BLUP (GLM/MLM)
HA	qHA7A.4	2	7A	375.87-383.20	BLUP (GLM/MLM)
HA	qHA7A.5	2	7A	395.38-414.55	BLUP (GLM)
HA	qHA7A.6	2	7A	441.84-446.17	BLUP (GLM/MLM)
HA	qHA7B.1	23	7B	134.56-137.79	BLUP (GLM/MLM)
HA	qHA7B.2	7	7B	605.96-635.02	WLTQQ (GLM/MLM), BLUP (GLM/MLM)
HA	qHA7D	1	7D	174.14	HJHQ (GLM), BLUP (GLM/MLM)
SV	qSV1B	6	1B	338.00-343.25	WLTQQ (GLM/MLM)
SV	qSV1D	1	1D	114.13	WLTQQ (FarmCPU)
SV	qSV2A	1	2A	750.22	WLTQQ (FarmCPU)
SV	qSV2B	1	2B	105.48	WLTQQ (GLM)
SV	qSV2D.1	1	2D	155.97	LH (FarmCPU)
SV	qSV2D.2	1	2D	241.34	LH (FarmCPU)
SV	qSV2D.3	1	2D	489.72	WLTQQ (GLM/MLM), BLUP (FarmCPU/GLM)
SV	qSV4B	13	4B	649.58-659.16	LH (GLM/MLM), WLTQQ (FarmCPU/GLM/MLM), BLUP (GLM)
SV	qSV5A	1	5A	523.61	WLTQQ (GLM)
SV	qSV5B	1	5B	712.4	WLTQQ (GLM)
SV	qSV6B.1	23	6B	613.35-632.44	LH (GLM), WLTQQ (GLM/MLM), BLUP (GLM/MLM)
SV	qSV6B.2	6	6B	658.73-661.25	LH (GLM/MLM)
SV	qSV6D.1	1	6D	437.62	WLTQQ (GLM/MLM), BLUP (GLM)
SV	qSV6D.2	11	6D	470.09-470.96	LH (GLM), WLTQQ (FarmCPU/GLM)
SV	qSV7A	3	7A	28.05-28.60	WLTQQ (GLM/MLM)
SV	qSV7B.1	4	7B	132.11-133.79	WLTQQ (GLM/MLM)
SV	qSV7B.2	7	7B	605.96-635.02	WLTQQ (GLM/MLM)
SV	qSV7D	1	7D	174.14	WLTQQ (GLM/MLM)
