# Supplementary material for: Genome-Wide Association Study Reveals the Genetic Basis of Five Quality Traits in Chinese Wheat
Source: Front Plant Sci. 2022 Mar 3;13:835306. doi: 10.3389/fpls.2022.835306 (PMC8928432; doi:10.3389/fpls.2022.835306)
Supplement: Supplementary Table 4 — Annotation genes within the 4 Mb region flanking of the significant SNPs included in stable QTL for five quality traits. [file Table_4.XLSX]

## Sheet: PC
Table S4.1 Annotation genes within the 4 Mb region flanking of the significant SNPs included in stable QTL for PC
QTL	Gene	Location	Description	Oryza sativa	Arabidopsis thaliana
qPC1A	TraesCS1A02G164600	chr1A:297376881-297381017(+)	Plant/F9H3-4 protein	Os10g0494000	NA
	TraesCS1A02G164700	chr1A:297696462-297700859(-)	WAT1-related protein	Os10g0493900	AT3G02690
	TraesCS1A02G164800	chr1A:297744935-297751007(-)	NA	Os10g0493600	AT5G08370
	TraesCS1A02G164900	chr1A:297872019-297874932(-)	Alpha-galactosidase	Os10g0492900	AT5G08380
	TraesCS1A02G165000	chr1A:297883147-297883659(+)	cyclic nucleotide gated channel 1	NA	NA
	TraesCS1A02G165100	chr1A:297885172-297885423(+)	Cytochrome b559 subunit alpha	Os03g0659233	ATCG00580
	TraesCS1A02G165200	chr1A:297885575-297885691(+)	Photosystem II reaction center protein L	CAA33963	ATCG00560
	TraesCS1A02G165300	chr1A:298034053-298037445(+)	Ser/Thr protein phosphatase family protein, expressed	Os10g0492800	NA
	TraesCS1A02G165400	chr1A:298105708-298107333(-)	Aquaporin	Os10g0492600	AT1G73190
	TraesCS1A02G165500	chr1A:298108442-298116154(+)	AT hook motif-containing protein, putative	NA	NA
	TraesCS1A02G165600	chr1A:298152317-298155073(-)	Receptor kinase	Os10g0492400	NA
	TraesCS1A02G165700	chr1A:298557743-298566718(+)	Chloroplast inner envelope protein, putative, expressed	Os10g0492300	NA
	TraesCS1A02G165800	chr1A:298601923-298610934(+)	Chloroplast inner envelope protein, putative, expressed	Os10g0492000	AT1G06950
	TraesCS1A02G165900	chr1A:298613622-298615547(-)	G-patch domain containing protein, expressed	Os10g0491900	AT5G08535
	TraesCS1A02G166000	chr1A:298621356-298621852(+)	Ubiquitin	Os06g0681400	AT3G09790
	TraesCS1A02G166100	chr1A:298635520-298636647(-)	Plant basic secretory family protein	Os10g0490900	AT2G15220
	TraesCS1A02G166200	chr1A:298646085-298646780(-)	Plant basic secretory family protein	Os10g0491000	NA
	TraesCS1A02G166300	chr1A:298725244-298725951(+)	Plant basic secretory family protein	Os10g0491000	NA
	TraesCS1A02G166400	chr1A:299103405-299106055(+)	Disease resistance protein (NBS-LRR class) family	NA	NA
	TraesCS1A02G166500	chr1A:299267975-299268403(+)	Peroxidase	NA	NA
	TraesCS1A02G166600	chr1A:299424945-299426015(-)	Plant basic secretory family protein	Os10g0490900	AT2G15220
	TraesCS1A02G166800	chr1A:299543000-299543506(+)	Non-structural protein 2	NA	NA
	TraesCS1A02G166900	chr1A:299624485-299657841(+)	NA	Os02g0545000	AT1G04160
	TraesCS1A02G167000	chr1A:299719197-299719790(+)	Ripening related protein family	Os10g0490666	NA
	TraesCS1A02G167100	chr1A:300003984-300004745(+)	Late embryogenesis abundant (LEA) hydroxyproline-rich glycoprotein	NA	NA
	TraesCS1A02G167200	chr1A:300100764-300102768(+)	Reactive oxygen species modulator 1	NA	AT3G07910
	TraesCS1A02G167300	chr1A:300105516-300106916(-)	UPF0415 protein C7orf25	Os10g0489800	NA
	TraesCS1A02G167400	chr1A:300107115-300111644(+)	CDT1-like protein a, chloroplastic	Os10g0489900	NA
	TraesCS1A02G167500	chr1A:300116122-300116981(-)	Ripening related protein family	Os10g0490666	NA
	TraesCS1A02G167600	chr1A:300395391-300396164(-)	DUF538 family protein, putative (Protein of unknown function, DUF538)	Os12g0198000	NA
	TraesCS1A02G167700	chr1A:300567524-300568194(+)	Ripening related protein family	Os10g0490100	NA
	TraesCS1A02G167800	chr1A:300576956-300577529(+)	Ripening-related protein	Os10g0489301	NA
	TraesCS1A02G167900	chr1A:300672635-300673168(+)	Ripening-related protein	Os10g0489301	NA
	TraesCS1A02G168100	chr1A:300856554-300860113(-)	Carboxypeptidase	Os03g0393700	AT2G27920
	TraesCS1A02G168200	chr1A:300926978-300927678(-)	Ripening-related protein	Os10g0489301	NA
	TraesCS1A02G168300	chr1A:300944023-300944609(+)	Ripening-related protein	Os10g0489301	NA
	TraesCS1A02G168400	chr1A:301128322-301134198(+)	Ribosomal RNA small subunit methyltransferase H	Os09g0531100	AT2G21385
	TraesCS1A02G168500	chr1A:301158124-301162597(+)	Short-chain dehydrogenase/reductase family protein	Os11g0432600	NA
	TraesCS1A02G168600	chr1A:301196754-301200037(-)	Calcium uniporter protein, mitochondrial	Os10g0501500	NA
	TraesCS1A02G168700	chr1A:301628584-301631797(-)	Pentatricopeptide repeat-containing protein, putative	Os10g0501300	NA
	TraesCS1A02G168800	chr1A:301773020-301775767(+)	Pentatricopeptide repeat-containing protein	Os07g0598500	NA
	TraesCS1A02G168900	chr1A:301776169-301779892(-)	Monothiol glutaredoxin	Os10g0500700	AT4G04950
	TraesCS1A02G169000	chr1A:301781001-301784189(-)	acyl-UDP-N-acetylglucosamine O-acyltransferase	Os10g0500600	NA
	TraesCS1A02G169100	chr1A:301857603-301864368(-)	30S ribosomal protein S18	Os10g0500500	NA
	TraesCS1A02G169200	chr1A:301894091-301894885(+)	N-acetyltransferase	Os10g0500400	AT1G03650
	TraesCS1A02G169300	chr1A:301895909-301899325(-)	RING finger protein	Os10g0500300	AT5G58787
	TraesCS1A02G169400	chr1A:302196340-302197949(+)	Myb transcription factor	NA	NA
	TraesCS1A02G169500	chr1A:302198139-302200788(-)	Protein NEOXANTHIN-DEFICIENT 1	Os10g0499600	AT1G28100
	TraesCS1A02G169600	chr1A:302628523-302639166(-)	Maf-like protein, expressed	Os11g0549655	AT2G25500
	TraesCS1A02G169700	chr1A:302899182-302906773(-)	Leucine-rich repeat receptor-like protein kinase family protein	Os06g0274300	AT5G21090
	TraesCS1A02G169800	chr1A:302912219-302913447(+)	Cortactin-binding protein 2	NA	NA
	TraesCS1A02G169900	chr1A:302957961-302959148(-)	agenet domain protein (DOMAIN OF UNKNOWN FUNCTION 724 6)	NA	NA
	TraesCS1A02G170000	chr1A:303727691-303730110(-)	CBS domain-containing protein CBSX5	Os10g0499400	NA
	TraesCS1A02G170100	chr1A:303849555-303852175(+)	RP/EB family microtubule-associated protein	Os10g0498900	AT3G47690
	TraesCS1A02G170200	chr1A:303853527-303858626(-)	Major facilitator superfamily transporter	Os07g0208900	AT4G36790
	TraesCS1A02G170300	chr1A:304029764-304036570(-)	Trafficking protein particle complex subunit 13	Os10g0498800	AT2G47960
	TraesCS1A02G170400	chr1A:304036915-304047086(-)	NA	Os10g0498700	AT4G04920
	TraesCS1A02G170500	chr1A:304996060-304998794(+)	Pre-mRNA splicing factor-related	Os10g0498600	AT4G03430
	TraesCS1A02G170600	chr1A:305004105-305006483(-)	Epoxide hydrolase 2	Os10g0498200	NA
	TraesCS1A02G170700	chr1A:305326594-305329046(-)	Epoxide hydrolase 2	Os10g0498200	NA
	TraesCS1A02G170800	chr1A:305333684-305336077(-)	LanC-like protein	Os10g0497900	AT1G52920
	TraesCS1A02G170900	chr1A:305363883-305368036(-)	Prolyl 4-hydroxylase alpha subunit, putative	Os10g0497800	AT1G20270
	TraesCS1A02G171000	chr1A:305606261-305608388(+)	Protochlorophyllide reductase	Os10g0496900	AT5G54190
	TraesCS1A02G171100	chr1A:306106802-306115293(+)	NA	Os10g0497000	NA
	TraesCS1A02G171200	chr1A:306117845-306120605(+)	1-acyl-sn-glycerol-3-phosphate acyltransferase	Os10g0497100	AT4G30580
	TraesCS1A02G171300	chr1A:306149738-306151032(+)	Dof zinc finger protein	Os12g0590700	NA
	TraesCS1A02G171400	chr1A:306550347-306553305(-)	Fiber protein Fb34	Os10g0495900	AT1G52910
	TraesCS1A02G171500	chr1A:306637419-306644050(+)	RNA binding protein, putative	Os03g0326600	NA
	TraesCS1A02G171600	chr1A:306684328-306684652(-)	Alpha-1,3-mannosyl-glycoprotein 4-beta-N-acetylglucosaminyltransferase A	Os02g0552400	NA
	TraesCS1A02G171700	chr1A:307033684-307041155(+)	Protein arginine methyltransferase	Os10g0489100	AT3G20020
	TraesCS1A02G171800	chr1A:307043474-307044677(+)	Nucleoside diphosphate-linked moiety X motif 19	NA	NA
	TraesCS1A02G171900	chr1A:307060493-307061834(+)	F-box family protein	NA	NA
	TraesCS1A02G172100	chr1A:307700421-307707523(-)	DNA ligase	Os10g0489200	AT1G08130
	TraesCS1A02G172200	chr1A:307735535-307736499(+)	B3 domain-containing protein	NA	NA
	TraesCS1A02G172300	chr1A:308202620-308211209(+)	NA	Os10g0135200	AT5G64813
	TraesCS1A02G172400	chr1A:308245586-308246137(-)	Rho GTPase-activating protein 35	NA	NA
	TraesCS1A02G172600	chr1A:308569895-308571435(+)	Tetratricopeptide repeat (TPR)-like superfamily protein	Os10g0501900	NA
	TraesCS1A02G172700	chr1A:308571441-308576188(-)	Thylakoid lumenal 17.4 kDa protein, chloroplastic	Os10g0502000	AT5G53490
	TraesCS1A02G172800	chr1A:308786782-308787045(+)	Gamma-tubulin complex component 3	Os10g0502100	NA
	TraesCS1A02G172900	chr1A:308804882-308806552(-)	Cytochrome P450, putative	Os10g0512400	NA
	TraesCS1A02G173000	chr1A:308810895-308811509(-)	Clavata3/ESR (CLE) gene family member	Os10g0502300	NA
	TraesCS1A02G173100	chr1A:308812574-308816474(-)	NA	Os10g0502400	AT1G58290
	TraesCS1A02G173200	chr1A:308950731-308953133(-)	NA	Os10g0502500	AT2G24940
	TraesCS1A02G173300	chr1A:308954317-308956460(+)	B3 domain-containing protein	NA	NA
	TraesCS1A02G173400	chr1A:309401615-309403447(-)	Membrane steroid-binding protein	Os10g0502600	AT3G48890
	TraesCS1A02G173500	chr1A:309457556-309466082(-)	NA	Os10g0502900	NA
	TraesCS1A02G173600	chr1A:309740231-309741734(-)	LIM domain containing protein	Os10g0503100	AT1G01780
	TraesCS1A02G173700	chr1A:309742789-309758319(-)	Folylpolyglutamate synthase	Os10g0503200	AT3G55630
	TraesCS1A02G173800	chr1A:309789692-309791565(+)	Benzyl alcohol O-benzoyltransferase	Os10g0503300	AT5G17540
	TraesCS1A02G173900	chr1A:309910012-309913118(-)	Diacylglycerol O-acyltransferase 2	Os06g0326700	NA
	TraesCS1A02G174000	chr1A:310130105-310255049(+)	NA	NA	NA
	TraesCS1A02G174100	chr1A:311059509-311060627(+)	F-box protein	NA	NA
	TraesCS1A02G174200	chr1A:311525112-311526359(+)	2-isopropylmalate synthase	NA	NA
	TraesCS1A02G174300	chr1A:311771378-311771641(-)	GRF zinc finger family protein	NA	NA
	TraesCS1A02G174400	chr1A:311806706-311808758(-)	ALG-2 interacting protein X	Os10g0495300	NA
	TraesCS1A02G174500	chr1A:311812456-311816565(-)	Tetraspanin family protein	Os10g0503600	AT1G63260
	TraesCS1A02G174600	chr1A:311846860-311852943(-)	ATP-dependent RNA helicase	Os10g0503700	AT4G00660
	TraesCS1A02G174700	chr1A:312159893-312161436(-)	Remorin	Os10g0503800	NA
	TraesCS1A02G174800	chr1A:312583634-312585896(+)	Nucleotide binding, putative	NA	NA
	TraesCS1A02G174900	chr1A:312584969-312607067(-)	Cytochrome b561	Os10g0504200	AT4G25570
	TraesCS1A02G175000	chr1A:312772250-312777623(+)	NA	Os10g0504600	NA
	TraesCS1A02G175100	chr1A:313006745-313007070(-)	Lipid transfer protein	Os10g0505700	NA
	TraesCS1A02G175200	chr1A:313161460-313162228(-)	Lipid transfer protein	Os10g0505700	NA
	TraesCS1A02G175300	chr1A:313478337-313478911(-)	stress response NST1-like protein	NA	NA
	TraesCS1A02G175500	chr1A:313489231-313491849(+)	Low-temperature-induced 65 kDa protein	Os10g0505900	NA
	TraesCS1A02G175600	chr1A:313590610-313592112(+)	Pentatricopeptide repeat-containing protein	Os10g0506000	AT1G55630
	TraesCS1A02G175700	chr1A:313738701-313751739(-)	Tetratricopeptide repeat protein 1	Os10g0507600	NA
	TraesCS1A02G175800	chr1A:313744357-313748524(+)	Leukocyte receptor cluster member 1	Os10g0507500	NA
	TraesCS1A02G175900	chr1A:313903531-313912668(-)	Chaperone protein dnaJ, putative	Os10g0507800	AT2G35720
	TraesCS1A02G176000	chr1A:314428210-314432375(+)	Monocopper oxidase-like protein SKU5	Os10g0508000	AT4G12420
	TraesCS1A02G176100	chr1A:314491807-314494505(+)	P-loop containing nucleoside triphosphate hydrolases superfamily protein	NA	NA
	TraesCS1A02G176200	chr1A:314511390-314513466(+)	DUF641 family protein (DUF641)	Os10g0508100	NA
	TraesCS1A02G176300	chr1A:314620483-314624358(-)	YABBY protein	Os10g0508300	NA
	TraesCS1A02G176400	chr1A:315061895-315062158(+)	Serine--tRNA ligase	NA	NA
	TraesCS1A02G176500	chr1A:315834151-315840625(-)	U1 small nuclear ribonucleoprotein 70 kDa	NA	NA
	TraesCS1A02G176700	chr1A:317810558-317815516(+)	NA	Os10g0516500	NA
	TraesCS1A02G176800	chr1A:319077590-319079046(+)	Nucleotide-diphospho-sugar transferases superfamily protein	Os10g0516400	AT1G64980
	TraesCS1A02G176900	chr1A:319079823-319087554(-)	NA	Os10g0516300	AT2G43400
	TraesCS1A02G177000	chr1A:319319608-319321634(+)	Kinase family protein	Os10g0516200	NA
	TraesCS1A02G177100	chr1A:319445759-319447575(-)	Cytochrome P450 family protein	Os10g0515200	AT1G64940
	TraesCS1A02G177200	chr1A:319734016-319734649(-)	Octicosapeptide/Phox/Bem1p (PB1) domain-containing protein / tetratricopeptide repeat (TPR)-containing protein	NA	NA
	TraesCS1A02G177300	chr1A:319887494-319889455(-)	Cytochrome P450 family protein	Os10g0515200	AT1G64900
	TraesCS1A02G177400	chr1A:320222699-320224716(-)	Protein BPS1, chloroplastic	Os10g0513300	NA
	TraesCS1A02G177500	chr1A:320333954-320338598(+)	Aquaporin-1	Os10g0513200	AT4G10380
	TraesCS1A02G177600	chr1A:320479860-320494972(+)	Kinesin-like protein	Os10g0512800	AT4G39050
	TraesCS1A02G177700	chr1A:320891334-320895519(+)	SH3 domain-containing protein 1	Os10g0512700	AT4G34660
	TraesCS1A02G177800	chr1A:321110255-321114846(+)	Cytochrome P450 family protein	Os10g0512400	AT4G36220
	TraesCS1A02G177900	chr1A:321228079-321228991(+)	AT1G17665-like protein	NA	NA
	TraesCS1A02G178000	chr1A:321395030-321399108(+)	Transmembrane and coiled-coil domain-containing protein 4	Os10g0512100	AT4G36210
	TraesCS1A02G178100	chr1A:321402669-321412297(-)	Zinc finger CCCH domain protein	Os10g0511800	NA
	TraesCS1A02G178200	chr1A:321875570-321880525(-)	NA	Os10g0511600	AT4G36195
	TraesCS1A02G178300	chr1A:321882666-321888083(-)	Serine carboxypeptidase S28 family protein	Os10g0511400	AT4G36195
qPC5A.3	TraesCS5A02G261400	chr5A:475294763-475296594(+)	FAD-binding Berberine family protein	Os06g0549900	NA
	TraesCS5A02G261500	chr5A:475312927-475321451(+)	bZIP transcription factor, putative (DUF1664)	Os09g0482740	NA
	TraesCS5A02G261600	chr5A:475323952-475327684(-)	Disease resistance protein (NBS-LRR class) family	Os09g0517100	NA
	TraesCS5A02G261700	chr5A:475373082-475377089(+)	NBS-LRR disease resistance protein	Os09g0479500	NA
	TraesCS5A02G261800	chr5A:475377947-475378168(+)	Pigment epithelium-derived factor	NA	NA
	TraesCS5A02G261900	chr5A:475464797-475468063(-)	Eukaryotic translation initiation factor 3 subunit E	Os07g0222300	AT3G57290
	TraesCS5A02G262000	chr5A:475524603-475526894(-)	Fasciclin-like arabinogalactan protein	Os09g0482780	NA
	TraesCS5A02G262100	chr5A:475596526-475597202(+)	Calcium-binding EF-hand family protein-like	Os09g0483100	NA
	TraesCS5A02G262200	chr5A:475599380-475600112(+)	Calcium-binding EF-hand family protein-like	Os09g0483100	NA
	TraesCS5A02G262300	chr5A:475616536-475618402(+)	Anamorsin homolog	Os04g0674400	NA
	TraesCS5A02G262400	chr5A:475632850-475633263(+)	Calcium-binding EF-hand family protein-like	Os09g0483500	AT2G44310
	TraesCS5A02G262500	chr5A:475644081-475645286(+)	Unknown protein	NA	NA
	TraesCS5A02G262600	chr5A:475656292-475662357(-)	NA	Os09g0484300	NA
	TraesCS5A02G262700	chr5A:475749396-475751408(+)	Pirin-like protein	Os09g0484800	AT1G50590
	TraesCS5A02G262800	chr5A:475830726-475831989(-)	PRAS-rich protein	NA	NA
	TraesCS5A02G262900	chr5A:476023790-476024822(+)	Oligopeptide transporter, putative	NA	AT4G26590
	TraesCS5A02G263100	chr5A:476072760-476075399(+)	Tonoplast dicarboxylate transporter	Os09g0484900	AT5G47560
	TraesCS5A02G263200	chr5A:476222004-476226236(+)	Zinc finger protein	Os09g0485600	AT3G57670
	TraesCS5A02G263300	chr5A:476356308-476357216(+)	Phospho-N-acetylmuramoyl-pentapeptide-transferase	Os09g0485800	NA
	TraesCS5A02G263400	chr5A:476399506-476400096(+)	PRELI/MSF1-like protein	Os09g0486000	AT5G13070
	TraesCS5A02G263500	chr5A:476402386-476403836(+)	Zinc finger A20 and AN1 domain stress-associated protein	Os09g0486500	NA
	TraesCS5A02G263600	chr5A:476413141-476414784(+)	Protein kinase	Os09g0486700	NA
	TraesCS5A02G263700	chr5A:476435047-476439364(+)	NA	Os09g0462875	NA
	TraesCS5A02G263800	chr5A:476454487-476460281(+)	Serine carboxypeptidase family protein, expressed	Os09g0462875	NA
	TraesCS5A02G263900	chr5A:476460790-476465844(+)	Serine carboxypeptidase family protein, expressed	Os09g0462875	NA
	TraesCS5A02G264000	chr5A:476602065-476607176(-)	NA	Os09g0487200	AT3G57780
	TraesCS5A02G264100	chr5A:476657946-476659277(+)	NA	Os09g0500100	NA
	TraesCS5A02G264200	chr5A:476659462-476660931(+)	F-box protein	Os09g0502600	NA
	TraesCS5A02G264300	chr5A:476665982-476666707(-)	ESSS subunit of NADH:ubiquinone oxidoreductase (complex I) protein	Os09g0487500	AT3G57785
	TraesCS5A02G264400	chr5A:476667366-476670027(-)	NA	Os09g0487600	AT3G57790
	TraesCS5A02G264500	chr5A:476682552-476687413(-)	Peptidylprolyl isomerase	Os09g0501850	AT3G10060
	TraesCS5A02G264600	chr5A:476758909-476760574(+)	OTU domain-containing protein	Os09g0487700	AT3G57810
	TraesCS5A02G264700	chr5A:476765227-476765859(-)	Peptide deformylase	NA	NA
	TraesCS5A02G264800	chr5A:476835724-476838249(+)	Basic helix-loop-helix (BHLH) DNA-binding superfamily	Os09g0487900	AT3G57800
	TraesCS5A02G264900	chr5A:476851213-476851713(-)	Glucosamine 6-phosphate N-acetyltransferase	Os09g0488000	AT5G15770
	TraesCS5A02G265000	chr5A:476850991-476855275(+)	Inactive rhomboid 1	Os09g0488600	AT5G12930
	TraesCS5A02G265100	chr5A:476892059-476897121(+)	Cobyric acid synthase	Os09g0488700	AT4G12070
	TraesCS5A02G265200	chr5A:476895311-476898049(-)	NA	Os09g0488800	AT5G12900
	TraesCS5A02G265300	chr5A:476999711-477005035(+)	Protein SDA1-like protein	Os04g0630000	NA
	TraesCS5A02G265400	chr5A:477220872-477224754(+)	C2 calcium/lipid-binding and GRAM domain protein	Os05g0370600	AT3G57880
	TraesCS5A02G265500	chr5A:477294609-477299357(-)	2-oxoglutarate (2OG) and Fe(II)-dependent oxygenase superfamily protein	Os09g0489200	AT3G20810
	TraesCS5A02G265600	chr5A:477392155-477401214(-)	transcription factor-like protein	Os09g0489500	AT5G06839
	TraesCS5A02G265700	chr5A:477435606-477437444(-)	ETHYLENE INSENSITIVE 3-like 3 protein	Os09g0490200	NA
	TraesCS5A02G265800	chr5A:477451162-477454290(-)	Beta-glucosidase, putative	Os09g0491100	NA
	TraesCS5A02G265900	chr5A:477584230-477587453(-)	NA	Os09g0491532	AT3G57920
	TraesCS5A02G266000	chr5A:477715007-477716356(-)	rho GTPase-activating gacO-like protein	Os09g0491596	AT3G57930
	TraesCS5A02G266100	chr5A:477804688-477809940(-)	Cytochrome P450, putative	Os09g0447300	AT5G06900
	TraesCS5A02G266200	chr5A:477814172-477815335(-)	Leucine-rich repeat receptor-like protein kinase family protein	Os09g0491612	AT5G06870
	TraesCS5A02G266300	chr5A:477818330-477818976(-)	Polyamine aminopropyltransferase	Os09g0502600	NA
	TraesCS5A02G266400	chr5A:477997389-478001035(+)	Emsy N terminus domain-containing family protein	Os04g0659400	AT5G13020
	TraesCS5A02G266500	chr5A:478004378-478013885(+)	NA	Os07g0616500	AT3G14130
	TraesCS5A02G266600	chr5A:478013865-478017109(-)	NA	Os09g0491660	AT3G57980
	TraesCS5A02G266700	chr5A:478018470-478019546(-)	CCAAT/enhancer-binding protein delta	Os09g0491676	AT3G57990
	TraesCS5A02G266800	chr5A:478318678-478319019(-)	Protein NUCLEAR FUSION DEFECTIVE 5, mitochondrial	Os08g0511600	NA
	TraesCS5A02G266900	chr5A:478319922-478322382(-)	Exodeoxyribonuclease 7 large subunit	Os09g0491692	AT2G17350
	TraesCS5A02G267000	chr5A:478322728-478326825(-)	AT hook motif DNA-binding family protein	Os09g0491708	NA
	TraesCS5A02G267100	chr5A:478816502-478821070(+)	DNA-directed RNA polymerase	Os07g0172500	AT3G52090
	TraesCS5A02G267200	chr5A:478835285-478837847(+)	carboxyl-terminal peptidase (DUF239)	NA	NA
	TraesCS5A02G267300	chr5A:478842931-478847413(-)	Auxin efflux carrier family protein, putative	Os09g0491740	NA
	TraesCS5A02G267400	chr5A:478848240-478849481(+)	CAI-1 autoinducer sensor kinase/phosphatase cqsS isoform 1	NA	NA
	TraesCS5A02G267500	chr5A:478856444-478858218(+)	Splicing factor U2af small subunit A	Os09g0491756	AT3G44785
	TraesCS5A02G267600	chr5A:478859090-478859335(+)	1-pyrroline-5-carboxylate dehydrogenase	NA	NA
	TraesCS5A02G267700	chr5A:478861586-478865149(+)	plant/protein (Protein of unknown function, DUF538)	Os07g0119800	NA
	TraesCS5A02G267800	chr5A:478882356-478882772(+)	plant/protein (Protein of unknown function, DUF538)	Os07g0119800	NA
	TraesCS5A02G267900	chr5A:478892825-478893253(+)	DUF538 family protein (Protein of unknown function, DUF538)	Os07g0119800	AT1G09310
	TraesCS5A02G268000	chr5A:478895295-478895684(+)	DUF538 family protein (Protein of unknown function, DUF538)	Os07g0119800	NA
	TraesCS5A02G268100	chr5A:478895557-478899843(-)	Chaperone DnaK	Os09g0491772	AT5G09590
	TraesCS5A02G268200	chr5A:478990828-478993317(-)	Cinnamoyl-CoA reductase 4	Os09g0491820	AT1G76470
	TraesCS5A02G268300	chr5A:479046817-479048596(+)	Cinnamoyl-CoA reductase 4	Os09g0491788	AT1G76470
	TraesCS5A02G268400	chr5A:479200118-479205257(-)	Cinnamoyl-CoA reductase 4	Os09g0491788	AT1G76470
	TraesCS5A02G268500	chr5A:479226112-479232368(-)	Cinnamoyl-CoA reductase 4	Os09g0491788	AT1G76470
	TraesCS5A02G268600	chr5A:479236388-479239870(-)	Cinnamoyl-CoA reductase 4	Os09g0491820	AT1G76470
	TraesCS5A02G268700	chr5A:479395215-479397884(-)	Dihydroflavonol-4-reductase	Os09g0491820	AT1G76470
	TraesCS5A02G268800	chr5A:479403123-479408759(-)	Cinnamoyl-CoA reductase 4	Os09g0491820	AT1G76470
	TraesCS5A02G268900	chr5A:479461601-479462506(-)	hydroxysteroid dehydrogenase 3	Os09g0459800	AT1G67730
	TraesCS5A02G269000	chr5A:479908442-479911830(-)	Calcineurin B-like protein	Os02g0802400	AT3G18430
	TraesCS5A02G269100	chr5A:480040450-480042878(-)	Dihydroflavonol-4-reductase	Os09g0491788	AT1G76470
	TraesCS5A02G269200	chr5A:480087126-480090250(-)	Cinnamoyl-CoA reductase 4	Os09g0491820	AT1G76470
	TraesCS5A02G269300	chr5A:480172711-480176594(+)	3-hydroxy-3-methylglutaryl coenzyme A reductase	Os09g0492700	AT1G76490
	TraesCS5A02G269400	chr5A:480183019-480183345(-)	B3 domain-containing protein REM17	NA	NA
	TraesCS5A02G269500	chr5A:480283165-480289527(+)	Proton pump-interactor 1	NA	AT1G20970
	TraesCS5A02G269600	chr5A:480292061-480292976(-)	Cysteine/histidine-rich C1 domain protein	Os09g0492800	AT1G20990
	TraesCS5A02G269700	chr5A:480305049-480305468(+)	Ripening-related protein	NA	NA
	TraesCS5A02G269800	chr5A:480334734-480337599(+)	NAD(P)-binding Rossmann-fold superfamily protein	NA	NA
	TraesCS5A02G269900	chr5A:480406588-480407319(+)	50S ribosomal protein L10	Os09g0493000	AT1G76600
	TraesCS5A02G270000	chr5A:480503178-480504041(+)	HTH-type transcriptional regulator	Os09g0492900	AT1G76600
	TraesCS5A02G270100	chr5A:480507905-480508712(+)	TMV response-related protein	Os09g0492900	AT1G76600
	TraesCS5A02G270200	chr5A:480512320-480514863(-)	Cytochrome P450	Os09g0447300	NA
	TraesCS5A02G270300	chr5A:480528810-480533219(+)	Serine/threonine-protein kinase	Os09g0511000	NA
	TraesCS5A02G270400	chr5A:480629792-480630472(-)	UvrB/UvrC domain protein (DUF3506)	NA	NA
	TraesCS5A02G270500	chr5A:480731088-480732123(-)	Mediator of RNA polymerase II transcription subunit 2	NA	NA
	TraesCS5A02G270600	chr5A:480786311-480788504(-)	transmembrane protein, putative (DUF594)	NA	NA
	TraesCS5A02G270700	chr5A:480816641-480820191(-)	Cytochrome P450	Os09g0447300	NA
	TraesCS5A02G270800	chr5A:481199152-481205436(-)	Tyrosine--tRNA ligase	NA	NA
	TraesCS5A02G270900	chr5A:481665044-481670394(+)	Serine/threonine-protein phosphatase	Os03g0805300	AT3G58500
	TraesCS5A02G271100	chr5A:481888494-481893022(+)	electron transporter, putative (Protein of unknown function, DUF547)	Os09g0493400	AT1G76620
	TraesCS5A02G271200	chr5A:481893381-481895246(-)	Dihydroflavonol-4-reductase	Os09g0493500	AT1G76470
	TraesCS5A02G271300	chr5A:481895424-481896362(-)	Uroporphyrinogen-III synthase	NA	NA
	TraesCS5A02G271400	chr5A:481896560-481899808(-)	Protein Iojap/ribosomal silencing factor RsfS	Os09g0493600	NA
	TraesCS5A02G271500	chr5A:481900414-481904347(-)	NA	Os09g0493700	NA
	TraesCS5A02G271600	chr5A:481906957-481907888(-)	RING/U-box superfamily protein	Os09g0478600	NA
	TraesCS5A02G271700	chr5A:481909340-481914148(-)	Chaperone protein dnaJ, putative	Os09g0493800	AT1G76700
	TraesCS5A02G271800	chr5A:481915107-481915529(+)	Cleavage and polyadenylation specificity factor (CPSF) A subunit protein	NA	NA
	TraesCS5A02G271900	chr5A:481918960-481919551(-)	F-box protein	Os09g0502600	NA
	TraesCS5A02G272000	chr5A:481926540-481928191(+)	F-box protein	Os09g0502800	NA
	TraesCS5A02G272100	chr5A:481929585-481933573(-)	F-box protein	Os09g0502800	NA
	TraesCS5A02G272200	chr5A:481935780-481939490(+)	NBS-LRR disease resistance protein, putative	Os09g0517200	NA
	TraesCS5A02G272300	chr5A:482023862-482024401(+)	Cytochrome c biogenesis protein CcsA	CAA33952	ATCG01040
	TraesCS5A02G272400	chr5A:482118145-482120100(+)	Chitinase-like protein	Os09g0494200	AT1G05850
	TraesCS5A02G272500	chr5A:482120607-482128020(-)	Methyl-CpG-binding domain protein	Os09g0494300	NA
	TraesCS5A02G272600	chr5A:482315663-482317456(+)	WD-repeat cell cycle regulatory protein	Os02g0700100	AT4G33270
	TraesCS5A02G272700	chr5A:482355299-482356561(+)	NBS-LRR disease resistance protein-like protein	Os09g0479500	NA
	TraesCS5A02G272800	chr5A:482356600-482357829(+)	Disease resistance protein	NA	NA
	TraesCS5A02G272900	chr5A:482358950-482360378(-)	Prefoldin chaperone subunit family protein	NA	NA
	TraesCS5A02G273000	chr5A:482368913-482369872(+)	NBS-LRR disease resistance protein	Os09g0517100	NA
	TraesCS5A02G273100	chr5A:482375542-482376227(-)	Prefoldin chaperone subunit family protein	NA	NA
	TraesCS5A02G273200	chr5A:482484238-482485528(-)	N-acetyl-gamma-glutamyl-phosphate reductase	Os09g0494500	NA
	TraesCS5A02G273300	chr5A:482533228-482534391(+)	plant/protein (Protein of unknown function, DUF599)	Os09g0494600	NA
	TraesCS5A02G273400	chr5A:482621900-482622691(+)	plant/protein (Protein of unknown function, DUF599)	Os09g0494600	AT4G31330
	TraesCS5A02G273500	chr5A:482718183-482720260(+)	Protein FATTY ACID EXPORT 3, chloroplastic	Os09g0495000	NA
	TraesCS5A02G273700	chr5A:482753747-482754238(-)	Ubiquitin-like-specific protease 1A	NA	NA
	TraesCS5A02G273800	chr5A:482786075-482789471(+)	NA	Os09g0495200	NA
	TraesCS5A02G273900	chr5A:482811358-482812667(-)	3'-N-debenzoyl-2'-deoxytaxol N-benzoyltransferase	NA	NA
	TraesCS5A02G274000	chr5A:482822558-482827513(-)	Protein FATTY ACID EXPORT 1, chloroplastic	Os09g0495000	NA
	TraesCS5A02G274100	chr5A:482902191-482904566(-)	Receptor-like protein kinase	Os09g0471400	NA
	TraesCS5A02G274200	chr5A:482907781-482921585(+)	Amorpha-4,11-diene synthase	Os09g0495200	NA

## Sheet: GC
Table S4.2 Annotation genes within the 4 Mb region flanking of the significant SNPs included in stable QTL for GC
QTL	Gene	Location	Description	Oryza sativa	Arabidopsis thaliana
qGC2B.2	TraesCS2B02G525900	chr2B:719966007-719970727(+)	Inositol-pentakisphosphate 2-kinase	Os04g0661200	NA
	TraesCS2B02G526000	chr2B:719980007-719980711(+)	Heavy metal transport/detoxification superfamily protein	Os04g0661100	NA
	TraesCS2B02G526100	chr2B:719982847-719984216(-)	Alpha/beta-Hydrolases superfamily protein, putative	Os08g0475400	NA
	TraesCS2B02G526200	chr2B:720473250-720486136(+)	NA	Os04g0660500	AT3G13530
	TraesCS2B02G526300	chr2B:720574356-720582327(+)	NA	Os01g0521500	NA
	TraesCS2B02G526400	chr2B:720800976-720807374(+)	NA	NA	NA
	TraesCS2B02G526500	chr2B:720922331-720923687(-)	Xyloglucan endotransglucosylase/hydrolase	NA	NA
	TraesCS2B02G526600	chr2B:721109805-721111232(-)	Xyloglucan endotransglucosylase/hydrolase	NA	NA
	TraesCS2B02G526700	chr2B:721112407-721113545(-)	Alpha-1,4-glucan-protein synthase [UDP-forming]	Os04g0660400	AT5G16510
	TraesCS2B02G526800	chr2B:721113584-721114693(-)	Alpha-1,4-glucan-protein synthase	NA	AT4G30390
	TraesCS2B02G526900	chr2B:721276433-721281197(+)	Protein kinase-like	Os04g0660200	AT1G11390
	TraesCS2B02G527000	chr2B:721360914-721361726(-)	calpain-type cysteine protease family	NA	NA
	TraesCS2B02G527100	chr2B:721715342-721719755(+)	Transcription factor, putative	Os04g0660100	NA
	TraesCS2B02G527200	chr2B:721724156-721724377(+)	Powder tolerance-related protein	NA	NA
	TraesCS2B02G527300	chr2B:721725855-721726154(-)	Pleckstrin homology-like domain family B member 1	Os04g0660000	NA
	TraesCS2B02G527400	chr2B:721921688-721925169(-)	CsAtPR5	Os04g0640300	NA
	TraesCS2B02G527500	chr2B:721927644-721929980(-)	CsAtPR5	Os04g0640300	NA
	TraesCS2B02G527600	chr2B:722079572-722086040(-)	Protein pelota homolog	Os04g0659900	AT4G27650
	TraesCS2B02G527700	chr2B:722089474-722094751(-)	DUF1365 family protein	Os07g0153300	NA
	TraesCS2B02G527800	chr2B:722324948-722326595(-)	Amino acid permease	Os04g0659800	AT5G23810
	TraesCS2B02G527900	chr2B:722329543-722342865(-)	NA	Os07g0456500	NA
	TraesCS2B02G528000	chr2B:722345621-722347107(-)	BTB-POZ and MATH domain protein	NA	NA
	TraesCS2B02G528100	chr2B:722616850-722620885(+)	NA	Os04g0659500	AT4G31750
	TraesCS2B02G528200	chr2B:722625918-722629264(+)	Bifunctional lysine-specific demethylase and histidyl-hydroxylase NO66	Os04g0659150	NA
	TraesCS2B02G528300	chr2B:722629776-722634436(+)	Glutamine synthetase	Os04g0659100	AT5G16570
	TraesCS2B02G528400	chr2B:722637506-722638296(-)	Lysostaphin resistance protein A	Os04g0659000	NA
	TraesCS2B02G528500	chr2B:722862712-722863020(+)	Clavata3/ESR (CLE) gene family member	Os04g0658800	NA
	TraesCS2B02G528600	chr2B:723042523-723044901(-)	Receptor-like protein kinase	Os04g0658700	NA
	TraesCS2B02G528700	chr2B:723131455-723136061(+)	CsAtPR5	Os04g0640300	NA
	TraesCS2B02G528800	chr2B:723329805-723334415(+)	CsAtPR5	Os04g0640300	NA
	TraesCS2B02G528900	chr2B:723387084-723398038(-)	NA	Os06g0158900	AT3G59140
	TraesCS2B02G529000	chr2B:723398572-723407033(-)	NA	Os06g0158900	AT3G59140
	TraesCS2B02G529100	chr2B:723446610-723447203(+)	RING/U-box superfamily protein, putative	NA	NA
	TraesCS2B02G529200	chr2B:723962714-723963618(+)	Dehydration responsive element binding transcription factor	Os04g0648900	NA
	TraesCS2B02G529300	chr2B:724397702-724403214(+)	Ribulose bisphosphate carboxylase/oxygenase activase	Os04g0658300	AT1G73110
	TraesCS2B02G529400	chr2B:724410165-724411721(+)	C2 domain-containing protein	Os02g0327000	AT3G17980
	TraesCS2B02G529500	chr2B:724548736-724550534(+)	SsrA-binding	Os04g0658200	NA
	TraesCS2B02G529600	chr2B:724552183-724554439(-)	Transcriptional adapter 1	Os04g0658100	NA
	TraesCS2B02G529800	chr2B:724691454-724696414(-)	Aldose 1-epimerase family protein	Os04g0658000	AT5G57330
	TraesCS2B02G529900	chr2B:724741324-724741610(-)	3-isopropylmalate dehydratase large subunit	Os04g0657900	NA
	TraesCS2B02G530000	chr2B:724747615-724749891(-)	NA	Os04g0657500	NA
	TraesCS2B02G530100	chr2B:724754847-724758478(+)	Farnesyl pyrophosphate synthase	Os04g0657100	AT4G17190
	TraesCS2B02G530200	chr2B:725107210-725111521(+)	Peroxidase	Os04g0656800	AT4G37520
	TraesCS2B02G530300	chr2B:725111649-725113924(-)	Universal stress family protein	Os01g0511100	NA
	TraesCS2B02G530400	chr2B:725575939-725580611(-)	Squamosa promoter-binding-like protein	Os04g0656500	NA
	TraesCS2B02G530500	chr2B:725959929-725966383(-)	Plasma membrane ATPase	Os04g0656100	AT2G18960
	TraesCS2B02G530600	chr2B:726125422-726126977(+)	Serpin family protein	NA	NA
	TraesCS2B02G530700	chr2B:726129992-726131671(+)	Serpin family protein	NA	NA
	TraesCS2B02G530800	chr2B:726135808-726136590(+)	Ethylene-responsive transcription factor	Os04g0655700	NA
	TraesCS2B02G530900	chr2B:726224279-726227206(+)	CsAtPR5	Os04g0640300	NA
	TraesCS2B02G531000	chr2B:726463229-726465615(+)	CsAtPR5	Os04g0640300	NA
	TraesCS2B02G531100	chr2B:726545695-726546716(+)	Ethylene-responsive transcription factor	Os04g0655700	NA
	TraesCS2B02G531200	chr2B:726547280-726554093(-)	Nuclear pore complex protein NUP1	Os04g0655600	NA
	TraesCS2B02G531300	chr2B:726684953-726686563(-)	Heat-shock protein, putative	NA	NA
	TraesCS2B02G531400	chr2B:727084736-727086253(+)	CsAtPR5	Os04g0640300	NA
	TraesCS2B02G531500	chr2B:727205103-727206413(-)	CsAtPR5	Os04g0640300	NA
	TraesCS2B02G531600	chr2B:727220915-727222982(-)	Flavonoid 3'-hydroxylase	Os03g0367200	NA
	TraesCS2B02G531800	chr2B:727240475-727243906(+)	Receptor-like kinase	Os04g0655400	NA
	TraesCS2B02G531900	chr2B:727241186-727243849(-)	UDP-glycosyltransferase	NA	NA
	TraesCS2B02G532000	chr2B:727652802-727655234(-)	Receptor-like kinase	Os04g0655300	NA
	TraesCS2B02G532100	chr2B:727679756-727682262(-)	Receptor-like kinase	Os04g0655300	NA
	TraesCS2B02G532200	chr2B:727682860-727689186(+)	NBS-LRR disease resistance protein, putative, expressed	NA	NA
	TraesCS2B02G532300	chr2B:728196144-728197739(-)	Glycosyltransferase	Os05g0526800	NA
	TraesCS2B02G532400	chr2B:728268394-728270126(-)	Glycosyltransferase	Os05g0526800	NA
	TraesCS2B02G532500	chr2B:728300103-728300976(+)	phospholipase D beta 1	NA	NA
	TraesCS2B02G532600	chr2B:728397380-728398594(-)	Glutathione S-transferase	Os10g0527400	NA
	TraesCS2B02G532700	chr2B:728559987-728562235(-)	Subtilisin-like protease	Os04g0559000	NA
	TraesCS2B02G532800	chr2B:728584819-728587062(-)	Subtilisin-like protease	NA	NA
	TraesCS2B02G532900	chr2B:729132686-729137065(-)	Receptor-like kinase	Os04g0654600	AT2G18890
	TraesCS2B02G533000	chr2B:729140321-729140870(+)	Homeodomain-like superfamily protein	NA	NA
	TraesCS2B02G533100	chr2B:729180229-729181013(-)	Carboxyl-terminal-processing protease	NA	NA
	TraesCS2B02G533200	chr2B:729524984-729528230(+)	Cytochrome P450-like	Os01g0627400	AT3G14680
	TraesCS2B02G533300	chr2B:729627351-729630308(+)	Sucrose transporter	Os02g0576600	NA
	TraesCS2B02G533400	chr2B:729764907-729771410(+)	NA	Os04g0658700	NA
	TraesCS2B02G533500	chr2B:729877980-729878189(+)	Sulfhydryl oxidase 1	NA	NA
	TraesCS2B02G533600	chr2B:729896836-729902592(-)	Kaurene synthase	Os04g0611800	NA
	TraesCS2B02G533700	chr2B:729956496-729958232(+)	WAT1-related protein	NA	NA
	TraesCS2B02G533800	chr2B:730079440-730083075(-)	Zinc transporter	Os07g0232800	NA
	TraesCS2B02G533900	chr2B:730186099-730192137(+)	Sec14p-like phosphatidylinositol transfer family protein	Os08g0341700	NA
	TraesCS2B02G534000	chr2B:730298365-730302983(-)	AP2-like ethylene-responsive transcription factor	Os04g0653600	NA
	TraesCS2B02G534100	chr2B:730526798-730527391(+)	Myb/SANT-like DNA-binding domain protein	NA	NA
	TraesCS2B02G534200	chr2B:730562324-730569849(-)	NADPH--cytochrome P450 reductase	Os04g0653400	AT4G30210
	TraesCS2B02G534300	chr2B:730610166-730613531(+)	Lipoate-protein ligase A	Os08g0435800	AT3G29010
	TraesCS2B02G534400	chr2B:730613404-730618486(-)	NA	Os11g0151700	AT3G52820
	TraesCS2B02G534500	chr2B:730646073-730647025(-)	Auxin-responsive protein	Os04g0653300	NA
	TraesCS2B02G534600	chr2B:730848622-730852822(-)	Vacuolar cation/proton exchanger, putative	Os04g0653200	AT3G13320
	TraesCS2B02G534700	chr2B:730995988-730998568(+)	UPF0136 membrane protein	Os04g0653100	AT2G26240
	TraesCS2B02G534800	chr2B:730999882-731004636(-)	Jasmonate ZIM domain-containing protein	Os04g0653000	NA
	TraesCS2B02G534900	chr2B:731069279-731070126(+)	kinase interacting (KIP1-like) family protein	NA	NA
	TraesCS2B02G535000	chr2B:731250064-731252586(+)	NA	NA	AT5G02490
	TraesCS2B02G535100	chr2B:731304075-731313574(+)	Nuclease	NA	NA
	TraesCS2B02G535200	chr2B:731340026-731343282(+)	Peptidyl-tRNA hydrolase, putative	Os04g0652900	AT5G16870
	TraesCS2B02G535300	chr2B:731343713-731348664(-)	Nuclease S1	Os04g0652700	NA
	TraesCS2B02G535400	chr2B:731350300-731353876(-)	Nuclease S1	Os04g0652700	NA
	TraesCS2B02G535500	chr2B:731460182-731462978(-)	Nuclease S1	Os04g0652700	NA
	TraesCS2B02G535600	chr2B:731480831-731482520(-)	3-ketoacyl-CoA synthase	NA	NA
	TraesCS2B02G535700	chr2B:731535259-731536635(-)	3-ketoacyl-CoA synthase	NA	NA
	TraesCS2B02G535800	chr2B:731561401-731564433(-)	Nuclease S1	Os04g0652700	NA
	TraesCS2B02G535900	chr2B:731600447-731603049(+)	F-box protein	NA	NA
	TraesCS2B02G536000	chr2B:731603259-731609742(+)	Golgin candidate 2	Os04g0652500	NA
	TraesCS2B02G536100	chr2B:731889302-731896486(+)	Sulfate transporter	Os04g0652400	AT1G23090
	TraesCS2B02G536200	chr2B:731895898-731898962(-)	Kinase, putative	Os04g0651500	NA
	TraesCS2B02G536300	chr2B:731933894-731935553(-)	Benzyl alcohol O-benzoyltransferase	Os04g0664600	NA
	TraesCS2B02G536400	chr2B:732017353-732020895(-)	Kinase, putative	Os04g0651500	NA
	TraesCS2B02G536500	chr2B:732038730-732042160(-)	Kinase, putative	Os04g0658700	NA
	TraesCS2B02G536600	chr2B:732044802-732047394(-)	Kinase, putative	Os04g0651500	NA
	TraesCS2B02G536700	chr2B:732222759-732224651(+)	Receptor-like protein kinase, putative	Os04g0658700	NA
	TraesCS2B02G536800	chr2B:732223289-732223837(-)	long-chain base (LCB) kinase 1	NA	NA
	TraesCS2B02G536900	chr2B:732342397-732344660(+)	NBS-LRR disease resistance protein	NA	NA
	TraesCS2B02G537000	chr2B:732346480-732352286(+)	Disease resistance protein	NA	NA
	TraesCS2B02G537100	chr2B:732567244-732570497(-)	Endo-1,4-beta-xylanase	Os10g0351700	NA
	TraesCS2B02G537200	chr2B:732591609-732592582(-)	Protein kinase family protein	Os04g0655300	NA
	TraesCS2B02G537300	chr2B:732597482-732606603(+)	Alpha-N-acetylglucosaminidase	Os04g0650900	AT5G13690
	TraesCS2B02G537400	chr2B:732839527-732839826(-)	Lipid transfer protein	NA	NA
	TraesCS2B02G537500	chr2B:732893022-732894677(+)	Kinase, putative	Os04g0658700	NA
	TraesCS2B02G537600	chr2B:733062825-733073795(+)	Kinase, putative	Os04g0651500	NA
	TraesCS2B02G537700	chr2B:733076628-733078033(-)	Peroxidase	Os04g0651000	AT5G05340
	TraesCS2B02G537800	chr2B:733178973-733186807(+)	NA	Os04g0651500	NA
	TraesCS2B02G537900	chr2B:733267240-733267973(-)	Pyrroline-5-carboxylate reductase	NA	NA
	TraesCS2B02G538000	chr2B:733470137-733475121(-)	Protein kinase-like	Os04g0658700	NA
	TraesCS2B02G538100	chr2B:733642201-733647003(-)	Kinase	Os04g0658700	NA
	TraesCS2B02G538200	chr2B:733713197-733716418(-)	Kinase	Os04g0658700	NA
	TraesCS2B02G538300	chr2B:733730631-733732147(-)	Receptor-like kinase	Os04g0649700	NA
	TraesCS2B02G538400	chr2B:733732194-733732934(-)	Protein kinase-like	Os04g0654600	NA
	TraesCS2B02G538500	chr2B:733742977-733747406(-)	Protein kinase-like	Os04g0658700	NA
	TraesCS2B02G538600	chr2B:733889920-733892344(-)	Isoaspartyl peptidase/L-asparaginase	Os04g0650700	AT3G16150
	TraesCS2B02G538700	chr2B:733970649-733973385(-)	Isoaspartyl peptidase/L-asparaginase	Os04g0650700	AT3G16150
	TraesCS2B02G538800	chr2B:734050489-734050911(-)	Isoaspartyl peptidase/L-asparaginase	Os04g0650700	AT3G16150
	TraesCS2B02G538900	chr2B:734123952-734127544(+)	Small RNA degrading nuclease	Os04g0650600	AT3G50100
	TraesCS2B02G539000	chr2B:734185174-734185410(-)	RING/U-box superfamily protein	NA	NA
	TraesCS2B02G539100	chr2B:734199796-734200667(-)	Malate synthase G	NA	NA
	TraesCS2B02G539200	chr2B:734397106-734398794(+)	Receptor-kinase, putative	Os04g0655300	AT3G50230
	TraesCS2B02G539300	chr2B:734452993-734457716(-)	cofactor assembly of complex C	Os04g0650500	AT1G59840
	TraesCS2B02G539400	chr2B:734459049-734460668(+)	UDP-glycosyltransferase	NA	NA
	TraesCS2B02G539500	chr2B:734495024-734500006(-)	Eukaryotic translation initiation factor 3 subunit I	Os08g0308100	AT2G46280
	TraesCS2B02G539600	chr2B:734719519-734726868(+)	Glycosyltransferases	Os04g0650366	AT5G67230
	TraesCS2B02G539700	chr2B:734854651-734857116(+)	30S ribosomal protein S13	Os03g0794700	AT4G09800
	TraesCS2B02G539800	chr2B:734916499-734920194(+)	Serine/threonine-protein kinase	Os04g0631800	NA
	TraesCS2B02G539900	chr2B:735517538-735521505(+)	4-hydroxy-tetrahydrodipicolinate synthase	Os04g0574800	AT2G45440
qGC5A	TraesCS5A02G261400	chr5A:475294763-475296594(+)	FAD-binding Berberine family protein	Os06g0549900	NA
	TraesCS5A02G261500	chr5A:475312927-475321451(+)	bZIP transcription factor, putative (DUF1664)	Os09g0482740	NA
	TraesCS5A02G261600	chr5A:475323952-475327684(-)	Disease resistance protein (NBS-LRR class) family	Os09g0517100	NA
	TraesCS5A02G261700	chr5A:475373082-475377089(+)	NBS-LRR disease resistance protein	Os09g0479500	NA
	TraesCS5A02G261800	chr5A:475377947-475378168(+)	Pigment epithelium-derived factor	NA	NA
	TraesCS5A02G261900	chr5A:475464797-475468063(-)	Eukaryotic translation initiation factor 3 subunit E	Os07g0222300	AT3G57290
	TraesCS5A02G262000	chr5A:475524603-475526894(-)	Fasciclin-like arabinogalactan protein	Os09g0482780	NA
	TraesCS5A02G262100	chr5A:475596526-475597202(+)	Calcium-binding EF-hand family protein-like	Os09g0483100	NA
	TraesCS5A02G262200	chr5A:475599380-475600112(+)	Calcium-binding EF-hand family protein-like	Os09g0483100	NA
	TraesCS5A02G262300	chr5A:475616536-475618402(+)	Anamorsin homolog	Os04g0674400	NA
	TraesCS5A02G262400	chr5A:475632850-475633263(+)	Calcium-binding EF-hand family protein-like	Os09g0483500	AT2G44310
	TraesCS5A02G262500	chr5A:475644081-475645286(+)	Unknown protein	NA	NA
	TraesCS5A02G262600	chr5A:475656292-475662357(-)	NA	Os09g0484300	NA
	TraesCS5A02G262700	chr5A:475749396-475751408(+)	Pirin-like protein	Os09g0484800	AT1G50590
	TraesCS5A02G262800	chr5A:475830726-475831989(-)	PRAS-rich protein	NA	NA
	TraesCS5A02G262900	chr5A:476023790-476024822(+)	Oligopeptide transporter, putative	NA	AT4G26590
	TraesCS5A02G263100	chr5A:476072760-476075399(+)	Tonoplast dicarboxylate transporter	Os09g0484900	AT5G47560
	TraesCS5A02G263200	chr5A:476222004-476226236(+)	Zinc finger protein	Os09g0485600	AT3G57670
	TraesCS5A02G263300	chr5A:476356308-476357216(+)	Phospho-N-acetylmuramoyl-pentapeptide-transferase	Os09g0485800	NA
	TraesCS5A02G263400	chr5A:476399506-476400096(+)	PRELI/MSF1-like protein	Os09g0486000	AT5G13070
	TraesCS5A02G263500	chr5A:476402386-476403836(+)	Zinc finger A20 and AN1 domain stress-associated protein	Os09g0486500	NA
	TraesCS5A02G263600	chr5A:476413141-476414784(+)	Protein kinase	Os09g0486700	NA
	TraesCS5A02G263700	chr5A:476435047-476439364(+)	NA	Os09g0462875	NA
	TraesCS5A02G263800	chr5A:476454487-476460281(+)	Serine carboxypeptidase family protein, expressed	Os09g0462875	NA
	TraesCS5A02G263900	chr5A:476460790-476465844(+)	Serine carboxypeptidase family protein, expressed	Os09g0462875	NA
	TraesCS5A02G264000	chr5A:476602065-476607176(-)	NA	Os09g0487200	AT3G57780
	TraesCS5A02G264100	chr5A:476657946-476659277(+)	NA	Os09g0500100	NA
	TraesCS5A02G264200	chr5A:476659462-476660931(+)	F-box protein	Os09g0502600	NA
	TraesCS5A02G264300	chr5A:476665982-476666707(-)	ESSS subunit of NADH:ubiquinone oxidoreductase (complex I) protein	Os09g0487500	AT3G57785
	TraesCS5A02G264400	chr5A:476667366-476670027(-)	NA	Os09g0487600	AT3G57790
	TraesCS5A02G264500	chr5A:476682552-476687413(-)	Peptidylprolyl isomerase	Os09g0501850	AT3G10060
	TraesCS5A02G264600	chr5A:476758909-476760574(+)	OTU domain-containing protein	Os09g0487700	AT3G57810
	TraesCS5A02G264700	chr5A:476765227-476765859(-)	Peptide deformylase	NA	NA
	TraesCS5A02G264800	chr5A:476835724-476838249(+)	Basic helix-loop-helix (BHLH) DNA-binding superfamily	Os09g0487900	AT3G57800
	TraesCS5A02G264900	chr5A:476851213-476851713(-)	Glucosamine 6-phosphate N-acetyltransferase	Os09g0488000	AT5G15770
	TraesCS5A02G265000	chr5A:476850991-476855275(+)	Inactive rhomboid 1	Os09g0488600	AT5G12930
	TraesCS5A02G265100	chr5A:476892059-476897121(+)	Cobyric acid synthase	Os09g0488700	AT4G12070
	TraesCS5A02G265200	chr5A:476895311-476898049(-)	NA	Os09g0488800	AT5G12900
	TraesCS5A02G265300	chr5A:476999711-477005035(+)	Protein SDA1-like protein	Os04g0630000	NA
	TraesCS5A02G265400	chr5A:477220872-477224754(+)	C2 calcium/lipid-binding and GRAM domain protein	Os05g0370600	AT3G57880
	TraesCS5A02G265500	chr5A:477294609-477299357(-)	2-oxoglutarate (2OG) and Fe(II)-dependent oxygenase superfamily protein	Os09g0489200	AT3G20810
	TraesCS5A02G265600	chr5A:477392155-477401214(-)	transcription factor-like protein	Os09g0489500	AT5G06839
	TraesCS5A02G265700	chr5A:477435606-477437444(-)	ETHYLENE INSENSITIVE 3-like 3 protein	Os09g0490200	NA
	TraesCS5A02G265800	chr5A:477451162-477454290(-)	Beta-glucosidase, putative	Os09g0491100	NA
	TraesCS5A02G265900	chr5A:477584230-477587453(-)	NA	Os09g0491532	AT3G57920
	TraesCS5A02G266000	chr5A:477715007-477716356(-)	rho GTPase-activating gacO-like protein	Os09g0491596	AT3G57930
	TraesCS5A02G266100	chr5A:477804688-477809940(-)	Cytochrome P450, putative	Os09g0447300	AT5G06900
	TraesCS5A02G266200	chr5A:477814172-477815335(-)	Leucine-rich repeat receptor-like protein kinase family protein	Os09g0491612	AT5G06870
	TraesCS5A02G266300	chr5A:477818330-477818976(-)	Polyamine aminopropyltransferase	Os09g0502600	NA
	TraesCS5A02G266400	chr5A:477997389-478001035(+)	Emsy N terminus domain-containing family protein	Os04g0659400	AT5G13020
	TraesCS5A02G266500	chr5A:478004378-478013885(+)	NA	Os07g0616500	AT3G14130
	TraesCS5A02G266600	chr5A:478013865-478017109(-)	NA	Os09g0491660	AT3G57980
	TraesCS5A02G266700	chr5A:478018470-478019546(-)	CCAAT/enhancer-binding protein delta	Os09g0491676	AT3G57990
	TraesCS5A02G266800	chr5A:478318678-478319019(-)	Protein NUCLEAR FUSION DEFECTIVE 5, mitochondrial	Os08g0511600	NA
	TraesCS5A02G266900	chr5A:478319922-478322382(-)	Exodeoxyribonuclease 7 large subunit	Os09g0491692	AT2G17350
	TraesCS5A02G267000	chr5A:478322728-478326825(-)	AT hook motif DNA-binding family protein	Os09g0491708	NA
	TraesCS5A02G267100	chr5A:478816502-478821070(+)	DNA-directed RNA polymerase	Os07g0172500	AT3G52090
	TraesCS5A02G267200	chr5A:478835285-478837847(+)	carboxyl-terminal peptidase (DUF239)	NA	NA
	TraesCS5A02G267300	chr5A:478842931-478847413(-)	Auxin efflux carrier family protein, putative	Os09g0491740	NA
	TraesCS5A02G267400	chr5A:478848240-478849481(+)	CAI-1 autoinducer sensor kinase/phosphatase cqsS isoform 1	NA	NA
	TraesCS5A02G267500	chr5A:478856444-478858218(+)	Splicing factor U2af small subunit A	Os09g0491756	AT3G44785
	TraesCS5A02G267600	chr5A:478859090-478859335(+)	1-pyrroline-5-carboxylate dehydrogenase	NA	NA
	TraesCS5A02G267700	chr5A:478861586-478865149(+)	plant/protein (Protein of unknown function, DUF538)	Os07g0119800	NA
	TraesCS5A02G267800	chr5A:478882356-478882772(+)	plant/protein (Protein of unknown function, DUF538)	Os07g0119800	NA
	TraesCS5A02G267900	chr5A:478892825-478893253(+)	DUF538 family protein (Protein of unknown function, DUF538)	Os07g0119800	AT1G09310
	TraesCS5A02G268000	chr5A:478895295-478895684(+)	DUF538 family protein (Protein of unknown function, DUF538)	Os07g0119800	NA
	TraesCS5A02G268100	chr5A:478895557-478899843(-)	Chaperone DnaK	Os09g0491772	AT5G09590
	TraesCS5A02G268200	chr5A:478990828-478993317(-)	Cinnamoyl-CoA reductase 4	Os09g0491820	AT1G76470
	TraesCS5A02G268300	chr5A:479046817-479048596(+)	Cinnamoyl-CoA reductase 4	Os09g0491788	AT1G76470
	TraesCS5A02G268400	chr5A:479200118-479205257(-)	Cinnamoyl-CoA reductase 4	Os09g0491788	AT1G76470
	TraesCS5A02G268500	chr5A:479226112-479232368(-)	Cinnamoyl-CoA reductase 4	Os09g0491788	AT1G76470
	TraesCS5A02G268600	chr5A:479236388-479239870(-)	Cinnamoyl-CoA reductase 4	Os09g0491820	AT1G76470
	TraesCS5A02G268700	chr5A:479395215-479397884(-)	Dihydroflavonol-4-reductase	Os09g0491820	AT1G76470
	TraesCS5A02G268800	chr5A:479403123-479408759(-)	Cinnamoyl-CoA reductase 4	Os09g0491820	AT1G76470
	TraesCS5A02G268900	chr5A:479461601-479462506(-)	hydroxysteroid dehydrogenase 3	Os09g0459800	AT1G67730
	TraesCS5A02G269000	chr5A:479908442-479911830(-)	Calcineurin B-like protein	Os02g0802400	AT3G18430
	TraesCS5A02G269100	chr5A:480040450-480042878(-)	Dihydroflavonol-4-reductase	Os09g0491788	AT1G76470
	TraesCS5A02G269200	chr5A:480087126-480090250(-)	Cinnamoyl-CoA reductase 4	Os09g0491820	AT1G76470
	TraesCS5A02G269300	chr5A:480172711-480176594(+)	3-hydroxy-3-methylglutaryl coenzyme A reductase	Os09g0492700	AT1G76490
	TraesCS5A02G269400	chr5A:480183019-480183345(-)	B3 domain-containing protein REM17	NA	NA
	TraesCS5A02G269500	chr5A:480283165-480289527(+)	Proton pump-interactor 1	NA	AT1G20970
	TraesCS5A02G269600	chr5A:480292061-480292976(-)	Cysteine/histidine-rich C1 domain protein	Os09g0492800	AT1G20990
	TraesCS5A02G269700	chr5A:480305049-480305468(+)	Ripening-related protein	NA	NA
	TraesCS5A02G269800	chr5A:480334734-480337599(+)	NAD(P)-binding Rossmann-fold superfamily protein	NA	NA
	TraesCS5A02G269900	chr5A:480406588-480407319(+)	50S ribosomal protein L10	Os09g0493000	AT1G76600
	TraesCS5A02G270000	chr5A:480503178-480504041(+)	HTH-type transcriptional regulator	Os09g0492900	AT1G76600
	TraesCS5A02G270100	chr5A:480507905-480508712(+)	TMV response-related protein	Os09g0492900	AT1G76600
	TraesCS5A02G270200	chr5A:480512320-480514863(-)	Cytochrome P450	Os09g0447300	NA
	TraesCS5A02G270300	chr5A:480528810-480533219(+)	Serine/threonine-protein kinase	Os09g0511000	NA
	TraesCS5A02G270400	chr5A:480629792-480630472(-)	UvrB/UvrC domain protein (DUF3506)	NA	NA
	TraesCS5A02G270500	chr5A:480731088-480732123(-)	Mediator of RNA polymerase II transcription subunit 2	NA	NA
	TraesCS5A02G270600	chr5A:480786311-480788504(-)	transmembrane protein, putative (DUF594)	NA	NA
	TraesCS5A02G270700	chr5A:480816641-480820191(-)	Cytochrome P450	Os09g0447300	NA
	TraesCS5A02G270800	chr5A:481199152-481205436(-)	Tyrosine--tRNA ligase	NA	NA
	TraesCS5A02G270900	chr5A:481665044-481670394(+)	Serine/threonine-protein phosphatase	Os03g0805300	AT3G58500
	TraesCS5A02G271100	chr5A:481888494-481893022(+)	electron transporter, putative (Protein of unknown function, DUF547)	Os09g0493400	AT1G76620
	TraesCS5A02G271200	chr5A:481893381-481895246(-)	Dihydroflavonol-4-reductase	Os09g0493500	AT1G76470
	TraesCS5A02G271300	chr5A:481895424-481896362(-)	Uroporphyrinogen-III synthase	NA	NA
	TraesCS5A02G271400	chr5A:481896560-481899808(-)	Protein Iojap/ribosomal silencing factor RsfS	Os09g0493600	NA
	TraesCS5A02G271500	chr5A:481900414-481904347(-)	NA	Os09g0493700	NA
	TraesCS5A02G271600	chr5A:481906957-481907888(-)	RING/U-box superfamily protein	Os09g0478600	NA
	TraesCS5A02G271700	chr5A:481909340-481914148(-)	Chaperone protein dnaJ, putative	Os09g0493800	AT1G76700
	TraesCS5A02G271800	chr5A:481915107-481915529(+)	Cleavage and polyadenylation specificity factor (CPSF) A subunit protein	NA	NA
	TraesCS5A02G271900	chr5A:481918960-481919551(-)	F-box protein	Os09g0502600	NA
	TraesCS5A02G272000	chr5A:481926540-481928191(+)	F-box protein	Os09g0502800	NA
	TraesCS5A02G272100	chr5A:481929585-481933573(-)	F-box protein	Os09g0502800	NA
	TraesCS5A02G272200	chr5A:481935780-481939490(+)	NBS-LRR disease resistance protein, putative	Os09g0517200	NA
	TraesCS5A02G272300	chr5A:482023862-482024401(+)	Cytochrome c biogenesis protein CcsA	CAA33952	ATCG01040
	TraesCS5A02G272400	chr5A:482118145-482120100(+)	Chitinase-like protein	Os09g0494200	AT1G05850
	TraesCS5A02G272500	chr5A:482120607-482128020(-)	Methyl-CpG-binding domain protein	Os09g0494300	NA
	TraesCS5A02G272600	chr5A:482315663-482317456(+)	WD-repeat cell cycle regulatory protein	Os02g0700100	AT4G33270
	TraesCS5A02G272700	chr5A:482355299-482356561(+)	NBS-LRR disease resistance protein-like protein	Os09g0479500	NA
	TraesCS5A02G272800	chr5A:482356600-482357829(+)	Disease resistance protein	NA	NA
	TraesCS5A02G272900	chr5A:482358950-482360378(-)	Prefoldin chaperone subunit family protein	NA	NA
	TraesCS5A02G273000	chr5A:482368913-482369872(+)	NBS-LRR disease resistance protein	Os09g0517100	NA
	TraesCS5A02G273100	chr5A:482375542-482376227(-)	Prefoldin chaperone subunit family protein	NA	NA
	TraesCS5A02G273200	chr5A:482484238-482485528(-)	N-acetyl-gamma-glutamyl-phosphate reductase	Os09g0494500	NA
	TraesCS5A02G273300	chr5A:482533228-482534391(+)	plant/protein (Protein of unknown function, DUF599)	Os09g0494600	NA
	TraesCS5A02G273400	chr5A:482621900-482622691(+)	plant/protein (Protein of unknown function, DUF599)	Os09g0494600	AT4G31330
	TraesCS5A02G273500	chr5A:482718183-482720260(+)	Protein FATTY ACID EXPORT 3, chloroplastic	Os09g0495000	NA
	TraesCS5A02G273700	chr5A:482753747-482754238(-)	Ubiquitin-like-specific protease 1A	NA	NA
	TraesCS5A02G273800	chr5A:482786075-482789471(+)	NA	Os09g0495200	NA
	TraesCS5A02G273900	chr5A:482811358-482812667(-)	3'-N-debenzoyl-2'-deoxytaxol N-benzoyltransferase	NA	NA
	TraesCS5A02G274000	chr5A:482822558-482827513(-)	Protein FATTY ACID EXPORT 1, chloroplastic	Os09g0495000	NA
	TraesCS5A02G274100	chr5A:482902191-482904566(-)	Receptor-like protein kinase	Os09g0471400	NA
	TraesCS5A02G274200	chr5A:482907781-482921585(+)	Amorpha-4,11-diene synthase	Os09g0495200	NA

## Sheet: BV
Table S4.3 Annotation genes within the 4 Mb region flanking of the significant SNPs included in stable QTL for BV
QTL	Gene	Location	Description	Oryza sativa	Arabidopsis thaliana
qBV2D.2	TraesCS2D02G374300	chr2D:477627271-477628424(-)	Response regulator	Os04g0524300	AT1G10470
	TraesCS2D02G374400	chr2D:477831015-477832502(+)	Glycosyltransferase	Os04g0523600	NA
	TraesCS2D02G374500	chr2D:477992196-477994249(+)	Glycosyltransferase	Os04g0523600	NA
	TraesCS2D02G374600	chr2D:478098755-478102639(-)	Cytokinin oxidase/dehydrogenase	Os04g0523500	NA
	TraesCS2D02G374700	chr2D:478117740-478124100(-)	Alpha/beta-Hydrolases superfamily protein	Os05g0363100	AT3G62860
	TraesCS2D02G374800	chr2D:478698769-478699299(+)	Glutamate receptor ionotropic, kainate 3	NA	NA
	TraesCS2D02G374900	chr2D:478702877-478703799(+)	Oxygen-evolving enhancer protein 3-2, chloroplastic	Os04g0523000	NA
	TraesCS2D02G375000	chr2D:478703850-478707796(-)	Histone H2A deubiquitinase (DUF3755)	Os04g0523100	NA
	TraesCS2D02G375100	chr2D:478818753-478831938(-)	NA	Os04g0523200	AT2G39260
	TraesCS2D02G375200	chr2D:478873485-478877543(-)	Oxygen-evolving enhancer protein 3-2	Os04g0522800	NA
	TraesCS2D02G375300	chr2D:479179051-479181453(+)	Gibberellin 2-beta-dioxygenase	Os04g0522500	AT4G21200
	TraesCS2D02G375400	chr2D:480069864-480070725(+)	Harpin-induced protein 1 containing protein	Os07g0250900	NA
	TraesCS2D02G375500	chr2D:480131108-480131686(+)	Leguminosin group485 secreted peptide	Os04g0521900	NA
	TraesCS2D02G375600	chr2D:480132090-480138998(-)	IAA-amino acid hydrolase ILR1, putative	Os04g0521800	AT5G54140
	TraesCS2D02G375700	chr2D:480159970-480162915(-)	IAA-amino acid hydrolase ILR1, putative	Os04g0521800	AT5G54140
	TraesCS2D02G375800	chr2D:480163435-480165466(-)	Ypt/Rab-GAP domain of gyp1p superfamily protein	Os04g0521700	NA
	TraesCS2D02G375900	chr2D:480172601-480172864(-)	Acyl-CoA N-acyltransferase with RING/FYVE/PHD-type zinc finger protein	Os04g0521300	NA
	TraesCS2D02G376000	chr2D:480179043-480181999(-)	Aquaporin	Os04g0521100	AT3G53420
	TraesCS2D02G376100	chr2D:480323349-480325615(-)	Aquaporin	Os04g0521100	AT3G53420
	TraesCS2D02G376200	chr2D:480509349-480510743(-)	Pentatricopeptide repeat-containing protein	Os04g0520900	AT2G37230
	TraesCS2D02G376300	chr2D:480573812-480574946(+)	senescence regulator (Protein of unknown function, DUF584)	Os04g0520700	AT2G28400
	TraesCS2D02G376400	chr2D:480759071-480769878(+)	Endoplasmic reticulum metallopeptidase 1	Os04g0519925	AT5G20660
	TraesCS2D02G376500	chr2D:480770565-480771257(-)	PHP	NA	NA
	TraesCS2D02G376600	chr2D:480775965-480778720(-)	Auxin response factor	Os04g0519700	AT2G28350
	TraesCS2D02G376700	chr2D:481047552-481049955(+)	Pentatricopeptide repeat-containing protein	Os06g0506100	AT3G53360
	TraesCS2D02G376800	chr2D:481051280-481056521(-)	Transporter-related family protein	Os02g0628200	AT2G28315
	TraesCS2D02G376900	chr2D:481150583-481155099(-)	Cytokinin riboside 5'-monophosphate phosphoribohydrolase	Os04g0518800	AT3G53450
	TraesCS2D02G377000	chr2D:481571548-481574693(+)	Serine palmitoyltransferase small subunit A	Os04g0518650	AT1G06515
	TraesCS2D02G377100	chr2D:481574749-481575553(+)	cytochrome P450, family 76, subfamily C, polypeptide 1	Os04g0518600	NA
	TraesCS2D02G377200	chr2D:481599475-481602192(+)	Phenylalanine ammonia-lyase	Os04g0518400	AT2G37040
	TraesCS2D02G377400	chr2D:481688099-481691192(+)	Phenylalanine ammonia-lyase	Os04g0518400	AT2G37040
	TraesCS2D02G377500	chr2D:481960998-481964109(+)	Phenylalanine ammonia-lyase	Os04g0518400	AT2G37040
	TraesCS2D02G377600	chr2D:481988232-481990914(+)	Phenylalanine ammonia-lyase	Os04g0518400	AT2G37040
	TraesCS2D02G377700	chr2D:482173942-482175278(-)	Glucuronoxylan 4-O-methyltransferase	Os11g0490100	NA
	TraesCS2D02G377800	chr2D:482327837-482328304(-)	SAUR-like auxin-responsive family protein	Os04g0517900	AT2G37030
	TraesCS2D02G377900	chr2D:482348502-482351038(-)	Protein kinase family protein	Os04g0517700	AT2G37050
	TraesCS2D02G378000	chr2D:482380071-482382529(-)	Protein kinase family protein	Os04g0517700	AT2G37050
	TraesCS2D02G378100	chr2D:482417159-482418633(-)	Kinase family protein	Os02g0625300	AT3G04530
	TraesCS2D02G378200	chr2D:482656352-482661655(-)	Hexosyltransferase	Os04g0517400	AT5G18480
	TraesCS2D02G378300	chr2D:482661808-482665750(+)	Protein root UVB sensitive 2, chloroplastic	Os04g0517300	AT2G31190
	TraesCS2D02G378400	chr2D:482789645-482791656(+)	NA	Os02g0624300	NA
	TraesCS2D02G378500	chr2D:482800493-482806515(-)	NA	NA	AT3G04380
	TraesCS2D02G378600	chr2D:483067090-483067606(+)	Mitochondrial import receptor subunit TOM22	Os02g0131600	AT5G43970
	TraesCS2D02G378700	chr2D:483074183-483076518(-)	Protodermal factor 1	Os04g0517000	NA
	TraesCS2D02G378800	chr2D:483164687-483167080(+)	NAC domain protein,	Os04g0515900	AT3G04430
	TraesCS2D02G378900	chr2D:483255313-483257114(-)	LIGHT-DEPENDENT SHORT HYPOCOTYLS-like protein (DUF640)	Os04g0516200	AT3G04510
	TraesCS2D02G379000	chr2D:483630649-483633789(-)	L-allo-threonine aldolase	Os04g0516600	AT3G04520
	TraesCS2D02G379200	chr2D:483761757-483763561(+)	Sister chromatid cohesion protein PDS5-like protein B	Os04g0516900	NA
	TraesCS2D02G379300	chr2D:483785196-483786358(+)	CASP-like protein	NA	NA
	TraesCS2D02G379400	chr2D:483837676-483838853(-)	3-hydroxyacyl-[acyl-carrier-protein] dehydratase FabZ	Os08g0225000	AT2G22230
	TraesCS2D02G379500	chr2D:484071972-484072721(+)	E3 ubiquitin-protein ligase	Os04g0684600	NA
	TraesCS2D02G379600	chr2D:484130530-484133033(-)	dCTP pyrophosphatase 1	Os04g0515400	AT3G25400
	TraesCS2D02G379700	chr2D:484326780-484329747(+)	60S ribosomal protein L14, putative	Os04g0515300	AT2G20450
	TraesCS2D02G379800	chr2D:484357949-484358590(+)	NADH dehydrogenase subunit F	NA	NA
	TraesCS2D02G379900	chr2D:484379778-484380481(-)	UDP-N-acetylmuramoylalanine--D-glutamate ligase	NA	NA
	TraesCS2D02G380000	chr2D:484381071-484381628(+)	Actin family protein	NA	NA
	TraesCS2D02G380100	chr2D:484789251-484790606(-)	UvrABC system protein B	NA	NA
	TraesCS2D02G380200	chr2D:484793004-484793560(-)	Dihydroxy-acid dehydratase	NA	NA
	TraesCS2D02G380300	chr2D:484849333-484849761(-)	Phosducin-like protein	NA	NA
	TraesCS2D02G380400	chr2D:484852818-484857228(+)	Disease resistance protein (NBS-LRR class) family	Os04g0514600	NA
	TraesCS2D02G380500	chr2D:484858484-484862886(+)	CC-NBS-LRR family disease resistance protein	Os04g0514600	NA
	TraesCS2D02G380600	chr2D:484883699-484885830(+)	Disease resistance protein (NBS-LRR class) family	NA	NA
	TraesCS2D02G380700	chr2D:484901469-484902402(+)	receptor kinase 1	Os04g0531400	NA
	TraesCS2D02G380800	chr2D:484910932-484914261(+)	CC-NBS-LRR family disease resistance protein	Os04g0514600	NA
	TraesCS2D02G380900	chr2D:484916592-484918935(-)	plastid transcriptionally active 5	Os04g0514400	NA
	TraesCS2D02G381000	chr2D:484976738-484981070(+)	Beta-glucosidase	Os04g0513400	AT4G21760
	TraesCS2D02G381100	chr2D:485078158-485090419(+)	Beta-glucosidase	Os04g0513400	AT1G61820
	TraesCS2D02G381200	chr2D:485454987-485466006(+)	Beta-glucosidase, putative	Os04g0513900	NA
	TraesCS2D02G381300	chr2D:485468451-485488430(+)	Beta-glucosidase, putative	Os04g0513100	NA
	TraesCS2D02G381400	chr2D:485489822-485491215(-)	Enolase	Os04g0513000	NA
	TraesCS2D02G381500	chr2D:485749300-485750706(+)	Embryo sac development arrest 6, putative	Os04g0512500	NA
	TraesCS2D02G381600	chr2D:485842348-485845979(+)	Protein BREAST CANCER SUSCEPTIBILITY 1-like protein	Os04g0512400	NA
	TraesCS2D02G381700	chr2D:485846617-485849064(+)	NA	Os04g0512300	NA
	TraesCS2D02G381800	chr2D:485983997-485987988(+)	Fatty acid hydroxylase superfamily protein	Os04g0512200	AT1G02205
	TraesCS2D02G381900	chr2D:485989384-485994221(+)	Fatty acid hydroxylase superfamily protein	Os04g0512200	AT1G02205
	TraesCS2D02G382000	chr2D:485999176-486002030(+)	Aspartyl/glutamyl-tRNA(Asn/Gln) amidotransferase subunit B, putative isoform 1	Os04g0511700	NA
	TraesCS2D02G382100	chr2D:486244713-486250602(+)	RING/U-box superfamily protein	Os04g0511600	NA
	TraesCS2D02G382200	chr2D:486324319-486330865(+)	Transporter	Os04g0511400	AT4G16480
	TraesCS2D02G382300	chr2D:486331488-486333024(+)	Caleosin	Os04g0511200	AT2G33380
	TraesCS2D02G382400	chr2D:486390272-486392935(+)	Vacuolar-processing enzyme	Os04g0537900	AT1G62710
	TraesCS2D02G382500	chr2D:486392195-486395421(-)	Histidine triad nucleotide binding protein	Os04g0535400	AT4G16566
	TraesCS2D02G382600	chr2D:486499933-486505905(+)	NA	Os04g0535600	AT1G62660
	TraesCS2D02G382700	chr2D:486955433-486957936(-)	YABBY protein	Os04g0536300	NA
	TraesCS2D02G382800	chr2D:487055251-487059066(-)	NAC domain protein,	Os04g0536500	AT1G62700
	TraesCS2D02G382900	chr2D:487315889-487316473(+)	Pathogenesis-related protein 1	NA	NA
	TraesCS2D02G383000	chr2D:487335889-487336164(-)	B3 domain-containing protein family	NA	NA
	TraesCS2D02G383100	chr2D:487360705-487362570(+)	Acidic leucine-rich nuclear phosphoprotein 32 family B protein	NA	NA
	TraesCS2D02G383200	chr2D:487493419-487493907(+)	SAUR-like auxin-responsive family protein	Os04g0537100	NA
	TraesCS2D02G383300	chr2D:487723116-487725292(-)	Vacuolar-processing enzyme	Os04g0537900	AT1G62710
	TraesCS2D02G383400	chr2D:487932231-487934953(-)	Vacuolar-processing enzyme	Os04g0537900	AT1G62710
	TraesCS2D02G383500	chr2D:488055731-488059567(-)	Vacuolar-processing enzyme	Os04g0537900	AT1G62710
	TraesCS2D02G383600	chr2D:488217395-488220862(+)	Hsp70-Hsp90 organizing protein 1	Os04g0538000	AT1G62740
	TraesCS2D02G383700	chr2D:488229155-488229528(+)	Light-independent protochlorophyllide reductase iron-sulfur ATP-binding protein	NA	NA
	TraesCS2D02G383800	chr2D:488230975-488236927(-)	Elongation factor G	Os04g0538100	AT1G62750
	TraesCS2D02G383900	chr2D:488363535-488364514(-)	Vacuolar iron transporter	Os04g0538400	AT3G43660
	TraesCS2D02G384000	chr2D:488452973-488454207(-)	Cysteine desulfurase	NA	NA
	TraesCS2D02G384100	chr2D:488471566-488472572(-)	Vacuolar iron transporter	Os04g0538400	AT3G43660
	TraesCS2D02G384200	chr2D:488552345-488553579(-)	Cysteine desulfurase	NA	NA
	TraesCS2D02G384300	chr2D:488994224-488995573(-)	Major facilitator superfamily protein	NA	NA
	TraesCS2D02G384400	chr2D:489008674-489009930(-)	Hydroxyproline-rich glycoprotein family protein	NA	NA
	TraesCS2D02G384500	chr2D:489368522-489370921(-)	Cysteine desulfurase	Os12g0190400	NA
	TraesCS2D02G384600	chr2D:489405882-489412577(-)	NA	Os04g0538700	NA
	TraesCS2D02G384700	chr2D:489574417-489574716(+)	Phosphoglucosamine mutase	NA	NA
	TraesCS2D02G384800	chr2D:489593613-489593924(+)	Phosphoglucosamine mutase	NA	NA
	TraesCS2D02G384900	chr2D:489637603-489637914(+)	Phosphoglucosamine mutase	NA	NA
	TraesCS2D02G385000	chr2D:489638090-489643283(-)	Kinesin-like protein	Os04g0538800	NA
	TraesCS2D02G385100	chr2D:489645242-489650315(-)	BRCT domain-containing protein	NA	NA
	TraesCS2D02G385200	chr2D:489667140-489668160(+)	Metallothiol transferase fosB	Os04g0538900	NA
	TraesCS2D02G385300	chr2D:489698342-489699667(+)	NAD(P)H-quinone oxidoreductase subunit M	Os04g0539000	AT4G37925
	TraesCS2D02G385400	chr2D:489933212-489933709(-)	Cortactin-binding protein 2	NA	NA
	TraesCS2D02G385500	chr2D:490117261-490118978(+)	Homeobox leucine zipper protein	NA	NA
	TraesCS2D02G385600	chr2D:490124820-490132486(-)	Required to maintain repression 2	NA	NA
	TraesCS2D02G385700	chr2D:490577893-490579351(+)	Uroporphyrinogen decarboxylase	Os04g0539100	NA
	TraesCS2D02G385800	chr2D:490618816-490623778(+)	Required to maintain repression 2	NA	NA
	TraesCS2D02G385900	chr2D:490677005-490681326(-)	Required to maintain repression 2	Os04g0539100	NA
	TraesCS2D02G386000	chr2D:490727245-490729226(-)	Cytochrome P450 family protein	Os04g0539300	NA
	TraesCS2D02G386100	chr2D:491192742-491195170(+)	GATA transcription factor	Os04g0539500	NA
	TraesCS2D02G386200	chr2D:491377370-491382371(-)	SH3 domain-containing protein 2	Os04g0539800	AT4G34660
	TraesCS2D02G386300	chr2D:491429370-491431171(+)	Zinc finger, B-box	Os04g0540200	NA
	TraesCS2D02G386400	chr2D:491498833-491501092(+)	Protein COBRA	Os04g0540300	NA
	TraesCS2D02G386500	chr2D:491799571-491801301(+)	Formin-like protein	NA	AT1G31810
	TraesCS2D02G386600	chr2D:491802415-491808745(+)	Formin-like protein	Os10g0119300	AT1G31810
	TraesCS2D02G386700	chr2D:491809879-491814777(-)	Aldehyde dehydrogenase	Os04g0540600	AT4G36250
	TraesCS2D02G386800	chr2D:491946854-491952076(+)	Multiprotein-bridging factor, putative	Os08g0366100	AT2G42680
	TraesCS2D02G386900	chr2D:492021498-492023218(-)	Kinase family protein	Os04g0540900	NA
	TraesCS2D02G387000	chr2D:492054619-492075235(-)	Terpene cyclase/mutase family member	Os02g0139700	AT2G07050
	TraesCS2D02G387100	chr2D:492508384-492512530(-)	Trihelix transcription factor GT-2	Os04g0541100	NA
	TraesCS2D02G387200	chr2D:492657404-492663218(+)	Sphingoid long-chain bases kinase 1	Os04g0541500	AT5G23450
	TraesCS2D02G387300	chr2D:492676247-492677882(+)	Homeobox protein, putative	Os04g0541700	NA
	TraesCS2D02G387400	chr2D:492713547-492715711(+)	Ubiquitin-specific protease family C19-related protein	Os04g0541900	NA
	TraesCS2D02G387500	chr2D:492900382-492901335(+)	senescence regulator (Protein of unknown function, DUF584)	Os04g0542000	NA
	TraesCS2D02G387600	chr2D:493003710-493008356(-)	NA	Os04g0542200	AT5G53550
	TraesCS2D02G387700	chr2D:493077613-493082231(-)	NA	Os04g0542200	AT5G53550
	TraesCS2D02G387800	chr2D:493173893-493177351(-)	NA	Os04g0542800	AT5G24380
	TraesCS2D02G387900	chr2D:493196169-493198991(+)	NA	Os04g0542900	AT4G17100
	TraesCS2D02G388000	chr2D:493199468-493201805(-)	Kinase family protein	Os04g0543000	AT4G17660
	TraesCS2D02G388100	chr2D:493512942-493521348(+)	Eukaryotic translation initiation factor 4G	NA	NA
	TraesCS2D02G388200	chr2D:493521755-493526341(-)	Casein kinase II subunit beta	Os10g0564900	AT4G17640
qBV3D.2	TraesCS3D02G463500	chr3D:567662527-567664450(-)	F-box family protein	NA	NA
	TraesCS3D02G463600	chr3D:567741512-567746320(-)	Wall-associated receptor kinase 2	Os08g0501088	NA
	TraesCS3D02G463700	chr3D:567842363-567855332(+)	Salicylate O-methyltransferase	NA	NA
	TraesCS3D02G463800	chr3D:567855334-567867966(-)	Leucine-rich repeat receptor-like protein kinase family protein	NA	AT5G21090
	TraesCS3D02G463900	chr3D:567902730-567903851(+)	F-box family protein	NA	NA
	TraesCS3D02G464000	chr3D:568005847-568007143(-)	F-box family protein	NA	NA
	TraesCS3D02G464100	chr3D:568008728-568011633(+)	F-box family protein	NA	NA
	TraesCS3D02G464200	chr3D:568041166-568042197(-)	nuclear pore anchor	NA	NA
	TraesCS3D02G464300	chr3D:568086787-568089312(-)	Jasmonate O-methyltransferase	NA	NA
	TraesCS3D02G464400	chr3D:568181581-568182270(+)	F-box family protein	NA	NA
	TraesCS3D02G464500	chr3D:568234922-568236055(+)	F-box family protein	NA	NA
	TraesCS3D02G464600	chr3D:568493674-568497001(+)	mediator of RNA polymerase II transcription subunit	NA	NA
	TraesCS3D02G464700	chr3D:568599327-568605230(-)	Sentrin-specific protease	NA	NA
	TraesCS3D02G464800	chr3D:568610950-568612096(+)	Sulfotransferase	Os09g0256100	NA
	TraesCS3D02G464900	chr3D:568654871-568656398(+)	NA	NA	NA
	TraesCS3D02G465000	chr3D:568836712-568837491(-)	E3 ubiquitin-protein ligase BRE1-like protein	Os10g0565600	AT1G55250
	TraesCS3D02G465100	chr3D:568841994-568849330(-)	E3 ubiquitin-protein ligase BRE1-like 2	Os10g0565600	NA
	TraesCS3D02G465200	chr3D:569118263-569119647(-)	F-box family protein	NA	NA
	TraesCS3D02G465300	chr3D:569128291-569129007(-)	F-box family protein	NA	NA
	TraesCS3D02G465400	chr3D:569132339-569134633(+)	F-box family protein	NA	NA
	TraesCS3D02G465500	chr3D:569466001-569467012(-)	F-box family protein	NA	NA
	TraesCS3D02G465600	chr3D:569522632-569528094(+)	Hydroxyethylthiazole kinase	NA	AT3G24030
	TraesCS3D02G465700	chr3D:569547066-569549250(-)	Late embryogenesis abundant (LEA) hydroxyproline-rich glycoprotein family	NA	NA
	TraesCS3D02G465800	chr3D:569555166-569556659(+)	ACT domain repeat 6	NA	NA
	TraesCS3D02G465900	chr3D:569569479-569572324(-)	UV-stimulated scaffold protein A-like protein	Os02g0293800	NA
	TraesCS3D02G466000	chr3D:569675698-569676744(-)	F-box domain containing protein, expressed	NA	NA
	TraesCS3D02G466100	chr3D:569781286-569790562(+)	E3 ubiquitin-protein ligase BRE1-like 2	Os10g0565600	NA
	TraesCS3D02G466300	chr3D:569900119-569901996(+)	Jasmonate O-methyltransferase	NA	NA
	TraesCS3D02G466400	chr3D:569931553-569932060(-)	3-oxo-5-alpha-steroid 4-dehydrogenase family protein	NA	AT4G26055
	TraesCS3D02G466500	chr3D:569976318-569977670(+)	Eukaryotic aspartyl protease family protein	Os01g0937050	NA
	TraesCS3D02G466600	chr3D:570036017-570037813(+)	Transcription factor tfiiic, tau55-like protein, putative	Os04g0530000	NA
	TraesCS3D02G466700	chr3D:570041595-570044537(-)	Embryogenesis transmembrane protein-like	Os12g0141000	NA
	TraesCS3D02G466800	chr3D:570111255-570111812(-)	Salicylate O-methyltransferase	Os06g0314600	NA
	TraesCS3D02G466900	chr3D:570144747-570148207(-)	Jasmonate O-methyltransferase	NA	NA
	TraesCS3D02G467000	chr3D:570158502-570159882(+)	NAC domain-containing protein	Os01g0946200	NA
	TraesCS3D02G467100	chr3D:570270967-570272518(+)	Basic 7S globulin 2	Os01g0937050	NA
	TraesCS3D02G467200	chr3D:570276805-570278279(-)	Basic 7S globulin 2	Os01g0937050	NA
	TraesCS3D02G467300	chr3D:570280982-570282418(+)	Basic 7S globulin	Os01g0937100	NA
	TraesCS3D02G467400	chr3D:570311668-570312258(+)	Basic 7S globulin 2	Os01g0937100	NA
	TraesCS3D02G467500	chr3D:570328433-570329644(+)	Eukaryotic aspartyl protease family protein	Os01g0937100	NA
	TraesCS3D02G467600	chr3D:570379079-570382349(+)	Basic 7S globulin	Os01g0937100	NA
	TraesCS3D02G467700	chr3D:570393635-570394941(+)	Basic 7S globulin 2	Os01g0937100	NA
	TraesCS3D02G467800	chr3D:570399910-570401342(-)	Basic 7S globulin 2	Os01g0937100	NA
	TraesCS3D02G467900	chr3D:570495162-570496385(-)	Basic 7S globulin 2	Os01g0937100	NA
	TraesCS3D02G468000	chr3D:570530421-570534710(+)	NA	Os07g0280200	NA
	TraesCS3D02G468100	chr3D:570559131-570560791(+)	Basic 7S globulin 2	Os01g0937100	NA
	TraesCS3D02G468200	chr3D:570570196-570571621(+)	Basic 7S globulin 2	Os01g0937800	NA
	TraesCS3D02G468300	chr3D:570772415-570774049(+)	Basic 7S globulin 2	Os01g0937600	NA
	TraesCS3D02G468400	chr3D:570801163-570803376(+)	Myb transcription factor	Os02g0189566	NA
	TraesCS3D02G468500	chr3D:570803687-570807001(-)	Transcription initiation factor TFIID subunit 9	Os03g0408500	AT1G54140
	TraesCS3D02G468600	chr3D:570838559-570840464(+)	Oral cancer overexpressed protein 1	Os07g0530300	NA
	TraesCS3D02G468700	chr3D:571014517-571014957(-)	NA	NA	NA
	TraesCS3D02G468800	chr3D:571132830-571139257(-)	NBS-LRR disease resistance protein-like	Os01g0937400	NA
	TraesCS3D02G468900	chr3D:571207950-571210815(+)	F-box protein (DUF295)	NA	NA
	TraesCS3D02G469000	chr3D:571211796-571212578(+)	Periplasmic nitrate reductase	NA	NA
	TraesCS3D02G469100	chr3D:571235770-571240717(-)	NA	Os01g0937300	NA
	TraesCS3D02G469200	chr3D:571361412-571377183(-)	Disease resistance protein (NBS-LRR class) family	Os01g0937400	NA
	TraesCS3D02G469300	chr3D:571493922-571503977(-)	NBS-LRR disease resistance protein-like	Os01g0937300	NA
	TraesCS3D02G469400	chr3D:571513671-571515285(+)	F-box protein	NA	NA
	TraesCS3D02G469500	chr3D:571556783-571568235(-)	Disease resistance protein (NBS-LRR class) family	Os01g0937400	NA
	TraesCS3D02G469600	chr3D:571592337-571592723(-)	Rpl2	CAA33925	NA
	TraesCS3D02G469700	chr3D:571592359-571592856(+)	50S ribosomal protein L2	CAA33928	ATCG00830
	TraesCS3D02G469800	chr3D:571592873-571593484(+)	NA	CAA33936	ATCG00820
	TraesCS3D02G469900	chr3D:571678281-571678748(+)	F-box protein	NA	NA
	TraesCS3D02G470000	chr3D:571822176-571823033(+)	Hydroxyproline-rich glycoprotein	Os01g0937900	NA
	TraesCS3D02G470100	chr3D:571991420-571995838(-)	Calcium-transporting ATPase	Os01g0939100	AT3G57330
	TraesCS3D02G470200	chr3D:572044810-572049410(-)	Sugar transporter, putative	Os07g0106200	AT3G19930
	TraesCS3D02G470300	chr3D:572100682-572103002(-)	Sugar transporter, putative	Os07g0106200	AT3G19930
	TraesCS3D02G470400	chr3D:572425625-572426051(-)	Phosphatidylinositol N-acetylglucosaminyltransferase subunit Y	Os01g0939000	NA
	TraesCS3D02G470500	chr3D:572487178-572490161(-)	Nascent polypeptide-associated complex subunit alpha-like protein	Os01g0938900	AT3G12390
	TraesCS3D02G470600	chr3D:572507731-572510389(-)	NA	Os01g0938900	AT3G12390
	TraesCS3D02G470700	chr3D:572739364-572744281(+)	Hydroxyproline-rich glycoprotein-like	Os01g0938600	NA
	TraesCS3D02G470800	chr3D:572790910-572793147(+)	Phosphatidylinositol N-acetylglucosaminyltransferase subunit Y	Os01g0939000	NA
	TraesCS3D02G470900	chr3D:573118693-573121867(+)	Phosphate transporter	Os12g0180100	AT5G44370
	TraesCS3D02G471000	chr3D:573402497-573404533(+)	Protein kinase	NA	NA
	TraesCS3D02G471100	chr3D:573682531-573685118(+)	NA	Os05g0324100	AT3G56330
	TraesCS3D02G471200	chr3D:573690171-573691639(+)	Pimeloyl-[acyl-carrier protein] methyl ester esterase	Os01g0636400	AT2G18360
	TraesCS3D02G471300	chr3D:573727564-573729042(+)	F-box family protein	NA	NA
	TraesCS3D02G471400	chr3D:573765225-573769738(-)	PAX-interacting protein 1	Os01g0939300	NA
	TraesCS3D02G471500	chr3D:573870662-573872668(-)	NA	Os03g0439500	NA
	TraesCS3D02G471600	chr3D:573906879-573908262(+)	Serpin family protein	NA	NA
	TraesCS3D02G471700	chr3D:573908401-573910897(-)	general regulatory factor 1	Os01g0939400	NA
	TraesCS3D02G471800	chr3D:573919525-573921227(-)	transmembrane protein, putative (DUF594)	NA	NA
	TraesCS3D02G471900	chr3D:573967000-573967545(+)	2-oxoglutarate (2OG) and Fe(II)-dependent oxygenase superfamily protein	Os03g0439500	NA
	TraesCS3D02G472000	chr3D:574118271-574125655(-)	Receptor-like protein kinase, putative,expressed	Os02g0472700	NA
	TraesCS3D02G472100	chr3D:574227779-574230495(+)	Eukaryotic peptide chain release factor subunit 1-1	Os01g0939500	AT1G12920
	TraesCS3D02G472200	chr3D:574238569-574239924(+)	Eukaryotic peptide chain release factor subunit 1-1	Os01g0939500	AT1G12920
	TraesCS3D02G472300	chr3D:574240699-574242199(-)	Leucine-rich repeat receptor-like kinase	Os11g0514500	NA
	TraesCS3D02G472400	chr3D:574424669-574427498(+)	Pentatricopeptide repeat-containing protein	Os01g0153250	AT1G63320
	TraesCS3D02G472500	chr3D:574484122-574485135(-)	F-box protein	NA	NA
	TraesCS3D02G472600	chr3D:574768130-574768957(-)	Disease resistance protein RPM1	NA	NA
	TraesCS3D02G472700	chr3D:574769011-574771238(-)	Disease resistance protein (TIR-NBS-LRR class) family	NA	NA
	TraesCS3D02G472800	chr3D:574779668-574780291(-)	Disease resistance protein RPP13	NA	NA
	TraesCS3D02G472900	chr3D:574781383-574782853(-)	disease resistance protein (TIR-NBS-LRR class) family protein	NA	NA
	TraesCS3D02G473000	chr3D:574821751-574827185(-)	S-formylglutathione hydrolase	Os01g0939700	AT2G41530
	TraesCS3D02G473100	chr3D:574854993-574856736(-)	Cortactin-binding protein 2	NA	NA
	TraesCS3D02G473200	chr3D:574857416-574858996(-)	Leucine-rich repeat receptor-like kinase	NA	NA
	TraesCS3D02G473300	chr3D:574888387-574889052(-)	CASP-like protein	NA	NA
	TraesCS3D02G473400	chr3D:574916504-574919777(+)	Potassium transporter	Os02g0518600	AT4G13420
	TraesCS3D02G473500	chr3D:574983642-574984838(+)	Tyrosyl-DNA phosphodiesterase 2	NA	NA
	TraesCS3D02G473600	chr3D:575125986-575130294(-)	Glycerol-3-phosphate dehydrogenase [NAD(+)]	Os01g0939600	AT2G41540
	TraesCS3D02G473700	chr3D:575478543-575482637(+)	NBS-LRR-like resistance protein	Os01g0947700	NA
	TraesCS3D02G473800	chr3D:575486939-575489166(+)	NA	NA	NA
	TraesCS3D02G473900	chr3D:575489220-575490047(+)	Disease resistance protein RPM1	NA	NA
	TraesCS3D02G474000	chr3D:575525832-575530855(+)	NA	Os01g0937300	NA
	TraesCS3D02G474100	chr3D:575535370-575535882(+)	Disease resistance protein RPP13	NA	NA
	TraesCS3D02G474200	chr3D:575536046-575537832(+)	NBS-LRR-like resistance protein	NA	NA
	TraesCS3D02G474300	chr3D:575545283-575549439(+)	NBS-LRR-like resistance protein	Os01g0937300	NA
	TraesCS3D02G474400	chr3D:575592525-575599914(-)	F-box protein	Os01g0946850	NA
	TraesCS3D02G474500	chr3D:575618108-575618815(+)	Arabinogalactan peptide 3	Os01g0559750	NA
	TraesCS3D02G474600	chr3D:575631389-575632891(+)	Cytochrome P450, putative, expressed	Os03g0140100	NA
	TraesCS3D02G474700	chr3D:575673684-575681453(+)	Pleiotropic drug resistance ABC transporter	Os01g0609300	AT1G15520
	TraesCS3D02G474800	chr3D:575725783-575727116(+)	Expansin protein	Os03g0102700	NA
	TraesCS3D02G474900	chr3D:575732638-575734176(-)	Cytochrome P450, putative, expressed	NA	NA
	TraesCS3D02G475000	chr3D:575736767-575738260(-)	Beta-1,3-glucanase	Os01g0947000	NA
	TraesCS3D02G475100	chr3D:575739377-575740827(-)	Beta-1,3-glucanase	Os01g0947000	NA
	TraesCS3D02G475200	chr3D:575758467-575760020(-)	Beta-1,3-glucanase	Os01g0940700	NA
	TraesCS3D02G475300	chr3D:575836105-575840581(-)	Bax inhibitor-1 family protein	Os07g0177300	AT1G03070
	TraesCS3D02G475400	chr3D:575847501-575853403(+)	NA	Os05g0345500	AT2G30600
	TraesCS3D02G475500	chr3D:575853412-575854346(-)	high chlorophyll fluorescence 153	Os01g0940600	NA
	TraesCS3D02G475600	chr3D:576563356-576570534(+)	Phosphotransferase	Os01g0940100	AT1G50460
	TraesCS3D02G475800	chr3D:576755407-576758217(-)	Cytokinin oxidase/dehydrogenase	Os01g0940000	AT2G41510
qBV5D	TraesCS5D02G524200	chr5D:543499669-543503819(-)	F-box domain containing protein	NA	NA
	TraesCS5D02G524300	chr5D:543507035-543508866(-)	F-box domain containing protein	NA	NA
	TraesCS5D02G524400	chr5D:543535686-543536675(-)	F-box domain containing protein	NA	NA
	TraesCS5D02G524500	chr5D:543585925-543587650(-)	L-threonine 3-dehydrogenase	NA	AT4G13010
	TraesCS5D02G524600	chr5D:543596185-543600775(-)	Phospholipase D	Os07g0260400	AT4G35790
	TraesCS5D02G524700	chr5D:543602251-543604197(-)	MICOS complex subunit Mic10-like protein (DUF543)	Os03g0840900	AT1G72170
	TraesCS5D02G524800	chr5D:543608944-543612338(-)	Protein kinase family protein	Os03g0841100	NA
	TraesCS5D02G524900	chr5D:543669600-543670664(-)	F-box family protein	NA	NA
	TraesCS5D02G525000	chr5D:543687440-543694159(-)	Protein kinase family protein	NA	NA
	TraesCS5D02G525200	chr5D:543746129-543748553(+)	BTB/POZ/MATH-domain protein	NA	NA
	TraesCS5D02G525300	chr5D:543771942-543772802(+)	Leucine-rich repeat receptor-like protein kinase	NA	NA
	TraesCS5D02G525400	chr5D:543776518-543777718(+)	Leucine-rich repeat receptor-like protein kinase	NA	NA
	TraesCS5D02G525500	chr5D:543803619-543804446(+)	Leucine-rich repeat receptor-like protein kinase	NA	NA
	TraesCS5D02G525600	chr5D:543817184-543818145(+)	Leucine-rich repeat receptor-like protein kinase	NA	NA
	TraesCS5D02G525700	chr5D:543830395-543831797(+)	Leucine-rich repeat receptor-like protein kinase	NA	NA
	TraesCS5D02G525800	chr5D:543835017-543838207(+)	F-box family protein	NA	NA
	TraesCS5D02G525900	chr5D:543838347-543843667(-)	NA	NA	NA
	TraesCS5D02G526000	chr5D:543856550-543859719(-)	F-box protein	NA	NA
	TraesCS5D02G526200	chr5D:544148899-544150516(+)	Leucine-rich repeat receptor-like protein kinase	NA	NA
	TraesCS5D02G526300	chr5D:544231277-544233104(+)	Leucine-rich repeat receptor-like protein kinase	NA	NA
	TraesCS5D02G526400	chr5D:544284634-544287390(-)	F-box protein	NA	NA
	TraesCS5D02G526500	chr5D:544457037-544459421(+)	F-box family protein	NA	NA
	TraesCS5D02G526600	chr5D:544459879-544461150(+)	Leucine-rich repeat receptor-like protein kinase	NA	NA
	TraesCS5D02G526700	chr5D:544477342-544481045(+)	F-box family protein	NA	NA
	TraesCS5D02G526800	chr5D:544481557-544483275(+)	Leucine-rich repeat receptor-like protein kinase family	NA	NA
	TraesCS5D02G526900	chr5D:544491355-544492183(+)	Ice recrystallization inhibition protein-like protein	NA	NA
	TraesCS5D02G527000	chr5D:544532579-544533793(+)	Leucine-rich repeat receptor-like protein kinase	NA	NA
	TraesCS5D02G527100	chr5D:544611899-544615156(+)	Prohibitin	Os03g0841700	AT4G28510
	TraesCS5D02G527300	chr5D:544625602-544629045(+)	F-box family protein	NA	NA
	TraesCS5D02G527400	chr5D:544629047-544629673(+)	Phosphoribosylformylglycinamidine synthase subunit PurL	NA	NA
	TraesCS5D02G527500	chr5D:544695877-544698087(-)	Receptor-like kinase	Os01g0116800	NA
	TraesCS5D02G527600	chr5D:544699439-544702185(+)	Receptor-like kinase	NA	NA
	TraesCS5D02G527700	chr5D:544799018-544800238(+)	Expansin	Os03g0428700	AT1G20190
	TraesCS5D02G527800	chr5D:544816816-544818118(+)	Expansin	Os03g0428700	AT1G20190
	TraesCS5D02G527900	chr5D:545111386-545112999(-)	Glycosyltransferase	Os03g0841600	NA
	TraesCS5D02G528000	chr5D:545122751-545124924(-)	Patatin	NA	NA
	TraesCS5D02G528100	chr5D:545145290-545147401(+)	Patatin	NA	NA
	TraesCS5D02G528300	chr5D:545207402-545209090(+)	3-ketoacyl-CoA synthase	Os09g0521100	NA
	TraesCS5D02G528400	chr5D:545210939-545215621(-)	Protein kinase	Os03g0841800	AT1G09840
	TraesCS5D02G528500	chr5D:545216117-545226761(-)	Carotenoid isomerase	Os03g0841900	AT1G57770
	TraesCS5D02G528600	chr5D:545280823-545284051(-)	O-methyltransferase	Os08g0157500	AT5G54160
	TraesCS5D02G528700	chr5D:545523515-545526025(+)	GrpE protein homolog	NA	NA
	TraesCS5D02G528800	chr5D:545533530-545534827(+)	Cortactin-binding protein 2	NA	NA
	TraesCS5D02G528900	chr5D:545764741-545766001(-)	transmembrane protein, putative (DUF594)	NA	NA
	TraesCS5D02G529000	chr5D:545921587-545923207(+)	Aspartic proteinase nepenthesin	NA	NA
	TraesCS5D02G529100	chr5D:545926550-545933137(+)	Vacuolar protein sorting-associated protein 9A	Os03g0842700	NA
	TraesCS5D02G529200	chr5D:545943087-545944933(-)	Short-chain dehydrogenase/reductase family protein	Os03g0842900	AT4G10020
	TraesCS5D02G529300	chr5D:545967656-545970026(+)	Ulp1 protease family, carboxy-terminal domain protein	NA	NA
	TraesCS5D02G529400	chr5D:546007810-546009523(-)	Protein kinase superfamily protein	NA	NA
	TraesCS5D02G529500	chr5D:546075053-546077276(-)	Ras-related protein, expressed	Os03g0843100	AT1G09630
	TraesCS5D02G529600	chr5D:546080634-546084588(+)	YacP-like NYN domain protein	Os03g0843200	NA
	TraesCS5D02G529700	chr5D:546084705-546087351(-)	Late embryogenesis abundant protein Lea14	Os03g0843300	AT2G44060
	TraesCS5D02G529800	chr5D:546302927-546304511(+)	Protein O-linked-mannose beta-1,4-N-acetylglucosaminyltransferase 2	NA	NA
	TraesCS5D02G529900	chr5D:546365855-546366582(+)	GCK domain-containing protein	NA	NA
	TraesCS5D02G530000	chr5D:546454980-546455603(+)	Proline-rich receptor-like protein kinase PERK1	NA	NA
	TraesCS5D02G530100	chr5D:546566054-546567836(+)	Tropinone reductase-like protein	NA	AT2G29370
	TraesCS5D02G530200	chr5D:546649028-546651269(+)	30S ribosomal protein S6	Os03g0843400	NA
	TraesCS5D02G530300	chr5D:546651779-546657365(-)	Luc7-like protein	Os03g0843500	AT5G17440
	TraesCS5D02G530400	chr5D:546678820-546681068(-)	Sister chromatid cohesion protein DCC1	Os05g0119600	AT2G44580
	TraesCS5D02G530500	chr5D:546682623-546684156(+)	NA	Os03g0843900	NA
	TraesCS5D02G530600	chr5D:546687753-546690173(+)	Serine/threonine-protein kinase	Os03g0844100	NA
	TraesCS5D02G530700	chr5D:546695539-546703266(+)	Ion channel DMI1	Os03g0843600	AT5G49960
	TraesCS5D02G530800	chr5D:546819301-546820725(+)	Thiopurine S-methyltransferase family protein, expressed	Os03g0843800	NA
	TraesCS5D02G530900	chr5D:546820679-546825262(-)	Poly(ADP-ribose) glycohydrolase 1	Os03g0843900	NA
	TraesCS5D02G531000	chr5D:546825426-546827787(+)	Pentatricopeptide repeat-containing protein	Os03g0844000	NA
	TraesCS5D02G531100	chr5D:546858080-546865594(+)	Zinc finger MYND domain-containing protein 15	Os07g0481000	AT1G70150
	TraesCS5D02G531200	chr5D:546906214-546913767(-)	Protein kinase-like protein	Os03g0844100	AT3G59350
	TraesCS5D02G531300	chr5D:546917879-546922510(+)	Serine/threonine protein phosphatase 2A regulatory subunit B	Os03g0844500	AT1G13460
	TraesCS5D02G531400	chr5D:546921823-546924651(-)	GDSL esterase/lipase	Os03g0844600	NA
	TraesCS5D02G531500	chr5D:547049137-547049953(+)	Elongation factor Tu	Os03g0844800	NA
	TraesCS5D02G531600	chr5D:547049945-547057967(-)	NA	Os03g0844700	NA
	TraesCS5D02G531700	chr5D:547065459-547067863(+)	Amino acid transporter, putative	Os03g0375966	AT3G13620
	TraesCS5D02G531800	chr5D:547069168-547071896(+)	ER lumen protein-retaining receptor	Os11g0473000	AT3G25040
	TraesCS5D02G531900	chr5D:547255987-547258068(+)	transmembrane protein, putative (DUF594)	NA	NA
	TraesCS5D02G532000	chr5D:547260823-547262224(-)	Pectate lyase	Os08g0286100	AT5G09280
	TraesCS5D02G532100	chr5D:547273461-547277281(-)	Polyribonucleotide nucleotidyltransferase	Os03g0844900	NA
	TraesCS5D02G532200	chr5D:547418179-547421464(+)	Erythronate-4-phosphate dehydrogenase family protein, putative	NA	NA
	TraesCS5D02G532300	chr5D:547430974-547431494(+)	Translation initiation factor 1A	Os03g0114200	AT2G40780
	TraesCS5D02G532400	chr5D:547436060-547460160(+)	NA	NA	NA
	TraesCS5D02G532500	chr5D:547501182-547528872(+)	Receptor-like protein kinase	NA	NA
	TraesCS5D02G532600	chr5D:547541975-547546825(+)	NA	Os02g0492900	NA
	TraesCS5D02G532700	chr5D:547606762-547610770(-)	ATP-dependent RNA helicase	Os03g0158200	AT3G53110
	TraesCS5D02G532800	chr5D:547704729-547715318(+)	Ankyrin repeat protein-like	NA	NA
	TraesCS5D02G532900	chr5D:547716315-547721425(-)	NA	NA	NA
	TraesCS5D02G533000	chr5D:547806911-547810799(+)	Eukaryotic aspartyl protease family protein	NA	NA
	TraesCS5D02G533100	chr5D:547839680-547841503(-)	Pirin-like protein	Os03g0845000	AT3G59220
	TraesCS5D02G533200	chr5D:547882596-547884329(-)	Pirin-like protein	Os03g0845000	AT2G43120
	TraesCS5D02G533400	chr5D:547891364-547893112(-)	Pirin-like protein	Os03g0845000	AT2G43120
	TraesCS5D02G533500	chr5D:547924781-547926716(-)	Pirin-like protein	Os03g0845000	AT2G43120
	TraesCS5D02G533600	chr5D:547984056-547987307(-)	RNA binding protein	NA	NA
	TraesCS5D02G533700	chr5D:547995847-548004609(-)	Long-chain-fatty-acid CoA ligase, putative	Os03g0845500	AT3G23790
	TraesCS5D02G533800	chr5D:548022328-548031311(-)	NA	Os03g0845500	AT3G23790
	TraesCS5D02G534000	chr5D:548348572-548354652(+)	NA	Os03g0847600	NA
	TraesCS5D02G534100	chr5D:548362023-548369486(+)	myb-like protein X	Os03g0847800	NA
	TraesCS5D02G534200	chr5D:548460504-548461745(+)	ROP-interactive CRIB motif protein	Os03g0847900	NA
	TraesCS5D02G534300	chr5D:548479492-548480622(+)	ROP-interactive CRIB motif protein	Os03g0847900	NA
	TraesCS5D02G534400	chr5D:548483000-548485474(-)	Purple acid phosphatase	NA	NA
	TraesCS5D02G534500	chr5D:548623922-548629223(-)	GPI transamidase subunit PIG-U family protein	Os02g0688900	AT1G63110
	TraesCS5D02G534600	chr5D:548878906-548884637(-)	Aspartokinase	Os03g0850400	AT5G13280
	TraesCS5D02G534700	chr5D:548953413-548954021(-)	Invertase inhibitor	NA	NA
	TraesCS5D02G534800	chr5D:548972170-548973846(-)	transmembrane protein, putative (DUF594)	Os05g0508500	NA
	TraesCS5D02G534900	chr5D:548979329-548981302(-)	Ubiquitin carboxyl-terminal hydrolase 2	Os05g0508500	NA
	TraesCS5D02G535000	chr5D:548989293-548991731(+)	Ubiquitin carboxyl-terminal hydrolase 2	Os05g0508500	NA
	TraesCS5D02G535100	chr5D:549228079-549229787(-)	Cytochrome P450	Os03g0850200	AT4G39950
	TraesCS5D02G535200	chr5D:549260395-549262167(-)	Cytochrome P450	Os04g0174100	AT4G39950
	TraesCS5D02G535300	chr5D:549308379-549309601(+)	RING/U-box superfamily protein	Os02g0178600	NA
	TraesCS5D02G535400	chr5D:549323862-549325912(+)	Cytochrome P450	Os03g0850200	NA
	TraesCS5D02G535500	chr5D:549329889-549331313(-)	Expansin	Os05g0277000	AT4G01630
	TraesCS5D02G535600	chr5D:549428485-549430245(-)	Cytochrome P450	Os03g0850200	AT4G39950
	TraesCS5D02G535700	chr5D:549546567-549548330(-)	Cytochrome P450	Os04g0174100	AT4G39950
	TraesCS5D02G535800	chr5D:549573707-549579551(+)	CTD small phosphatase-like protein	Os03g0850100	AT5G11860
	TraesCS5D02G535900	chr5D:549581669-549587267(+)	disease resistance protein (TIR-NBS-LRR class)	NA	NA
	TraesCS5D02G536000	chr5D:549629652-549631494(+)	NA	Os03g0850000	NA
	TraesCS5D02G536100	chr5D:549631107-549635538(-)	Mitochondrial carrier protein, putative	Os05g0361900	AT4G39460
	TraesCS5D02G536200	chr5D:549646796-549648756(+)	Glycosyltransferase	Os03g0849900	NA
	TraesCS5D02G536300	chr5D:549654910-549655134(+)	MAM domain-containing glycosylphosphatidylinositol anchor protein 2	NA	NA
	TraesCS5D02G536400	chr5D:549655745-549657737(-)	NA	Os03g0849900	NA
	TraesCS5D02G536500	chr5D:549770404-549774158(-)	Glycosyltransferase	Os03g0849800	NA
	TraesCS5D02G536600	chr5D:549806349-549807205(+)	Pollen allergen Cyn d 23	NA	NA
	TraesCS5D02G536700	chr5D:549849396-549855426(+)	Conserved oligomeric Golgi complex subunit 2	Os03g0849600	AT4G24840
	TraesCS5D02G536800	chr5D:549855390-549858761(-)	RPM1-interacting protein 4	Os03g0848600	NA
	TraesCS5D02G536900	chr5D:549862326-549868496(+)	Protein kinase family protein	Os10g0162836	NA
	TraesCS5D02G537000	chr5D:549869123-549870994(+)	receptor kinase 1	NA	NA
	TraesCS5D02G537100	chr5D:549872843-549874437(+)	Protein kinase family protein	Os03g0844100	NA
	TraesCS5D02G537200	chr5D:549876508-549880647(+)	Protein kinase family protein	NA	NA
	TraesCS5D02G537300	chr5D:549886841-549890014(+)	B-cell receptor-associated protein 31-like containing protein	Os03g0848400	AT5G48660
	TraesCS5D02G537400	chr5D:550148997-550150349(+)	U3 small nucleolar RNA-associated protein 18-like protein	NA	NA
	TraesCS5D02G537500	chr5D:550151653-550154538(+)	Sucrose transporter	Os02g0576600	NA
	TraesCS5D02G537600	chr5D:550184040-550191990(+)	Aspartokinase	NA	NA
	TraesCS5D02G537700	chr5D:550204524-550206336(+)	Integral membrane protein	Os03g0850600	AT1G28140
	TraesCS5D02G537800	chr5D:550299845-550301021(-)	Glycine rich protein 3	NA	NA
	TraesCS5D02G537900	chr5D:550373280-550374468(-)	Glycine rich protein 3	NA	NA
	TraesCS5D02G538000	chr5D:550400969-550402526(-)	Glycine rich protein 3	NA	NA
	TraesCS5D02G538200	chr5D:550436989-550444336(+)	NA	Os08g0200400	NA
	TraesCS5D02G538300	chr5D:550509636-550512440(-)	Sec14p-like phosphatidylinositol transfer family protein	Os03g0850700	AT1G01630
	TraesCS5D02G538400	chr5D:550576252-550576764(-)	40S ribosomal protein	Os01g0250600	AT1G57540
	TraesCS5D02G538500	chr5D:550578051-550580048(-)	Sec14p-like phosphatidylinositol transfer family protein	Os03g0850700	AT1G01630
	TraesCS5D02G538600	chr5D:550610875-550612488(-)	Sec14p-like phosphatidylinositol transfer family protein	Os03g0850700	AT1G01630
	TraesCS5D02G538700	chr5D:550637277-550639047(-)	Sec14p-like phosphatidylinositol transfer family protein	Os03g0850700	AT1G01630
	TraesCS5D02G538800	chr5D:550639426-550643635(-)	Transferase, transferring glycosyl groups	Os03g0850800	AT3G23760
	TraesCS5D02G538900	chr5D:550646167-550647143(+)	Basic blue protein	Os03g0850900	AT2G02850
	TraesCS5D02G539000	chr5D:550660636-550661377(+)	Basic blue protein, putative	Os03g0850900	NA
	TraesCS5D02G539100	chr5D:550922006-550953048(+)	NA	NA	NA
	TraesCS5D02G539200	chr5D:550964729-550965417(+)	Basic blue protein	Os03g0850900	NA
	TraesCS5D02G539300	chr5D:551016402-551021005(-)	2-oxoglutarate (2OG) and Fe(II)-dependent oxygenase superfamily protein	NA	NA
	TraesCS5D02G539400	chr5D:551021496-551021902(-)	Ubiquitin-fold modifier-conjugating enzyme 1	NA	NA
	TraesCS5D02G539500	chr5D:551024562-551025407(+)	Basic blue protein, putative	Os03g0850900	NA
	TraesCS5D02G539600	chr5D:551057521-551059886(+)	NA	NA	NA
	TraesCS5D02G539700	chr5D:551073776-551075597(+)	F-box family protein	NA	NA
	TraesCS5D02G539800	chr5D:551084946-551086895(-)	F-box family protein	NA	NA
	TraesCS5D02G539900	chr5D:551120033-551121290(+)	F-box domain containing protein, expressed	NA	NA
	TraesCS5D02G540000	chr5D:551242362-551244220(-)	Glycosyltransferase	Os10g0122000	NA
	TraesCS5D02G540100	chr5D:551447654-551449330(+)	F-box domain containing protein, expressed	NA	NA
	TraesCS5D02G540200	chr5D:551467456-551470264(-)	F-box family protein	NA	NA
	TraesCS5D02G540300	chr5D:551543850-551546279(-)	F-box/RNI-like superfamily protein	NA	NA
	TraesCS5D02G540400	chr5D:551744385-551746234(+)	F-box family protein	NA	NA
	TraesCS5D02G540500	chr5D:551830756-551837735(+)	NBS-LRR disease resistance protein-like	NA	NA
	TraesCS5D02G540600	chr5D:551880156-551881355(+)	NBS-LRR disease resistance protein-like protein	NA	NA
	TraesCS5D02G540700	chr5D:551924615-551925247(-)	TRAF-like superfamily protein	NA	NA
	TraesCS5D02G540800	chr5D:551990390-551994460(+)	Cinnamoyl-CoA reductase 4	Os01g0528800	AT5G19440
	TraesCS5D02G540900	chr5D:552027448-552028660(-)	Structural maintenance of chromosomes protein	NA	NA
	TraesCS5D02G541000	chr5D:552031887-552033725(-)	F-box domain containing protein	NA	NA
	TraesCS5D02G541100	chr5D:552036203-552047398(+)	Cinnamoyl-CoA reductase 4	Os01g0528800	AT5G19440
	TraesCS5D02G541200	chr5D:552040877-552042532(-)	F-box family protein	NA	NA
	TraesCS5D02G541300	chr5D:552049622-552051718(-)	NA	NA	NA
	TraesCS5D02G541400	chr5D:552052462-552052892(+)	Homoserine kinase	NA	NA
	TraesCS5D02G541500	chr5D:552127438-552129803(-)	FBD-associated F-box protein	NA	NA
	TraesCS5D02G541600	chr5D:552407352-552409908(+)	Disease resistance protein (CC-NBS-LRR class) family	NA	NA
	TraesCS5D02G541700	chr5D:552420976-552422850(-)	F-box family protein	NA	NA
	TraesCS5D02G541800	chr5D:552442265-552444243(-)	F-box and associated interaction domains-containing protein	NA	NA
	TraesCS5D02G541900	chr5D:552683347-552688698(+)	NA	NA	NA
	TraesCS5D02G542000	chr5D:552697172-552699153(-)	nodulin MtN21 /EamA-like transporter family protein	NA	NA
	TraesCS5D02G542100	chr5D:552707655-552711763(+)	F-box/RNI-like superfamily protein	NA	NA
	TraesCS5D02G542200	chr5D:552729006-552731184(+)	F-box family protein	NA	NA
	TraesCS5D02G542300	chr5D:552781100-552784999(-)	Elongation factor Tu	Os03g0851100	AT4G02930
	TraesCS5D02G542400	chr5D:552789118-552792885(+)	Glutaredoxin	Os03g0851200	AT3G54900
	TraesCS5D02G542500	chr5D:552857038-552861276(-)	NBS-LRR disease resistance protein-like protein	NA	NA
	TraesCS5D02G542600	chr5D:552916586-552920893(+)	Receptor-like protein kinase	Os05g0524732	NA
	TraesCS5D02G542700	chr5D:553059995-553061105(-)	protein kinase family protein	NA	NA
	TraesCS5D02G542800	chr5D:553064001-553065104(+)	Protein kinase family protein	Os06g0581500	NA
	TraesCS5D02G542900	chr5D:553421483-553421944(-)	BLN1-3	NA	NA
	TraesCS5D02G543000	chr5D:553469660-553473445(+)	Receptor-kinase, putative	Os08g0331900	NA
qBV6B.1	TraesCS6B02G345700	chr6B:609372737-609375415(+)	SNW domain-containing protein 1	Os02g0759800	AT1G77180
	TraesCS6B02G345800	chr6B:609379731-609383222(-)	Transport inhibitor response 1-like protein	Os02g0759700	AT5G49980
	TraesCS6B02G345900	chr6B:609841167-609846504(-)	Pentatricopeptide repeat-containing protein	Os02g0759500	AT1G73400
	TraesCS6B02G346000	chr6B:609854033-609855241(-)	E3 ubiquitin-protein ligase	Os02g0759400	AT4G09100
	TraesCS6B02G346100	chr6B:609886384-609888238(+)	Basic helix-loop-helix transcription factor	Os02g0759000	AT5G65320
	TraesCS6B02G346200	chr6B:609925034-609926074(+)	Blue copper protein	Os02g0758800	AT1G22480
	TraesCS6B02G346300	chr6B:610064940-610065673(+)	transcriptional factor B3 family protein	Os02g0758200	NA
	TraesCS6B02G346400	chr6B:610085279-610086236(+)	cyclin a2;1	Os02g0758200	AT5G65300
	TraesCS6B02G346500	chr6B:610233534-610241805(-)	LMBR1 domain-containing 2	Os02g0758100	AT5G65290
	TraesCS6B02G346600	chr6B:610804613-610807774(+)	Myb/SANT-like DNA-binding domain protein	NA	NA
	TraesCS6B02G346700	chr6B:610808586-610809673(-)	Heat-shock protein, putative	Os02g0758000	NA
	TraesCS6B02G346800	chr6B:610810130-610815679(+)	NA	Os02g0757900	AT5G10350
	TraesCS6B02G346900	chr6B:610816393-610817448(+)	NBS-LRR disease resistance protein	NA	NA
	TraesCS6B02G347000	chr6B:611347959-611349662(-)	F-box protein-like	Os02g0757700	AT4G08980
	TraesCS6B02G347100	chr6B:611460347-611461691(-)	Protein EXORDIUM-like 1	Os02g0757100	AT4G08950
	TraesCS6B02G347200	chr6B:611499966-611501337(+)	Protein EXORDIUM-like 1	Os02g0756800	AT4G08950
	TraesCS6B02G347300	chr6B:611504331-611505278(+)	Protein EXORDIUM-like 1	Os02g0756600	AT4G08950
	TraesCS6B02G347400	chr6B:611698227-611699819(+)	Protein EXORDIUM-like 1	Os02g0756200	AT4G08950
	TraesCS6B02G347500	chr6B:612133102-612134230(+)	EPIDERMAL PATTERNING FACTOR-like protein	Os02g0756100	AT5G10310
	TraesCS6B02G347600	chr6B:612197715-612198075(+)	Lipid transfer protein	NA	NA
	TraesCS6B02G347700	chr6B:612269780-612271572(-)	Glycosyltransferase	Os02g0755900	AT1G22360
	TraesCS6B02G347800	chr6B:612743089-612745301(-)	Glycosyltransferase	Os02g0755900	AT1G22400
	TraesCS6B02G347900	chr6B:612847863-612849777(+)	Glycosyltransferase	Os02g0755600	AT1G22360
	TraesCS6B02G348000	chr6B:612857305-612859019(+)	Glycosyltransferase	Os02g0755500	AT1G22370
	TraesCS6B02G348100	chr6B:612859070-612864954(-)	RNA-binding protein	Os02g0755400	AT1G22330
	TraesCS6B02G348200	chr6B:613108356-613111868(-)	Pterin-4-alpha-carbinolamine dehydratase	Os01g0663500	AT1G29810
	TraesCS6B02G348300	chr6B:613112037-613114907(+)	Lysine-specific histone demethylase 1-1-like protein	Os02g0755200	NA
	TraesCS6B02G348400	chr6B:613160278-613161225(-)	Maturase	BAC19891	ATMG00520
	TraesCS6B02G348500	chr6B:613162866-613163120(-)	Na(+)-translocating NADH-quinone reductase subunit F	NA	NA
	TraesCS6B02G348600	chr6B:613187455-613187823(-)	Orf101b	NA	NA
	TraesCS6B02G348700	chr6B:613291487-613298000(+)	S-adenosyl-L-methionine-dependent methyltransferases superfamily protein	Os02g0755000	AT1G78240
	TraesCS6B02G348800	chr6B:613298657-613301334(+)	NA	Os02g0754900	AT4G08930
	TraesCS6B02G348900	chr6B:613573348-613574806(-)	BTB/POZ domain protein	Os02g0754600	NA
	TraesCS6B02G349000	chr6B:613575218-613588354(-)	Glutamyl-tRNA(Gln) amidotransferase subunit A	Os02g0754500	AT5G09420
	TraesCS6B02G349100	chr6B:613610075-613611466(+)	Myb transcription factor	Os08g0433400	AT5G10280
	TraesCS6B02G349200	chr6B:614127307-614128893(+)	Myb transcription factor	Os08g0433400	AT5G10280
	TraesCS6B02G349300	chr6B:614130320-614133168(-)	50S ribosomal protein L29	Os02g0754300	NA
	TraesCS6B02G349400	chr6B:614305597-614310667(+)	DIS3-like exonuclease 2	Os02g0754100	NA
	TraesCS6B02G349500	chr6B:614311734-614313383(+)	Alpha-amylase	Os02g0765400	AT4G25000
	TraesCS6B02G349600	chr6B:614435764-614436219(-)	dicarboxylate transporter 1	NA	NA
	TraesCS6B02G349700	chr6B:614436986-614438709(+)	Alpha-amylase	Os02g0765400	AT4G25000
	TraesCS6B02G349800	chr6B:614582063-614583768(+)	Alpha-amylase	Os02g0765400	AT4G25000
	TraesCS6B02G349900	chr6B:615086071-615087667(-)	LRR and NB-ARC domains-containing disease resistance protein	NA	NA
	TraesCS6B02G350000	chr6B:615166995-615167808(+)	Ethylene-responsive transcription factor	Os02g0764700	NA
	TraesCS6B02G350100	chr6B:615230245-615231076(+)	Ethylene-responsive transcription factor	Os02g0764700	NA
	TraesCS6B02G350200	chr6B:615253158-615257586(+)	F-box domain containing protein-like	NA	NA
	TraesCS6B02G350300	chr6B:615318055-615323841(-)	Myb/SANT-like DNA-binding domain protein	NA	NA
	TraesCS6B02G350400	chr6B:615605331-615606561(+)	Ethylene-responsive transcription factor	Os02g0764700	NA
	TraesCS6B02G350500	chr6B:615636611-615638202(+)	Chlorophyll a-b binding protein, chloroplastic	Os02g0764500	AT1G45474
	TraesCS6B02G350600	chr6B:615638072-615641589(-)	Galactoside 2-alpha-L-fucosyltransferase	Os02g0764400	AT2G03220
	TraesCS6B02G350700	chr6B:615964852-615971424(+)	SprT-like domain-containing protein Spartan	NA	NA
	TraesCS6B02G350800	chr6B:615978204-615995724(-)	RNA polymerase-associated CTR9-like protein	Os07g0476200	NA
	TraesCS6B02G350900	chr6B:616323627-616326662(+)	Galactoside 2-alpha-L-fucosyltransferase	Os02g0763900	NA
	TraesCS6B02G351000	chr6B:616426337-616428825(-)	Galactoside 2-alpha-L-fucosyltransferase	Os02g0764200	NA
	TraesCS6B02G351100	chr6B:616429597-616430124(-)	Peroxidase	NA	NA
	TraesCS6B02G351200	chr6B:616432400-616449765(-)	Galactoside 2-alpha-L-fucosyltransferase	Os02g0763900	NA
	TraesCS6B02G351300	chr6B:616865947-616869408(+)	Galactoside 2-alpha-L-fucosyltransferase	Os02g0763200	NA
	TraesCS6B02G351400	chr6B:616944241-616946066(+)	Galactoside 2-alpha-L-fucosyltransferase	Os02g0763800	NA
	TraesCS6B02G351500	chr6B:617031092-617031991(+)	CAI-1 autoinducer sensor kinase/phosphatase cqsS isoform 1	NA	NA
	TraesCS6B02G351600	chr6B:617037929-617039659(+)	2-oxoglutarate (2OG) and Fe(II)-dependent oxygenase superfamily protein	Os06g0178500	NA
	TraesCS6B02G351700	chr6B:617112210-617113352(-)	Plant cadmium resistance 2	Os02g0763000	AT5G35525
	TraesCS6B02G351800	chr6B:617128423-617128713(+)	Calcium binding family protein	NA	NA
	TraesCS6B02G351900	chr6B:617170393-617183405(+)	DNA repair/recombination protein	Os02g0762800	AT3G19210
	TraesCS6B02G352000	chr6B:617184399-617185990(+)	membrane-associated kinase regulator-like protein	Os02g0762600	NA
	TraesCS6B02G352100	chr6B:617644498-617646161(-)	Cyclin-dependent kinase inhibitor	Os02g0762400	NA
	TraesCS6B02G352300	chr6B:617979561-617984238(-)	Phenylalanine--tRNA ligase alpha subunit	Os10g0400800	AT4G39280
	TraesCS6B02G352400	chr6B:618125158-618130610(+)	NA	Os02g0761700	AT4G37040
	TraesCS6B02G352500	chr6B:618131133-618137910(+)	Peptidyl-prolyl cis-trans isomerase	Os02g0761600	AT4G33380
	TraesCS6B02G352600	chr6B:618330421-618331395(-)	Receptor-like protein kinase	NA	NA
	TraesCS6B02G352700	chr6B:618332135-618337290(-)	Protein kinase family protein, putative, expressed	Os12g0562600	NA
	TraesCS6B02G352800	chr6B:618666635-618667500(+)	Oxidoreductase/transition metal ion-binding protein	Os02g0775300	NA
	TraesCS6B02G353000	chr6B:618935448-618935735(+)	B3 domain-containing protein family	NA	NA
	TraesCS6B02G353100	chr6B:618936336-618940080(+)	NA	Os02g0775200	AT1G77470
	TraesCS6B02G353200	chr6B:618942386-618945171(-)	NA	Os06g0215900	AT1G76690
	TraesCS6B02G353300	chr6B:619023716-619025809(-)	Metal tolerance protein	Os02g0775100	AT3G58060
	TraesCS6B02G353400	chr6B:619030620-619032741(-)	Glycosyltransferase family 92 protein	NA	NA
	TraesCS6B02G353500	chr6B:619404619-619405226(+)	transmembrane protein	Os02g0774200	NA
	TraesCS6B02G353600	chr6B:619483882-619484517(+)	Transmembrane protein, putative	Os02g0774200	NA
	TraesCS6B02G353700	chr6B:619492681-619494113(-)	Thioredoxin	Os02g0774100	NA
	TraesCS6B02G353800	chr6B:619525687-619529993(+)	Protein trichome birefringence	Os02g0773732	NA
	TraesCS6B02G353900	chr6B:619719219-619721667(+)	Growth-regulating factor	Os02g0773600	NA
	TraesCS6B02G354000	chr6B:619728551-619729642(+)	Temperature-induced lipocalin	Os08g0440100	AT5G58070
	TraesCS6B02G354100	chr6B:619861244-619862517(+)	Protein PAM68, chloroplastic-like protein	Os02g0773500	NA
	TraesCS6B02G354200	chr6B:620174465-620184681(-)	NA	Os02g0773400	NA
	TraesCS6B02G354300	chr6B:620261047-620264596(+)	1-aminocyclopropane-1-carboxylate deaminase/D-cysteine desulfhydrase	Os02g0773300	AT1G48420
	TraesCS6B02G354400	chr6B:620264708-620265976(-)	Universal stress protein family protein	Os02g0773200	AT3G53990
	TraesCS6B02G354500	chr6B:620281211-620284081(-)	Cytochrome P450, putative	NA	NA
	TraesCS6B02G354600	chr6B:620707011-620710511(-)	Peroxidase	Os01g0378100	NA
	TraesCS6B02G354700	chr6B:622725092-622727408(+)	Protein XRI1	NA	NA
	TraesCS6B02G354800	chr6B:622729856-622739265(-)	UPF0614 C14orf102-like protein	Os02g0772500	NA
	TraesCS6B02G354900	chr6B:623080774-623084880(-)	NA	Os06g0208100	AT1G73360
	TraesCS6B02G355000	chr6B:623368982-623369821(+)	Embryogenesis-associated protein EMB8	NA	NA
	TraesCS6B02G355200	chr6B:623445433-623446316(+)	Disease-resistance protein RAR1	NA	NA
	TraesCS6B02G355300	chr6B:623442845-623448995(-)	N-acetyltransferase	Os02g0772300	NA
	TraesCS6B02G355400	chr6B:623689954-623696879(-)	Transcription elongation factor SPT5	Os02g0772000	AT4G08350
	TraesCS6B02G355500	chr6B:623724865-623730551(+)	NA	Os02g0771800	NA
	TraesCS6B02G355600	chr6B:623739703-623742959(+)	Glucan endo-1,3-beta-glucosidase 3	Os02g0771700	AT2G05790
	TraesCS6B02G355700	chr6B:624017273-624019350(-)	1-aminocyclopropane-1-carboxylate oxidase	Os02g0771600	AT1G05010
	TraesCS6B02G355800	chr6B:624177393-624178922(-)	1-aminocyclopropane-1-carboxylate oxidase	Os02g0771600	AT1G05010
	TraesCS6B02G355900	chr6B:624311966-624313762(-)	1-aminocyclopropane-1-carboxylate oxidase	Os02g0771600	AT1G05010
	TraesCS6B02G356000	chr6B:624402309-624409704(-)	1-aminocyclopropane-1-carboxylate oxidase	Os02g0771600	AT1G05010
	TraesCS6B02G356200	chr6B:624495761-624497229(-)	1-aminocyclopropane-1-carboxylate oxidase	Os02g0771600	AT1G05010
	TraesCS6B02G356300	chr6B:624785937-624787558(+)	DNA-binding storekeeper protein-related transcriptional regulator	Os02g0771200	NA
	TraesCS6B02G356400	chr6B:624795560-624801969(+)	E3 ubiquitin-protein ligase COP1	Os02g0771100	AT2G32950
	TraesCS6B02G356500	chr6B:624802610-624803729(-)	P-type ATP-ase 1	NA	NA
	TraesCS6B02G356600	chr6B:624860399-624866402(-)	Reticulon-like protein	NA	NA
	TraesCS6B02G356700	chr6B:624882519-624883465(-)	Pimeloyl-[acyl-carrier protein] methyl ester esterase	NA	NA
	TraesCS6B02G356800	chr6B:625241370-625244779(+)	Nitrate reductase	Os02g0770800	AT1G77760
	TraesCS6B02G356900	chr6B:625365345-625378820(+)	Separase, putative	Os02g0770700	NA
	TraesCS6B02G357000	chr6B:625379434-625381386(-)	zinc finger/BTB domain protein, putative (DUF1644)	Os02g0770600	AT4G08460
	TraesCS6B02G357100	chr6B:625536808-625537254(-)	30S ribosomal protein S7, putative	BAC19857	AT2G07696
	TraesCS6B02G357200	chr6B:625615895-625616122(-)	NAD(P)H-quinone oxidoreductase subunit 2, chloroplastic	CAA33920	NA
	TraesCS6B02G357300	chr6B:625616422-625616802(-)	30S ribosomal protein S7	CAA33919	ATCG00900
	TraesCS6B02G357400	chr6B:625649936-625650760(+)	Cytochrome c biogenesis Fc	BAC19894	ATMG00180
	TraesCS6B02G357500	chr6B:625652165-625652464(-)	early nodulin-like protein 10	NA	NA
	TraesCS6B02G357600	chr6B:625778598-625781138(-)	WRKY transcription factor, putative	Os02g0770500	NA
	TraesCS6B02G357700	chr6B:625884650-625885787(-)	Myb family transcription factor family protein	NA	NA
	TraesCS6B02G357800	chr6B:625886934-625891359(-)	Short-chain dehydrogenase/reductase family protein	Os03g0654600	AT5G04900
	TraesCS6B02G357900	chr6B:626212094-626216999(+)	26S proteasome non-atpase regulatory subunit, putative	Os07g0435100	AT1G64520
	TraesCS6B02G358000	chr6B:626450360-626454459(+)	NA	Os02g0770100	NA
	TraesCS6B02G358100	chr6B:626456415-626458167(-)	Pentatricopeptide repeat-containing protein	Os02g0769900	NA
	TraesCS6B02G358300	chr6B:626488227-626525215(-)	Glycosyltransferase	Os05g0527200	NA
	TraesCS6B02G358400	chr6B:626589140-626590604(-)	Pentatricopeptide repeat-containing protein	Os02g0769900	NA
	TraesCS6B02G358600	chr6B:626811889-626813569(+)	Pentatricopeptide repeat-containing protein	Os02g0769900	NA
	TraesCS6B02G358700	chr6B:626882497-626883963(+)	Pentatricopeptide repeat-containing protein	Os02g0769900	NA
	TraesCS6B02G358800	chr6B:626886420-626892443(-)	Protein kinase	Os02g0769800	AT4G08500
	TraesCS6B02G358900	chr6B:630465584-630465913(-)	Chaperone protein dnaJ-like protein	Os02g0506600	NA
	TraesCS6B02G359000	chr6B:630504675-630504998(-)	Chaperone dnaJ-like protein	Os02g0506600	NA
	TraesCS6B02G359100	chr6B:630529246-630529557(-)	Chaperone dnaJ-like protein	Os02g0506600	NA
	TraesCS6B02G359200	chr6B:630540268-630541165(+)	Kinesin heavy chain, putative isoform 1	NA	NA
	TraesCS6B02G359300	chr6B:630846675-630849877(+)	LysM domain-containing GPI-anchored protein 1	Os02g0769200	AT1G21880
	TraesCS6B02G359400	chr6B:631193221-631194157(+)	Auxin-responsive family protein	Os02g0769100	NA
	TraesCS6B02G359500	chr6B:631200466-631203676(-)	LysM domain-containing GPI-anchored protein 1	Os02g0769200	AT1G21880
	TraesCS6B02G359600	chr6B:631245209-631246198(-)	Auxin-responsive family protein	Os02g0769100	NA
	TraesCS6B02G359700	chr6B:631534462-631534815(-)	SAUR-like auxin-responsive family protein	Os02g0769100	NA
	TraesCS6B02G359800	chr6B:631740171-631741196(-)	Auxin-responsive family protein	Os02g0769100	NA
	TraesCS6B02G359900	chr6B:631843546-631843908(-)	Auxin-responsive family protein	Os02g0769100	NA
	TraesCS6B02G360000	chr6B:631950723-631967302(-)	NA	Os02g0768800	NA
	TraesCS6B02G360100	chr6B:632176561-632179355(+)	DNA-binding storekeeper protein-related transcriptional regulator, putative	Os02g0768700	NA
	TraesCS6B02G360200	chr6B:632179674-632182484(-)	Ethylene receptor	NA	NA
	TraesCS6B02G360300	chr6B:632182793-632188473(-)	Inorganic pyrophosphatase	Os02g0768600	AT5G09650
	TraesCS6B02G360400	chr6B:632241128-632244382(+)	WAT1-related protein	Os02g0768300	AT4G08300
	TraesCS6B02G360500	chr6B:632304665-632305774(+)	WAT1-related protein	Os02g0768300	AT4G08300
	TraesCS6B02G360600	chr6B:632419861-632423528(+)	WAT1-related protein	Os02g0768300	AT4G08300
	TraesCS6B02G360700	chr6B:632502656-632504809(+)	WAT1-related protein	Os02g0768300	AT4G08290
	TraesCS6B02G360800	chr6B:632563923-632566684(+)	WAT1-related protein	Os02g0768300	AT4G08300
	TraesCS6B02G360900	chr6B:632786075-632788585(+)	WAT1-related protein	Os02g0768300	AT4G08300
	TraesCS6B02G361000	chr6B:632848627-632851095(+)	Transmembrane emp24 domain-containing protein	Os02g0768200	AT1G21900
	TraesCS6B02G361100	chr6B:632878151-632880112(+)	Hydroxyproline-rich glycoprotein family protein, putative	Os02g0768000	NA
	TraesCS6B02G361200	chr6B:632881153-632882406(-)	Glutaredoxin-like protein	Os02g0767900	AT4G08280
	TraesCS6B02G361300	chr6B:632882579-632885952(+)	Transcription factor TFIIIB component B	NA	NA
	TraesCS6B02G361400	chr6B:632954631-632955979(+)	Ethylene-responsive transcription factor	Os02g0767800	AT1G21910
	TraesCS6B02G361500	chr6B:632961967-632966487(+)	NA	Os02g0767700	NA
	TraesCS6B02G361600	chr6B:632966867-632968058(-)	RING/U-box superfamily protein, putative	Os02g0767600	AT1G21960
	TraesCS6B02G361700	chr6B:633054625-633057928(-)	Protein COBRA	NA	NA
	TraesCS6B02G361800	chr6B:633532903-633536879(+)	Phosphate carrier protein, mitochondrial	Os02g0767500	AT5G14040
	TraesCS6B02G361900	chr6B:633547666-633550347(+)	Serine/threonine-protein kinase	Os02g0767400	NA
	TraesCS6B02G362000	chr6B:633730596-633732366(+)	Glycosyltransferase	Os02g0755900	AT1G22400
	TraesCS6B02G362100	chr6B:633858539-633859821(+)	Flavonol synthase	Os02g0767300	AT5G08640
	TraesCS6B02G362200	chr6B:633896583-633898132(-)	Superoxide dismutase [Cu-Zn]	NA	NA
	TraesCS6B02G362300	chr6B:633903843-633907796(-)	Cyclin-like protein	Os01g0377500	AT2G26430
	TraesCS6B02G362400	chr6B:633910122-633915630(+)	NA	Os03g0363500	AT5G18840
	TraesCS6B02G362500	chr6B:633915826-633917188(-)	zinc/iron-chelating domain protein	Os03g0363400	NA
	TraesCS6B02G362600	chr6B:633918025-633923526(-)	3-oxoacyl-[acyl-carrier-protein] synthase-like protein	Os03g0363200	AT5G04520
	TraesCS6B02G362700	chr6B:634043817-634046937(+)	NA	Os03g0362200	NA
	TraesCS6B02G362800	chr6B:634046893-634049669(-)	NA	Os03g0360700	AT4G21860
	TraesCS6B02G362900	chr6B:634306279-634309938(+)	Lipase	Os02g0767200	AT1G45201
	TraesCS6B02G363000	chr6B:634321918-634322503(+)	Pathogenesis-related protein PR-4	NA	AT3G04720
	TraesCS6B02G363100	chr6B:634330005-634330533(+)	Pathogenesis-related protein PR-4	NA	AT3G04720
	TraesCS6B02G363200	chr6B:634330858-634335883(-)	THO complex subunit 5	Os02g0767100	AT1G45233
	TraesCS6B02G363300	chr6B:634501638-634502222(+)	Ripening-related protein	NA	NA
	TraesCS6B02G363400	chr6B:634502882-634503969(-)	Signal peptidase I	NA	NA
	TraesCS6B02G363500	chr6B:634568594-634580495(+)	Neuroblastoma-amplified sequence	NA	NA
	TraesCS6B02G363600	chr6B:634611394-634616763(+)	Remorin	Os02g0767000	AT1G45207
	TraesCS6B02G363700	chr6B:634639596-634642685(+)	Mannan endo-1,4-beta-mannosidase 4	Os02g0766900	NA
	TraesCS6B02G363800	chr6B:634939897-634942944(+)	Mannan endo-1,4-beta-mannosidase 4	Os02g0766900	AT5G66460
	TraesCS6B02G363900	chr6B:634976669-634979612(+)	Mannan endo-1,4-beta-mannosidase 4	Os02g0766900	AT5G66460
	TraesCS6B02G364000	chr6B:635168431-635172842(+)	BZIP transcription factor	Os02g0766700	AT1G45249
	TraesCS6B02G364100	chr6B:635175281-635176620(-)	DUF1685 family protein	Os02g0766600	NA
	TraesCS6B02G364200	chr6B:635274725-635281114(-)	Ankyrin repeat family protein	NA	NA
	TraesCS6B02G364300	chr6B:636185525-636187768(+)	ATP-dependent RNA helicase	Os03g0708600	AT1G28180
	TraesCS6B02G364400	chr6B:636211913-636214217(+)	ATP-dependent RNA helicase	Os03g0708600	AT1G28180
	TraesCS6B02G364500	chr6B:636381721-636385272(+)	DNA-directed RNA polymerase subunit	Os02g0766000	AT1G45230
	TraesCS6B02G364600	chr6B:636392631-636397024(+)	Nitrite reductase	Os02g0765900	AT2G15620
qBV6B.2	TraesCS6B02G379600	chr6B:654732653-654735781(-)	Kinase	Os02g0787200	NA
	TraesCS6B02G379700	chr6B:654736001-654740177(-)	Alpha/beta-hydrolase superfamily protein	Os02g0787100	NA
	TraesCS6B02G379800	chr6B:654775115-654775965(+)	Pathogenesis-related protein 1	Os02g0787000	NA
	TraesCS6B02G379900	chr6B:654878858-654879304(+)	Cysteine protease, putative	Os04g0206300	AT5G45890
	TraesCS6B02G380000	chr6B:654917608-654918723(+)	Cysteine protease, putative	Os04g0207600	AT5G45890
	TraesCS6B02G380200	chr6B:655053470-655054583(+)	Cysteine protease, putative	Os04g0207600	AT5G45890
	TraesCS6B02G380300	chr6B:655061588-655064513(+)	Sugar transporter family protein, expressed	Os11g0643800	AT2G48020
	TraesCS6B02G380400	chr6B:655066540-655066827(-)	B3 domain-containing protein family	NA	NA
	TraesCS6B02G380500	chr6B:655250609-655251142(+)	2-oxoglutarate (2OG) and Fe(II)-dependent oxygenase superfamily protein	NA	NA
	TraesCS6B02G380600	chr6B:655275314-655276095(+)	NFX1-type zinc finger-containing protein 1	NA	NA
	TraesCS6B02G380700	chr6B:655278259-655278990(+)	S-locus lectin protein kinase family protein	NA	NA
	TraesCS6B02G380800	chr6B:655862884-655871010(+)	Glutamate receptor	Os02g0787600	NA
	TraesCS6B02G380900	chr6B:655888000-655892270(+)	Glutamate receptor	Os02g0787600	NA
	TraesCS6B02G381000	chr6B:656030166-656033682(-)	Protein FLX-like 1	NA	NA
	TraesCS6B02G381100	chr6B:656165033-656171069(+)	Cycloeucalenol cycloisomerase	NA	AT5G50375
	TraesCS6B02G381200	chr6B:656177304-656178798(-)	Exocyst complex component, putative	NA	NA
	TraesCS6B02G381300	chr6B:656273611-656281007(+)	NA	Os02g0787800	AT4G30340
	TraesCS6B02G381400	chr6B:656280977-656286246(-)	Glutamate receptor	Os02g0787600	NA
	TraesCS6B02G381500	chr6B:656484186-656486770(-)	NA	NA	NA
	TraesCS6B02G381600	chr6B:656509445-656512233(+)	Eukaryotic translation initiation factor 3 subunit G	Os02g0788400	AT3G11400
	TraesCS6B02G381700	chr6B:656512473-656514245(-)	NA	Os02g0788500	NA
	TraesCS6B02G381800	chr6B:656523246-656526665(-)	Chaperone protein clpB	Os02g0788600	NA
	TraesCS6B02G381900	chr6B:656542938-656566115(-)	Amino acid transporter family protein	Os02g0788800	AT2G41190
	TraesCS6B02G382000	chr6B:656996783-657001563(-)	NA	Os02g0788800	AT2G41190
	TraesCS6B02G382100	chr6B:657089245-657091238(+)	Equilibrative nucleoside transporter	Os08g0205200	AT1G70330
	TraesCS6B02G382200	chr6B:657092121-657092279(+)	Arginine--tRNA ligase	NA	NA
	TraesCS6B02G382300	chr6B:657263691-657268451(-)	Cyclic nucleotide-gated channel	Os02g0789100	AT4G30360
	TraesCS6B02G382400	chr6B:657283117-657287053(-)	TVP38/TMEM64 family membrane protein	Os03g0374400	AT2G02370
	TraesCS6B02G382500	chr6B:657619370-657645216(-)	Cyclic nucleotide-gated channel	Os02g0789100	AT4G30360
	TraesCS6B02G382600	chr6B:657650410-657654075(-)	Arginine/serine-rich splicing factor, putative	Os02g0789400	NA
	TraesCS6B02G382700	chr6B:657938200-657942532(+)	Cyclin family protein	Os09g0504400	AT5G48640
	TraesCS6B02G382800	chr6B:657943744-657947679(-)	RING/U-box superfamily protein	NA	NA
	TraesCS6B02G382900	chr6B:657983087-657983599(+)	DNA-directed RNA polymerase subunit beta	NA	NA
	TraesCS6B02G383000	chr6B:658119248-658120175(+)	Late embryogenesis abundant (LEA) hydroxyproline-rich glycoprotein family	NA	NA
	TraesCS6B02G383100	chr6B:658172183-658175200(+)	Protein CYPRO4	Os02g0789600	AT3G19240
	TraesCS6B02G383200	chr6B:658177094-658178907(+)	Dehydrin	NA	NA
	TraesCS6B02G383300	chr6B:658291240-658297903(+)	Protein DETOXIFICATION	Os07g0502200	AT3G23560
	TraesCS6B02G383400	chr6B:658366435-658366983(-)	DNA topoisomerase	NA	NA
	TraesCS6B02G383500	chr6B:658402976-658404180(+)	NA	NA	NA
	TraesCS6B02G383600	chr6B:658530539-658531483(+)	Dehydrin	NA	NA
	TraesCS6B02G383700	chr6B:658550107-658553823(+)	Pectinesterase	Os02g0783000	NA
	TraesCS6B02G383800	chr6B:658577562-658578499(-)	Dehydrin	NA	NA
	TraesCS6B02G383900	chr6B:658581453-658584098(+)	Leucine-rich repeat receptor-like protein kinase family protein	Os10g0375000	NA
	TraesCS6B02G384000	chr6B:658610590-658622188(+)	Protein kinase, putative	Os02g0777400	NA
	TraesCS6B02G384200	chr6B:658663580-658667689(+)	Leucine-rich repeat receptor-like protein kinase family protein	NA	NA
	TraesCS6B02G384300	chr6B:658710337-658714564(+)	Leucine-rich repeat receptor-like protein kinase family protein	NA	NA
	TraesCS6B02G384500	chr6B:659232852-659237118(-)	Trehalose-6-phosphate synthase	Os02g0790500	AT2G18700
	TraesCS6B02G384600	chr6B:659589140-659589541(+)	Stigma-specific protein Stig1	NA	NA
	TraesCS6B02G384700	chr6B:659612324-659617048(+)	Sugar transporter, putative	Os03g0218400	AT5G26340
	TraesCS6B02G384800	chr6B:659624250-659638925(-)	heat-inducible transcription repressor (DUF639)	NA	NA
	TraesCS6B02G384900	chr6B:659639554-659649179(-)	Protein RFT1-like protein	Os07g0486100	AT5G07630
	TraesCS6B02G385000	chr6B:659808857-659810173(+)	Protein pelota homolog	NA	AT4G27650
	TraesCS6B02G385100	chr6B:659934623-659936852(-)	RING finger protein	Os02g0790600	AT4G30400
	TraesCS6B02G385200	chr6B:660218201-660221085(+)	Ankyrin repeat-containing protein, putative	Os02g0791200	AT5G57740
	TraesCS6B02G385300	chr6B:660251962-660252312(-)	arginine N-methyltransferase, putative (DUF688)	NA	NA
	TraesCS6B02G385400	chr6B:660254392-660255159(-)	Kinase, putative	Os02g0777400	AT4G30520
	TraesCS6B02G385500	chr6B:660258402-660260423(+)	Lectin receptor kinase	Os02g0777400	AT4G30520
	TraesCS6B02G385600	chr6B:660267290-660269323(+)	Lectin receptor kinase	Os02g0777400	AT4G30520
	TraesCS6B02G385700	chr6B:660436767-660437315(-)	DNA topoisomerase	NA	NA
	TraesCS6B02G385800	chr6B:660455615-660456503(+)	BHLH transcription factor	Os02g0791300	AT4G30410
	TraesCS6B02G385900	chr6B:660562784-660564508(-)	UDP-glucuronate 4-epimerase 4	Os02g0791500	AT4G30440
	TraesCS6B02G386000	chr6B:660643019-660646455(+)	F-box protein	NA	NA
	TraesCS6B02G386100	chr6B:660664103-660676384(+)	Kinase	Os02g0791700	AT4G30960
	TraesCS6B02G386200	chr6B:660676250-660680341(-)	Autophagy-related protein 18	Os02g0791800	AT4G30510
	TraesCS6B02G386300	chr6B:661052615-661052878(+)	SsrA-binding protein	NA	NA
	TraesCS6B02G386400	chr6B:661338207-661340313(+)	Pheophorbide a oxygenase, chloroplastic	Os02g0792800	AT2G24820
	TraesCS6B02G386500	chr6B:661340337-661343700(-)	Serine incorporator	Os02g0792900	AT1G16180
	TraesCS6B02G386600	chr6B:661463674-661467425(-)	Zinc finger CCCH-type with G patch domain protein	Os02g0793000	NA
	TraesCS6B02G386700	chr6B:661520374-661522332(+)	Cytochrome b-c1 complex subunit 8	Os06g0175900	AT3G10860
	TraesCS6B02G386800	chr6B:661539282-661540506(+)	Structural maintenance of chromosomes protein	NA	NA
	TraesCS6B02G386900	chr6B:661841169-661842443(+)	Mediator of RNA polymerase II transcription subunit 23	NA	NA
	TraesCS6B02G387000	chr6B:661851160-661859891(+)	Isopentenyl-diphosphate delta-isomerase	Os02g0793300	AT1G79690
	TraesCS6B02G387100	chr6B:661862347-661863140(-)	Protease inhibitor/seed storage/lipid transfer protein family protein	NA	AT4G30880
	TraesCS6B02G387200	chr6B:662028638-662032091(-)	Disease resistance protein (NBS-LRR class) family	NA	NA
	TraesCS6B02G387300	chr6B:662090891-662107314(-)	Vacuolar protein-sorting protein 33	Os04g0223000	AT3G54860
	TraesCS6B02G387400	chr6B:662256760-662268336(-)	Clustered mitochondria protein	NA	NA
	TraesCS6B02G387500	chr6B:662451815-662452631(+)	Membrane steroid-binding protein	Os02g0793700	AT2G24940
	TraesCS6B02G387600	chr6B:662500617-662505477(-)	Embryogenesis transmembrane protein-like	NA	NA
	TraesCS6B02G387700	chr6B:662510516-662513582(+)	ATP-dependent DNA helicase	Os02g0793800	AT4G30780
	TraesCS6B02G387800	chr6B:662513699-662517799(-)	Snf1-related kinase interactor 1, putative	Os02g0793900	NA
	TraesCS6B02G387900	chr6B:662560290-662563919(-)	RING/U-box superfamily protein	Os02g0794000	NA
	TraesCS6B02G388000	chr6B:662886039-662893827(+)	QWRF motif protein (DUF566)	Os02g0794300	AT4G30710
	TraesCS6B02G388100	chr6B:662894403-662899450(-)	Translation initiation factor IF-3	Os02g0794400	AT4G30690
	TraesCS6B02G388200	chr6B:663664791-663676654(+)	Myosin heavy chain-like protein, putative	NA	NA
	TraesCS6B02G388300	chr6B:663683530-663684739(+)	Cytosolic Fe-S cluster assembly factor NBP35	NA	NA
	TraesCS6B02G388400	chr6B:663691006-663692885(-)	NA	NA	NA
	TraesCS6B02G388500	chr6B:663800085-663800805(+)	Cytochrome c oxidase copper chaperone	Os02g0794600	AT1G53030
	TraesCS6B02G388600	chr6B:663840537-663846052(-)	Carboxypeptidase	Os02g0794500	AT4G30610
	TraesCS6B02G388700	chr6B:663985164-663987054(+)	Anthocyanin 5-aromatic acyltransferase-like protein	Os07g0414000	NA
	TraesCS6B02G388800	chr6B:664021498-664027063(-)	Disease resistance protein (NBS-LRR class) family	NA	NA
	TraesCS6B02G388900	chr6B:664062456-664064312(-)	NBS-LRR disease resistance protein, putative	NA	NA
	TraesCS6B02G389000	chr6B:664064459-664070409(-)	Disease resistance protein (NBS-LRR class) family	NA	NA
	TraesCS6B02G389100	chr6B:664194466-664198139(+)	Purple acid phosphatase	Os12g0637200	AT2G16430
	TraesCS6B02G389200	chr6B:664216984-664221032(-)	Leucine aminopeptidase, putative	Os02g0794700	AT4G30920
	TraesCS6B02G389300	chr6B:664222179-664232873(-)	Formin-like protein	Os02g0794900	AT3G32400
	TraesCS6B02G389400	chr6B:664256175-664267824(+)	C2 domain-containing protein / GRAM domain-containing protein	Os09g0516900	AT3G59660
	TraesCS6B02G389500	chr6B:664289970-664296128(+)	Ubiquitin carboxyl-terminal hydrolase, putative	Os02g0795000	AT4G30890
	TraesCS6B02G389600	chr6B:664304312-664305152(-)	F-box family protein	NA	NA
	TraesCS6B02G389700	chr6B:664381531-664382969(-)	Replication protein A 32 kDa subunit-like protein	NA	AT2G24490
	TraesCS6B02G389800	chr6B:664392840-664394216(-)	mitogen-activated protein kinase 1	NA	NA
	TraesCS6B02G389900	chr6B:664405646-664406953(-)	F-box family protein	NA	NA
	TraesCS6B02G390000	chr6B:664477679-664480588(+)	carboxyl-terminal peptidase, putative (DUF239)	Os02g0792500	NA
	TraesCS6B02G390100	chr6B:664500180-664501715(+)	NA	Os02g0795200	AT4G31805
	TraesCS6B02G390200	chr6B:664520380-664521961(+)	Protein POLAR LOCALIZATION DURING ASYMMETRIC DIVISION AND REDISTRIBUTION	Os02g0795200	AT4G31805
	TraesCS6B02G390300	chr6B:664522166-664524779(-)	carboxyl-terminal peptidase, putative (DUF239)	Os02g0792500	NA
	TraesCS6B02G390400	chr6B:664686214-664686744(+)	B3 domain-containing protein	NA	NA
	TraesCS6B02G390500	chr6B:664821900-664827018(-)	carboxyl-terminal peptidase (DUF239)	Os02g0792500	NA
	TraesCS6B02G390600	chr6B:664834310-664836633(+)	Photosystem II 10 kDa polypeptide	Os08g0200300	AT1G79040
	TraesCS6B02G390700	chr6B:665035093-665037764(-)	FBD-associated F-box protein	Os02g0793500	NA
	TraesCS6B02G390800	chr6B:665130463-665133221(-)	F-box family protein	Os02g0793500	NA
	TraesCS6B02G390900	chr6B:665160376-665163026(-)	FBD-associated F-box protein	Os02g0793500	NA
	TraesCS6B02G391000	chr6B:665415774-665418450(-)	F-box/RNI-like/FBD-like domains-containing protein	Os02g0793500	NA
	TraesCS6B02G391100	chr6B:665507900-665511646(+)	Basic helix-loop-helix transcription factor	Os02g0795800	AT4G30980
	TraesCS6B02G391200	chr6B:665512071-665516262(-)	ATP-dependent RNA helicase DeaD	Os02g0795900	AT4G15850
	TraesCS6B02G391300	chr6B:665524034-665526675(+)	Pentatricopeptide repeat-containing protein	Os02g0796400	AT4G31850
	TraesCS6B02G391400	chr6B:665715750-665716619(-)	CCR4-NOT transcription complex family protein	Os02g0796300	AT2G32070
	TraesCS6B02G391500	chr6B:665736518-665740464(-)	T-complex protein 1 subunit delta	Os02g0332200	AT3G18190
	TraesCS6B02G391600	chr6B:666275177-666275914(+)	AGAMOUS-like MADS-box protein	NA	NA
	TraesCS6B02G391700	chr6B:666307302-666308039(+)	AGAMOUS-like MADS-box protein	NA	NA
qBV6D	TraesCS6D02G330200	chr6D:433641519-433642274(+)	Flavin-binding monooxygenase family protein	NA	NA
	TraesCS6D02G330300	chr6D:433645630-433646507(+)	Translation initiation factor IF-2	NA	NA
	TraesCS6D02G330400	chr6D:433696030-433696812(-)	NFX1-type zinc finger-containing protein 1	NA	NA
	TraesCS6D02G330500	chr6D:433708698-433715343(-)	Glutamate receptor	Os02g0787600	NA
	TraesCS6D02G330600	chr6D:433765233-433768001(-)	Protein FLX-like 1	Os04g0479100	NA
	TraesCS6D02G330700	chr6D:433897058-433902710(+)	Cycloeucalenol cycloisomerase	NA	AT5G50375
	TraesCS6D02G330800	chr6D:433929693-433936738(+)	Diacylglycerol kinase	Os02g0787800	AT2G18730
	TraesCS6D02G330900	chr6D:433936980-433942791(-)	Glutamate receptor	Os02g0787600	NA
	TraesCS6D02G331000	chr6D:434017477-434020605(+)	Eukaryotic translation initiation factor 3 subunit G	Os02g0788400	AT3G11400
	TraesCS6D02G331100	chr6D:434020787-434022596(-)	F-box protein SKIP8	Os02g0788500	NA
	TraesCS6D02G331200	chr6D:434140386-434143779(-)	Chaperone protein clpB	Os02g0788600	NA
	TraesCS6D02G331300	chr6D:434169366-434173088(-)	Amino acid transporter family protein	Os02g0788800	AT2G41190
	TraesCS6D02G331400	chr6D:434252973-434257762(-)	NA	Os02g0788800	AT2G41190
	TraesCS6D02G331500	chr6D:434402729-434407455(+)	Lysine--tRNA ligase	NA	NA
	TraesCS6D02G331600	chr6D:434440915-434442870(+)	NA	Os08g0205200	AT1G70330
	TraesCS6D02G331700	chr6D:434450430-434454809(-)	Cyclic nucleotide-gated channel	Os02g0789100	AT4G30360
	TraesCS6D02G331800	chr6D:434460014-434464075(-)	TVP38/TMEM64 family membrane protein	Os03g0374400	AT2G02370
	TraesCS6D02G331900	chr6D:434467990-434478494(-)	Cyclic nucleotide-gated channel	Os02g0789100	AT4G30360
	TraesCS6D02G332000	chr6D:434482186-434485928(-)	Arginine/serine-rich splicing factor, putative	Os02g0789400	NA
	TraesCS6D02G332100	chr6D:434507902-434512189(+)	Cyclin family protein	Os09g0504400	AT5G48640
	TraesCS6D02G332200	chr6D:434512436-434516017(-)	RING/U-box superfamily protein	NA	NA
	TraesCS6D02G332300	chr6D:434604263-434605238(+)	Late embryogenesis abundant (LEA) hydroxyproline-rich glycoprotein family	NA	NA
	TraesCS6D02G332400	chr6D:434786695-434789883(+)	Protein CYPRO4	Os02g0789600	AT3G19240
	TraesCS6D02G332500	chr6D:434811674-434812738(+)	Dehydrin	NA	NA
	TraesCS6D02G332600	chr6D:435012400-435012681(+)	Dehydrin	NA	NA
	TraesCS6D02G332700	chr6D:435072895-435075633(+)	Dehydrin	NA	NA
	TraesCS6D02G332800	chr6D:435300309-435308407(+)	Protein DETOXIFICATION	Os07g0502200	AT3G23560
	TraesCS6D02G332900	chr6D:435351033-435352218(+)	NA	NA	NA
	TraesCS6D02G333000	chr6D:435711668-435712623(+)	Dehydrin	NA	NA
	TraesCS6D02G333100	chr6D:435749803-435750719(+)	Dehydrin	NA	NA
	TraesCS6D02G333200	chr6D:435763700-435764598(+)	Dehydrin	NA	NA
	TraesCS6D02G333300	chr6D:435831506-435832386(-)	Dehydrin	NA	NA
	TraesCS6D02G333400	chr6D:435905243-435907228(-)	F-box protein family	NA	NA
	TraesCS6D02G333500	chr6D:435944107-435948027(+)	Pectinesterase	Os02g0783000	NA
	TraesCS6D02G333600	chr6D:435962275-435963310(-)	Dehydrin	NA	NA
	TraesCS6D02G333700	chr6D:435970617-435973895(+)	Receptor-kinase, putative	Os02g0777400	NA
	TraesCS6D02G333800	chr6D:436073808-436077481(+)	Leucine-rich repeat receptor-like protein kinase family protein	NA	NA
	TraesCS6D02G333900	chr6D:436090919-436095234(+)	Leucine-rich repeat receptor-like protein kinase family protein	NA	NA
	TraesCS6D02G334000	chr6D:436221659-436225654(-)	NA	Os02g0790500	AT2G18700
	TraesCS6D02G334100	chr6D:436344553-436344888(+)	Stigma-specific Stig1 family protein	NA	NA
	TraesCS6D02G334200	chr6D:436373616-436374452(+)	Jojoba acyl CoA reductase-related male sterility protein	NA	NA
	TraesCS6D02G334300	chr6D:436421023-436422430(+)	Protein pelota homolog	NA	AT4G27650
	TraesCS6D02G334400	chr6D:436456926-436466320(-)	NA	Os07g0486100	NA
	TraesCS6D02G334500	chr6D:436473875-436474177(-)	Protein pelota homolog	Os04g0659900	AT4G27650
	TraesCS6D02G334600	chr6D:436493931-436496546(+)	NA	NA	NA
	TraesCS6D02G334700	chr6D:436543788-436544897(-)	Serine/threonine protein phosphatase 7 long form isogeny	NA	NA
	TraesCS6D02G334800	chr6D:436638172-436639652(+)	Protein pelota homolog	NA	AT4G27650
	TraesCS6D02G334900	chr6D:436715643-436716974(-)	RING finger protein	Os02g0790600	AT4G30400
	TraesCS6D02G335000	chr6D:436733171-436737059(+)	NA	Os02g0791200	AT5G57740
	TraesCS6D02G335100	chr6D:436757730-436758317(+)	U4/U6.U5 small nuclear ribonucleoprotein 27 kDa protein	NA	NA
	TraesCS6D02G335200	chr6D:436762608-436762952(-)	arginine N-methyltransferase, putative (DUF688)	NA	NA
	TraesCS6D02G335300	chr6D:436764829-436766844(-)	Lectin receptor kinase	Os02g0777400	AT4G30520
	TraesCS6D02G335400	chr6D:436770030-436772078(+)	Lectin receptor kinase	Os02g0777400	AT4G30520
	TraesCS6D02G335500	chr6D:436798615-436799504(+)	BHLH transcription factor	Os02g0791300	AT4G30410
	TraesCS6D02G335600	chr6D:436832068-436834195(+)	UDP-glucuronate 4-epimerase 4	Os02g0791500	AT4G30440
	TraesCS6D02G335700	chr6D:436860476-436863325(+)	F-box protein	NA	NA
	TraesCS6D02G335800	chr6D:436870500-436887069(+)	Kinase	Os02g0791700	AT4G30960
	TraesCS6D02G335900	chr6D:436887329-436890971(-)	Autophagy-related protein 18	Os02g0791800	AT4G30510
	TraesCS6D02G336000	chr6D:437163550-437165751(+)	Pheophorbide a oxygenase, chloroplastic	Os02g0792800	AT2G24820
	TraesCS6D02G336100	chr6D:437165832-437169311(-)	NA	Os02g0792900	AT1G16180
	TraesCS6D02G336200	chr6D:437176213-437180104(-)	Zinc finger CCCH-type with G patch domain protein	Os02g0793000	NA
	TraesCS6D02G336300	chr6D:437197901-437198869(+)	F-box SKIP23-like protein (DUF295)	NA	NA
	TraesCS6D02G336400	chr6D:437281195-437290533(+)	NA	Os02g0793300	AT1G79690
	TraesCS6D02G336500	chr6D:437324480-437341505(-)	Vacuolar protein-sorting protein 33	Os04g0223000	AT3G54860
	TraesCS6D02G336600	chr6D:437402279-437413487(+)	D-lactate dehydrogenase, putative	Os07g0163000	AT5G06580
	TraesCS6D02G336700	chr6D:437426104-437427489(-)	Tetratricopeptide repeat (TPR)-like superfamily protein	NA	NA
	TraesCS6D02G336800	chr6D:437676518-437686848(-)	Clustered mitochondria protein	NA	NA
	TraesCS6D02G336900	chr6D:437772775-437773816(+)	Membrane steroid-binding protein	Os02g0793700	AT2G24940
	TraesCS6D02G337000	chr6D:437781709-437786900(-)	Embryogenesis transmembrane protein-like	Os12g0141000	NA
	TraesCS6D02G337100	chr6D:437803062-437806250(+)	NA	Os02g0793800	AT4G30780
	TraesCS6D02G337200	chr6D:437806754-437810667(-)	Snf1-related kinase interactor 1, putative	Os02g0793900	NA
	TraesCS6D02G337300	chr6D:437814435-437817957(-)	RING/U-box superfamily protein	Os02g0794000	NA
	TraesCS6D02G337400	chr6D:437944539-437951327(+)	QWRF motif protein (DUF566)	Os02g0794300	AT4G30710
	TraesCS6D02G337500	chr6D:437952535-437957312(-)	Translation initiation factor IF-3	Os02g0794400	AT4G30690
	TraesCS6D02G337600	chr6D:437957948-437959948(+)	CsAtPR5	NA	NA
	TraesCS6D02G337700	chr6D:438274335-438286317(+)	Myosin heavy chain-like protein, putative	NA	NA
	TraesCS6D02G337800	chr6D:438298955-438300857(-)	WEB family protein, chloroplastic	NA	NA
	TraesCS6D02G337900	chr6D:438304237-438310273(-)	Protein phosphatase 2C	Os02g0799000	NA
	TraesCS6D02G338000	chr6D:438344877-438345920(+)	Phosphoribosylformylglycinamidine cyclo-ligase	NA	NA
	TraesCS6D02G338100	chr6D:438443404-438444546(-)	Extracellular matrix-binding protein ebh	NA	NA
	TraesCS6D02G338200	chr6D:438456804-438457900(+)	F-box family protein	Os02g0793500	NA
	TraesCS6D02G338300	chr6D:438457948-438458509(+)	F-box/FBD-like domains containing protein	NA	NA
	TraesCS6D02G338400	chr6D:438460817-438461083(+)	Cytochrome c oxidase copper chaperone	Os02g0794600	AT1G53030
	TraesCS6D02G338500	chr6D:438528073-438528827(-)	40S ribosomal protein	Os01g0250600	AT1G57540
	TraesCS6D02G338600	chr6D:438805104-438805334(+)	Cytochrome c oxidase copper chaperone	Os02g0794600	AT1G53030
	TraesCS6D02G338700	chr6D:438805622-438810991(-)	Carboxypeptidase	Os02g0794500	AT4G30610
	TraesCS6D02G338800	chr6D:438829879-438831604(+)	Anthocyanin 5-aromatic acyltransferase-like protein	Os07g0414000	NA
	TraesCS6D02G338900	chr6D:438836102-438839565(-)	Disease resistance protein (NBS-LRR class) family	NA	NA
	TraesCS6D02G339000	chr6D:438861293-438861658(-)	RNA polymerase Rpb7-like, N-terminal domain	NA	NA
	TraesCS6D02G339100	chr6D:438883083-438885643(+)	Purple acid phosphatase	Os12g0637200	AT2G16430
	TraesCS6D02G339200	chr6D:438891058-438895242(-)	Leucine aminopeptidase, putative	Os02g0794700	AT2G24200
	TraesCS6D02G339300	chr6D:438896104-438908215(-)	Formin-like protein	Os02g0794900	AT3G32400
	TraesCS6D02G339400	chr6D:438913083-438924112(+)	C2 domain-containing protein / GRAM domain-containing protein	Os09g0516900	AT3G59660
	TraesCS6D02G339500	chr6D:438929255-438935176(+)	Ubiquitin carboxyl-terminal hydrolase, putative	Os02g0795000	AT4G30890
	TraesCS6D02G339600	chr6D:438942402-438946634(-)	70 kDa heat shock protein	Os02g0815900	AT4G30520
	TraesCS6D02G339700	chr6D:438965041-438967274(-)	70 kDa heat shock protein	NA	AT3G12580
	TraesCS6D02G339800	chr6D:438971020-438974027(+)	NA	NA	NA
	TraesCS6D02G339900	chr6D:439509534-439510826(-)	F-box family protein	NA	NA
	TraesCS6D02G340000	chr6D:439600031-439601068(-)	F-box domain containing protein	NA	NA
	TraesCS6D02G340100	chr6D:439613349-439614359(-)	F-box family protein	NA	NA
	TraesCS6D02G340200	chr6D:439616425-439619143(+)	carboxyl-terminal peptidase, putative (DUF239)	Os02g0792500	NA
	TraesCS6D02G340300	chr6D:439619128-439620879(-)	Protein POLAR LOCALIZATION DURING ASYMMETRIC DIVISION AND REDISTRIBUTION	Os02g0795200	AT4G31805
	TraesCS6D02G340400	chr6D:439655415-439657078(+)	Protein POLAR LOCALIZATION DURING ASYMMETRIC DIVISION AND REDISTRIBUTION	Os02g0795200	AT4G31805
	TraesCS6D02G340500	chr6D:439659401-439662136(-)	carboxyl-terminal peptidase, putative (DUF239)	Os02g0792500	NA
	TraesCS6D02G340600	chr6D:439795718-439798289(-)	carboxyl-terminal peptidase, putative (DUF239)	Os02g0792500	NA
	TraesCS6D02G340700	chr6D:439805570-439808861(+)	Photosystem II 10 kDa polypeptide	Os08g0200300	AT1G79040
	TraesCS6D02G340800	chr6D:439920117-439923036(-)	FBD-associated F-box protein	Os02g0793500	NA
	TraesCS6D02G340900	chr6D:440013443-440015528(-)	FBD-associated F-box protein	Os02g0793500	NA
	TraesCS6D02G341000	chr6D:440208812-440211336(-)	F-box/RNI-like/FBD-like domains-containing protein	Os02g0793500	NA
	TraesCS6D02G341100	chr6D:440219247-440221225(-)	F-box/FBD-like domains containing protein	Os02g0793500	NA
	TraesCS6D02G341200	chr6D:440363517-440367371(+)	Basic helix-loop-helix transcription factor	Os02g0795800	AT4G30980
	TraesCS6D02G341300	chr6D:440367778-440371775(-)	ATP-dependent RNA helicase DeaD	Os02g0795900	AT4G15850
	TraesCS6D02G341400	chr6D:440381263-440384005(+)	Pentatricopeptide repeat-containing protein	Os02g0796400	AT4G31850
	TraesCS6D02G341500	chr6D:440657108-440664394(-)	CCR4-NOT transcription complex family protein	Os02g0796300	AT2G32070
	TraesCS6D02G341600	chr6D:440673614-440675169(+)	Glutamate dehydrogenase	NA	NA
	TraesCS6D02G341700	chr6D:441291375-441292100(+)	AGAMOUS-like MADS-box protein	NA	NA
	TraesCS6D02G341800	chr6D:441316863-441318410(+)	AGAMOUS-like MADS-box protein	NA	NA
	TraesCS6D02G341900	chr6D:441318455-441320111(+)	Cortactin-binding protein 2	NA	NA
	TraesCS6D02G342000	chr6D:441397725-441398450(+)	AGAMOUS-like MADS-box protein	NA	NA
	TraesCS6D02G342100	chr6D:441525814-441526599(+)	MADS-box transcription factor family protein	NA	NA
qBV7B.1	TraesCS7B02G346000	chr7B:602075087-602082417(-)	Mitochondrial intermediate peptidase	Os06g0686500	AT5G51540
	TraesCS7B02G346100	chr7B:602087939-602092341(+)	Transducin/WD40 repeat protein	Os07g0252000	AT2G26060
	TraesCS7B02G346200	chr7B:602093316-602098216(+)	Transducin/WD40 repeat protein	Os07g0252000	AT2G26060
	TraesCS7B02G346300	chr7B:602111303-602112246(-)	weak chloroplast movement under blue light protein (DUF827)	NA	NA
	TraesCS7B02G346400	chr7B:602142869-602143417(+)	GRF zinc finger / Zinc knuckle protein	NA	NA
	TraesCS7B02G346500	chr7B:602302440-602302636(-)	Lipid transfer protein	Os06g0686400	NA
	TraesCS7B02G346600	chr7B:602306060-602310811(-)	Protein SCO1-like protein, mitochondrial	NA	AT3G08950
	TraesCS7B02G346700	chr7B:602937797-602941577(+)	Auxin response factor	Os06g0685700	AT4G30080
	TraesCS7B02G347000	chr7B:603585437-603596838(-)	NA	Os06g0685300	AT1G20080
	TraesCS7B02G347100	chr7B:603657172-603657958(+)	Heat-shock protein, putative	Os01g0184100	AT5G12020
	TraesCS7B02G347200	chr7B:603663599-603664123(+)	CheY-like two-component responsive regulator family protein	NA	NA
	TraesCS7B02G347300	chr7B:603667518-603669794(-)	30S ribosomal protein S6	NA	NA
	TraesCS7B02G347400	chr7B:603746493-603747380(+)	Dynein assembly factor 3, axonemal	NA	NA
	TraesCS7B02G347500	chr7B:603840059-603840346(+)	B3 domain-containing protein family	NA	NA
	TraesCS7B02G347600	chr7B:603944234-603944929(+)	TOPLESS-related 1	NA	NA
	TraesCS7B02G347700	chr7B:603992477-603993390(+)	splicing factor PWI domain-containing protein	NA	NA
	TraesCS7B02G347800	chr7B:603996207-603997056(+)	Translation initiation factor IF-2	NA	NA
	TraesCS7B02G347900	chr7B:604034379-604038770(-)	Ran-binding protein 1 domain-containing	Os05g0349500	NA
	TraesCS7B02G348000	chr7B:604098362-604100902(-)	Serine/threonine-protein kinase	Os04g0420300	NA
	TraesCS7B02G348100	chr7B:604327383-604332236(+)	NA	NA	NA
	TraesCS7B02G348200	chr7B:604767568-604808796(+)	Disease resistance protein RPM1	NA	NA
	TraesCS7B02G348300	chr7B:605111043-605112231(-)	Wound-responsive family protein	Os06g0683700	NA
	TraesCS7B02G348400	chr7B:605396248-605396749(+)	Keratin, type II cytoskeletal 3	NA	NA
	TraesCS7B02G348500	chr7B:605420262-605422383(+)	F-box protein	Os06g0685200	NA
	TraesCS7B02G348600	chr7B:605446088-605451560(+)	External alternative NAD(P)H-ubiquinone oxidoreductase B2, mitochondrial	Os06g0684000	AT4G28220
	TraesCS7B02G348700	chr7B:605643747-605645914(+)	Armadillo/beta-catenin repeat protein-like	Os06g0683950	NA
	TraesCS7B02G348800	chr7B:605648771-605652379(-)	2-oxoglutarate (2OG) and Fe(II)-dependent oxygenase superfamily protein	Os06g0683900	NA
	TraesCS7B02G348900	chr7B:605872269-605872565(+)	Wound-responsive family protein	Os06g0683700	NA
	TraesCS7B02G349000	chr7B:605906743-605909873(+)	Cytochrome P450	Os01g0627500	AT3G14680
	TraesCS7B02G349100	chr7B:605954772-605957651(+)	Cytochrome P450	Os01g0627500	AT3G14680
	TraesCS7B02G349200	chr7B:606136222-606137099(+)	BTB/POZ/MATH-domain protein	NA	NA
	TraesCS7B02G349300	chr7B:606142537-606143124(+)	BTB/POZ/MATH-domain protein	NA	NA
	TraesCS7B02G349400	chr7B:606186087-606186786(+)	BTB-POZ and MATH domain protein	NA	NA
	TraesCS7B02G349500	chr7B:606353537-606356738(+)	NA	NA	NA
	TraesCS7B02G349600	chr7B:606398372-606398923(+)	BTB/POZ domain containing protein, expressed	NA	NA
	TraesCS7B02G349700	chr7B:606556159-606563497(+)	Gibberellin 2-oxidase	Os01g0332200	NA
	TraesCS7B02G349800	chr7B:606644011-606646843(-)	Cytochrome P450	Os01g0627500	AT3G14680
	TraesCS7B02G349900	chr7B:607171727-607173335(+)	Glycosyltransferase	NA	NA
	TraesCS7B02G350000	chr7B:607280579-607282246(+)	Glycosyltransferase	NA	NA
	TraesCS7B02G350200	chr7B:607529611-607530000(-)	Calcium-binding family protein	Os06g0683400	NA
	TraesCS7B02G350300	chr7B:607584657-607589530(-)	Beta-glucosidase, putative	Os06g0683300	AT5G54570
	TraesCS7B02G350400	chr7B:607589807-607592141(+)	50S ribosomal protein L24	Os06g0683200	AT5G54600
	TraesCS7B02G350500	chr7B:607642185-607644052(+)	Dihydroflavonol-4-reductase	Os06g0683100	NA
	TraesCS7B02G350600	chr7B:607909048-607911188(+)	FBD-associated F-box protein	NA	NA
	TraesCS7B02G350700	chr7B:607927593-607938218(+)	F-box family protein	NA	NA
	TraesCS7B02G350800	chr7B:608184181-608184759(+)	F-box domain containing protein, expressed	NA	NA
	TraesCS7B02G351000	chr7B:608191954-608194608(+)	Phosphosulfolactate synthase-related protein	Os06g0682900	AT4G21320
	TraesCS7B02G351100	chr7B:608214842-608220600(+)	NBS-LRR disease resistance protein	Os03g0379700	NA
	TraesCS7B02G351200	chr7B:608300510-608301600(-)	E3 ubiquitin-protein ligase	NA	NA
	TraesCS7B02G351300	chr7B:608364310-608364816(+)	Egg cell-secreted protein 1.1	NA	NA
	TraesCS7B02G351400	chr7B:608375332-608375784(+)	Egg cell-secreted protein 1.1	NA	NA
	TraesCS7B02G351500	chr7B:608380045-608380790(+)	Germin-like protein	Os02g0491700	AT5G38940
	TraesCS7B02G351600	chr7B:608392307-608393057(+)	Germin-like protein	Os02g0491800	AT5G38940
	TraesCS7B02G351700	chr7B:608405328-608406075(+)	Germin-like protein	Os02g0491700	AT5G39190
	TraesCS7B02G351800	chr7B:608415055-608416000(+)	Germin-like protein	Os02g0491700	AT5G38940
	TraesCS7B02G351900	chr7B:608470317-608470656(+)	Protease inhibitor/seed storage/lipid transfer family protein	NA	AT3G53980
	TraesCS7B02G352000	chr7B:608476922-608478255(-)	BTB/POZ domain containing protein	NA	NA
	TraesCS7B02G352100	chr7B:608713908-608719976(+)	Zinc finger CCCH domain protein	Os06g0682800	NA
	TraesCS7B02G352200	chr7B:608721097-608725776(+)	SWAP (Suppressor-of-White-APricot)/surp domain-containing protein	Os06g0682700	NA
	TraesCS7B02G352300	chr7B:608874976-608876587(-)	Xyloglucan 6-xylosyltransferase 1	Os03g0305800	AT3G62720
	TraesCS7B02G352400	chr7B:608900534-608902492(+)	Leucine-rich repeat receptor-like protein kinase family protein	NA	NA
	TraesCS7B02G352500	chr7B:608913471-608916447(-)	Solute carrier family 35 protein	Os06g0681700	AT3G07080
	TraesCS7B02G352600	chr7B:609299239-609299604(-)	Major Facilitator Superfamily protein, expressed	Os10g0370700	NA
	TraesCS7B02G352700	chr7B:609704144-609704536(+)	plastid movement impaired protein	NA	NA
	TraesCS7B02G352800	chr7B:609902557-609910753(+)	NA	Os12g0242900	AT1G67630
qBV7B.2	TraesCS7B02G366600	chr7B:630309718-630311495(+)	Polyubiquitin	Os06g0673500	AT4G05050
	TraesCS7B02G366700	chr7B:630552409-630552871(+)	Polyubiquitin	Os06g0673500	AT5G03240
	TraesCS7B02G366800	chr7B:630589436-630590011(+)	Polyubiquitin	Os06g0673500	AT4G05050
	TraesCS7B02G366900	chr7B:630606805-630607047(-)	DNA-directed RNA polymerase subunit beta''	NA	NA
	TraesCS7B02G367000	chr7B:630651539-630651811(-)	serine-rich adhesin for platelets-like protein	NA	NA
	TraesCS7B02G367100	chr7B:630662177-630662818(-)	Chitinase	NA	NA
	TraesCS7B02G367200	chr7B:630807194-630807763(-)	chromosome-partitioning protein, putative (DUF639)	NA	NA
	TraesCS7B02G367300	chr7B:630903507-630904546(+)	TPX2 (targeting protein for Xklp2) protein family	NA	NA
	TraesCS7B02G367400	chr7B:631404422-631406371(+)	LIGHT-DEPENDENT SHORT HYPOCOTYLS-like protein (DUF640)	Os06g0672400	AT5G58500
	TraesCS7B02G367500	chr7B:632174945-632178931(-)	WD repeat-containing protein 1	Os11g0610700	NA
	TraesCS7B02G367600	chr7B:632268963-632271120(-)	Polyubiquitin protein	Os06g0673500	AT1G23410
	TraesCS7B02G367700	chr7B:632336942-632338732(-)	Polyubiquitin	Os06g0673500	AT3G09790
	TraesCS7B02G367800	chr7B:632493372-632495527(-)	Dolichyl-diphosphooligosaccharide--protein glycosyltransferase subunit DAD1	Os04g0397000	AT1G32210
	TraesCS7B02G367900	chr7B:632651523-632659504(-)	NA	Os04g0397000	AT1G32210
	TraesCS7B02G368000	chr7B:632651494-632655877(+)	Disease resistance protein (TIR-NBS-LRR class) family	NA	NA
	TraesCS7B02G368100	chr7B:632659749-632662049(-)	Phosphatidylinositol transfer protein	Os06g0671800	NA
	TraesCS7B02G368200	chr7B:632663280-632670710(-)	NA	Os06g0671700	AT1G30680
	TraesCS7B02G368300	chr7B:632684656-632685780(+)	poly(A) polymerase 2	NA	NA
	TraesCS7B02G368400	chr7B:632729301-632730767(-)	[F-actin]-methionine sulfoxide oxidase MICAL2	NA	NA
	TraesCS7B02G368500	chr7B:632793597-632795681(-)	Pentatricopeptide repeat-containing protein	Os07g0294600	NA
	TraesCS7B02G368600	chr7B:632799627-632800394(-)	Transcription elongation factor (TFIIS) family protein	NA	NA
	TraesCS7B02G368700	chr7B:632965267-632966754(-)	PP2A regulatory subunit TAP46	NA	NA
	TraesCS7B02G368800	chr7B:633005800-633007881(+)	Pentatricopeptide repeat-containing protein	Os07g0294600	NA
	TraesCS7B02G369000	chr7B:633109624-633110742(-)	Eukaryotic aspartyl protease family protein, expressed	NA	NA
	TraesCS7B02G369100	chr7B:633216753-633218673(-)	Heat shock 70 kDa protein	NA	NA
	TraesCS7B02G369200	chr7B:633251878-633253534(+)	Glycosyltransferase	Os04g0565200	NA
	TraesCS7B02G369400	chr7B:633317179-633319926(-)	Dihydrolipoamide acetyltransferase component of pyruvate dehydrogenase complex	NA	NA
	TraesCS7B02G369500	chr7B:633896576-633897696(+)	Tegument protein BRRF2	NA	NA
	TraesCS7B02G369600	chr7B:634300525-634306356(-)	F-box/LRR protein	NA	NA
	TraesCS7B02G369700	chr7B:634559050-634560216(+)	BTB/POZ domain containing protein, expressed	NA	NA
	TraesCS7B02G369800	chr7B:634567046-634568598(-)	MADS box transcription factor	NA	NA
	TraesCS7B02G369900	chr7B:634579508-634579792(-)	SAUR-like auxin-responsive protein family	Os06g0671150	NA
	TraesCS7B02G370000	chr7B:634833900-634836802(-)	Glutathione S-transferase	Os12g0210200	AT2G02380
	TraesCS7B02G370100	chr7B:635065115-635065534(+)	SAUR-like auxin-responsive protein family	Os06g0671150	NA
	TraesCS7B02G370200	chr7B:635170708-635171127(+)	SAUR-like auxin-responsive protein family	Os06g0671150	NA
	TraesCS7B02G370300	chr7B:635300989-635301951(+)	SAUR-like auxin-responsive protein family	Os06g0671150	NA
	TraesCS7B02G370400	chr7B:635748655-635749074(-)	Auxin responsive protein-like	Os06g0671150	NA
	TraesCS7B02G370500	chr7B:635940595-635941014(-)	Auxin responsive protein-like	Os06g0671150	NA
	TraesCS7B02G370600	chr7B:636432264-636433233(-)	SAUR-like auxin-responsive protein family	Os06g0671150	NA
	TraesCS7B02G370700	chr7B:636507232-636508271(+)	Chitinase	NA	NA
	TraesCS7B02G370800	chr7B:636625080-636627698(-)	30S ribosomal protein S13	Os07g0173501	AT1G22780
	TraesCS7B02G370900	chr7B:636940381-636940671(+)	SAUR-like auxin-responsive protein family	Os06g0671150	NA
	TraesCS7B02G371000	chr7B:636983945-636984232(+)	SAUR-like auxin-responsive protein family	Os06g0671150	NA
	TraesCS7B02G371100	chr7B:637225120-637233491(-)	Potassium transporter	Os06g0671000	AT2G30070
	TraesCS7B02G371200	chr7B:637337842-637339156(+)	Ring finger protein, putative	Os06g0666500	NA
	TraesCS7B02G371300	chr7B:637351112-637364971(+)	Protein kinase family protein	Os06g0663200	NA
	TraesCS7B02G371400	chr7B:637478137-637496216(+)	Protein kinase family protein	Os06g0663200	NA
	TraesCS7B02G371500	chr7B:637568353-637590300(+)	Protein kinase family protein	Os06g0663200	NA
	TraesCS7B02G371600	chr7B:637618064-637622426(-)	F-box protein	NA	NA
	TraesCS7B02G371700	chr7B:637689973-637692778(-)	Chalcone synthase	NA	NA
	TraesCS7B02G371900	chr7B:637768745-637774947(-)	Peptidyl-prolyl cis-trans isomerase-like protein	Os06g0670500	AT1G53720
	TraesCS7B02G372000	chr7B:637821611-637823763(-)	Homeodomain-like superfamily protein	Os06g0670300	NA
	TraesCS7B02G372100	chr7B:637914145-637916317(-)	Homeodomain-like superfamily protein	Os06g0670300	NA
	TraesCS7B02G372200	chr7B:637949076-637951074(-)	Homeodomain-like superfamily protein	Os06g0670300	NA
	TraesCS7B02G372300	chr7B:638066058-638070449(+)	Aspartyl/glutamyl-tRNA(Asn/Gln) amidotransferase subunit B, putative isoform 2	Os06g0670100	NA
	TraesCS7B02G372400	chr7B:638070498-638077269(-)	Molybdenum cofactor sulfurase	Os06g0670000	AT1G16540
	TraesCS7B02G372500	chr7B:638129515-638134455(-)	MYB-related transcription factor	Os06g0669700	NA
	TraesCS7B02G372600	chr7B:638485451-638489190(+)	OTU domain-containing protein	Os06g0669800	AT3G02070
	TraesCS7B02G372700	chr7B:638509565-638515410(+)	Embryo yellow protein	Os06g0669600	AT5G51430
	TraesCS7B02G372800	chr7B:638610203-638610652(-)	Aspartyl/glutamyl-tRNA(Asn/Gln) amidotransferase subunit B	NA	NA
	TraesCS7B02G372900	chr7B:638791153-638794015(-)	F-box protein	NA	NA
	TraesCS7B02G373000	chr7B:638881377-638885540(+)	ATP-dependent zinc metalloprotease FTSH protein	Os06g0669400	AT2G30950
	TraesCS7B02G373100	chr7B:638913551-638923559(+)	Poly(A) polymerase	Os06g0669275	NA

## Sheet: HA
Table S4.4 Annotation genes within the 4 Mb region flanking of the significant SNPs included in stable QTL for HA
QTL	Gene	Location	Description	Oryza sativa	Arabidopsis thaliana
qHA1A.1	TraesCS1A02G068800	chr1A:50511541-50512089(+)	DNA topoisomerase	NA	NA
	TraesCS1A02G068900	chr1A:50538726-50539888(-)	GH3.3	NA	NA
	TraesCS1A02G069000	chr1A:50631574-50631948(-)	bZIP transcription factor family protein	NA	NA
	TraesCS1A02G069100	chr1A:50837517-50841064(-)	CsAtPR5	NA	NA
	TraesCS1A02G069200	chr1A:50842537-50845185(-)	CsAtPR5	NA	NA
	TraesCS1A02G069300	chr1A:51700021-51707185(+)	Phosphoinositide phospholipase C	Os05g0127200	AT3G55940
	TraesCS1A02G069400	chr1A:52056090-52060042(-)	ADP-ribosylation factor, putative	Os07g0620400	AT5G52210
	TraesCS1A02G069500	chr1A:52228530-52232086(+)	LOW protein: M-phase inducer phosphatase-like protein	Os05g0128300	NA
	TraesCS1A02G069600	chr1A:52235911-52238246(-)	Zinc finger CCCH domain-containing protein	Os05g0128200	AT3G55980
	TraesCS1A02G069700	chr1A:52453835-52459566(+)	RRP15-like protein	NA	NA
	TraesCS1A02G069800	chr1A:52471905-52483350(+)	F-box family protein	NA	NA
	TraesCS1A02G069900	chr1A:52519641-52520791(-)	golgin Putative 1	Os05g0128100	NA
	TraesCS1A02G070000	chr1A:52540443-52542008(+)	E3 ubiquitin-protein ligase	NA	NA
	TraesCS1A02G070100	chr1A:52559623-52563522(-)	DNA topoisomerase 2	NA	NA
	TraesCS1A02G070200	chr1A:53022367-53027095(+)	2-oxoglutarate (2OG) and Fe(II)-dependent oxygenase superfamily protein	Os05g0127500	AT3G55970
	TraesCS1A02G070300	chr1A:53032274-53037595(-)	Chaperone protein dnaJ	Os05g0127400	AT3G08910
	TraesCS1A02G070400	chr1A:53187274-53189460(-)	WRKY transcription factor	Os05g0137500	NA
	TraesCS1A02G070500	chr1A:53436194-53438543(+)	Aminotransferase-related family protein	Os11g0552000	AT5G53970
	TraesCS1A02G070600	chr1A:53454198-53457285(-)	Kinase family protein	Os05g0127300	AT3G55950
	TraesCS1A02G070700	chr1A:53471544-53473048(+)	BTB/POZ domain containing protein	NA	NA
	TraesCS1A02G070800	chr1A:53509357-53510453(+)	BTB/POZ domain containing protein	NA	NA
	TraesCS1A02G070900	chr1A:53674142-53677477(+)	NA	NA	NA
	TraesCS1A02G071000	chr1A:53685330-53686430(+)	BTB/POZ domain containing protein	NA	NA
	TraesCS1A02G071100	chr1A:53850045-53859233(+)	Regulator of chromosome condensation (RCC1) family protein	Os04g0662800	AT1G19880
	TraesCS1A02G071200	chr1A:53865089-53869197(+)	Regulator of chromosome condensation (RCC1) family protein	Os04g0662800	AT1G19880
	TraesCS1A02G071300	chr1A:53903909-53912680(-)	ATP-dependent zinc metalloprotease FtsH	NA	NA
	TraesCS1A02G071400	chr1A:53993672-53997512(-)	Glycosyltransferase	Os04g0326201	AT1G22380
	TraesCS1A02G071500	chr1A:54000806-54002679(+)	Mitochondrial pyruvate carrier	Os09g0373000	AT5G20090
	TraesCS1A02G071600	chr1A:54008577-54009363(-)	Saccharopine dehydrogenase	NA	NA
	TraesCS1A02G071700	chr1A:54022014-54027441(-)	Carotenoid isomerase, putative, expressed	Os11g0572700	AT1G06820
	TraesCS1A02G071800	chr1A:54074821-54077829(-)	Metal tolerance protein	Os05g0128400	AT2G46800
	TraesCS1A02G072000	chr1A:54349175-54355250(+)	Glutamate--cysteine ligase, chloroplastic	Os05g0129000	AT4G23100
	TraesCS1A02G072100	chr1A:54458835-54461788(+)	Endoglucanase	Os05g0129200	AT2G44550
	TraesCS1A02G072200	chr1A:54461054-54463277(-)	Aminotransferase like protein	Os05g0129100	AT1G80600
	TraesCS1A02G072300	chr1A:56337275-56339680(+)	Endoglucanase	Os05g0129200	AT2G44550
	TraesCS1A02G072400	chr1A:56592449-56593745(+)	BTB/POZ/MATH-domain protein	NA	NA
	TraesCS1A02G072500	chr1A:56601206-56601499(+)	BTB/POZ domain containing protein, expressed	NA	NA
	TraesCS1A02G072600	chr1A:56617368-56618763(+)	BZIP transcription factor	Os05g0129300	NA
	TraesCS1A02G072700	chr1A:56620439-56627879(-)	Homeobox protein knotted-1-like 1	Os05g0129700	NA
	TraesCS1A02G072800	chr1A:56917864-56924080(+)	Homeobox protein knotted-1-like 1	Os05g0129700	NA
	TraesCS1A02G072900	chr1A:57172831-57173955(-)	BTB/POZ domain containing protein, expressed	NA	NA
	TraesCS1A02G073000	chr1A:57189794-57192224(+)	NA	Os05g0131100	AT4G01995
	TraesCS1A02G073100	chr1A:57192368-57194346(+)	transmembrane protein, putative (DUF247)	Os05g0131000	NA
	TraesCS1A02G073200	chr1A:57204825-57207507(+)	Leucine-rich repeat receptor-like protein kinase family protein	Os10g0375400	AT5G21090
	TraesCS1A02G073300	chr1A:57209812-57212757(-)	Kinase, putative	Os05g0130100	NA
	TraesCS1A02G073400	chr1A:57302734-57307922(-)	RNA polymerase II-associated protein 3	Os05g0129900	NA
	TraesCS1A02G073500	chr1A:57390211-57394799(-)	NA	Os05g0131000	NA
	TraesCS1A02G073600	chr1A:57398473-57399723(-)	Pentatricopeptide repeat-containing protein	Os05g0132000	NA
	TraesCS1A02G073700	chr1A:57403504-57404820(-)	Pentatricopeptide repeat-containing protein	Os05g0132000	NA
	TraesCS1A02G073800	chr1A:57404833-57405834(-)	Pentatricopeptide repeat-containing protein	Os05g0132000	NA
	TraesCS1A02G073900	chr1A:57634278-57635926(+)	Annexin	Os08g0425700	NA
	TraesCS1A02G074000	chr1A:57638569-57639417(-)	Pentatricopeptide repeat-containing protein	Os05g0132000	AT5G65560
	TraesCS1A02G074100	chr1A:57680537-57681868(-)	Protein BIG GRAIN 1-like	NA	NA
	TraesCS1A02G074200	chr1A:57748615-57750280(-)	F-box protein	Os05g0139200	NA
	TraesCS1A02G074300	chr1A:57758179-57759345(-)	F-box protein	Os05g0139200	NA
	TraesCS1A02G074400	chr1A:57763651-57769710(+)	NA	NA	NA
	TraesCS1A02G074800	chr1A:58123311-58125910(+)	Transmembrane protein, putative	Os05g0131900	NA
	TraesCS1A02G074900	chr1A:58167966-58169879(+)	Pentatricopeptide repeat-containing protein	Os05g0132000	AT1G63630
	TraesCS1A02G075000	chr1A:58170681-58178010(-)	Long-Chain Acyl-CoA Synthetase	Os05g0132100	AT2G47240
	TraesCS1A02G075100	chr1A:58199789-58204396(-)	Agenet domain-containing protein	Os05g0132400	NA
	TraesCS1A02G075200	chr1A:58287902-58291029(+)	transmembrane protein	NA	NA
	TraesCS1A02G075300	chr1A:58369546-58370343(-)	FBD-associated F-box protein	NA	NA
	TraesCS1A02G075400	chr1A:58479189-58479986(+)	FBD-associated F-box protein	NA	NA
	TraesCS1A02G075500	chr1A:58481572-58484867(-)	Signal recognition particle 54 kDa protein	NA	NA
qHA1B.1	TraesCS1B02G185600	chr1B:332266565-332269602(+)	Fiber protein Fb34	Os10g0495900	AT3G15480
	TraesCS1B02G185700	chr1B:332585783-332586591(-)	Dof zinc finger protein	NA	NA
	TraesCS1B02G185800	chr1B:332747729-332750678(+)	Sulfite reductase [NADPH] flavoprotein alpha-component	NA	NA
	TraesCS1B02G185900	chr1B:332795666-332796460(-)	Dof zinc finger protein	Os12g0590700	NA
	TraesCS1B02G186000	chr1B:332803182-332804243(-)	Di-glucose binding protein with Kinesin motor domain-containing protein	NA	NA
	TraesCS1B02G186100	chr1B:332805397-332808356(-)	NA	Os10g0497100	AT4G30580
	TraesCS1B02G186200	chr1B:332836878-332844948(-)	NA	Os10g0497000	NA
	TraesCS1B02G186300	chr1B:333321969-333324003(-)	Protochlorophyllide reductase	Os10g0496900	AT5G54190
	TraesCS1B02G186400	chr1B:333489985-333494434(+)	Prolyl 4-hydroxylase alpha subunit, putative	Os10g0497800	AT1G20270
	TraesCS1B02G186500	chr1B:333595520-333597852(+)	LanC-like protein	Os10g0497900	AT1G52920
	TraesCS1B02G186600	chr1B:333601520-333603004(+)	Epoxide hydrolase 2	Os10g0498200	NA
	TraesCS1B02G186700	chr1B:333625576-333628086(+)	Epoxide hydrolase 2	Os10g0498200	NA
	TraesCS1B02G186800	chr1B:334237890-334240604(+)	RP/EB family microtubule-associated protein	Os10g0498900	AT3G47690
	TraesCS1B02G186900	chr1B:334241644-334245064(-)	Major facilitator superfamily transporter	Os07g0208900	AT4G36790
	TraesCS1B02G187000	chr1B:334305257-334311737(-)	Trafficking protein particle complex subunit 13	Os10g0498800	AT2G47960
	TraesCS1B02G187100	chr1B:334312002-334322225(-)	NA	Os10g0498700	AT4G04920
	TraesCS1B02G187200	chr1B:334547237-334549615(+)	CBS domain-containing protein CBSX5	Os10g0499400	NA
	TraesCS1B02G187300	chr1B:334674777-334685163(+)	Receptor-kinase, putative	Os10g0375000	NA
	TraesCS1B02G187400	chr1B:334890418-334896968(+)	Maf-like protein, expressed	Os11g0549655	AT2G25500
	TraesCS1B02G187500	chr1B:335732515-335735139(+)	Protein NEOXANTHIN-DEFICIENT 1	Os10g0499600	AT1G28100
	TraesCS1B02G187600	chr1B:335972502-335975942(+)	RING finger protein	Os10g0500300	AT5G58787
	TraesCS1B02G187700	chr1B:335976022-335976835(-)	N-acetyltransferase	Os10g0500400	AT1G03650
	TraesCS1B02G187800	chr1B:336069448-336077318(+)	30S ribosomal protein S18	Os10g0500500	NA
	TraesCS1B02G187900	chr1B:336202986-336205768(+)	acyl-UDP-N-acetylglucosamine O-acyltransferase	Os10g0500600	NA
	TraesCS1B02G188000	chr1B:336206886-336210694(+)	Monothiol glutaredoxin	Os10g0500700	AT4G04950
	TraesCS1B02G188100	chr1B:336273431-336276227(-)	Pentatricopeptide repeat-containing protein	Os07g0598500	NA
	TraesCS1B02G188200	chr1B:336351163-336353446(+)	Pentatricopeptide repeat-containing protein, putative	Os10g0501200	NA
	TraesCS1B02G188300	chr1B:336646146-336649442(+)	Calcium uniporter protein, mitochondrial	Os10g0501500	NA
	TraesCS1B02G188400	chr1B:336783279-336787386(-)	Short-chain dehydrogenase/reductase family protein	Os11g0432600	NA
	TraesCS1B02G188500	chr1B:338010240-338015608(-)	Laminin subunit alpha-1	Os09g0531100	AT2G21385
	TraesCS1B02G188600	chr1B:338430229-338430516(-)	Lipid transfer protein	Os10g0505700	NA
	TraesCS1B02G188700	chr1B:338882358-338883428(-)	P-loop nucleoside triphosphate hydrolases superfamily protein with CH (Calponin Homology) domain-containing protein	NA	NA
	TraesCS1B02G188800	chr1B:338893800-338894647(+)	Cytochrome c biogenesis FC	BAC19894	ATMG00180
	TraesCS1B02G188900	chr1B:338896402-338897481(+)	URF 2	NA	NA
	TraesCS1B02G189000	chr1B:338929441-338931454(+)	NADH-ubiquinone oxidoreductase chain 4	BAC19875	ATMG00580
	TraesCS1B02G189100	chr1B:338941259-338941930(+)	Photosystem I P700 chlorophyll a apoprotein A1	CAA33996	ATCG00350
	TraesCS1B02G189200	chr1B:338951910-338952629(+)	Cytochrome c biogenesis FC	BAC19894	ATMG00180
	TraesCS1B02G189300	chr1B:339192202-339192558(-)	Bifunctional lycopene cyclase/phytoene synthase	NA	NA
	TraesCS1B02G189400	chr1B:339364373-339364810(-)	Lipid transfer protein	Os10g0505700	NA
	TraesCS1B02G189500	chr1B:339905544-339906875(+)	Phenylalanine--tRNA ligase beta subunit	NA	NA
	TraesCS1B02G189600	chr1B:340367218-340367505(+)	Lipid transfer protein	Os10g0505700	NA
	TraesCS1B02G189700	chr1B:340370466-340375887(-)	Myosin heavy chain-related protein, putative	Os10g0504600	NA
	TraesCS1B02G189800	chr1B:340463564-340465967(+)	Cytochrome b561	Os10g0504200	AT4G25570
	TraesCS1B02G189900	chr1B:340800891-340807277(+)	ATP-dependent RNA helicase	Os10g0503700	AT4G00660
	TraesCS1B02G190000	chr1B:340809803-340813072(+)	Tetraspanin family protein	Os10g0503600	AT1G63260
	TraesCS1B02G190100	chr1B:340985772-340986373(+)	Acetyl-coenzyme A carboxylase carboxyl transferase subunit beta, chloroplastic	NA	NA
	TraesCS1B02G190200	chr1B:340992872-340993984(+)	F-box family protein, putative	NA	NA
	TraesCS1B02G190300	chr1B:341128590-341129711(+)	F-box family protein, putative	NA	NA
	TraesCS1B02G190400	chr1B:341135045-341140792(-)	NA	Os10g0503500	AT4G00570
	TraesCS1B02G190600	chr1B:341378400-341380276(-)	Benzyl alcohol O-benzoyltransferase	Os10g0503300	AT5G17540
	TraesCS1B02G190700	chr1B:341502555-341522217(+)	NA	Os10g0503200	AT3G55630
	TraesCS1B02G190800	chr1B:341523192-341524875(+)	LIM domain containing protein	Os10g0503100	AT1G01780
	TraesCS1B02G190900	chr1B:341746858-341750514(+)	F-box/LRR protein	Os10g0502900	NA
	TraesCS1B02G191000	chr1B:341929459-341931827(+)	Membrane steroid-binding protein	Os10g0502600	AT3G48890
	TraesCS1B02G191100	chr1B:342085768-342088154(+)	NA	Os10g0502500	AT2G24940
	TraesCS1B02G191200	chr1B:342113967-342117919(+)	Glutamyl-tRNA reductase	Os10g0502400	AT1G58290
	TraesCS1B02G191300	chr1B:342122341-342123053(+)	Clavata3/ESR (CLE) gene family member	Os10g0502300	NA
	TraesCS1B02G191400	chr1B:342322496-342324180(+)	Cytochrome P450, putative	Os01g0227800	NA
	TraesCS1B02G191500	chr1B:342331119-342331382(-)	Disease resistance protein (CC-NBS-LRR class) family	Os10g0502100	NA
	TraesCS1B02G191600	chr1B:342643573-342648178(+)	Thylakoid lumenal 17.4 kDa protein, chloroplastic	Os10g0502000	AT5G53490
	TraesCS1B02G191700	chr1B:342648106-342649732(-)	Tetratricopeptide repeat (TPR)-like superfamily protein	Os10g0501900	NA
	TraesCS1B02G191800	chr1B:342972636-342976850(-)	Homeobox protein BEL1-like protein	Os10g0534900	NA
	TraesCS1B02G191900	chr1B:343347802-343349627(-)	Protein XRI1	NA	NA
	TraesCS1B02G192000	chr1B:343659915-343662451(+)	Aluminum activated malate transporter family protein	Os10g0572100	AT4G17970
	TraesCS1B02G192100	chr1B:343658716-343664799(-)	GTPase family protein	Os10g0572000	NA
	TraesCS1B02G192200	chr1B:344000927-344003380(+)	NAC domain-containing protein	Os09g0552900	NA
	TraesCS1B02G192300	chr1B:344043848-344048755(-)	NA	Os10g0571300	AT5G46570
	TraesCS1B02G192400	chr1B:344367312-344372206(+)	Cell division cycle 48-like protein	Os03g0151800	AT5G03340
	TraesCS1B02G192500	chr1B:344374970-344375715(-)	Histone H2B	Os01g0152700	AT3G45980
	TraesCS1B02G192600	chr1B:344838254-344842121(-)	NA	Os10g0533600	AT4G01370
	TraesCS1B02G192700	chr1B:345303083-345325533(-)	Peptidylprolyl isomerase	Os03g0367000	AT3G54010
	TraesCS1B02G192800	chr1B:345408635-345409750(-)	GDP-mannose transporter	Os03g0215000	AT1G76340
	TraesCS1B02G192900	chr1B:345416620-345418056(-)	Glutamyl-tRNA reductase	Os10g0533200	NA
	TraesCS1B02G193000	chr1B:346165075-346168456(+)	Receptor-like kinase	Os10g0533150	AT1G01540
	TraesCS1B02G193100	chr1B:346168692-346169351(+)	Protein PAM68, chloroplastic	Os10g0533100	NA
	TraesCS1B02G193200	chr1B:346168628-346173913(-)	C-terminal binding protein	Os10g0533000	AT1G01510
	TraesCS1B02G193300	chr1B:346402354-346403451(-)	transcription repressor	Os10g0532600	NA
qHA2B.2	TraesCS2B02G135100	chr2B:101486833-101489343(-)	Calcium-dependent lipid-binding (CaLB domain) family protein	Os07g0670300	AT4G15755
	TraesCS2B02G135200	chr2B:101541903-101543048(-)	Calcium-dependent lipid-binding domain-containing protein	Os07g0670200	AT4G15755
	TraesCS2B02G135300	chr2B:101973664-101980712(-)	NA	NA	NA
	TraesCS2B02G135400	chr2B:101974905-101976230(-)	Aspartic proteinase nepenthesin-1	Os07g0658600	NA
	TraesCS2B02G135500	chr2B:102027554-102029873(-)	NA	NA	NA
	TraesCS2B02G135600	chr2B:102125791-102127163(+)	Two-component response regulator	Os07g0685300	NA
	TraesCS2B02G135700	chr2B:102414810-102417068(+)	Pentatricopeptide repeat-containing protein	Os07g0670000	AT4G15720
	TraesCS2B02G135800	chr2B:102417183-102426990(-)	MORC family CW-type zinc finger protein 4	Os07g0669800	AT4G15730
	TraesCS2B02G135900	chr2B:102971930-102978550(+)	Potassium transporter	Os07g0669650	AT3G02050
	TraesCS2B02G136000	chr2B:102980246-102982978(+)	E3 ubiquitin-protein ligase	Os07g0669600	AT5G18540
	TraesCS2B02G136100	chr2B:103195663-103196586(+)	Ethylene-responsive transcription factor	Os07g0669500	AT5G18560
	TraesCS2B02G136200	chr2B:103395257-103397629(+)	Subtilisin-like protease	Os07g0685900	NA
	TraesCS2B02G136400	chr2B:103757165-103757488(-)	bZIP transcription factor family protein	NA	NA
	TraesCS2B02G136500	chr2B:103923860-103925377(+)	Cytochrome P450 family protein, expressed	Os07g0603700	NA
	TraesCS2B02G136600	chr2B:103960587-103962716(+)	Cytochrome P450 family protein, expressed	Os07g0603700	NA
	TraesCS2B02G136700	chr2B:103996676-103998406(+)	AMP deaminase	Os07g0693500	AT2G38280
	TraesCS2B02G136800	chr2B:104005025-104005630(-)	Calcium-dependent lipid-binding domain-containing protein	Os07g0670300	AT4G15755
	TraesCS2B02G136900	chr2B:104008689-104009482(-)	Kinase family protein	NA	NA
	TraesCS2B02G137000	chr2B:104051876-104052481(-)	Calcium-dependent lipid-binding domain-containing protein	Os07g0670300	AT4G15755
	TraesCS2B02G137100	chr2B:104062456-104067162(-)	GTPase obg	Os07g0669250	AT5G18570
	TraesCS2B02G137200	chr2B:104079929-104082571(-)	Subtilisin-like protease	Os07g0685900	NA
	TraesCS2B02G137300	chr2B:104232810-104237615(+)	NA	Os07g0669100	AT5G57655
	TraesCS2B02G137400	chr2B:104238376-104256322(-)	NA	Os07g0669000	NA
	TraesCS2B02G137500	chr2B:104301507-104309496(+)	NA	NA	NA
	TraesCS2B02G137600	chr2B:104572585-104584395(+)	Ankyrin repeat protein-like	NA	NA
	TraesCS2B02G137700	chr2B:104580530-104581647(-)	Zinc finger protein 512B family	NA	NA
	TraesCS2B02G137800	chr2B:104812840-104817287(+)	NA	Os07g0668900	AT5G18610
	TraesCS2B02G137900	chr2B:104817628-104821546(-)	Lipase	Os07g0668700	AT5G18630
	TraesCS2B02G138000	chr2B:104894976-104896290(+)	Zinc finger CCCH domain-containing protein	Os07g0668600	NA
	TraesCS2B02G138100	chr2B:105373275-105374789(+)	Zinc finger CCCH domain-containing protein	Os07g0668600	NA
	TraesCS2B02G138200	chr2B:105411485-105416837(-)	Ubiquitin carboxyl-terminal hydrolase 2	NA	NA
	TraesCS2B02G138300	chr2B:105477582-105478301(+)	Lipid transfer protein	Os07g0244900	NA
	TraesCS2B02G138400	chr2B:105537527-105540881(+)	Receptor kinase	Os07g0538400	AT5G18610
	TraesCS2B02G138500	chr2B:105688178-105689954(+)	GDSL esterase/lipase	Os07g0668300	AT2G23540
	TraesCS2B02G138600	chr2B:105691242-105697000(+)	Adenylyl cyclase	Os07g0668200	AT4G15640
	TraesCS2B02G138700	chr2B:105873407-105876059(+)	XH/XS domain-containing family protein	NA	NA
	TraesCS2B02G138800	chr2B:105895406-105897010(+)	Cytochrome P450 family protein	Os07g0603700	NA
	TraesCS2B02G138900	chr2B:105906255-105908688(+)	Protein GAMETE EXPRESSED 1	Os07g0668100	NA
	TraesCS2B02G139000	chr2B:105908750-105914005(-)	Kinase family protein	Os07g0668000	AT3G05050
	TraesCS2B02G139100	chr2B:105991484-105995249(-)	Nucleolar protein	Os07g0661800	AT3G05060
	TraesCS2B02G139300	chr2B:106147969-106149355(-)	Pectinesterase	Os07g0655600	NA
	TraesCS2B02G139400	chr2B:106152557-106153672(-)	Pectinesterase	Os07g0655600	NA
	TraesCS2B02G139500	chr2B:106158524-106159662(-)	Pectinesterase	Os07g0655600	NA
	TraesCS2B02G139600	chr2B:106161663-106162770(-)	Pectinesterase	Os07g0655600	NA
	TraesCS2B02G139700	chr2B:106205173-106206063(-)	F-box protein	NA	NA
	TraesCS2B02G139800	chr2B:106451938-106454472(-)	Embryogenesis transmembrane protein-like	NA	NA
	TraesCS2B02G139900	chr2B:106469248-106470354(+)	Pectinesterase	Os07g0655600	NA
	TraesCS2B02G140000	chr2B:106619467-106620928(+)	Pectinesterase	Os07g0655600	NA
	TraesCS2B02G140100	chr2B:106717822-106719178(+)	Pectinesterase	Os07g0655600	NA
	TraesCS2B02G140200	chr2B:106937944-106939727(+)	S-adenosylmethionine-dependent methyltransferase, putative	Os07g0667400	AT3G05100
	TraesCS2B02G140300	chr2B:106954443-106956656(+)	CONSTANS-like zinc finger protein	Os07g0667300	NA
	TraesCS2B02G140400	chr2B:106960544-106962748(-)	Formamidopyrimidine-DNA glycosylase	NA	NA
	TraesCS2B02G140500	chr2B:107023318-107039184(-)	GDSL-like Lipase/Acylhydrolase superfamily protein	NA	NA
	TraesCS2B02G140600	chr2B:107114763-107118529(-)	tRNA-specific 2-thiouridylase MnmA	NA	NA
	TraesCS2B02G140700	chr2B:107379464-107380509(-)	Dynein assembly factor with WDR repeat domains 1	NA	NA
	TraesCS2B02G140800	chr2B:107380874-107382364(-)	transmembrane protein, putative (DUF594)	NA	NA
	TraesCS2B02G140900	chr2B:107531677-107534369(+)	6-methylsalicylic acid synthase	NA	NA
	TraesCS2B02G141000	chr2B:107568498-107575055(+)	Inner membrane ABC transporter permease protein YtfT	NA	NA
	TraesCS2B02G141100	chr2B:107576839-107579334(+)	ATPase E1-E2 type family protein / haloacid dehalogenase-like hydrolase family protein	NA	NA
	TraesCS2B02G141200	chr2B:107783100-107785694(+)	Mediator of DNA damage checkpoint protein 1	NA	NA
	TraesCS2B02G141300	chr2B:107789128-107791936(+)	ARID/bright DNA-binding domain protein	NA	NA
	TraesCS2B02G141400	chr2B:107793256-107796093(+)	translation initiation factor 3 subunit I	NA	NA
	TraesCS2B02G141500	chr2B:107904310-107906122(+)	transmembrane protein, putative (DUF247)	Os07g0672300	NA
	TraesCS2B02G141600	chr2B:107963253-107964346(+)	Basic helix-loop-helix transcription factor	NA	AT3G06120
	TraesCS2B02G141700	chr2B:108229860-108231756(+)	Beta-amylase	Os07g0667100	NA
	TraesCS2B02G141800	chr2B:108231966-108235902(-)	Tubby-like F-box protein	Os07g0667000	AT2G47900
	TraesCS2B02G141900	chr2B:108237682-108242312(-)	Sodium/hydrogen exchanger	Os07g0666900	AT3G05030
	TraesCS2B02G142000	chr2B:108795498-108797770(+)	Kinase interacting (KIP1-like) family protein	Os07g0666600	NA
	TraesCS2B02G142100	chr2B:108996951-109000649(-)	F-box family protein	NA	NA
	TraesCS2B02G142200	chr2B:109084989-109092675(-)	F-box family protein	Os07g0547100	NA
	TraesCS2B02G142300	chr2B:109162176-109162791(+)	Glycoprotein hormones alpha chain	NA	NA
	TraesCS2B02G142400	chr2B:109180671-109184323(-)	F-box family protein	Os07g0547100	NA
	TraesCS2B02G142500	chr2B:109194110-109204305(-)	F-box family protein	Os07g0547100	NA
	TraesCS2B02G142600	chr2B:109209278-109210221(-)	Salt-induced protein	NA	NA
qHA2D.1	TraesCS2D02G071200	chr2D:30230012-30231323(-)	Two-component response regulator	NA	NA
	TraesCS2D02G071300	chr2D:30237655-30238907(-)	response regulator 1	NA	NA
	TraesCS2D02G071400	chr2D:30247335-30250640(-)	Thylakoid lumenal 15.0 kDa protein 2, chloroplastic	Os07g0534000	AT5G52970
	TraesCS2D02G071500	chr2D:30251060-30263373(-)	Vacuolar protein sorting-associated protein 54, chloroplastic	NA	AT4G19490
	TraesCS2D02G071600	chr2D:30327196-30328809(-)	Cytochrome P450, putative	Os05g0211100	AT1G11680
	TraesCS2D02G071700	chr2D:30334308-30335642(+)	3'-N-debenzoyl-2'-deoxytaxol N-benzoyltransferase	NA	NA
	TraesCS2D02G071800	chr2D:30335673-30341769(-)	DNA/RNA helicase protein	NA	NA
	TraesCS2D02G071900	chr2D:30357356-30358045(-)	CMP-N-acetylneuraminate-beta-galactosamide-alpha-2,3-sialyltransferase 1	NA	NA
	TraesCS2D02G072100	chr2D:30400705-30401382(-)	ATP phosphoribosyltransferase regulatory subunit	NA	NA
	TraesCS2D02G072200	chr2D:30404995-30409876(-)	GDT1-like protein	Os11g0544500	AT4G13590
	TraesCS2D02G072300	chr2D:30422254-30423319(+)	calpain-type cysteine protease family	NA	NA
	TraesCS2D02G072400	chr2D:30436813-30437474(+)	transmembrane protein, putative (DUF1218)	NA	NA
	TraesCS2D02G072500	chr2D:30446487-30449693(-)	Leucine-rich repeat receptor-like protein kinase family protein	NA	NA
	TraesCS2D02G072600	chr2D:30456104-30458276(+)	Glycosyltransferase	Os04g0206700	NA
	TraesCS2D02G072700	chr2D:30467520-30471160(-)	F-box/RNI-like superfamily protein	NA	NA
	TraesCS2D02G072800	chr2D:30482975-30489985(-)	5'-3' exoribonuclease 3	Os01g0872700	AT1G75660
	TraesCS2D02G072900	chr2D:30547243-30551684(+)	Ubiquitin thioesterase	NA	NA
	TraesCS2D02G073000	chr2D:30584178-30589184(+)	NA	NA	NA
	TraesCS2D02G073100	chr2D:30655937-30659683(+)	Ubiquitin thioesterase	NA	NA
	TraesCS2D02G073200	chr2D:30660706-30662141(-)	CASP-like protein	NA	NA
	TraesCS2D02G073300	chr2D:30673412-30675022(-)	F-box family protein	NA	NA
	TraesCS2D02G073400	chr2D:30745694-30749892(+)	Acetyltransferase component of pyruvate dehydrogenase complex	Os01g0314100	AT3G06850
	TraesCS2D02G073500	chr2D:30787486-30789242(+)	High affinity nitrate transporter	Os02g0112600	AT5G60770
	TraesCS2D02G073600	chr2D:30934939-30935565(-)	Germin-like protein	Os08g0460000	AT5G20630
	TraesCS2D02G073700	chr2D:30978618-30980064(-)	Germin-like protein	Os08g0460000	AT5G20630
	TraesCS2D02G073800	chr2D:31511685-31513149(+)	F-box family protein	NA	NA
	TraesCS2D02G073900	chr2D:31513300-31517302(-)	1-deoxy-D-xylulose-5-phosphate synthase, Transketolase	Os04g0266900	AT2G45290
	TraesCS2D02G074000	chr2D:31559957-31561490(-)	Acyl-[acyl-carrier-protein] desaturase	Os08g0200100	AT3G02610
	TraesCS2D02G074100	chr2D:31606777-31608496(-)	Acyl-[acyl-carrier-protein] desaturase	Os08g0200100	NA
	TraesCS2D02G074200	chr2D:31728322-31729997(-)	Acyl-[acyl-carrier-protein] desaturase	Os08g0200100	NA
	TraesCS2D02G074300	chr2D:31805895-31811622(-)	Methyl-CpG-binding domain protein	Os04g0266400	NA
	TraesCS2D02G074400	chr2D:31886408-31889787(-)	IAA-amino acid hydrolase ILR1	Os07g0249800	AT3G02875
	TraesCS2D02G074500	chr2D:31896135-31898699(+)	carboxyl-terminal peptidase, putative (DUF239)	NA	NA
	TraesCS2D02G074600	chr2D:31909302-31910855(+)	F-box family protein	NA	NA
	TraesCS2D02G074700	chr2D:31947967-31951030(-)	IAA-amino acid hydrolase ILR1	Os07g0249700	AT3G02875
	TraesCS2D02G074800	chr2D:32028134-32031481(-)	IAA-amino acid hydrolase ILR1	Os07g0249800	AT3G02875
	TraesCS2D02G074900	chr2D:32035506-32036473(+)	Unknown protein	NA	NA
	TraesCS2D02G075000	chr2D:32051640-32056056(-)	Amine oxidase	Os04g0269600	AT4G12280
	TraesCS2D02G075100	chr2D:32070835-32071707(-)	Unknown protein	NA	NA
	TraesCS2D02G075200	chr2D:32150745-32152171(-)	L-lactate dehydrogenase	Os02g0105400	AT4G17260
	TraesCS2D02G075300	chr2D:32181566-32190427(+)	Elongation factor 1 alpha	Os04g0270100	AT1G18070
	TraesCS2D02G075400	chr2D:32280239-32284156(+)	FBD-associated F-box protein	NA	NA
	TraesCS2D02G075500	chr2D:32293803-32297066(-)	ER membrane protein complex subunit 8/9-like protein	Os04g0270200	AT5G55940
	TraesCS2D02G075600	chr2D:32400745-32402175(+)	Glycosyltransferase	Os04g0270900	NA
	TraesCS2D02G075700	chr2D:32469837-32472051(+)	transmembrane protein, putative (DUF594)	NA	NA
	TraesCS2D02G075800	chr2D:32472578-32481962(-)	NAD-dependent protein deacetylase	Os04g0271000	AT5G55760
	TraesCS2D02G075900	chr2D:32502946-32503527(-)	Glycine-rich cell wall structural protein 2	NA	NA
	TraesCS2D02G076000	chr2D:32520264-32521551(-)	Strictosidine synthase	Os08g0175000	NA
	TraesCS2D02G076100	chr2D:32540817-32549164(-)	Pectin lyase-like superfamily protein	NA	NA
	TraesCS2D02G076200	chr2D:32557965-32559316(+)	Strictosidine synthase	Os08g0175000	NA
	TraesCS2D02G076300	chr2D:32594073-32595754(-)	Strictosidine synthase	Os08g0175000	NA
	TraesCS2D02G076400	chr2D:32598127-32599584(+)	Strictosidine synthase	Os08g0175000	NA
	TraesCS2D02G076500	chr2D:32638462-32640696(-)	Proline-rich protein	NA	NA
	TraesCS2D02G076600	chr2D:32763082-32764314(+)	Dof zinc finger protein	Os12g0590700	NA
	TraesCS2D02G076700	chr2D:32788510-32793546(+)	Kinase family protein	Os07g0686800	NA
	TraesCS2D02G076800	chr2D:32793551-32796846(+)	NA	Os07g0695700	NA
	TraesCS2D02G076900	chr2D:32798475-32803889(+)	2-oxoglutarate dehydrogenase E1 component family protein	Os07g0695800	AT3G55410
	TraesCS2D02G077000	chr2D:32806849-32809353(+)	Telomere repeat-binding factor like-protein	Os07g0695900	NA
	TraesCS2D02G077100	chr2D:32960637-32963863(+)	P53/DNA damage-regulated protein	Os07g0485600	AT3G15351
	TraesCS2D02G077200	chr2D:32966897-32972449(+)	methyl-coenzyme M reductase II subunit gamma, putative (DUF3741)	NA	NA
	TraesCS2D02G077300	chr2D:32983668-32986858(-)	LPS-induced tumor necrosis factor alpha factor	Os02g0515600	NA
	TraesCS2D02G077400	chr2D:32991798-32992801(-)	Actin cross-linking protein, putative (DUF569)	NA	NA
	TraesCS2D02G077500	chr2D:33046494-33049609(-)	actin cross-linking protein, putative (DUF569)	NA	NA
	TraesCS2D02G077600	chr2D:33163197-33165243(-)	Actin cross-linking protein, putative (DUF569)	NA	NA
	TraesCS2D02G077700	chr2D:33216511-33231389(+)	DNAJ heat shock N-terminal domain-containing protein-like	NA	NA
	TraesCS2D02G077800	chr2D:33239366-33242006(-)	Actin cross-linking protein, putative (DUF569)	NA	NA
	TraesCS2D02G077900	chr2D:33301130-33310903(+)	DnaJ domain containing protein, expressed	NA	NA
	TraesCS2D02G078000	chr2D:33365170-33367595(+)	DnaJ domain containing protein, expressed	NA	NA
	TraesCS2D02G078100	chr2D:33371930-33374226(-)	Actin cross-linking protein, putative (DUF569)	NA	NA
	TraesCS2D02G078200	chr2D:33543700-33545996(+)	F-box family protein	NA	NA
	TraesCS2D02G078300	chr2D:33580027-33581027(-)	Actin cross-linking protein, putative (DUF569)	NA	NA
	TraesCS2D02G078500	chr2D:33718541-33723620(+)	Kinase interacting (KIP1-like) family protein	Os07g0695400	NA
	TraesCS2D02G078600	chr2D:33726905-33727935(+)	Expansin protein	Os02g0658600	NA
	TraesCS2D02G078700	chr2D:33778826-33780373(-)	UDP-glycosyltransferase	Os07g0672700	NA
	TraesCS2D02G078800	chr2D:33849206-33850590(-)	Expansin protein	Os04g0552000	AT1G65681
	TraesCS2D02G078900	chr2D:33874346-33875361(-)	Expansin protein	Os02g0658600	AT2G45110
	TraesCS2D02G079000	chr2D:33878259-33878715(+)	Ribosome production factor 2-like protein	Os01g0513800	NA
	TraesCS2D02G079100	chr2D:33891999-33894677(+)	Transcription factor protein	NA	NA
	TraesCS2D02G079200	chr2D:33903808-33907017(-)	Protein kinase-like protein	Os07g0695300	AT5G02800
	TraesCS2D02G079300	chr2D:33934810-33935341(+)	NAD(P)H-quinone oxidoreductase subunit 6, chloroplastic	CAA33908	ATCG01080
	TraesCS2D02G079400	chr2D:33935554-33935859(+)	NADH-quinone oxidoreductase subunit K	CAA33955	ATCG01070
	TraesCS2D02G079500	chr2D:33947469-33948577(+)	RING/U-box superfamily protein	NA	NA
	TraesCS2D02G079600	chr2D:33952048-33956269(-)	NA	Os07g0695100	NA
	TraesCS2D02G079800	chr2D:34023057-34025113(+)	Telomerase activating protein Est1	NA	NA
	TraesCS2D02G080000	chr2D:34227832-34231931(+)	Ascorbate peroxidase	Os07g0694700	AT1G07890
	TraesCS2D02G080100	chr2D:34232083-34234923(+)	Arogenate dehydratase	Os07g0694600	AT3G07630
	TraesCS2D02G080200	chr2D:34262673-34263324(-)	Tapetum determinant 1	NA	NA
	TraesCS2D02G080300	chr2D:34272506-34275681(-)	NA	Os05g0588200	AT1G12790
	TraesCS2D02G080400	chr2D:34329547-34332204(+)	Glycosyltransferases	Os07g0694400	NA
	TraesCS2D02G080500	chr2D:34341730-34343945(-)	Glycosyltransferases	Os07g0694400	NA
	TraesCS2D02G080600	chr2D:34377552-34377819(-)	Myb/SANT-like DNA-binding domain protein	NA	NA
	TraesCS2D02G080700	chr2D:34581538-34583498(+)	F-box family protein	NA	NA
	TraesCS2D02G080800	chr2D:34891820-34895411(+)	Elongation factor 1-alpha	Os03g0177400	AT5G60390
	TraesCS2D02G080900	chr2D:34980602-34984168(+)	Elongation factor 1-alpha	Os03g0178000	AT1G07920
	TraesCS2D02G081000	chr2D:34988005-34992393(-)	Yellow stripe-like transporter 12	Os04g0390500	AT3G27020
	TraesCS2D02G081100	chr2D:34988120-34988311(+)	Carbon storage regulator homolog	NA	NA
	TraesCS2D02G081200	chr2D:34994756-34998921(-)	NA	Os04g0390500	AT3G27020
	TraesCS2D02G081300	chr2D:34994875-34995066(+)	50S ribosomal protein L33	NA	NA
	TraesCS2D02G081400	chr2D:34999904-35003326(-)	MLO-like protein	NA	NA
	TraesCS2D02G081500	chr2D:35022527-35025791(-)	NA	NA	AT4G02600
	TraesCS2D02G081600	chr2D:35033280-35034896(-)	F-box domain containing protein, expressed	NA	NA
	TraesCS2D02G081700	chr2D:35081075-35081607(-)	Phosphoglycerate kinase	NA	NA
	TraesCS2D02G081800	chr2D:35229389-35231206(-)	F-box family protein	NA	NA
	TraesCS2D02G081900	chr2D:35240707-35242242(-)	Peroxidase	Os07g0694300	AT2G37130
	TraesCS2D02G082000	chr2D:35259471-35263395(+)	Phosphoinositide phospholipase C	Os07g0694000	AT3G08510
	TraesCS2D02G082100	chr2D:35315022-35316430(+)	Peroxidase	Os07g0694300	AT2G37130
	TraesCS2D02G082200	chr2D:35503151-35513317(-)	NA	Os07g0693900	NA
	TraesCS2D02G082300	chr2D:35531771-35532770(+)	D-ribose-binding periplasmic	NA	NA
	TraesCS2D02G082400	chr2D:35564298-35565379(+)	D-ribose-binding periplasmic	NA	NA
	TraesCS2D02G082500	chr2D:35638995-35640065(+)	D-ribose-binding periplasmic	NA	NA
	TraesCS2D02G082600	chr2D:35677724-35678711(+)	D-ribose-binding periplasmic	NA	NA
	TraesCS2D02G082700	chr2D:35683381-35686524(-)	Omega-3 fatty acid desaturase	Os07g0693800	AT5G05580
	TraesCS2D02G082800	chr2D:35778611-35785069(+)	Chaperone protein dnaJ	NA	NA
	TraesCS2D02G082900	chr2D:35791185-35801312(-)	Syntaxin-binding protein 5-like protein	Os07g0693700	NA
	TraesCS2D02G083000	chr2D:35803955-35806291(+)	RING/FYVE/PHD zinc finger protein	NA	NA
	TraesCS2D02G083100	chr2D:35920429-35924410(+)	transcription coactivator	Os07g0690800	NA
	TraesCS2D02G083200	chr2D:35927661-35928770(+)	Transducin/WD40 repeat-like superfamily protein	Os07g0690600	NA
	TraesCS2D02G083300	chr2D:36052266-36053370(+)	Pleckstrin homology domain-containing family A member 8	Os07g0690600	NA
	TraesCS2D02G083400	chr2D:36090969-36092054(-)	Non-homologous end joining protein Ku 2	NA	NA
	TraesCS2D02G083500	chr2D:36095132-36096238(-)	Transducin/WD40 repeat-like superfamily protein	Os07g0690600	NA
	TraesCS2D02G083600	chr2D:36112676-36114025(+)	Dirigent protein	Os12g0198700	NA
	TraesCS2D02G083700	chr2D:36201682-36202720(+)	NAC domain protein,	Os07g0684800	NA
	TraesCS2D02G083800	chr2D:36269899-36270261(-)	Pectin lyase-like superfamily protein	NA	NA
	TraesCS2D02G083900	chr2D:36279340-36284266(+)	26S protease regulatory subunit	Os07g0691800	AT5G58290
	TraesCS2D02G084000	chr2D:36431876-36435382(-)	transmembrane protein, putative (DUF594)	NA	NA
	TraesCS2D02G084100	chr2D:36488875-36489497(-)	Mitochondrial import inner membrane translocase subunit Tim17	NA	NA
	TraesCS2D02G084200	chr2D:36534151-36537837(+)	Trichome birefringence-like protein	Os07g0693600	AT2G40150
	TraesCS2D02G084300	chr2D:36538467-36544668(-)	AMP deaminase	Os07g0693500	AT2G38280
	TraesCS2D02G084400	chr2D:36576473-36578292(+)	Protein phosphatase 2C-like protein	Os07g0690400	AT2G40180
	TraesCS2D02G084500	chr2D:36583003-36584578(-)	Protein transport sec20	Os02g0658900	NA
	TraesCS2D02G084600	chr2D:36657312-36661415(+)	NBS-LRR-like resistance protein	NA	NA
	TraesCS2D02G084700	chr2D:36666231-36671235(-)	NBS-LRR-like resistance protein	NA	NA
	TraesCS2D02G084800	chr2D:36751113-36751846(+)	BTB/POZ/MATH-domain protein	NA	NA
	TraesCS2D02G084900	chr2D:36771092-36771628(+)	BTB/POZ/MATH-domain protein	NA	NA
	TraesCS2D02G085000	chr2D:36783421-36784278(+)	BTB-POZ and MATH domain protein	NA	NA
	TraesCS2D02G085100	chr2D:36789337-36800416(-)	Importin, putative	Os07g0693400	AT3G08960
	TraesCS2D02G085200	chr2D:36877205-36878310(-)	Extracellular matrix-binding protein ebh	NA	NA
	TraesCS2D02G085300	chr2D:36885908-36888217(+)	Actin cytoskeleton-regulatory complex protein pan1	NA	NA
	TraesCS2D02G085400	chr2D:36910837-36913340(+)	NADH-quinone oxidoreductase subunit A	NA	NA
	TraesCS2D02G085500	chr2D:37020758-37028300(-)	Isoflavone reductase-like protein	Os12g0265100	AT1G32100
	TraesCS2D02G085700	chr2D:37040827-37041165(-)	Isoflavone reductase-like protein	Os12g0263200	AT1G32100
	TraesCS2D02G085800	chr2D:37043491-37046974(-)	Isoflavone reductase-like protein	Os12g0265100	AT1G32100
	TraesCS2D02G086000	chr2D:37053759-37055912(-)	Pyruvate decarboxylase	Os07g0693100	AT4G33070
	TraesCS2D02G086100	chr2D:37072373-37074563(-)	Pyruvate decarboxylase	Os07g0693100	AT4G33070
	TraesCS2D02G086200	chr2D:37141014-37142432(+)	F-box protein family-like	NA	NA
	TraesCS2D02G086300	chr2D:37207983-37210281(+)	Pyruvate decarboxylase	Os07g0693100	AT4G33070
	TraesCS2D02G086400	chr2D:37224320-37225321(-)	Sulfotransferase	NA	NA
	TraesCS2D02G086500	chr2D:37245200-37246549(+)	Sulfotransferase	NA	NA
	TraesCS2D02G086600	chr2D:37251061-37254020(-)	Protein kinase family protein, putative, expressed	Os07g0693000	AT2G40270
	TraesCS2D02G086700	chr2D:37255635-37261006(-)	NA	Os07g0692900	AT2G30110
	TraesCS2D02G086800	chr2D:37312885-37314577(-)	Xyloglucan endotransglucosylase/hydrolase	NA	NA
	TraesCS2D02G086900	chr2D:37367365-37368590(+)	F-box protein	NA	NA
	TraesCS2D02G087000	chr2D:37465486-37469160(+)	TPX2 (Targeting protein for Xklp2) family protein	NA	NA
	TraesCS2D02G087100	chr2D:37490490-37490699(+)	zinc finger (C2H2 type) family protein	NA	NA
	TraesCS2D02G087200	chr2D:37532426-37532521(-)	Cytochrome b6-f complex subunit 6	CAA33966	ATCG00590
	TraesCS2D02G087300	chr2D:37533362-37537847(+)	Eukaryotic translation initiation factor 2 subunit alpha	Os07g0692800	AT2G40290
	TraesCS2D02G087400	chr2D:37608958-37613873(+)	Heat shock transcription factor	Os07g0178600	NA
	TraesCS2D02G087500	chr2D:37645202-37646542(-)	Abscisic acid receptor	Os03g0297600	AT2G40330
	TraesCS2D02G087600	chr2D:37767205-37772192(-)	SNF2 domain-containing protein / helicase domain-containing protein	Os07g0692600	NA
	TraesCS2D02G087700	chr2D:37827829-37829969(-)	Methyltransferase	Os07g0692401	NA
	TraesCS2D02G087800	chr2D:37869923-37871151(+)	CASP-like protein	Os07g0692200	NA
	TraesCS2D02G087900	chr2D:38064967-38069028(+)	26S protease regulatory subunit	Os07g0691800	AT4G29040
	TraesCS2D02G088000	chr2D:38091428-38095776(+)	Receptor-like protein kinase	Os07g0695300	NA
	TraesCS2D02G088100	chr2D:38183865-38184681(-)	Zinc-finger protein	Os11g0340477	NA
	TraesCS2D02G088200	chr2D:38200689-38210167(-)	SCAR family protein	Os07g0691700	NA
	TraesCS2D02G088300	chr2D:38216660-38217592(-)	Lectin receptor kinase	Os07g0686800	AT2G37710
qHA3D.2	TraesCS3D02G463500	chr3D:567662527-567664450(-)	F-box family protein	NA	NA
	TraesCS3D02G463600	chr3D:567741512-567746320(-)	Wall-associated receptor kinase 2	Os08g0501088	NA
	TraesCS3D02G463700	chr3D:567842363-567855332(+)	Salicylate O-methyltransferase	NA	NA
	TraesCS3D02G463800	chr3D:567855334-567867966(-)	Leucine-rich repeat receptor-like protein kinase family protein	NA	AT5G21090
	TraesCS3D02G463900	chr3D:567902730-567903851(+)	F-box family protein	NA	NA
	TraesCS3D02G464000	chr3D:568005847-568007143(-)	F-box family protein	NA	NA
	TraesCS3D02G464100	chr3D:568008728-568011633(+)	F-box family protein	NA	NA
	TraesCS3D02G464200	chr3D:568041166-568042197(-)	nuclear pore anchor	NA	NA
	TraesCS3D02G464300	chr3D:568086787-568089312(-)	Jasmonate O-methyltransferase	NA	NA
	TraesCS3D02G464400	chr3D:568181581-568182270(+)	F-box family protein	NA	NA
	TraesCS3D02G464500	chr3D:568234922-568236055(+)	F-box family protein	NA	NA
	TraesCS3D02G464600	chr3D:568493674-568497001(+)	mediator of RNA polymerase II transcription subunit	NA	NA
	TraesCS3D02G464700	chr3D:568599327-568605230(-)	Sentrin-specific protease	NA	NA
	TraesCS3D02G464800	chr3D:568610950-568612096(+)	Sulfotransferase	Os09g0256100	NA
	TraesCS3D02G464900	chr3D:568654871-568656398(+)	NA	NA	NA
	TraesCS3D02G465000	chr3D:568836712-568837491(-)	E3 ubiquitin-protein ligase BRE1-like protein	Os10g0565600	AT1G55250
	TraesCS3D02G465100	chr3D:568841994-568849330(-)	E3 ubiquitin-protein ligase BRE1-like 2	Os10g0565600	NA
	TraesCS3D02G465200	chr3D:569118263-569119647(-)	F-box family protein	NA	NA
	TraesCS3D02G465300	chr3D:569128291-569129007(-)	F-box family protein	NA	NA
	TraesCS3D02G465400	chr3D:569132339-569134633(+)	F-box family protein	NA	NA
	TraesCS3D02G465500	chr3D:569466001-569467012(-)	F-box family protein	NA	NA
	TraesCS3D02G465600	chr3D:569522632-569528094(+)	Hydroxyethylthiazole kinase	NA	AT3G24030
	TraesCS3D02G465700	chr3D:569547066-569549250(-)	Late embryogenesis abundant (LEA) hydroxyproline-rich glycoprotein family	NA	NA
	TraesCS3D02G465800	chr3D:569555166-569556659(+)	ACT domain repeat 6	NA	NA
	TraesCS3D02G465900	chr3D:569569479-569572324(-)	UV-stimulated scaffold protein A-like protein	Os02g0293800	NA
	TraesCS3D02G466000	chr3D:569675698-569676744(-)	F-box domain containing protein, expressed	NA	NA
	TraesCS3D02G466100	chr3D:569781286-569790562(+)	E3 ubiquitin-protein ligase BRE1-like 2	Os10g0565600	NA
	TraesCS3D02G466300	chr3D:569900119-569901996(+)	Jasmonate O-methyltransferase	NA	NA
	TraesCS3D02G466400	chr3D:569931553-569932060(-)	3-oxo-5-alpha-steroid 4-dehydrogenase family protein	NA	AT4G26055
	TraesCS3D02G466500	chr3D:569976318-569977670(+)	Eukaryotic aspartyl protease family protein	Os01g0937050	NA
	TraesCS3D02G466600	chr3D:570036017-570037813(+)	Transcription factor tfiiic, tau55-like protein, putative	Os04g0530000	NA
	TraesCS3D02G466700	chr3D:570041595-570044537(-)	Embryogenesis transmembrane protein-like	Os12g0141000	NA
	TraesCS3D02G466800	chr3D:570111255-570111812(-)	Salicylate O-methyltransferase	Os06g0314600	NA
	TraesCS3D02G466900	chr3D:570144747-570148207(-)	Jasmonate O-methyltransferase	NA	NA
	TraesCS3D02G467000	chr3D:570158502-570159882(+)	NAC domain-containing protein	Os01g0946200	NA
	TraesCS3D02G467100	chr3D:570270967-570272518(+)	Basic 7S globulin 2	Os01g0937050	NA
	TraesCS3D02G467200	chr3D:570276805-570278279(-)	Basic 7S globulin 2	Os01g0937050	NA
	TraesCS3D02G467300	chr3D:570280982-570282418(+)	Basic 7S globulin	Os01g0937100	NA
	TraesCS3D02G467400	chr3D:570311668-570312258(+)	Basic 7S globulin 2	Os01g0937100	NA
	TraesCS3D02G467500	chr3D:570328433-570329644(+)	Eukaryotic aspartyl protease family protein	Os01g0937100	NA
	TraesCS3D02G467600	chr3D:570379079-570382349(+)	Basic 7S globulin	Os01g0937100	NA
	TraesCS3D02G467700	chr3D:570393635-570394941(+)	Basic 7S globulin 2	Os01g0937100	NA
	TraesCS3D02G467800	chr3D:570399910-570401342(-)	Basic 7S globulin 2	Os01g0937100	NA
	TraesCS3D02G467900	chr3D:570495162-570496385(-)	Basic 7S globulin 2	Os01g0937100	NA
	TraesCS3D02G468000	chr3D:570530421-570534710(+)	NA	Os07g0280200	NA
	TraesCS3D02G468100	chr3D:570559131-570560791(+)	Basic 7S globulin 2	Os01g0937100	NA
	TraesCS3D02G468200	chr3D:570570196-570571621(+)	Basic 7S globulin 2	Os01g0937800	NA
	TraesCS3D02G468300	chr3D:570772415-570774049(+)	Basic 7S globulin 2	Os01g0937600	NA
	TraesCS3D02G468400	chr3D:570801163-570803376(+)	Myb transcription factor	Os02g0189566	NA
	TraesCS3D02G468500	chr3D:570803687-570807001(-)	Transcription initiation factor TFIID subunit 9	Os03g0408500	AT1G54140
	TraesCS3D02G468600	chr3D:570838559-570840464(+)	Oral cancer overexpressed protein 1	Os07g0530300	NA
	TraesCS3D02G468700	chr3D:571014517-571014957(-)	NA	NA	NA
	TraesCS3D02G468800	chr3D:571132830-571139257(-)	NBS-LRR disease resistance protein-like	Os01g0937400	NA
	TraesCS3D02G468900	chr3D:571207950-571210815(+)	F-box protein (DUF295)	NA	NA
	TraesCS3D02G469000	chr3D:571211796-571212578(+)	Periplasmic nitrate reductase	NA	NA
	TraesCS3D02G469100	chr3D:571235770-571240717(-)	NA	Os01g0937300	NA
	TraesCS3D02G469200	chr3D:571361412-571377183(-)	Disease resistance protein (NBS-LRR class) family	Os01g0937400	NA
	TraesCS3D02G469300	chr3D:571493922-571503977(-)	NBS-LRR disease resistance protein-like	Os01g0937300	NA
	TraesCS3D02G469400	chr3D:571513671-571515285(+)	F-box protein	NA	NA
	TraesCS3D02G469500	chr3D:571556783-571568235(-)	Disease resistance protein (NBS-LRR class) family	Os01g0937400	NA
	TraesCS3D02G469600	chr3D:571592337-571592723(-)	Rpl2	CAA33925	NA
	TraesCS3D02G469700	chr3D:571592359-571592856(+)	50S ribosomal protein L2	CAA33928	ATCG00830
	TraesCS3D02G469800	chr3D:571592873-571593484(+)	NA	CAA33936	ATCG00820
	TraesCS3D02G469900	chr3D:571678281-571678748(+)	F-box protein	NA	NA
	TraesCS3D02G470000	chr3D:571822176-571823033(+)	Hydroxyproline-rich glycoprotein	Os01g0937900	NA
	TraesCS3D02G470100	chr3D:571991420-571995838(-)	Calcium-transporting ATPase	Os01g0939100	AT3G57330
	TraesCS3D02G470200	chr3D:572044810-572049410(-)	Sugar transporter, putative	Os07g0106200	AT3G19930
	TraesCS3D02G470300	chr3D:572100682-572103002(-)	Sugar transporter, putative	Os07g0106200	AT3G19930
	TraesCS3D02G470400	chr3D:572425625-572426051(-)	Phosphatidylinositol N-acetylglucosaminyltransferase subunit Y	Os01g0939000	NA
	TraesCS3D02G470500	chr3D:572487178-572490161(-)	Nascent polypeptide-associated complex subunit alpha-like protein	Os01g0938900	AT3G12390
	TraesCS3D02G470600	chr3D:572507731-572510389(-)	NA	Os01g0938900	AT3G12390
	TraesCS3D02G470700	chr3D:572739364-572744281(+)	Hydroxyproline-rich glycoprotein-like	Os01g0938600	NA
	TraesCS3D02G470800	chr3D:572790910-572793147(+)	Phosphatidylinositol N-acetylglucosaminyltransferase subunit Y	Os01g0939000	NA
	TraesCS3D02G470900	chr3D:573118693-573121867(+)	Phosphate transporter	Os12g0180100	AT5G44370
	TraesCS3D02G471000	chr3D:573402497-573404533(+)	Protein kinase	NA	NA
	TraesCS3D02G471100	chr3D:573682531-573685118(+)	NA	Os05g0324100	AT3G56330
	TraesCS3D02G471200	chr3D:573690171-573691639(+)	Pimeloyl-[acyl-carrier protein] methyl ester esterase	Os01g0636400	AT2G18360
	TraesCS3D02G471300	chr3D:573727564-573729042(+)	F-box family protein	NA	NA
	TraesCS3D02G471400	chr3D:573765225-573769738(-)	PAX-interacting protein 1	Os01g0939300	NA
	TraesCS3D02G471500	chr3D:573870662-573872668(-)	NA	Os03g0439500	NA
	TraesCS3D02G471600	chr3D:573906879-573908262(+)	Serpin family protein	NA	NA
	TraesCS3D02G471700	chr3D:573908401-573910897(-)	general regulatory factor 1	Os01g0939400	NA
	TraesCS3D02G471800	chr3D:573919525-573921227(-)	transmembrane protein, putative (DUF594)	NA	NA
	TraesCS3D02G471900	chr3D:573967000-573967545(+)	2-oxoglutarate (2OG) and Fe(II)-dependent oxygenase superfamily protein	Os03g0439500	NA
	TraesCS3D02G472000	chr3D:574118271-574125655(-)	Receptor-like protein kinase, putative,expressed	Os02g0472700	NA
	TraesCS3D02G472100	chr3D:574227779-574230495(+)	Eukaryotic peptide chain release factor subunit 1-1	Os01g0939500	AT1G12920
	TraesCS3D02G472200	chr3D:574238569-574239924(+)	Eukaryotic peptide chain release factor subunit 1-1	Os01g0939500	AT1G12920
	TraesCS3D02G472300	chr3D:574240699-574242199(-)	Leucine-rich repeat receptor-like kinase	Os11g0514500	NA
	TraesCS3D02G472400	chr3D:574424669-574427498(+)	Pentatricopeptide repeat-containing protein	Os01g0153250	AT1G63320
	TraesCS3D02G472500	chr3D:574484122-574485135(-)	F-box protein	NA	NA
	TraesCS3D02G472600	chr3D:574768130-574768957(-)	Disease resistance protein RPM1	NA	NA
	TraesCS3D02G472700	chr3D:574769011-574771238(-)	Disease resistance protein (TIR-NBS-LRR class) family	NA	NA
	TraesCS3D02G472800	chr3D:574779668-574780291(-)	Disease resistance protein RPP13	NA	NA
	TraesCS3D02G472900	chr3D:574781383-574782853(-)	disease resistance protein (TIR-NBS-LRR class) family protein	NA	NA
	TraesCS3D02G473000	chr3D:574821751-574827185(-)	S-formylglutathione hydrolase	Os01g0939700	AT2G41530
	TraesCS3D02G473100	chr3D:574854993-574856736(-)	Cortactin-binding protein 2	NA	NA
	TraesCS3D02G473200	chr3D:574857416-574858996(-)	Leucine-rich repeat receptor-like kinase	NA	NA
	TraesCS3D02G473300	chr3D:574888387-574889052(-)	CASP-like protein	NA	NA
	TraesCS3D02G473400	chr3D:574916504-574919777(+)	Potassium transporter	Os02g0518600	AT4G13420
	TraesCS3D02G473500	chr3D:574983642-574984838(+)	Tyrosyl-DNA phosphodiesterase 2	NA	NA
	TraesCS3D02G473600	chr3D:575125986-575130294(-)	Glycerol-3-phosphate dehydrogenase [NAD(+)]	Os01g0939600	AT2G41540
	TraesCS3D02G473700	chr3D:575478543-575482637(+)	NBS-LRR-like resistance protein	Os01g0947700	NA
	TraesCS3D02G473800	chr3D:575486939-575489166(+)	NA	NA	NA
	TraesCS3D02G473900	chr3D:575489220-575490047(+)	Disease resistance protein RPM1	NA	NA
	TraesCS3D02G474000	chr3D:575525832-575530855(+)	NA	Os01g0937300	NA
	TraesCS3D02G474100	chr3D:575535370-575535882(+)	Disease resistance protein RPP13	NA	NA
	TraesCS3D02G474200	chr3D:575536046-575537832(+)	NBS-LRR-like resistance protein	NA	NA
	TraesCS3D02G474300	chr3D:575545283-575549439(+)	NBS-LRR-like resistance protein	Os01g0937300	NA
	TraesCS3D02G474400	chr3D:575592525-575599914(-)	F-box protein	Os01g0946850	NA
	TraesCS3D02G474500	chr3D:575618108-575618815(+)	Arabinogalactan peptide 3	Os01g0559750	NA
	TraesCS3D02G474600	chr3D:575631389-575632891(+)	Cytochrome P450, putative, expressed	Os03g0140100	NA
	TraesCS3D02G474700	chr3D:575673684-575681453(+)	Pleiotropic drug resistance ABC transporter	Os01g0609300	AT1G15520
	TraesCS3D02G474800	chr3D:575725783-575727116(+)	Expansin protein	Os03g0102700	NA
	TraesCS3D02G474900	chr3D:575732638-575734176(-)	Cytochrome P450, putative, expressed	NA	NA
	TraesCS3D02G475000	chr3D:575736767-575738260(-)	Beta-1,3-glucanase	Os01g0947000	NA
	TraesCS3D02G475100	chr3D:575739377-575740827(-)	Beta-1,3-glucanase	Os01g0947000	NA
	TraesCS3D02G475200	chr3D:575758467-575760020(-)	Beta-1,3-glucanase	Os01g0940700	NA
	TraesCS3D02G475300	chr3D:575836105-575840581(-)	Bax inhibitor-1 family protein	Os07g0177300	AT1G03070
	TraesCS3D02G475400	chr3D:575847501-575853403(+)	NA	Os05g0345500	AT2G30600
	TraesCS3D02G475500	chr3D:575853412-575854346(-)	high chlorophyll fluorescence 153	Os01g0940600	NA
	TraesCS3D02G475600	chr3D:576563356-576570534(+)	Phosphotransferase	Os01g0940100	AT1G50460
	TraesCS3D02G475800	chr3D:576755407-576758217(-)	Cytokinin oxidase/dehydrogenase	Os01g0940000	AT2G41510
qHA4B.1	TraesCS4B02G219300	chr4B:462204417-462205679(+)	Regulator of Vps4 activity in the MVB pathway protein, putative	Os03g0257500	NA
	TraesCS4B02G219400	chr4B:462211619-462212752(+)	Regulator of Vps4 activity in the MVB pathway protein, putative	Os03g0257500	NA
	TraesCS4B02G219500	chr4B:462215688-462215963(-)	LYR motif-containing protein 4	Os08g0239000	AT5G61220
	TraesCS4B02G219600	chr4B:462216244-462220079(+)	Imidazole glycerol phosphate synthase subunit HisH	Os03g0257000	AT3G29280
	TraesCS4B02G219700	chr4B:462220791-462238540(+)	Rho GTPase-activating protein	Os03g0256800	NA
	TraesCS4B02G219800	chr4B:462504682-462510963(+)	Imidazole glycerol phosphate synthase subunit HisF	Os03g0256400	AT4G26900
	TraesCS4B02G219900	chr4B:462536088-462536970(-)	Cytochrome c-type protein TorY	NA	NA
	TraesCS4B02G220000	chr4B:462592105-462593024(+)	Ankyrin repeat-containing protein	Os03g0255900	NA
	TraesCS4B02G220100	chr4B:462696728-462697625(+)	Ankyrin repeat family protein	Os03g0255900	NA
	TraesCS4B02G220200	chr4B:463208678-463213325(+)	Phosphoenolpyruvate carboxykinase (ATP)-like protein	Os03g0255500	AT4G37870
	TraesCS4B02G220400	chr4B:463580208-463584477(+)	Chaperone protein DnaJ	Os03g0255200	NA
	TraesCS4B02G220500	chr4B:463709244-463715223(+)	Beta-galactosidase	Os03g0255100	AT2G28470
	TraesCS4B02G220700	chr4B:464156491-464161145(+)	E3 ubiquitin-protein ligase	Os03g0254900	AT3G53410
	TraesCS4B02G220800	chr4B:464163479-464167927(+)	Chorismate synthase	Os03g0254800	AT1G48850
	TraesCS4B02G220900	chr4B:464217201-464226536(+)	NA	Os03g0254700	AT1G80490
	TraesCS4B02G221000	chr4B:464953308-464955403(-)	Patatin	Os03g0254400	NA
	TraesCS4B02G221100	chr4B:465026332-465029543(-)	Tyrosine-specific transport protein	Os03g0254200	NA
	TraesCS4B02G221200	chr4B:465457589-465462309(+)	Disease resistance protein (NBS-LRR class) family	Os03g0254000	NA
	TraesCS4B02G221300	chr4B:465476934-465487940(-)	Type I inositol-1,4,5-trisphosphate 5-phosphatase	Os03g0238300	NA
	TraesCS4B02G221400	chr4B:465731837-465737985(+)	Mitochondrial import inner membrane translocase subunit Tim21	Os03g0253800	AT4G00026
	TraesCS4B02G221500	chr4B:465741524-465743760(+)	Clathrin heavy chain	Os03g0253600	NA
	TraesCS4B02G221600	chr4B:465777826-465780475(+)	RING zinc finger protein, putative	Os02g0301000	AT1G01350
	TraesCS4B02G221700	chr4B:466016166-466021927(+)	G-patch domain containing protein, expressed	Os03g0253500	NA
	TraesCS4B02G221800	chr4B:466058377-466059930(-)	Kinase family protein	Os03g0253200	NA
	TraesCS4B02G221900	chr4B:466589019-466593016(+)	Phosphomevalonate kinase	Os03g0253100	AT1G31910
	TraesCS4B02G222000	chr4B:466640087-466640805(+)	RADIALIS-like transcription factor	Os03g0252900	NA
	TraesCS4B02G222100	chr4B:466696861-466701030(+)	8-amino-7-oxononanoate synthase	Os03g0252800	AT4G36480
	TraesCS4B02G222200	chr4B:466785791-466788026(+)	alpha/beta-Hydrolases superfamily protein	Os03g0252100	NA
	TraesCS4B02G222300	chr4B:466960623-466965434(+)	Transcription initiation factor IIF subunit alpha	Os03g0251800	NA
	TraesCS4B02G222400	chr4B:466967552-466969914(-)	Receptor-like kinase	Os03g0251700	NA
	TraesCS4B02G222500	chr4B:467100632-467102584(+)	FAD-binding Berberine family protein, putative	Os02g0235900	NA
	TraesCS4B02G222600	chr4B:467108094-467111498(+)	Calcium lipid binding protein, putative	Os03g0251600	AT3G61050
	TraesCS4B02G222700	chr4B:467271000-467278387(-)	NA	Os03g0251500	AT4G39080
	TraesCS4B02G222800	chr4B:467348777-467349040(-)	ATP-dependent caseinolytic (Clp) protease/crotonase family protein	NA	NA
	TraesCS4B02G222900	chr4B:467711906-467712732(-)	Alpha-1,3-mannosyl-glycoprotein 4-beta-N-acetylglucosaminyltransferase A	NA	NA
	TraesCS4B02G223000	chr4B:467716892-467718672(+)	Nuclear factor Y subunit C	Os03g0251350	NA
	TraesCS4B02G223100	chr4B:467796585-467799257(+)	Chaperone protein dnaJ	Os03g0244000	AT1G75690
	TraesCS4B02G223200	chr4B:467802675-467803854(+)	Glutathione S-transferase T3	NA	NA
	TraesCS4B02G223300	chr4B:467902662-467906957(+)	HVA22-like protein	Os03g0250200	AT1G19950
	TraesCS4B02G223400	chr4B:467908832-467912924(+)	NA	Os03g0250000	AT4G38810
	TraesCS4B02G223500	chr4B:467914778-467919130(-)	DNA topoisomerase 1	Os03g0249900	AT1G19990
	TraesCS4B02G223600	chr4B:468001132-468001823(+)	Oxidoreductase/ transition metal ion binding protein	Os03g0249700	NA
	TraesCS4B02G223700	chr4B:468048651-468052030(-)	UDP-glucuronate 4-epimerase 4	Os03g0249500	AT4G00110
	TraesCS4B02G223800	chr4B:468236306-468240989(-)	Chloride conductance regulatory protein ICln	Os03g0249300	NA
	TraesCS4B02G223900	chr4B:468272524-468276980(-)	Peptide chain release factor 1	Os03g0249200	AT1G62850
	TraesCS4B02G224000	chr4B:468454066-468455922(-)	Irk-interacting protein	Os03g0249100	NA
	TraesCS4B02G224100	chr4B:468663172-468671188(-)	Ankyrin repeat protein-like	Os03g0275300	NA
	TraesCS4B02G224200	chr4B:469011404-469016751(+)	Autophagy protein 9	Os03g0248000	NA
	TraesCS4B02G224300	chr4B:469033316-469036307(-)	Bifunctional uridylyltransferase/uridylyl-removing enzyme	Os03g0247900	NA
	TraesCS4B02G224400	chr4B:469246736-469249043(-)	NA	Os03g0247100	NA
	TraesCS4B02G224500	chr4B:469504166-469511139(+)	ATP-dependent Clp protease ATP-binding subunit	Os03g0247000	NA
qHA4B.2	TraesCS4B02G226500	chr4B:473568648-473572265(-)	Auxin influx transporter	Os03g0244600	AT2G21050
	TraesCS4B02G226600	chr4B:473578812-473580153(-)	Anthocyanin 3'-O-beta-glucosyltransferase	NA	NA
	TraesCS4B02G226700	chr4B:473866797-473868871(+)	UDP-glycosyltransferase	NA	NA
	TraesCS4B02G226800	chr4B:474377924-474380699(+)	Pathogenesis-related thaumatin-like protein	Os03g0243900	AT1G20030
	TraesCS4B02G226900	chr4B:474384371-474389024(-)	Calmodulin-lysine N-methyltransferase	Os03g0243800	AT4G35987
	TraesCS4B02G227000	chr4B:475192569-475195958(-)	Endo-1,4-beta-xylanase	Os03g0243700	AT4G38650
	TraesCS4B02G227100	chr4B:475247354-475256784(-)	Acyl-CoA-binding domain protein	Os03g0243600	NA
	TraesCS4B02G227200	chr4B:475802583-475806953(+)	NA	Os03g0243300	AT4G38630
	TraesCS4B02G227300	chr4B:475810763-475813477(+)	Actin-depolymerizing factor	Os03g0243100	AT2G16700
	TraesCS4B02G227400	chr4B:476063643-476066681(+)	Subtilisin-like protease	Os03g0242900	AT4G34980
	TraesCS4B02G227500	chr4B:476184763-476190006(-)	pre-mRNA-splicing factor	NA	NA
	TraesCS4B02G227600	chr4B:476265090-476266676(+)	phytochrome interacting factor 3	Os03g0242300	NA
	TraesCS4B02G227700	chr4B:476358225-476361778(-)	Ras-like protein	Os03g0242200	AT5G64813
	TraesCS4B02G227800	chr4B:476362157-476372635(-)	NA	Os03g0242100	NA
	TraesCS4B02G227900	chr4B:476570584-476571524(-)	Homeobox protein, putative	NA	NA
	TraesCS4B02G228000	chr4B:476854821-476858260(+)	Senescence/dehydration-associated protein-like protein	Os03g0241900	AT4G35985
	TraesCS4B02G228100	chr4B:477144839-477147127(+)	Pentatricopeptide repeat-containing protein, putative	Os03g0241800	AT3G49142
	TraesCS4B02G228200	chr4B:477222946-477230431(+)	Kinase family protein	Os03g0241600	AT1G66150
	TraesCS4B02G228300	chr4B:477227193-477230432(-)	Stress inducible protein coi6.1	Os03g0241300	AT4G35940
	TraesCS4B02G228400	chr4B:477236492-477238482(-)	Ribosomal protein l7ae	Os03g0241200	AT4G22380
	TraesCS4B02G228500	chr4B:479151678-479156978(-)	TSL-kinase interacting protein 1	Os03g0241100	NA
	TraesCS4B02G228600	chr4B:479226496-479230212(+)	NA	Os03g0240700	NA
	TraesCS4B02G228700	chr4B:479397918-479399629(+)	U-box domain-containing protein	Os03g0240600	AT1G66160
	TraesCS4B02G228900	chr4B:479673310-479677211(+)	Translocase of chloroplast	Os03g0240500	AT5G05000
	TraesCS4B02G229000	chr4B:479677297-479681876(-)	TATA box-binding protein-associated factor RNA polymerase I subunit C, putative	Os03g0240400	NA
	TraesCS4B02G229100	chr4B:480046625-480055011(+)	NA	Os03g0239400	NA
	TraesCS4B02G229200	chr4B:480059499-480060230(+)	Zinc finger protein	Os03g0239300	AT1G66140
	TraesCS4B02G229300	chr4B:480060832-480064801(-)	Protein OBERON 3	Os03g0239200	AT1G14740
	TraesCS4B02G229400	chr4B:480062932-480064407(+)	Collagen alpha-5(VI) chain	NA	NA
	TraesCS4B02G229500	chr4B:480590209-480593470(+)	Xyloglucan endotransglucosylase/hydrolase	Os03g0239000	AT2G01850
	TraesCS4B02G229600	chr4B:480593455-480599587(-)	NA	Os03g0238800	AT1G14710
	TraesCS4B02G229700	chr4B:480651270-480658071(-)	Kinase-like protein	Os03g0274800	AT2G01820
	TraesCS4B02G229800	chr4B:480834046-480835343(-)	Serpin family protein	NA	NA
	TraesCS4B02G229900	chr4B:480918675-480922831(+)	Prolyl 3-hydroxylase 2	Os03g0238700	NA
	TraesCS4B02G230000	chr4B:480923529-480925936(-)	NA	Os03g0238600	AT2G01890
	TraesCS4B02G230100	chr4B:481233765-481237258(+)	Type I inositol-1,4,5-trisphosphate 5-phosphatase	Os03g0238300	AT2G01900
	TraesCS4B02G230200	chr4B:481492440-481493409(+)	Recombination-associated protein RdgC	Os03g0237950	NA
	TraesCS4B02G230300	chr4B:481521411-481523605(+)	Cyclin-J18-like	NA	AT2G01905
	TraesCS4B02G230500	chr4B:481598252-481604285(+)	NA	Os03g0237600	AT2G01910
	TraesCS4B02G230600	chr4B:481637504-481641254(-)	Protein Hikeshi	Os03g0237500	AT1G66080
	TraesCS4B02G230700	chr4B:481801117-481802807(+)	GAGA-binding transcriptional activator	Os03g0237401	AT2G01930
	TraesCS4B02G230800	chr4B:482137122-482141384(+)	Zinc finger family protein	Os03g0237250	AT2G01940
	TraesCS4B02G230900	chr4B:482653246-482667381(-)	Anaphase-promoting complex subunit 6-like protein	Os03g0236966	AT1G78770
	TraesCS4B02G231000	chr4B:482778235-482779032(-)	biotin/lipoyl attachment domain-containing protein	Os03g0236900	NA
	TraesCS4B02G231100	chr4B:482779571-482780200(-)	Anaphase promoting complex/cyclosome subunit	Os03g0236800	NA
	TraesCS4B02G231200	chr4B:482978106-482978756(-)	MYB-related transcription factor	Os03g0236300	NA
	TraesCS4B02G231300	chr4B:482983429-482985295(-)	MYB-related transcription factor	Os03g0236300	NA
	TraesCS4B02G231400	chr4B:483333116-483335523(-)	Glutamate decarboxylase	Os03g0236200	AT2G02010
	TraesCS4B02G231500	chr4B:483508916-483514108(+)	Peptide transporter	Os03g0235900	AT2G02040
	TraesCS4B02G231600	chr4B:483514698-483515750(-)	RNA polymerase II, Rpb4, core protein	NA	NA
	TraesCS4B02G231700	chr4B:483578024-483584267(+)	Peptide transporter	Os03g0235700	AT2G02040
	TraesCS4B02G231800	chr4B:483697193-483700020(+)	Peptide transporter	Os03g0235700	AT2G02040
	TraesCS4B02G231900	chr4B:483744051-483750431(+)	RNA-dependent RNA polymerase	Os04g0465700	NA
	TraesCS4B02G232000	chr4B:483751248-483755172(+)	Peptide transporter	Os03g0235300	AT2G02040
	TraesCS4B02G232100	chr4B:483759462-483763425(+)	NA	Os03g0235300	AT2G02040
	TraesCS4B02G232200	chr4B:483763857-483765740(-)	Pentatricopeptide repeat-containing protein	Os03g0235200	NA
	TraesCS4B02G232300	chr4B:483766139-483770123(-)	LisH and RanBPM domains containing protein	Os03g0235100	AT1G61150
	TraesCS4B02G232400	chr4B:483905778-483910097(-)	F-box family protein	NA	AT2G02030
	TraesCS4B02G232500	chr4B:483937686-483939429(-)	F-box family protein	NA	NA
	TraesCS4B02G232600	chr4B:483939506-483941445(+)	B3 domain-containing protein	NA	NA
	TraesCS4B02G232700	chr4B:483946615-483948494(+)	Peroxidase	Os03g0235000	AT5G19890
	TraesCS4B02G232800	chr4B:483950844-483952878(+)	Peroxidase	Os03g0234900	AT5G06720
	TraesCS4B02G232900	chr4B:484094941-484104287(+)	Hydroxyproline-rich glycoprotein	Os03g0234600	NA
	TraesCS4B02G233000	chr4B:484104545-484106134(-)	Peroxidase	Os03g0234500	AT5G06720
	TraesCS4B02G233100	chr4B:484580244-484582127(+)	Ubiquitin	Os03g0234200	AT1G65350
	TraesCS4B02G233300	chr4B:484769949-484774796(+)	Metal tolerance protein	Os03g0226400	AT3G58060
	TraesCS4B02G233400	chr4B:485546311-485553627(+)	Stress response protein nst1	Os03g0226600	NA
qHA4B.3	TraesCS4B02G368100	chr4B:654674693-654675729(-)	myosin 2	NA	NA
	TraesCS4B02G368200	chr4B:654699101-654699538(-)	Cortical cell-delineating protein	Os03g0103200	NA
	TraesCS4B02G368300	chr4B:654719678-654720109(-)	Cortical cell-delineating protein	Os03g0103100	NA
	TraesCS4B02G368400	chr4B:654731472-654731861(-)	Cortical cell-delineating protein	Os10g0552700	NA
	TraesCS4B02G368500	chr4B:654734070-654734513(-)	Cortical cell-delineating protein	NA	NA
	TraesCS4B02G368600	chr4B:654751596-654752033(-)	Cortical cell-delineating protein	Os03g0103200	NA
	TraesCS4B02G368700	chr4B:654761835-654762272(-)	Cortical cell-delineating protein	Os03g0103100	NA
	TraesCS4B02G368800	chr4B:654774041-654774478(-)	Cortical cell-delineating protein	Os03g0103100	NA
	TraesCS4B02G368900	chr4B:654793453-654793824(-)	Cortical cell-delineating protein	Os03g0103200	NA
	TraesCS4B02G369000	chr4B:654806594-654806983(-)	Cortical cell-delineating protein	Os03g0103100	NA
	TraesCS4B02G369100	chr4B:654810532-654811005(-)	Cortical cell-delineating protein	NA	NA
	TraesCS4B02G369200	chr4B:654892610-654894282(+)	HXXXD-type acyl-transferase family protein	NA	NA
	TraesCS4B02G369300	chr4B:654924853-654925540(-)	14 kDa proline-rich protein DC2.15	NA	NA
	TraesCS4B02G369400	chr4B:654965422-654965826(-)	Cortical cell-delineating protein	NA	NA
	TraesCS4B02G369500	chr4B:655036289-655036693(-)	14 kDa proline-rich protein DC2.15	NA	NA
	TraesCS4B02G369600	chr4B:655091831-655092268(-)	Cortical cell-delineating protein	Os10g0552700	NA
	TraesCS4B02G369700	chr4B:655111018-655111407(-)	Cortical cell-delineating protein	Os10g0552700	NA
	TraesCS4B02G369800	chr4B:655174323-655175339(+)	Zinc finger protein	NA	NA
	TraesCS4B02G369900	chr4B:655753649-655754932(+)	C2H2-like zinc finger protein	Os10g0554001	NA
	TraesCS4B02G370000	chr4B:655771123-655774984(-)	T-box transcription factor, putative (DUF863)	NA	NA
	TraesCS4B02G370100	chr4B:655791980-655792243(+)	GRF zinc finger family protein	NA	NA
	TraesCS4B02G370200	chr4B:656159507-656164423(+)	Flavin-containing monooxygenase	Os10g0553800	AT1G62620
	TraesCS4B02G370300	chr4B:656165914-656166201(-)	B3 domain-containing protein family	NA	NA
	TraesCS4B02G370400	chr4B:656262472-656265736(+)	Flavin-containing monooxygenase	Os10g0553800	AT1G62620
	TraesCS4B02G370500	chr4B:656284674-656287060(+)	Flavin-containing monooxygenase	Os10g0553800	AT1G62620
	TraesCS4B02G370600	chr4B:656326666-656327079(+)	Cortical cell-delineating protein	NA	NA
	TraesCS4B02G370700	chr4B:656329793-656330206(+)	Cortical cell-delineating protein	NA	NA
	TraesCS4B02G370800	chr4B:656815048-656817444(+)	Sodium transporter family protein	Os01g0307500	NA
	TraesCS4B02G371000	chr4B:656821274-656828454(+)	Nitrate transporter 1.1	Os03g0103000	AT1G12110
	TraesCS4B02G371100	chr4B:656878737-656883479(+)	Disease resistance protein (NBS-LRR class) family	NA	NA
	TraesCS4B02G371200	chr4B:656891495-656893325(+)	Glycosyltransferase	NA	NA
	TraesCS4B02G371300	chr4B:656899576-656903057(+)	Palmitoyl protein thioesterase containing protein, expressed	Os10g0563000	AT3G60340
	TraesCS4B02G371400	chr4B:656903504-656911031(-)	Protein ARABIDILLO 1	Os10g0563200	AT2G44900
	TraesCS4B02G371500	chr4B:657159331-657160442(+)	BTB/POZ and MATH domain-containing protein 1	NA	NA
	TraesCS4B02G371600	chr4B:657165491-657170782(-)	Protein kinase	Os10g0561500	NA
	TraesCS4B02G371700	chr4B:657171824-657176698(-)	NA	Os10g0561300	AT5G61520
	TraesCS4B02G371800	chr4B:657182353-657184517(-)	Phosphoglycerate mutase family protein	Os03g0101500	NA
	TraesCS4B02G371900	chr4B:657184891-657188101(-)	Alcohol dehydrogenase	Os03g0101600	AT5G61510
	TraesCS4B02G372000	chr4B:657232525-657233073(-)	DNA topoisomerase	NA	NA
	TraesCS4B02G372100	chr4B:657243113-657246017(+)	Leucine-rich repeat receptor protein kinase family protein	Os03g0440900	AT5G21090
	TraesCS4B02G372200	chr4B:657270914-657273316(+)	Leucine-rich repeat receptor-like protein kinase family	Os01g0279800	AT5G21090
	TraesCS4B02G372300	chr4B:657288602-657290831(+)	Nucellin-like aspartic protease	NA	NA
	TraesCS4B02G372400	chr4B:657295234-657309808(-)	Receptor-like protein kinase	NA	NA
	TraesCS4B02G372500	chr4B:657459383-657460566(+)	F-box domain containing protein	NA	NA
	TraesCS4B02G372600	chr4B:657466910-657474689(-)	Helicase, putative	NA	AT2G44980
	TraesCS4B02G372700	chr4B:657515589-657517678(+)	Zinc finger constans-like protein	NA	NA
	TraesCS4B02G372800	chr4B:657604534-657605937(-)	F-box family protein	NA	NA
	TraesCS4B02G372900	chr4B:657641226-657645429(-)	Disease resistance protein	NA	NA
	TraesCS4B02G373000	chr4B:657803763-657804353(-)	protein kinase family protein	NA	NA
	TraesCS4B02G373100	chr4B:657807972-657811408(+)	Cell number regulator 6	Os03g0101800	AT2G45010
	TraesCS4B02G373200	chr4B:657822221-657825980(+)	Phosphatidylserine decarboxylase proenzyme	Os03g0101900	AT4G16700
	TraesCS4B02G373300	chr4B:657827827-657828114(+)	B3 domain-containing protein family	NA	NA
	TraesCS4B02G373400	chr4B:657977741-657983272(+)	Coatomer subunit alpha	Os09g0127800	AT1G62020
	TraesCS4B02G373500	chr4B:657986736-657987231(-)	Transmembrane protein, putative	Os03g0102000	NA
	TraesCS4B02G373600	chr4B:657989337-657991890(+)	Methionyl-tRNA formyltransferase	Os03g0102100	AT4G17360
	TraesCS4B02G373700	chr4B:657991716-657993829(-)	auxin canalization protein (DUF828)	Os10g0560000	NA
	TraesCS4B02G373800	chr4B:658001951-658004404(+)	BTB/POZ domain containing protein, expressed	NA	NA
	TraesCS4B02G373900	chr4B:658020261-658020683(+)	BTB/POZ domain containing protein	NA	NA
	TraesCS4B02G374000	chr4B:658166283-658167487(+)	DNA-directed RNA polymerase subunit	Os03g0102200	AT3G16980
	TraesCS4B02G374100	chr4B:658167816-658169937(+)	NA	Os10g0558900	NA
	TraesCS4B02G374200	chr4B:658170193-658172005(+)	2-oxoglutarate (2OG) and Fe(II)-dependent oxygenase superfamily protein	Os10g0558900	NA
	TraesCS4B02G374300	chr4B:658172330-658174072(+)	2-oxoglutarate (2OG) and Fe(II)-dependent oxygenase superfamily protein	Os10g0558900	NA
	TraesCS4B02G374400	chr4B:658211040-658212993(+)	GATA transcription factor	Os10g0557600	AT2G45050
	TraesCS4B02G374500	chr4B:658518046-658521730(-)	Chaperone protein clpB	NA	NA
	TraesCS4B02G374600	chr4B:658612610-658613404(-)	Chaperone protein ClpB	NA	NA
	TraesCS4B02G374700	chr4B:658643585-658644379(-)	Chaperone protein ClpB	NA	NA
	TraesCS4B02G374800	chr4B:658771762-658782331(-)	ATP-dependent RNA helicase	Os08g0335000	AT1G32490
	TraesCS4B02G374900	chr4B:659002281-659003836(-)	GTP binding Elongation factor Tu family protein	NA	NA
	TraesCS4B02G375000	chr4B:659145664-659153680(+)	2-phosphoglycerate kinase, putative, expressed	Os03g0102400	AT5G61450
	TraesCS4B02G375100	chr4B:659154074-659173043(-)	CCR4-NOT transcription complex subunit 1	Os10g0556700	NA
	TraesCS4B02G375200	chr4B:659328881-659331319(-)	Expansin protein	Os10g0556100	AT2G45110
	TraesCS4B02G375300	chr4B:659481853-659485452(-)	Serine/threonine-protein kinase	Os08g0179000	NA
	TraesCS4B02G375400	chr4B:659497468-659501087(-)	Serine/threonine-protein kinase	Os08g0179000	NA
	TraesCS4B02G375500	chr4B:659512252-659513851(-)	Serine/threonine-protein kinase	NA	NA
	TraesCS4B02G375600	chr4B:659519951-659522073(+)	Expansin protein	Os03g0102700	AT2G45110
	TraesCS4B02G375700	chr4B:659534754-659535312(-)	Cysteine/Histidine-rich C1 domain family protein	NA	NA
	TraesCS4B02G375800	chr4B:659568934-659583635(+)	Nitrate transporter 1.1	Os10g0554200	AT1G12110
	TraesCS4B02G375900	chr4B:659583916-659590441(-)	Oxysterol-binding protein	Os10g0554100	AT2G31030
	TraesCS4B02G376000	chr4B:659664756-659666893(-)	Sodium transporter family protein	Os01g0307500	NA
	TraesCS4B02G376100	chr4B:659688184-659689650(-)	Gibberellin 2-beta-dioxygenase	Os04g0522500	NA
	TraesCS4B02G376200	chr4B:660089828-660092743(+)	Gibberellin 2-beta-dioxygenase	Os04g0522500	NA
	TraesCS4B02G376300	chr4B:660107651-660110569(-)	NA	Os03g0100900	AT4G17486
	TraesCS4B02G376400	chr4B:660114717-660121424(-)	Plasma membrane ATPase	Os03g0100800	AT5G62670
	TraesCS4B02G376500	chr4B:660139625-660140620(-)	PRA1 family protein	NA	NA
	TraesCS4B02G376600	chr4B:660145247-660146437(-)	Phosphoribosylformylglycinamidine synthase subunit PurL	NA	NA
	TraesCS4B02G376700	chr4B:660178745-660179270(-)	Germin-like protein	Os08g0189400	NA
	TraesCS4B02G376800	chr4B:660194860-660197570(-)	Serine/threonine-protein kinase	Os01g0669100	NA
	TraesCS4B02G376900	chr4B:660246865-660248029(-)	Germin-like protein	Os08g0189400	AT5G39150
	TraesCS4B02G377000	chr4B:660250774-660251831(-)	Germin-like protein	Os08g0189400	AT5G39110
	TraesCS4B02G377100	chr4B:660282551-660288669(-)	Germin-like protein	Os08g0189400	AT5G39110
	TraesCS4B02G377200	chr4B:660296048-660296863(-)	Germin-like protein	Os08g0189400	AT5G39110
	TraesCS4B02G377300	chr4B:660320575-660321389(-)	Germin-like protein	Os08g0189400	AT5G39110
	TraesCS4B02G377400	chr4B:660329220-660330034(-)	Germin-like protein	Os08g0189400	AT5G39110
	TraesCS4B02G377500	chr4B:660336167-660337205(-)	Germin-like protein	Os08g0189400	AT5G39110
	TraesCS4B02G377600	chr4B:660352578-660356106(+)	Phospholipase D	Os06g0604400	AT3G15730
	TraesCS4B02G377700	chr4B:660359043-660359579(+)	Germin-like protein	Os08g0189400	AT5G39150
	TraesCS4B02G377800	chr4B:660380996-660381817(-)	Germin-like protein	Os08g0189400	AT5G39110
	TraesCS4B02G377900	chr4B:660390379-660397845(-)	Germin-like protein	Os08g0189850	AT5G39110
	TraesCS4B02G378000	chr4B:660400748-660401763(-)	Germin-like protein	Os08g0189400	AT5G39110
	TraesCS4B02G378100	chr4B:660410375-660411496(-)	Germin-like protein	Os08g0189400	AT5G39110
	TraesCS4B02G378200	chr4B:660416108-660417267(-)	Germin-like protein	Os08g0189850	AT5G39110
	TraesCS4B02G378300	chr4B:660434454-660436292(-)	Germin-like protein	Os08g0189400	AT5G39110
	TraesCS4B02G378400	chr4B:660445454-660446575(-)	Germin-like protein	Os08g0189850	AT5G39110
	TraesCS4B02G378500	chr4B:660447217-660463829(-)	tRNA/rRNA methyltransferase family protein	Os03g0100500	NA
	TraesCS4B02G378700	chr4B:660464821-660469567(-)	DNA repair endonuclease UVH1	Os03g0100400	AT5G41150
	TraesCS4B02G378800	chr4B:660469673-660472270(-)	Peptidyl-prolyl cis-trans isomerase	Os03g0100300	NA
	TraesCS4B02G379000	chr4B:660494781-660495944(-)	Alkyl transferase	Os01g0857200	AT5G58770
	TraesCS4B02G379100	chr4B:660518550-660519802(+)	Protein FLOWERING LOCUS T	Os01g0748800	AT1G65480
	TraesCS4B02G379200	chr4B:660572882-660581373(+)	Calcineurin B-like protein	Os10g0564800	AT5G47100
	TraesCS4B02G379300	chr4B:660582267-660583286(+)	Casein kinase II subunit beta	Os10g0564900	AT2G44680
	TraesCS4B02G379500	chr4B:660588235-660589311(+)	Pterin-4-alpha-carbinolamine dehydratase, putative	Os03g0100200	NA
	TraesCS4B02G379600	chr4B:660589291-660590027(-)	Invertase inhibitor	NA	NA
	TraesCS4B02G379700	chr4B:660590206-660591393(-)	Phosphatidylinositol N-acetylglucosaminyltransferase subunit P	NA	AT1G61280
	TraesCS4B02G379800	chr4B:660591208-660595620(+)	NA	NA	NA
	TraesCS4B02G379900	chr4B:660594418-660595698(-)	Ribose-phosphate pyrophosphokinase	Os03g0100040	AT2G44530
	TraesCS4B02G380000	chr4B:660596274-660599227(-)	Protein NRT1/ PTR FAMILY 5.1	NA	NA
	TraesCS4B02G380100	chr4B:660652546-660654067(+)	C2 domain-containing family protein	Os07g0500300	NA
	TraesCS4B02G380200	chr4B:660655365-660657652(-)	CAAX protease self-immunity protein	Os03g0100030	AT2G35260
	TraesCS4B02G380300	chr4B:660661443-660665281(+)	glycosyltransferase family exostosin protein	Os03g0107900	AT5G22940
	TraesCS4B02G380400	chr4B:660665857-660668660(-)	Arsenate reductase	Os03g0108000	AT5G03455
	TraesCS4B02G380500	chr4B:660676241-660676976(-)	Protein FLOWERING LOCUS T	Os05g0518000	AT1G65480
	TraesCS4B02G380600	chr4B:660683396-660684953(-)	Protein FLOWERING LOCUS T	Os01g0748800	AT1G65480
	TraesCS4B02G380700	chr4B:660705120-660707282(-)	Trichome birefringence-like protein	Os06g0272850	NA
	TraesCS4B02G380800	chr4B:660722760-660729781(+)	ATP-dependent chaperone ClpB	Os03g0426900	AT5G15450
	TraesCS4B02G380900	chr4B:660874169-660880469(+)	RING/U-box superfamily protein	NA	NA
	TraesCS4B02G381000	chr4B:660904524-660910478(+)	RING-finger ubiquitin ligase	NA	NA
	TraesCS4B02G381100	chr4B:660929823-660936351(+)	RING/U-box superfamily protein	NA	NA
	TraesCS4B02G381200	chr4B:660940620-660944513(+)	Divalent metal cation transporter MntH	Os03g0700800	NA
	TraesCS4B02G381300	chr4B:661143306-661144856(+)	Carboxyl methyltransferase	Os02g0719600	NA
	TraesCS4B02G381400	chr4B:661150504-661151927(-)	Cortactin-binding protein 2	NA	NA
	TraesCS4B02G381500	chr4B:661168341-661171229(-)	Apyrase	Os12g0123500	NA
	TraesCS4B02G381600	chr4B:661185709-661191597(-)	Apyrase	Os12g0123500	NA
	TraesCS4B02G381700	chr4B:661256495-661257108(+)	Protein B602L	NA	NA
	TraesCS4B02G381800	chr4B:661304015-661306150(+)	Metacaspase-1	Os03g0388900	NA
	TraesCS4B02G381900	chr4B:661493212-661496488(+)	Protein phosphatase 2c, putative	NA	NA
	TraesCS4B02G382000	chr4B:661497661-661502048(-)	NA	NA	NA
	TraesCS4B02G382100	chr4B:661629550-661632795(-)	Leucine-rich repeat receptor-like protein kinase family protein	NA	NA
	TraesCS4B02G382200	chr4B:661641797-661642138(+)	Non-specific lipid-transfer protein	Os05g0477900	NA
	TraesCS4B02G382300	chr4B:661660140-661662090(-)	NA	NA	NA
	TraesCS4B02G382400	chr4B:661680808-661682247(-)	Phosphatase 2C family protein	Os03g0275100	AT1G07630
	TraesCS4B02G382500	chr4B:661682257-661683366(-)	Protein phosphatase 2C	NA	NA
	TraesCS4B02G382600	chr4B:662001216-662009974(+)	Disease resistance protein (NBS-LRR class) family	NA	NA
	TraesCS4B02G382700	chr4B:662144758-662148442(+)	NA	NA	NA
	TraesCS4B02G382800	chr4B:662156801-662157574(+)	Dirigent protein	NA	NA
	TraesCS4B02G382900	chr4B:662380840-662383186(-)	Vacuolar protein sorting-associated protein 2-like 1	Os03g0108400	AT5G22950
	TraesCS4B02G383000	chr4B:662401027-662402631(+)	Xyloglucan endotransglucosylase/hydrolase	Os03g0108300	AT2G36870
	TraesCS4B02G383100	chr4B:662419077-662421508(-)	Metacaspase-1	Os03g0388900	NA
	TraesCS4B02G383200	chr4B:662458013-662459004(-)	Heat shock transcription factor	NA	NA
	TraesCS4B02G383300	chr4B:662469975-662471090(-)	Heat shock transcription factor	NA	NA
	TraesCS4B02G383400	chr4B:662535668-662536833(-)	Heat shock transcription factor	NA	NA
	TraesCS4B02G383500	chr4B:662719273-662720079(-)	O-methyltransferase-like protein	NA	NA
	TraesCS4B02G383600	chr4B:662765456-662770670(+)	F-box family protein	NA	NA
	TraesCS4B02G383700	chr4B:663102554-663106891(+)	Benzyl alcohol O-benzoyltransferase	NA	NA
qHA4D	TraesCS4D02G068200	chr4D:43553461-43556455(+)	WRKY transcription factor	Os12g0597700	NA
	TraesCS4D02G068300	chr4D:43613256-43620416(-)	p-loop containing nucleoside triphosphate hydrolases superfamily protein	Os03g0628800	AT1G04280
	TraesCS4D02G068400	chr4D:43643578-43653334(-)	RNA-binding KH domain-containing protein	Os03g0627500	NA
	TraesCS4D02G068500	chr4D:43667933-43672307(-)	NA	Os03g0627300	AT4G19540
	TraesCS4D02G068600	chr4D:44042285-44042766(+)	tryptophan aminotransferase related 2	NA	NA
	TraesCS4D02G068700	chr4D:44200785-44205826(-)	Calcineurin B-like protein	Os03g0626800	AT4G26570
	TraesCS4D02G068800	chr4D:44418954-44425006(+)	Protein DETOXIFICATION	Os03g0626700	AT3G26590
	TraesCS4D02G068900	chr4D:44431202-44437454(+)	Protein DETOXIFICATION	Os03g0626700	AT3G26590
	TraesCS4D02G069000	chr4D:44439869-44446717(-)	Protein DA1-related 1	Os03g0626600	NA
	TraesCS4D02G069100	chr4D:44542805-44546218(-)	Dormancy-associated protein/auxin-repressed protein	Os11g0671000	AT2G33830
	TraesCS4D02G069200	chr4D:44742114-44745006(+)	neurofilament heavy protein	NA	NA
	TraesCS4D02G069300	chr4D:44745660-44748007(-)	NA	Os03g0626500	AT1G47510
	TraesCS4D02G069400	chr4D:44749324-44752163(-)	Mitochondrial import receptor subunit TOM6-like protein	Os03g0626200	NA
	TraesCS4D02G069500	chr4D:44755042-44756744(-)	UDP-glycosyltransferase	Os07g0241500	NA
	TraesCS4D02G069600	chr4D:44835919-44840427(-)	RING/U-box superfamily protein	Os03g0625800	NA
	TraesCS4D02G069800	chr4D:44977603-44983615(+)	WD40 repeat-like protein	Os01g0183100	AT3G10530
	TraesCS4D02G070000	chr4D:45249030-45249242(+)	Deoxyuridine 5'-triphosphate nucleotidohydrolase	Os03g0669100	AT3G46940
	TraesCS4D02G070100	chr4D:45609709-45610950(+)	F-box family protein	NA	NA
	TraesCS4D02G070200	chr4D:45643779-45649235(+)	Acetyltransferase component of pyruvate dehydrogenase complex	Os04g0394200	AT5G55070
	TraesCS4D02G070300	chr4D:45664514-45668209(-)	NA	NA	NA
	TraesCS4D02G070400	chr4D:45699317-45705080(-)	RING/U-box superfamily protein	Os03g0625800	NA
	TraesCS4D02G070500	chr4D:45711326-45712856(+)	Metacaspase-1	NA	NA
	TraesCS4D02G070600	chr4D:45717714-45721283(-)	RING/U-box superfamily protein	Os03g0625800	NA
	TraesCS4D02G070700	chr4D:46024558-46037754(+)	Exocyst complex component SEC3A	Os03g0625700	AT1G47550
	TraesCS4D02G070800	chr4D:46137629-46138467(-)	HVA22-like protein	NA	NA
	TraesCS4D02G070900	chr4D:46175987-46176385(+)	myb domain protein 33	NA	NA
	TraesCS4D02G071000	chr4D:46176971-46178425(+)	WD40-repeat protein	Os03g0625300	NA
	TraesCS4D02G071100	chr4D:46185958-46187385(-)	WD40-repeat protein	Os12g0594000	NA
	TraesCS4D02G071200	chr4D:46290974-46293134(-)	NAC domain protein,	Os03g0624600	NA
	TraesCS4D02G071300	chr4D:46425842-46431892(-)	Myb family transcription factor-like protein	Os03g0624000	NA
	TraesCS4D02G071400	chr4D:46592302-46596012(+)	caspase-6 protein	Os03g0622600	NA
	TraesCS4D02G071500	chr4D:46596500-46597942(-)	B3 domain-containing protein	Os03g0622200	NA
	TraesCS4D02G071600	chr4D:46603172-46605688(-)	NA	Os03g0621650	NA
	TraesCS4D02G071700	chr4D:46619443-46624145(+)	B3 domain-containing protein	Os03g0620500	NA
	TraesCS4D02G071800	chr4D:46627376-46628136(-)	APO RNA-binding protein (DUF794)	NA	NA
	TraesCS4D02G071900	chr4D:46653304-46658739(+)	B3 domain-containing protein	Os03g0621900	NA
	TraesCS4D02G072000	chr4D:46724533-46731692(+)	Eukaryotic aspartyl protease family protein	NA	NA
	TraesCS4D02G072100	chr4D:47322417-47330748(+)	APO RNA-binding protein (DUF794)	NA	NA
	TraesCS4D02G072200	chr4D:47334365-47337469(-)	B3 domain-containing protein	Os03g0620500	NA
	TraesCS4D02G072300	chr4D:47438732-47440956(+)	FLOWERING LOCUS T protein, putative	Os11g0293800	AT4G20370
	TraesCS4D02G072400	chr4D:47484987-47493747(-)	NA	Os11g0293900	NA
	TraesCS4D02G072500	chr4D:47493884-47502781(+)	Histidine triad nucleotide-binding protein	Os11g0295000	AT5G48545
	TraesCS4D02G072600	chr4D:47521377-47523251(-)	Amino acid transporter family protein, putative	Os11g0298000	AT5G16740
	TraesCS4D02G072700	chr4D:47529220-47535767(+)	NA	Os11g0297900	AT3G24730
	TraesCS4D02G072800	chr4D:47533898-47539225(-)	NA	Os11g0297800	AT1G78060
	TraesCS4D02G072900	chr4D:47554011-47554172(-)	Ribosomal protein L2	NA	NA
	TraesCS4D02G073000	chr4D:47658833-47660424(-)	Phospholipase a1-chloroplastic-like	Os11g0299300	AT2G31690
	TraesCS4D02G073100	chr4D:47746491-47748143(-)	Phospholipase a1-chloroplastic-like	Os11g0299300	NA
	TraesCS4D02G073200	chr4D:47849922-47854685(+)	Haloacid dehalogenase-like hydrolase family protein	Os11g0300400	NA
	TraesCS4D02G073300	chr4D:47894407-47898925(+)	Receptor-like kinase	Os11g0300600	AT1G67510
	TraesCS4D02G073400	chr4D:47980290-47986028(+)	NA	Os11g0302500	AT5G50375
	TraesCS4D02G073500	chr4D:47990881-47991812(+)	Thioredoxin	Os08g0378900	AT3G06730
	TraesCS4D02G073600	chr4D:48001761-48003427(-)	O-methyltransferase family protein, expressed	Os11g0303600	NA
	TraesCS4D02G073700	chr4D:48059255-48061098(-)	O-methyltransferase	Os11g0303600	NA
	TraesCS4D02G073800	chr4D:48120145-48121677(-)	O-methyltransferase family protein, expressed	Os11g0306400	NA
	TraesCS4D02G073900	chr4D:48536135-48538403(-)	T-box transcription factor, putative (DUF863)	NA	AT5G67390
	TraesCS4D02G074000	chr4D:48594521-48599370(+)	WD repeat protein-like	Os07g0589400	AT5G66240
	TraesCS4D02G074100	chr4D:48599521-48605918(-)	Receptor protein kinase-like protein	Os11g0308800	NA
	TraesCS4D02G074200	chr4D:48699852-48713671(+)	ATP-dependent RNA helicase, putative	Os11g0310800	AT1G27900
	TraesCS4D02G074300	chr4D:48714528-48718392(+)	Exosome complex component	Os11g0311300	AT1G60080
	TraesCS4D02G074400	chr4D:48719042-48722436(-)	Dolichol phosphate-mannose biosynthesis regulatory protein	Os11g0311550	AT1G74340
	TraesCS4D02G074500	chr4D:49083624-49086651(-)	4-coumarate-CoA ligase	NA	NA
	TraesCS4D02G074600	chr4D:49243723-49252533(+)	4-coumarate--CoA ligase like	Os07g0280200	NA
	TraesCS4D02G074700	chr4D:49294385-49302929(-)	4-coumarate--CoA ligase like	Os07g0280200	NA
	TraesCS4D02G074800	chr4D:49367090-49370017(-)	Cysteine proteinase	Os11g0255300	AT5G50260
	TraesCS4D02G074900	chr4D:49498850-49501066(-)	Adenine/guanine permease	Os11g0427700	AT5G50300
	TraesCS4D02G075000	chr4D:49578551-49581273(-)	Remorin	NA	NA
	TraesCS4D02G075100	chr4D:49784556-49786971(+)	Mitochondrial import receptor subunit TOM5	Os03g0603500	AT5G08040
	TraesCS4D02G075200	chr4D:49859588-49863991(+)	Pentatricopeptide repeat-containing protein	Os07g0615000	AT1G63630
	TraesCS4D02G075300	chr4D:49889494-49891187(+)	Presenilin	Os03g0603800	NA
	TraesCS4D02G075400	chr4D:49892138-49894052(-)	Zinc finger protein, putative	NA	NA
	TraesCS4D02G075500	chr4D:49936299-49938101(-)	Glycosyltransferase family 92 protein	NA	NA
	TraesCS4D02G075600	chr4D:50070792-50072237(+)	UDP-glucose 6-dehydrogenase	Os03g0604200	AT1G26570
	TraesCS4D02G075700	chr4D:50150733-50154043(+)	Transcriptional adapter 1	Os12g0580500	AT2G14850
	TraesCS4D02G075800	chr4D:50327119-50328066(+)	A-kinase anchor protein 9, putative isoform 1	Os03g0604566	AT5G67390
	TraesCS4D02G075900	chr4D:50354864-50360822(-)	myosin-2 heavy chain-like protein	Os03g0604600	NA
	TraesCS4D02G076000	chr4D:50641002-50644244(+)	Subtilisin-like protease	Os03g0605300	AT5G67360
	TraesCS4D02G076100	chr4D:50757723-50758993(+)	RING/U-box superfamily protein	NA	NA
	TraesCS4D02G076200	chr4D:50769402-50771961(-)	glutamyl-tRNA (Gln) amidotransferase subunit A (DUF620)	Os03g0606100	AT1G27690
	TraesCS4D02G076300	chr4D:50792297-50792620(-)	Zinc finger CCHC domain-containing protein 12	NA	NA
	TraesCS4D02G076400	chr4D:50888586-50889461(-)	Gibberellin-regulated protein 1	Os03g0607200	AT2G14900
	TraesCS4D02G076500	chr4D:50974900-50977709(-)	Metal transporter	Os12g0581600	AT2G23150
	TraesCS4D02G076600	chr4D:50990222-51006711(-)	Methionine S-methyltransferase	Os05g0105000	AT5G49810
	TraesCS4D02G076700	chr4D:51007653-51010870(-)	Myb/SANT-like DNA-binding domain protein	NA	NA
	TraesCS4D02G076800	chr4D:51071696-51077502(+)	MAR-binding filament-like protein	Os03g0607500	AT2G14910
	TraesCS4D02G076900	chr4D:51286599-51288866(+)	Cyclin	Os03g0607600	AT5G43080
	TraesCS4D02G077000	chr4D:51295762-51296753(-)	Zinc finger-like protein	Os03g0607700	NA
	TraesCS4D02G077100	chr4D:51314635-51315295(-)	OBF binding protein 1	Os03g0608000	NA
qHA5D	TraesCS5D02G524200	chr5D:543499669-543503819(-)	F-box domain containing protein	NA	NA
	TraesCS5D02G524300	chr5D:543507035-543508866(-)	F-box domain containing protein	NA	NA
	TraesCS5D02G524400	chr5D:543535686-543536675(-)	F-box domain containing protein	NA	NA
	TraesCS5D02G524500	chr5D:543585925-543587650(-)	L-threonine 3-dehydrogenase	NA	AT4G13010
	TraesCS5D02G524600	chr5D:543596185-543600775(-)	Phospholipase D	Os07g0260400	AT4G35790
	TraesCS5D02G524700	chr5D:543602251-543604197(-)	MICOS complex subunit Mic10-like protein (DUF543)	Os03g0840900	AT1G72170
	TraesCS5D02G524800	chr5D:543608944-543612338(-)	Protein kinase family protein	Os03g0841100	NA
	TraesCS5D02G524900	chr5D:543669600-543670664(-)	F-box family protein	NA	NA
	TraesCS5D02G525000	chr5D:543687440-543694159(-)	Protein kinase family protein	NA	NA
	TraesCS5D02G525200	chr5D:543746129-543748553(+)	BTB/POZ/MATH-domain protein	NA	NA
	TraesCS5D02G525300	chr5D:543771942-543772802(+)	Leucine-rich repeat receptor-like protein kinase	NA	NA
	TraesCS5D02G525400	chr5D:543776518-543777718(+)	Leucine-rich repeat receptor-like protein kinase	NA	NA
	TraesCS5D02G525500	chr5D:543803619-543804446(+)	Leucine-rich repeat receptor-like protein kinase	NA	NA
	TraesCS5D02G525600	chr5D:543817184-543818145(+)	Leucine-rich repeat receptor-like protein kinase	NA	NA
	TraesCS5D02G525700	chr5D:543830395-543831797(+)	Leucine-rich repeat receptor-like protein kinase	NA	NA
	TraesCS5D02G525800	chr5D:543835017-543838207(+)	F-box family protein	NA	NA
	TraesCS5D02G525900	chr5D:543838347-543843667(-)	NA	NA	NA
	TraesCS5D02G526000	chr5D:543856550-543859719(-)	F-box protein	NA	NA
	TraesCS5D02G526200	chr5D:544148899-544150516(+)	Leucine-rich repeat receptor-like protein kinase	NA	NA
	TraesCS5D02G526300	chr5D:544231277-544233104(+)	Leucine-rich repeat receptor-like protein kinase	NA	NA
	TraesCS5D02G526400	chr5D:544284634-544287390(-)	F-box protein	NA	NA
	TraesCS5D02G526500	chr5D:544457037-544459421(+)	F-box family protein	NA	NA
	TraesCS5D02G526600	chr5D:544459879-544461150(+)	Leucine-rich repeat receptor-like protein kinase	NA	NA
	TraesCS5D02G526700	chr5D:544477342-544481045(+)	F-box family protein	NA	NA
	TraesCS5D02G526800	chr5D:544481557-544483275(+)	Leucine-rich repeat receptor-like protein kinase family	NA	NA
	TraesCS5D02G526900	chr5D:544491355-544492183(+)	Ice recrystallization inhibition protein-like protein	NA	NA
	TraesCS5D02G527000	chr5D:544532579-544533793(+)	Leucine-rich repeat receptor-like protein kinase	NA	NA
	TraesCS5D02G527100	chr5D:544611899-544615156(+)	Prohibitin	Os03g0841700	AT4G28510
	TraesCS5D02G527300	chr5D:544625602-544629045(+)	F-box family protein	NA	NA
	TraesCS5D02G527400	chr5D:544629047-544629673(+)	Phosphoribosylformylglycinamidine synthase subunit PurL	NA	NA
	TraesCS5D02G527500	chr5D:544695877-544698087(-)	Receptor-like kinase	Os01g0116800	NA
	TraesCS5D02G527600	chr5D:544699439-544702185(+)	Receptor-like kinase	NA	NA
	TraesCS5D02G527700	chr5D:544799018-544800238(+)	Expansin	Os03g0428700	AT1G20190
	TraesCS5D02G527800	chr5D:544816816-544818118(+)	Expansin	Os03g0428700	AT1G20190
	TraesCS5D02G527900	chr5D:545111386-545112999(-)	Glycosyltransferase	Os03g0841600	NA
	TraesCS5D02G528000	chr5D:545122751-545124924(-)	Patatin	NA	NA
	TraesCS5D02G528100	chr5D:545145290-545147401(+)	Patatin	NA	NA
	TraesCS5D02G528300	chr5D:545207402-545209090(+)	3-ketoacyl-CoA synthase	Os09g0521100	NA
	TraesCS5D02G528400	chr5D:545210939-545215621(-)	Protein kinase	Os03g0841800	AT1G09840
	TraesCS5D02G528500	chr5D:545216117-545226761(-)	Carotenoid isomerase	Os03g0841900	AT1G57770
	TraesCS5D02G528600	chr5D:545280823-545284051(-)	O-methyltransferase	Os08g0157500	AT5G54160
	TraesCS5D02G528700	chr5D:545523515-545526025(+)	GrpE protein homolog	NA	NA
	TraesCS5D02G528800	chr5D:545533530-545534827(+)	Cortactin-binding protein 2	NA	NA
	TraesCS5D02G528900	chr5D:545764741-545766001(-)	transmembrane protein, putative (DUF594)	NA	NA
	TraesCS5D02G529000	chr5D:545921587-545923207(+)	Aspartic proteinase nepenthesin	NA	NA
	TraesCS5D02G529100	chr5D:545926550-545933137(+)	Vacuolar protein sorting-associated protein 9A	Os03g0842700	NA
	TraesCS5D02G529200	chr5D:545943087-545944933(-)	Short-chain dehydrogenase/reductase family protein	Os03g0842900	AT4G10020
	TraesCS5D02G529300	chr5D:545967656-545970026(+)	Ulp1 protease family, carboxy-terminal domain protein	NA	NA
	TraesCS5D02G529400	chr5D:546007810-546009523(-)	Protein kinase superfamily protein	NA	NA
	TraesCS5D02G529500	chr5D:546075053-546077276(-)	Ras-related protein, expressed	Os03g0843100	AT1G09630
	TraesCS5D02G529600	chr5D:546080634-546084588(+)	YacP-like NYN domain protein	Os03g0843200	NA
	TraesCS5D02G529700	chr5D:546084705-546087351(-)	Late embryogenesis abundant protein Lea14	Os03g0843300	AT2G44060
	TraesCS5D02G529800	chr5D:546302927-546304511(+)	Protein O-linked-mannose beta-1,4-N-acetylglucosaminyltransferase 2	NA	NA
	TraesCS5D02G529900	chr5D:546365855-546366582(+)	GCK domain-containing protein	NA	NA
	TraesCS5D02G530000	chr5D:546454980-546455603(+)	Proline-rich receptor-like protein kinase PERK1	NA	NA
	TraesCS5D02G530100	chr5D:546566054-546567836(+)	Tropinone reductase-like protein	NA	AT2G29370
	TraesCS5D02G530200	chr5D:546649028-546651269(+)	30S ribosomal protein S6	Os03g0843400	NA
	TraesCS5D02G530300	chr5D:546651779-546657365(-)	Luc7-like protein	Os03g0843500	AT5G17440
	TraesCS5D02G530400	chr5D:546678820-546681068(-)	Sister chromatid cohesion protein DCC1	Os05g0119600	AT2G44580
	TraesCS5D02G530500	chr5D:546682623-546684156(+)	NA	Os03g0843900	NA
	TraesCS5D02G530600	chr5D:546687753-546690173(+)	Serine/threonine-protein kinase	Os03g0844100	NA
	TraesCS5D02G530700	chr5D:546695539-546703266(+)	Ion channel DMI1	Os03g0843600	AT5G49960
	TraesCS5D02G530800	chr5D:546819301-546820725(+)	Thiopurine S-methyltransferase family protein, expressed	Os03g0843800	NA
	TraesCS5D02G530900	chr5D:546820679-546825262(-)	Poly(ADP-ribose) glycohydrolase 1	Os03g0843900	NA
	TraesCS5D02G531000	chr5D:546825426-546827787(+)	Pentatricopeptide repeat-containing protein	Os03g0844000	NA
	TraesCS5D02G531100	chr5D:546858080-546865594(+)	Zinc finger MYND domain-containing protein 15	Os07g0481000	AT1G70150
	TraesCS5D02G531200	chr5D:546906214-546913767(-)	Protein kinase-like protein	Os03g0844100	AT3G59350
	TraesCS5D02G531300	chr5D:546917879-546922510(+)	Serine/threonine protein phosphatase 2A regulatory subunit B	Os03g0844500	AT1G13460
	TraesCS5D02G531400	chr5D:546921823-546924651(-)	GDSL esterase/lipase	Os03g0844600	NA
	TraesCS5D02G531500	chr5D:547049137-547049953(+)	Elongation factor Tu	Os03g0844800	NA
	TraesCS5D02G531600	chr5D:547049945-547057967(-)	NA	Os03g0844700	NA
	TraesCS5D02G531700	chr5D:547065459-547067863(+)	Amino acid transporter, putative	Os03g0375966	AT3G13620
	TraesCS5D02G531800	chr5D:547069168-547071896(+)	ER lumen protein-retaining receptor	Os11g0473000	AT3G25040
	TraesCS5D02G531900	chr5D:547255987-547258068(+)	transmembrane protein, putative (DUF594)	NA	NA
	TraesCS5D02G532000	chr5D:547260823-547262224(-)	Pectate lyase	Os08g0286100	AT5G09280
	TraesCS5D02G532100	chr5D:547273461-547277281(-)	Polyribonucleotide nucleotidyltransferase	Os03g0844900	NA
	TraesCS5D02G532200	chr5D:547418179-547421464(+)	Erythronate-4-phosphate dehydrogenase family protein, putative	NA	NA
	TraesCS5D02G532300	chr5D:547430974-547431494(+)	Translation initiation factor 1A	Os03g0114200	AT2G40780
	TraesCS5D02G532400	chr5D:547436060-547460160(+)	NA	NA	NA
	TraesCS5D02G532500	chr5D:547501182-547528872(+)	Receptor-like protein kinase	NA	NA
	TraesCS5D02G532600	chr5D:547541975-547546825(+)	NA	Os02g0492900	NA
	TraesCS5D02G532700	chr5D:547606762-547610770(-)	ATP-dependent RNA helicase	Os03g0158200	AT3G53110
	TraesCS5D02G532800	chr5D:547704729-547715318(+)	Ankyrin repeat protein-like	NA	NA
	TraesCS5D02G532900	chr5D:547716315-547721425(-)	NA	NA	NA
	TraesCS5D02G533000	chr5D:547806911-547810799(+)	Eukaryotic aspartyl protease family protein	NA	NA
	TraesCS5D02G533100	chr5D:547839680-547841503(-)	Pirin-like protein	Os03g0845000	AT3G59220
	TraesCS5D02G533200	chr5D:547882596-547884329(-)	Pirin-like protein	Os03g0845000	AT2G43120
	TraesCS5D02G533400	chr5D:547891364-547893112(-)	Pirin-like protein	Os03g0845000	AT2G43120
	TraesCS5D02G533500	chr5D:547924781-547926716(-)	Pirin-like protein	Os03g0845000	AT2G43120
	TraesCS5D02G533600	chr5D:547984056-547987307(-)	RNA binding protein	NA	NA
	TraesCS5D02G533700	chr5D:547995847-548004609(-)	Long-chain-fatty-acid CoA ligase, putative	Os03g0845500	AT3G23790
	TraesCS5D02G533800	chr5D:548022328-548031311(-)	NA	Os03g0845500	AT3G23790
	TraesCS5D02G534000	chr5D:548348572-548354652(+)	NA	Os03g0847600	NA
	TraesCS5D02G534100	chr5D:548362023-548369486(+)	myb-like protein X	Os03g0847800	NA
	TraesCS5D02G534200	chr5D:548460504-548461745(+)	ROP-interactive CRIB motif protein	Os03g0847900	NA
	TraesCS5D02G534300	chr5D:548479492-548480622(+)	ROP-interactive CRIB motif protein	Os03g0847900	NA
	TraesCS5D02G534400	chr5D:548483000-548485474(-)	Purple acid phosphatase	NA	NA
	TraesCS5D02G534500	chr5D:548623922-548629223(-)	GPI transamidase subunit PIG-U family protein	Os02g0688900	AT1G63110
	TraesCS5D02G534600	chr5D:548878906-548884637(-)	Aspartokinase	Os03g0850400	AT5G13280
	TraesCS5D02G534700	chr5D:548953413-548954021(-)	Invertase inhibitor	NA	NA
	TraesCS5D02G534800	chr5D:548972170-548973846(-)	transmembrane protein, putative (DUF594)	Os05g0508500	NA
	TraesCS5D02G534900	chr5D:548979329-548981302(-)	Ubiquitin carboxyl-terminal hydrolase 2	Os05g0508500	NA
	TraesCS5D02G535000	chr5D:548989293-548991731(+)	Ubiquitin carboxyl-terminal hydrolase 2	Os05g0508500	NA
	TraesCS5D02G535100	chr5D:549228079-549229787(-)	Cytochrome P450	Os03g0850200	AT4G39950
	TraesCS5D02G535200	chr5D:549260395-549262167(-)	Cytochrome P450	Os04g0174100	AT4G39950
	TraesCS5D02G535300	chr5D:549308379-549309601(+)	RING/U-box superfamily protein	Os02g0178600	NA
	TraesCS5D02G535400	chr5D:549323862-549325912(+)	Cytochrome P450	Os03g0850200	NA
	TraesCS5D02G535500	chr5D:549329889-549331313(-)	Expansin	Os05g0277000	AT4G01630
	TraesCS5D02G535600	chr5D:549428485-549430245(-)	Cytochrome P450	Os03g0850200	AT4G39950
	TraesCS5D02G535700	chr5D:549546567-549548330(-)	Cytochrome P450	Os04g0174100	AT4G39950
	TraesCS5D02G535800	chr5D:549573707-549579551(+)	CTD small phosphatase-like protein	Os03g0850100	AT5G11860
	TraesCS5D02G535900	chr5D:549581669-549587267(+)	disease resistance protein (TIR-NBS-LRR class)	NA	NA
	TraesCS5D02G536000	chr5D:549629652-549631494(+)	NA	Os03g0850000	NA
	TraesCS5D02G536100	chr5D:549631107-549635538(-)	Mitochondrial carrier protein, putative	Os05g0361900	AT4G39460
	TraesCS5D02G536200	chr5D:549646796-549648756(+)	Glycosyltransferase	Os03g0849900	NA
	TraesCS5D02G536300	chr5D:549654910-549655134(+)	MAM domain-containing glycosylphosphatidylinositol anchor protein 2	NA	NA
	TraesCS5D02G536400	chr5D:549655745-549657737(-)	NA	Os03g0849900	NA
	TraesCS5D02G536500	chr5D:549770404-549774158(-)	Glycosyltransferase	Os03g0849800	NA
	TraesCS5D02G536600	chr5D:549806349-549807205(+)	Pollen allergen Cyn d 23	NA	NA
	TraesCS5D02G536700	chr5D:549849396-549855426(+)	Conserved oligomeric Golgi complex subunit 2	Os03g0849600	AT4G24840
	TraesCS5D02G536800	chr5D:549855390-549858761(-)	RPM1-interacting protein 4	Os03g0848600	NA
	TraesCS5D02G536900	chr5D:549862326-549868496(+)	Protein kinase family protein	Os10g0162836	NA
	TraesCS5D02G537000	chr5D:549869123-549870994(+)	receptor kinase 1	NA	NA
	TraesCS5D02G537100	chr5D:549872843-549874437(+)	Protein kinase family protein	Os03g0844100	NA
	TraesCS5D02G537200	chr5D:549876508-549880647(+)	Protein kinase family protein	NA	NA
	TraesCS5D02G537300	chr5D:549886841-549890014(+)	B-cell receptor-associated protein 31-like containing protein	Os03g0848400	AT5G48660
	TraesCS5D02G537400	chr5D:550148997-550150349(+)	U3 small nucleolar RNA-associated protein 18-like protein	NA	NA
	TraesCS5D02G537500	chr5D:550151653-550154538(+)	Sucrose transporter	Os02g0576600	NA
	TraesCS5D02G537600	chr5D:550184040-550191990(+)	Aspartokinase	NA	NA
	TraesCS5D02G537700	chr5D:550204524-550206336(+)	Integral membrane protein	Os03g0850600	AT1G28140
	TraesCS5D02G537800	chr5D:550299845-550301021(-)	Glycine rich protein 3	NA	NA
	TraesCS5D02G537900	chr5D:550373280-550374468(-)	Glycine rich protein 3	NA	NA
	TraesCS5D02G538000	chr5D:550400969-550402526(-)	Glycine rich protein 3	NA	NA
	TraesCS5D02G538200	chr5D:550436989-550444336(+)	NA	Os08g0200400	NA
	TraesCS5D02G538300	chr5D:550509636-550512440(-)	Sec14p-like phosphatidylinositol transfer family protein	Os03g0850700	AT1G01630
	TraesCS5D02G538400	chr5D:550576252-550576764(-)	40S ribosomal protein	Os01g0250600	AT1G57540
	TraesCS5D02G538500	chr5D:550578051-550580048(-)	Sec14p-like phosphatidylinositol transfer family protein	Os03g0850700	AT1G01630
	TraesCS5D02G538600	chr5D:550610875-550612488(-)	Sec14p-like phosphatidylinositol transfer family protein	Os03g0850700	AT1G01630
	TraesCS5D02G538700	chr5D:550637277-550639047(-)	Sec14p-like phosphatidylinositol transfer family protein	Os03g0850700	AT1G01630
	TraesCS5D02G538800	chr5D:550639426-550643635(-)	Transferase, transferring glycosyl groups	Os03g0850800	AT3G23760
	TraesCS5D02G538900	chr5D:550646167-550647143(+)	Basic blue protein	Os03g0850900	AT2G02850
	TraesCS5D02G539000	chr5D:550660636-550661377(+)	Basic blue protein, putative	Os03g0850900	NA
	TraesCS5D02G539100	chr5D:550922006-550953048(+)	NA	NA	NA
	TraesCS5D02G539200	chr5D:550964729-550965417(+)	Basic blue protein	Os03g0850900	NA
	TraesCS5D02G539300	chr5D:551016402-551021005(-)	2-oxoglutarate (2OG) and Fe(II)-dependent oxygenase superfamily protein	NA	NA
	TraesCS5D02G539400	chr5D:551021496-551021902(-)	Ubiquitin-fold modifier-conjugating enzyme 1	NA	NA
	TraesCS5D02G539500	chr5D:551024562-551025407(+)	Basic blue protein, putative	Os03g0850900	NA
	TraesCS5D02G539600	chr5D:551057521-551059886(+)	NA	NA	NA
	TraesCS5D02G539700	chr5D:551073776-551075597(+)	F-box family protein	NA	NA
	TraesCS5D02G539800	chr5D:551084946-551086895(-)	F-box family protein	NA	NA
	TraesCS5D02G539900	chr5D:551120033-551121290(+)	F-box domain containing protein, expressed	NA	NA
	TraesCS5D02G540000	chr5D:551242362-551244220(-)	Glycosyltransferase	Os10g0122000	NA
	TraesCS5D02G540100	chr5D:551447654-551449330(+)	F-box domain containing protein, expressed	NA	NA
	TraesCS5D02G540200	chr5D:551467456-551470264(-)	F-box family protein	NA	NA
	TraesCS5D02G540300	chr5D:551543850-551546279(-)	F-box/RNI-like superfamily protein	NA	NA
	TraesCS5D02G540400	chr5D:551744385-551746234(+)	F-box family protein	NA	NA
	TraesCS5D02G540500	chr5D:551830756-551837735(+)	NBS-LRR disease resistance protein-like	NA	NA
	TraesCS5D02G540600	chr5D:551880156-551881355(+)	NBS-LRR disease resistance protein-like protein	NA	NA
	TraesCS5D02G540700	chr5D:551924615-551925247(-)	TRAF-like superfamily protein	NA	NA
	TraesCS5D02G540800	chr5D:551990390-551994460(+)	Cinnamoyl-CoA reductase 4	Os01g0528800	AT5G19440
	TraesCS5D02G540900	chr5D:552027448-552028660(-)	Structural maintenance of chromosomes protein	NA	NA
	TraesCS5D02G541000	chr5D:552031887-552033725(-)	F-box domain containing protein	NA	NA
	TraesCS5D02G541100	chr5D:552036203-552047398(+)	Cinnamoyl-CoA reductase 4	Os01g0528800	AT5G19440
	TraesCS5D02G541200	chr5D:552040877-552042532(-)	F-box family protein	NA	NA
	TraesCS5D02G541300	chr5D:552049622-552051718(-)	NA	NA	NA
	TraesCS5D02G541400	chr5D:552052462-552052892(+)	Homoserine kinase	NA	NA
	TraesCS5D02G541500	chr5D:552127438-552129803(-)	FBD-associated F-box protein	NA	NA
	TraesCS5D02G541600	chr5D:552407352-552409908(+)	Disease resistance protein (CC-NBS-LRR class) family	NA	NA
	TraesCS5D02G541700	chr5D:552420976-552422850(-)	F-box family protein	NA	NA
	TraesCS5D02G541800	chr5D:552442265-552444243(-)	F-box and associated interaction domains-containing protein	NA	NA
	TraesCS5D02G541900	chr5D:552683347-552688698(+)	NA	NA	NA
	TraesCS5D02G542000	chr5D:552697172-552699153(-)	nodulin MtN21 /EamA-like transporter family protein	NA	NA
	TraesCS5D02G542100	chr5D:552707655-552711763(+)	F-box/RNI-like superfamily protein	NA	NA
	TraesCS5D02G542200	chr5D:552729006-552731184(+)	F-box family protein	NA	NA
	TraesCS5D02G542300	chr5D:552781100-552784999(-)	Elongation factor Tu	Os03g0851100	AT4G02930
	TraesCS5D02G542400	chr5D:552789118-552792885(+)	Glutaredoxin	Os03g0851200	AT3G54900
	TraesCS5D02G542500	chr5D:552857038-552861276(-)	NBS-LRR disease resistance protein-like protein	NA	NA
	TraesCS5D02G542600	chr5D:552916586-552920893(+)	Receptor-like protein kinase	Os05g0524732	NA
	TraesCS5D02G542700	chr5D:553059995-553061105(-)	protein kinase family protein	NA	NA
	TraesCS5D02G542800	chr5D:553064001-553065104(+)	Protein kinase family protein	Os06g0581500	NA
	TraesCS5D02G542900	chr5D:553421483-553421944(-)	BLN1-3	NA	NA
	TraesCS5D02G543000	chr5D:553469660-553473445(+)	Receptor-kinase, putative	Os08g0331900	NA
qHA6B.2	TraesCS6B02G345700	chr6B:609372737-609375415(+)	SNW domain-containing protein 1	Os02g0759800	AT1G77180
	TraesCS6B02G345800	chr6B:609379731-609383222(-)	Transport inhibitor response 1-like protein	Os02g0759700	AT5G49980
	TraesCS6B02G345900	chr6B:609841167-609846504(-)	Pentatricopeptide repeat-containing protein	Os02g0759500	AT1G73400
	TraesCS6B02G346000	chr6B:609854033-609855241(-)	E3 ubiquitin-protein ligase	Os02g0759400	AT4G09100
	TraesCS6B02G346100	chr6B:609886384-609888238(+)	Basic helix-loop-helix transcription factor	Os02g0759000	AT5G65320
	TraesCS6B02G346200	chr6B:609925034-609926074(+)	Blue copper protein	Os02g0758800	AT1G22480
	TraesCS6B02G346300	chr6B:610064940-610065673(+)	transcriptional factor B3 family protein	Os02g0758200	NA
	TraesCS6B02G346400	chr6B:610085279-610086236(+)	cyclin a2;1	Os02g0758200	AT5G65300
	TraesCS6B02G346500	chr6B:610233534-610241805(-)	LMBR1 domain-containing 2	Os02g0758100	AT5G65290
	TraesCS6B02G346600	chr6B:610804613-610807774(+)	Myb/SANT-like DNA-binding domain protein	NA	NA
	TraesCS6B02G346700	chr6B:610808586-610809673(-)	Heat-shock protein, putative	Os02g0758000	NA
	TraesCS6B02G346800	chr6B:610810130-610815679(+)	NA	Os02g0757900	AT5G10350
	TraesCS6B02G346900	chr6B:610816393-610817448(+)	NBS-LRR disease resistance protein	NA	NA
	TraesCS6B02G347000	chr6B:611347959-611349662(-)	F-box protein-like	Os02g0757700	AT4G08980
	TraesCS6B02G347100	chr6B:611460347-611461691(-)	Protein EXORDIUM-like 1	Os02g0757100	AT4G08950
	TraesCS6B02G347200	chr6B:611499966-611501337(+)	Protein EXORDIUM-like 1	Os02g0756800	AT4G08950
	TraesCS6B02G347300	chr6B:611504331-611505278(+)	Protein EXORDIUM-like 1	Os02g0756600	AT4G08950
	TraesCS6B02G347400	chr6B:611698227-611699819(+)	Protein EXORDIUM-like 1	Os02g0756200	AT4G08950
	TraesCS6B02G347500	chr6B:612133102-612134230(+)	EPIDERMAL PATTERNING FACTOR-like protein	Os02g0756100	AT5G10310
	TraesCS6B02G347600	chr6B:612197715-612198075(+)	Lipid transfer protein	NA	NA
	TraesCS6B02G347700	chr6B:612269780-612271572(-)	Glycosyltransferase	Os02g0755900	AT1G22360
	TraesCS6B02G347800	chr6B:612743089-612745301(-)	Glycosyltransferase	Os02g0755900	AT1G22400
	TraesCS6B02G347900	chr6B:612847863-612849777(+)	Glycosyltransferase	Os02g0755600	AT1G22360
	TraesCS6B02G348000	chr6B:612857305-612859019(+)	Glycosyltransferase	Os02g0755500	AT1G22370
	TraesCS6B02G348100	chr6B:612859070-612864954(-)	RNA-binding protein	Os02g0755400	AT1G22330
	TraesCS6B02G348200	chr6B:613108356-613111868(-)	Pterin-4-alpha-carbinolamine dehydratase	Os01g0663500	AT1G29810
	TraesCS6B02G348300	chr6B:613112037-613114907(+)	Lysine-specific histone demethylase 1-1-like protein	Os02g0755200	NA
	TraesCS6B02G348400	chr6B:613160278-613161225(-)	Maturase	BAC19891	ATMG00520
	TraesCS6B02G348500	chr6B:613162866-613163120(-)	Na(+)-translocating NADH-quinone reductase subunit F	NA	NA
	TraesCS6B02G348600	chr6B:613187455-613187823(-)	Orf101b	NA	NA
	TraesCS6B02G348700	chr6B:613291487-613298000(+)	S-adenosyl-L-methionine-dependent methyltransferases superfamily protein	Os02g0755000	AT1G78240
	TraesCS6B02G348800	chr6B:613298657-613301334(+)	NA	Os02g0754900	AT4G08930
	TraesCS6B02G348900	chr6B:613573348-613574806(-)	BTB/POZ domain protein	Os02g0754600	NA
	TraesCS6B02G349000	chr6B:613575218-613588354(-)	Glutamyl-tRNA(Gln) amidotransferase subunit A	Os02g0754500	AT5G09420
	TraesCS6B02G349100	chr6B:613610075-613611466(+)	Myb transcription factor	Os08g0433400	AT5G10280
	TraesCS6B02G349200	chr6B:614127307-614128893(+)	Myb transcription factor	Os08g0433400	AT5G10280
	TraesCS6B02G349300	chr6B:614130320-614133168(-)	50S ribosomal protein L29	Os02g0754300	NA
	TraesCS6B02G349400	chr6B:614305597-614310667(+)	DIS3-like exonuclease 2	Os02g0754100	NA
	TraesCS6B02G349500	chr6B:614311734-614313383(+)	Alpha-amylase	Os02g0765400	AT4G25000
	TraesCS6B02G349600	chr6B:614435764-614436219(-)	dicarboxylate transporter 1	NA	NA
	TraesCS6B02G349700	chr6B:614436986-614438709(+)	Alpha-amylase	Os02g0765400	AT4G25000
	TraesCS6B02G349800	chr6B:614582063-614583768(+)	Alpha-amylase	Os02g0765400	AT4G25000
	TraesCS6B02G349900	chr6B:615086071-615087667(-)	LRR and NB-ARC domains-containing disease resistance protein	NA	NA
	TraesCS6B02G350000	chr6B:615166995-615167808(+)	Ethylene-responsive transcription factor	Os02g0764700	NA
	TraesCS6B02G350100	chr6B:615230245-615231076(+)	Ethylene-responsive transcription factor	Os02g0764700	NA
	TraesCS6B02G350200	chr6B:615253158-615257586(+)	F-box domain containing protein-like	NA	NA
	TraesCS6B02G350300	chr6B:615318055-615323841(-)	Myb/SANT-like DNA-binding domain protein	NA	NA
	TraesCS6B02G350400	chr6B:615605331-615606561(+)	Ethylene-responsive transcription factor	Os02g0764700	NA
	TraesCS6B02G350500	chr6B:615636611-615638202(+)	Chlorophyll a-b binding protein, chloroplastic	Os02g0764500	AT1G45474
	TraesCS6B02G350600	chr6B:615638072-615641589(-)	Galactoside 2-alpha-L-fucosyltransferase	Os02g0764400	AT2G03220
	TraesCS6B02G350700	chr6B:615964852-615971424(+)	SprT-like domain-containing protein Spartan	NA	NA
	TraesCS6B02G350800	chr6B:615978204-615995724(-)	RNA polymerase-associated CTR9-like protein	Os07g0476200	NA
	TraesCS6B02G350900	chr6B:616323627-616326662(+)	Galactoside 2-alpha-L-fucosyltransferase	Os02g0763900	NA
	TraesCS6B02G351000	chr6B:616426337-616428825(-)	Galactoside 2-alpha-L-fucosyltransferase	Os02g0764200	NA
	TraesCS6B02G351100	chr6B:616429597-616430124(-)	Peroxidase	NA	NA
	TraesCS6B02G351200	chr6B:616432400-616449765(-)	Galactoside 2-alpha-L-fucosyltransferase	Os02g0763900	NA
	TraesCS6B02G351300	chr6B:616865947-616869408(+)	Galactoside 2-alpha-L-fucosyltransferase	Os02g0763200	NA
	TraesCS6B02G351400	chr6B:616944241-616946066(+)	Galactoside 2-alpha-L-fucosyltransferase	Os02g0763800	NA
	TraesCS6B02G351500	chr6B:617031092-617031991(+)	CAI-1 autoinducer sensor kinase/phosphatase cqsS isoform 1	NA	NA
	TraesCS6B02G351600	chr6B:617037929-617039659(+)	2-oxoglutarate (2OG) and Fe(II)-dependent oxygenase superfamily protein	Os06g0178500	NA
	TraesCS6B02G351700	chr6B:617112210-617113352(-)	Plant cadmium resistance 2	Os02g0763000	AT5G35525
	TraesCS6B02G351800	chr6B:617128423-617128713(+)	Calcium binding family protein	NA	NA
	TraesCS6B02G351900	chr6B:617170393-617183405(+)	DNA repair/recombination protein	Os02g0762800	AT3G19210
	TraesCS6B02G352000	chr6B:617184399-617185990(+)	membrane-associated kinase regulator-like protein	Os02g0762600	NA
	TraesCS6B02G352100	chr6B:617644498-617646161(-)	Cyclin-dependent kinase inhibitor	Os02g0762400	NA
	TraesCS6B02G352300	chr6B:617979561-617984238(-)	Phenylalanine--tRNA ligase alpha subunit	Os10g0400800	AT4G39280
	TraesCS6B02G352400	chr6B:618125158-618130610(+)	NA	Os02g0761700	AT4G37040
	TraesCS6B02G352500	chr6B:618131133-618137910(+)	Peptidyl-prolyl cis-trans isomerase	Os02g0761600	AT4G33380
	TraesCS6B02G352600	chr6B:618330421-618331395(-)	Receptor-like protein kinase	NA	NA
	TraesCS6B02G352700	chr6B:618332135-618337290(-)	Protein kinase family protein, putative, expressed	Os12g0562600	NA
	TraesCS6B02G352800	chr6B:618666635-618667500(+)	Oxidoreductase/transition metal ion-binding protein	Os02g0775300	NA
	TraesCS6B02G353000	chr6B:618935448-618935735(+)	B3 domain-containing protein family	NA	NA
	TraesCS6B02G353100	chr6B:618936336-618940080(+)	NA	Os02g0775200	AT1G77470
	TraesCS6B02G353200	chr6B:618942386-618945171(-)	NA	Os06g0215900	AT1G76690
	TraesCS6B02G353300	chr6B:619023716-619025809(-)	Metal tolerance protein	Os02g0775100	AT3G58060
	TraesCS6B02G353400	chr6B:619030620-619032741(-)	Glycosyltransferase family 92 protein	NA	NA
	TraesCS6B02G353500	chr6B:619404619-619405226(+)	transmembrane protein	Os02g0774200	NA
	TraesCS6B02G353600	chr6B:619483882-619484517(+)	Transmembrane protein, putative	Os02g0774200	NA
	TraesCS6B02G353700	chr6B:619492681-619494113(-)	Thioredoxin	Os02g0774100	NA
	TraesCS6B02G353800	chr6B:619525687-619529993(+)	Protein trichome birefringence	Os02g0773732	NA
	TraesCS6B02G353900	chr6B:619719219-619721667(+)	Growth-regulating factor	Os02g0773600	NA
	TraesCS6B02G354000	chr6B:619728551-619729642(+)	Temperature-induced lipocalin	Os08g0440100	AT5G58070
	TraesCS6B02G354100	chr6B:619861244-619862517(+)	Protein PAM68, chloroplastic-like protein	Os02g0773500	NA
	TraesCS6B02G354200	chr6B:620174465-620184681(-)	NA	Os02g0773400	NA
	TraesCS6B02G354300	chr6B:620261047-620264596(+)	1-aminocyclopropane-1-carboxylate deaminase/D-cysteine desulfhydrase	Os02g0773300	AT1G48420
	TraesCS6B02G354400	chr6B:620264708-620265976(-)	Universal stress protein family protein	Os02g0773200	AT3G53990
	TraesCS6B02G354500	chr6B:620281211-620284081(-)	Cytochrome P450, putative	NA	NA
	TraesCS6B02G354600	chr6B:620707011-620710511(-)	Peroxidase	Os01g0378100	NA
	TraesCS6B02G354700	chr6B:622725092-622727408(+)	Protein XRI1	NA	NA
	TraesCS6B02G354800	chr6B:622729856-622739265(-)	UPF0614 C14orf102-like protein	Os02g0772500	NA
	TraesCS6B02G354900	chr6B:623080774-623084880(-)	NA	Os06g0208100	AT1G73360
	TraesCS6B02G355000	chr6B:623368982-623369821(+)	Embryogenesis-associated protein EMB8	NA	NA
	TraesCS6B02G355200	chr6B:623445433-623446316(+)	Disease-resistance protein RAR1	NA	NA
	TraesCS6B02G355300	chr6B:623442845-623448995(-)	N-acetyltransferase	Os02g0772300	NA
	TraesCS6B02G355400	chr6B:623689954-623696879(-)	Transcription elongation factor SPT5	Os02g0772000	AT4G08350
	TraesCS6B02G355500	chr6B:623724865-623730551(+)	NA	Os02g0771800	NA
	TraesCS6B02G355600	chr6B:623739703-623742959(+)	Glucan endo-1,3-beta-glucosidase 3	Os02g0771700	AT2G05790
	TraesCS6B02G355700	chr6B:624017273-624019350(-)	1-aminocyclopropane-1-carboxylate oxidase	Os02g0771600	AT1G05010
	TraesCS6B02G355800	chr6B:624177393-624178922(-)	1-aminocyclopropane-1-carboxylate oxidase	Os02g0771600	AT1G05010
	TraesCS6B02G355900	chr6B:624311966-624313762(-)	1-aminocyclopropane-1-carboxylate oxidase	Os02g0771600	AT1G05010
	TraesCS6B02G356000	chr6B:624402309-624409704(-)	1-aminocyclopropane-1-carboxylate oxidase	Os02g0771600	AT1G05010
	TraesCS6B02G356200	chr6B:624495761-624497229(-)	1-aminocyclopropane-1-carboxylate oxidase	Os02g0771600	AT1G05010
	TraesCS6B02G356300	chr6B:624785937-624787558(+)	DNA-binding storekeeper protein-related transcriptional regulator	Os02g0771200	NA
	TraesCS6B02G356400	chr6B:624795560-624801969(+)	E3 ubiquitin-protein ligase COP1	Os02g0771100	AT2G32950
	TraesCS6B02G356500	chr6B:624802610-624803729(-)	P-type ATP-ase 1	NA	NA
	TraesCS6B02G356600	chr6B:624860399-624866402(-)	Reticulon-like protein	NA	NA
	TraesCS6B02G356700	chr6B:624882519-624883465(-)	Pimeloyl-[acyl-carrier protein] methyl ester esterase	NA	NA
	TraesCS6B02G356800	chr6B:625241370-625244779(+)	Nitrate reductase	Os02g0770800	AT1G77760
	TraesCS6B02G356900	chr6B:625365345-625378820(+)	Separase, putative	Os02g0770700	NA
	TraesCS6B02G357000	chr6B:625379434-625381386(-)	zinc finger/BTB domain protein, putative (DUF1644)	Os02g0770600	AT4G08460
	TraesCS6B02G357100	chr6B:625536808-625537254(-)	30S ribosomal protein S7, putative	BAC19857	AT2G07696
	TraesCS6B02G357200	chr6B:625615895-625616122(-)	NAD(P)H-quinone oxidoreductase subunit 2, chloroplastic	CAA33920	NA
	TraesCS6B02G357300	chr6B:625616422-625616802(-)	30S ribosomal protein S7	CAA33919	ATCG00900
	TraesCS6B02G357400	chr6B:625649936-625650760(+)	Cytochrome c biogenesis Fc	BAC19894	ATMG00180
	TraesCS6B02G357500	chr6B:625652165-625652464(-)	early nodulin-like protein 10	NA	NA
	TraesCS6B02G357600	chr6B:625778598-625781138(-)	WRKY transcription factor, putative	Os02g0770500	NA
	TraesCS6B02G357700	chr6B:625884650-625885787(-)	Myb family transcription factor family protein	NA	NA
	TraesCS6B02G357800	chr6B:625886934-625891359(-)	Short-chain dehydrogenase/reductase family protein	Os03g0654600	AT5G04900
	TraesCS6B02G357900	chr6B:626212094-626216999(+)	26S proteasome non-atpase regulatory subunit, putative	Os07g0435100	AT1G64520
	TraesCS6B02G358000	chr6B:626450360-626454459(+)	NA	Os02g0770100	NA
	TraesCS6B02G358100	chr6B:626456415-626458167(-)	Pentatricopeptide repeat-containing protein	Os02g0769900	NA
	TraesCS6B02G358300	chr6B:626488227-626525215(-)	Glycosyltransferase	Os05g0527200	NA
	TraesCS6B02G358400	chr6B:626589140-626590604(-)	Pentatricopeptide repeat-containing protein	Os02g0769900	NA
	TraesCS6B02G358600	chr6B:626811889-626813569(+)	Pentatricopeptide repeat-containing protein	Os02g0769900	NA
	TraesCS6B02G358700	chr6B:626882497-626883963(+)	Pentatricopeptide repeat-containing protein	Os02g0769900	NA
	TraesCS6B02G358800	chr6B:626886420-626892443(-)	Protein kinase	Os02g0769800	AT4G08500
	TraesCS6B02G358900	chr6B:630465584-630465913(-)	Chaperone protein dnaJ-like protein	Os02g0506600	NA
	TraesCS6B02G359000	chr6B:630504675-630504998(-)	Chaperone dnaJ-like protein	Os02g0506600	NA
	TraesCS6B02G359100	chr6B:630529246-630529557(-)	Chaperone dnaJ-like protein	Os02g0506600	NA
	TraesCS6B02G359200	chr6B:630540268-630541165(+)	Kinesin heavy chain, putative isoform 1	NA	NA
	TraesCS6B02G359300	chr6B:630846675-630849877(+)	LysM domain-containing GPI-anchored protein 1	Os02g0769200	AT1G21880
	TraesCS6B02G359400	chr6B:631193221-631194157(+)	Auxin-responsive family protein	Os02g0769100	NA
	TraesCS6B02G359500	chr6B:631200466-631203676(-)	LysM domain-containing GPI-anchored protein 1	Os02g0769200	AT1G21880
	TraesCS6B02G359600	chr6B:631245209-631246198(-)	Auxin-responsive family protein	Os02g0769100	NA
	TraesCS6B02G359700	chr6B:631534462-631534815(-)	SAUR-like auxin-responsive family protein	Os02g0769100	NA
	TraesCS6B02G359800	chr6B:631740171-631741196(-)	Auxin-responsive family protein	Os02g0769100	NA
	TraesCS6B02G359900	chr6B:631843546-631843908(-)	Auxin-responsive family protein	Os02g0769100	NA
	TraesCS6B02G360000	chr6B:631950723-631967302(-)	NA	Os02g0768800	NA
	TraesCS6B02G360100	chr6B:632176561-632179355(+)	DNA-binding storekeeper protein-related transcriptional regulator, putative	Os02g0768700	NA
	TraesCS6B02G360200	chr6B:632179674-632182484(-)	Ethylene receptor	NA	NA
	TraesCS6B02G360300	chr6B:632182793-632188473(-)	Inorganic pyrophosphatase	Os02g0768600	AT5G09650
	TraesCS6B02G360400	chr6B:632241128-632244382(+)	WAT1-related protein	Os02g0768300	AT4G08300
	TraesCS6B02G360500	chr6B:632304665-632305774(+)	WAT1-related protein	Os02g0768300	AT4G08300
	TraesCS6B02G360600	chr6B:632419861-632423528(+)	WAT1-related protein	Os02g0768300	AT4G08300
	TraesCS6B02G360700	chr6B:632502656-632504809(+)	WAT1-related protein	Os02g0768300	AT4G08290
	TraesCS6B02G360800	chr6B:632563923-632566684(+)	WAT1-related protein	Os02g0768300	AT4G08300
	TraesCS6B02G360900	chr6B:632786075-632788585(+)	WAT1-related protein	Os02g0768300	AT4G08300
	TraesCS6B02G361000	chr6B:632848627-632851095(+)	Transmembrane emp24 domain-containing protein	Os02g0768200	AT1G21900
	TraesCS6B02G361100	chr6B:632878151-632880112(+)	Hydroxyproline-rich glycoprotein family protein, putative	Os02g0768000	NA
	TraesCS6B02G361200	chr6B:632881153-632882406(-)	Glutaredoxin-like protein	Os02g0767900	AT4G08280
	TraesCS6B02G361300	chr6B:632882579-632885952(+)	Transcription factor TFIIIB component B	NA	NA
	TraesCS6B02G361400	chr6B:632954631-632955979(+)	Ethylene-responsive transcription factor	Os02g0767800	AT1G21910
	TraesCS6B02G361500	chr6B:632961967-632966487(+)	NA	Os02g0767700	NA
	TraesCS6B02G361600	chr6B:632966867-632968058(-)	RING/U-box superfamily protein, putative	Os02g0767600	AT1G21960
	TraesCS6B02G361700	chr6B:633054625-633057928(-)	Protein COBRA	NA	NA
	TraesCS6B02G361800	chr6B:633532903-633536879(+)	Phosphate carrier protein, mitochondrial	Os02g0767500	AT5G14040
	TraesCS6B02G361900	chr6B:633547666-633550347(+)	Serine/threonine-protein kinase	Os02g0767400	NA
	TraesCS6B02G362000	chr6B:633730596-633732366(+)	Glycosyltransferase	Os02g0755900	AT1G22400
	TraesCS6B02G362100	chr6B:633858539-633859821(+)	Flavonol synthase	Os02g0767300	AT5G08640
	TraesCS6B02G362200	chr6B:633896583-633898132(-)	Superoxide dismutase [Cu-Zn]	NA	NA
	TraesCS6B02G362300	chr6B:633903843-633907796(-)	Cyclin-like protein	Os01g0377500	AT2G26430
	TraesCS6B02G362400	chr6B:633910122-633915630(+)	NA	Os03g0363500	AT5G18840
	TraesCS6B02G362500	chr6B:633915826-633917188(-)	zinc/iron-chelating domain protein	Os03g0363400	NA
	TraesCS6B02G362600	chr6B:633918025-633923526(-)	3-oxoacyl-[acyl-carrier-protein] synthase-like protein	Os03g0363200	AT5G04520
	TraesCS6B02G362700	chr6B:634043817-634046937(+)	NA	Os03g0362200	NA
	TraesCS6B02G362800	chr6B:634046893-634049669(-)	NA	Os03g0360700	AT4G21860
	TraesCS6B02G362900	chr6B:634306279-634309938(+)	Lipase	Os02g0767200	AT1G45201
	TraesCS6B02G363000	chr6B:634321918-634322503(+)	Pathogenesis-related protein PR-4	NA	AT3G04720
	TraesCS6B02G363100	chr6B:634330005-634330533(+)	Pathogenesis-related protein PR-4	NA	AT3G04720
	TraesCS6B02G363200	chr6B:634330858-634335883(-)	THO complex subunit 5	Os02g0767100	AT1G45233
	TraesCS6B02G363300	chr6B:634501638-634502222(+)	Ripening-related protein	NA	NA
	TraesCS6B02G363400	chr6B:634502882-634503969(-)	Signal peptidase I	NA	NA
	TraesCS6B02G363500	chr6B:634568594-634580495(+)	Neuroblastoma-amplified sequence	NA	NA
	TraesCS6B02G363600	chr6B:634611394-634616763(+)	Remorin	Os02g0767000	AT1G45207
	TraesCS6B02G363700	chr6B:634639596-634642685(+)	Mannan endo-1,4-beta-mannosidase 4	Os02g0766900	NA
	TraesCS6B02G363800	chr6B:634939897-634942944(+)	Mannan endo-1,4-beta-mannosidase 4	Os02g0766900	AT5G66460
	TraesCS6B02G363900	chr6B:634976669-634979612(+)	Mannan endo-1,4-beta-mannosidase 4	Os02g0766900	AT5G66460
	TraesCS6B02G364000	chr6B:635168431-635172842(+)	BZIP transcription factor	Os02g0766700	AT1G45249
	TraesCS6B02G364100	chr6B:635175281-635176620(-)	DUF1685 family protein	Os02g0766600	NA
	TraesCS6B02G364200	chr6B:635274725-635281114(-)	Ankyrin repeat family protein	NA	NA
	TraesCS6B02G364300	chr6B:636185525-636187768(+)	ATP-dependent RNA helicase	Os03g0708600	AT1G28180
	TraesCS6B02G364400	chr6B:636211913-636214217(+)	ATP-dependent RNA helicase	Os03g0708600	AT1G28180
	TraesCS6B02G364500	chr6B:636381721-636385272(+)	DNA-directed RNA polymerase subunit	Os02g0766000	AT1G45230
	TraesCS6B02G364600	chr6B:636392631-636397024(+)	Nitrite reductase	Os02g0765900	AT2G15620
qHA6B.3	TraesCS6B02G375300	chr6B:649826817-649827104(-)	B3 domain-containing protein	NA	NA
	TraesCS6B02G375400	chr6B:649831108-649834547(-)	Ethylene-responsive transcription factor	Os02g0782700	AT1G53910
	TraesCS6B02G375500	chr6B:649909920-649920739(+)	Protein TONSOKU	Os02g0784100	NA
	TraesCS6B02G375600	chr6B:650049285-650050939(-)	E3 ubiquitin-protein ligase	NA	NA
	TraesCS6B02G375700	chr6B:650596178-650600532(-)	E3 ubiquitin-protein ligase	NA	NA
	TraesCS6B02G375800	chr6B:650659437-650659887(+)	Membrane protein of er body-like protein	NA	NA
	TraesCS6B02G375900	chr6B:650803254-650805498(-)	Pectinesterase	Os02g0783000	AT1G53830
	TraesCS6B02G376000	chr6B:650922504-650924913(-)	Pectinesterase	Os02g0783000	AT1G53830
	TraesCS6B02G376100	chr6B:650925560-650928611(-)	Mitochondrial transcription termination factor	Os02g0783100	AT2G44020
	TraesCS6B02G376200	chr6B:651001107-651011374(+)	NA	Os02g0783700	AT4G33150
	TraesCS6B02G376300	chr6B:651019057-651021156(+)	Alpha-aminoadipic semialdehyde synthase	NA	NA
	TraesCS6B02G376400	chr6B:651407344-651415083(+)	Pyrophosphate-energized vacuolar membrane proton pump	Os02g0537900	AT1G16780
	TraesCS6B02G376500	chr6B:651415513-651420808(+)	26S protease regulatory subunit	Os02g0784700	AT1G53750
	TraesCS6B02G376600	chr6B:651419660-651420760(-)	Hexosyltransferase	Os02g0785000	AT5G57500
	TraesCS6B02G376700	chr6B:651422727-651424346(+)	Protein ETHYLENE INSENSITIVE 3	NA	NA
	TraesCS6B02G376800	chr6B:651987275-651988735(+)	60S ribosomal protein L35a-like protein	Os02g0785800	AT1G74270
	TraesCS6B02G376900	chr6B:651990737-651991503(+)	Histone H2B	Os01g0152700	AT3G46030
	TraesCS6B02G377000	chr6B:651994665-652003528(+)	Anaphase-promoting complex subunit 4	Os02g0785900	NA
	TraesCS6B02G377100	chr6B:652170603-652173030(+)	lysine ketoglutarate reductase trans-splicing-like protein, putative (DUF707)	NA	NA
	TraesCS6B02G377200	chr6B:652322048-652331630(-)	Quinoprotein amine dehydrogenase, beta chain-like RIC1-like guanyl-nucleotide exchange factor	Os02g0786000	AT3G61480
	TraesCS6B02G377300	chr6B:652521177-652522706(-)	F-box family protein	NA	NA
	TraesCS6B02G377400	chr6B:652628812-652631582(-)	MYB-related transcription factor	Os02g0786400	AT5G57620
	TraesCS6B02G377500	chr6B:652639677-652646196(-)	NA	Os02g0786200	AT5G57610
	TraesCS6B02G377600	chr6B:652697119-652697487(-)	2-nonaprenyl-3-methyl-6-methoxy-1,4-benzoquinol hydroxylase	NA	NA
	TraesCS6B02G377700	chr6B:652945270-652946131(+)	Pathogenesis-related protein 1	Os02g0786400	AT5G57625
	TraesCS6B02G377800	chr6B:652983633-652984166(+)	Pathogenesis-related protein 1	Os02g0786500	AT5G57625
	TraesCS6B02G377900	chr6B:653004667-653007330(+)	F-box family protein	NA	NA
	TraesCS6B02G378000	chr6B:653014981-653015923(+)	Pathogenesis-related protein 1-1	Os02g0786900	AT5G57625
	TraesCS6B02G378100	chr6B:653071737-653073713(+)	Carboxyl methyltransferase	NA	NA
	TraesCS6B02G378200	chr6B:653100497-653107495(+)	Telomeric repeat-binding factor 1	NA	NA
	TraesCS6B02G378300	chr6B:653107982-653110432(-)	transmembrane protein, putative (DUF594)	NA	NA
	TraesCS6B02G378400	chr6B:653193604-653194717(-)	Cysteine protease, putative	Os04g0207600	AT5G45890
	TraesCS6B02G378500	chr6B:653199107-653199605(-)	Transmembrane protein 14C	Os04g0577800	AT1G33265
	TraesCS6B02G378600	chr6B:653221446-653223255(+)	RING/U-box superfamily protein	Os02g0787500	AT4G32600
	TraesCS6B02G378700	chr6B:653697881-653698327(-)	Cysteine protease, putative	Os04g0206300	AT5G45890
	TraesCS6B02G378800	chr6B:653710312-653712691(-)	Ubiquitin carboxyl-terminal hydrolase 2	NA	NA
	TraesCS6B02G378900	chr6B:653714433-653715546(-)	Cysteine protease, putative	Os04g0207600	AT5G45890
	TraesCS6B02G379000	chr6B:653787576-653788676(-)	Cysteine protease, putative	Os04g0207600	AT5G45890
	TraesCS6B02G379100	chr6B:653850361-653853361(-)	transmembrane protein, putative (DUF594)	NA	NA
	TraesCS6B02G379200	chr6B:653855328-653856440(-)	Cysteine protease, putative	Os04g0207600	AT5G45890
	TraesCS6B02G379300	chr6B:653871436-653872547(-)	Cysteine protease, putative	Os04g0207600	AT5G45890
	TraesCS6B02G379400	chr6B:653882038-653885788(-)	RING/U-box superfamily protein	Os02g0787500	AT4G32600
	TraesCS6B02G379500	chr6B:654608355-654610058(+)	Protein kinase	Os02g0787300	AT3G21220
	TraesCS6B02G379600	chr6B:654732653-654735781(-)	Kinase	Os02g0787200	NA
	TraesCS6B02G379700	chr6B:654736001-654740177(-)	Alpha/beta-hydrolase superfamily protein	Os02g0787100	NA
	TraesCS6B02G379800	chr6B:654775115-654775965(+)	Pathogenesis-related protein 1	Os02g0787000	NA
	TraesCS6B02G379900	chr6B:654878858-654879304(+)	Cysteine protease, putative	Os04g0206300	AT5G45890
	TraesCS6B02G380000	chr6B:654917608-654918723(+)	Cysteine protease, putative	Os04g0207600	AT5G45890
	TraesCS6B02G380200	chr6B:655053470-655054583(+)	Cysteine protease, putative	Os04g0207600	AT5G45890
	TraesCS6B02G380300	chr6B:655061588-655064513(+)	Sugar transporter family protein, expressed	Os11g0643800	AT2G48020
	TraesCS6B02G380400	chr6B:655066540-655066827(-)	B3 domain-containing protein family	NA	NA
	TraesCS6B02G380500	chr6B:655250609-655251142(+)	2-oxoglutarate (2OG) and Fe(II)-dependent oxygenase superfamily protein	NA	NA
	TraesCS6B02G380600	chr6B:655275314-655276095(+)	NFX1-type zinc finger-containing protein 1	NA	NA
	TraesCS6B02G380700	chr6B:655278259-655278990(+)	S-locus lectin protein kinase family protein	NA	NA
	TraesCS6B02G380800	chr6B:655862884-655871010(+)	Glutamate receptor	Os02g0787600	NA
	TraesCS6B02G380900	chr6B:655888000-655892270(+)	Glutamate receptor	Os02g0787600	NA
	TraesCS6B02G381000	chr6B:656030166-656033682(-)	Protein FLX-like 1	NA	NA
	TraesCS6B02G381100	chr6B:656165033-656171069(+)	Cycloeucalenol cycloisomerase	NA	AT5G50375
	TraesCS6B02G381200	chr6B:656177304-656178798(-)	Exocyst complex component, putative	NA	NA
	TraesCS6B02G381300	chr6B:656273611-656281007(+)	NA	Os02g0787800	AT4G30340
	TraesCS6B02G381400	chr6B:656280977-656286246(-)	Glutamate receptor	Os02g0787600	NA
	TraesCS6B02G381500	chr6B:656484186-656486770(-)	NA	NA	NA
	TraesCS6B02G381600	chr6B:656509445-656512233(+)	Eukaryotic translation initiation factor 3 subunit G	Os02g0788400	AT3G11400
	TraesCS6B02G381700	chr6B:656512473-656514245(-)	NA	Os02g0788500	NA
	TraesCS6B02G381800	chr6B:656523246-656526665(-)	Chaperone protein clpB	Os02g0788600	NA
	TraesCS6B02G381900	chr6B:656542938-656566115(-)	Amino acid transporter family protein	Os02g0788800	AT2G41190
	TraesCS6B02G382000	chr6B:656996783-657001563(-)	NA	Os02g0788800	AT2G41190
	TraesCS6B02G382100	chr6B:657089245-657091238(+)	Equilibrative nucleoside transporter	Os08g0205200	AT1G70330
	TraesCS6B02G382200	chr6B:657092121-657092279(+)	Arginine--tRNA ligase	NA	NA
	TraesCS6B02G382300	chr6B:657263691-657268451(-)	Cyclic nucleotide-gated channel	Os02g0789100	AT4G30360
	TraesCS6B02G382400	chr6B:657283117-657287053(-)	TVP38/TMEM64 family membrane protein	Os03g0374400	AT2G02370
	TraesCS6B02G382500	chr6B:657619370-657645216(-)	Cyclic nucleotide-gated channel	Os02g0789100	AT4G30360
	TraesCS6B02G382600	chr6B:657650410-657654075(-)	Arginine/serine-rich splicing factor, putative	Os02g0789400	NA
	TraesCS6B02G382700	chr6B:657938200-657942532(+)	Cyclin family protein	Os09g0504400	AT5G48640
	TraesCS6B02G382800	chr6B:657943744-657947679(-)	RING/U-box superfamily protein	NA	NA
	TraesCS6B02G382900	chr6B:657983087-657983599(+)	DNA-directed RNA polymerase subunit beta	NA	NA
	TraesCS6B02G383000	chr6B:658119248-658120175(+)	Late embryogenesis abundant (LEA) hydroxyproline-rich glycoprotein family	NA	NA
	TraesCS6B02G383100	chr6B:658172183-658175200(+)	Protein CYPRO4	Os02g0789600	AT3G19240
	TraesCS6B02G383200	chr6B:658177094-658178907(+)	Dehydrin	NA	NA
	TraesCS6B02G383300	chr6B:658291240-658297903(+)	Protein DETOXIFICATION	Os07g0502200	AT3G23560
	TraesCS6B02G383400	chr6B:658366435-658366983(-)	DNA topoisomerase	NA	NA
	TraesCS6B02G383500	chr6B:658402976-658404180(+)	NA	NA	NA
	TraesCS6B02G383600	chr6B:658530539-658531483(+)	Dehydrin	NA	NA
	TraesCS6B02G383700	chr6B:658550107-658553823(+)	Pectinesterase	Os02g0783000	NA
	TraesCS6B02G383800	chr6B:658577562-658578499(-)	Dehydrin	NA	NA
	TraesCS6B02G383900	chr6B:658581453-658584098(+)	Leucine-rich repeat receptor-like protein kinase family protein	Os10g0375000	NA
	TraesCS6B02G384000	chr6B:658610590-658622188(+)	Protein kinase, putative	Os02g0777400	NA
	TraesCS6B02G384200	chr6B:658663580-658667689(+)	Leucine-rich repeat receptor-like protein kinase family protein	NA	NA
	TraesCS6B02G384300	chr6B:658710337-658714564(+)	Leucine-rich repeat receptor-like protein kinase family protein	NA	NA
	TraesCS6B02G384500	chr6B:659232852-659237118(-)	Trehalose-6-phosphate synthase	Os02g0790500	AT2G18700
	TraesCS6B02G384600	chr6B:659589140-659589541(+)	Stigma-specific protein Stig1	NA	NA
	TraesCS6B02G384700	chr6B:659612324-659617048(+)	Sugar transporter, putative	Os03g0218400	AT5G26340
	TraesCS6B02G384800	chr6B:659624250-659638925(-)	heat-inducible transcription repressor (DUF639)	NA	NA
	TraesCS6B02G384900	chr6B:659639554-659649179(-)	Protein RFT1-like protein	Os07g0486100	AT5G07630
	TraesCS6B02G385000	chr6B:659808857-659810173(+)	Protein pelota homolog	NA	AT4G27650
	TraesCS6B02G385100	chr6B:659934623-659936852(-)	RING finger protein	Os02g0790600	AT4G30400
	TraesCS6B02G385200	chr6B:660218201-660221085(+)	Ankyrin repeat-containing protein, putative	Os02g0791200	AT5G57740
	TraesCS6B02G385300	chr6B:660251962-660252312(-)	arginine N-methyltransferase, putative (DUF688)	NA	NA
	TraesCS6B02G385400	chr6B:660254392-660255159(-)	Kinase, putative	Os02g0777400	AT4G30520
	TraesCS6B02G385500	chr6B:660258402-660260423(+)	Lectin receptor kinase	Os02g0777400	AT4G30520
	TraesCS6B02G385600	chr6B:660267290-660269323(+)	Lectin receptor kinase	Os02g0777400	AT4G30520
	TraesCS6B02G385700	chr6B:660436767-660437315(-)	DNA topoisomerase	NA	NA
	TraesCS6B02G385800	chr6B:660455615-660456503(+)	BHLH transcription factor	Os02g0791300	AT4G30410
	TraesCS6B02G385900	chr6B:660562784-660564508(-)	UDP-glucuronate 4-epimerase 4	Os02g0791500	AT4G30440
	TraesCS6B02G386000	chr6B:660643019-660646455(+)	F-box protein	NA	NA
	TraesCS6B02G386100	chr6B:660664103-660676384(+)	Kinase	Os02g0791700	AT4G30960
	TraesCS6B02G386200	chr6B:660676250-660680341(-)	Autophagy-related protein 18	Os02g0791800	AT4G30510
	TraesCS6B02G386300	chr6B:661052615-661052878(+)	SsrA-binding protein	NA	NA
	TraesCS6B02G386400	chr6B:661338207-661340313(+)	Pheophorbide a oxygenase, chloroplastic	Os02g0792800	AT2G24820
	TraesCS6B02G386500	chr6B:661340337-661343700(-)	Serine incorporator	Os02g0792900	AT1G16180
	TraesCS6B02G386600	chr6B:661463674-661467425(-)	Zinc finger CCCH-type with G patch domain protein	Os02g0793000	NA
	TraesCS6B02G386700	chr6B:661520374-661522332(+)	Cytochrome b-c1 complex subunit 8	Os06g0175900	AT3G10860
	TraesCS6B02G386800	chr6B:661539282-661540506(+)	Structural maintenance of chromosomes protein	NA	NA
	TraesCS6B02G386900	chr6B:661841169-661842443(+)	Mediator of RNA polymerase II transcription subunit 23	NA	NA
	TraesCS6B02G387000	chr6B:661851160-661859891(+)	Isopentenyl-diphosphate delta-isomerase	Os02g0793300	AT1G79690
	TraesCS6B02G387100	chr6B:661862347-661863140(-)	Protease inhibitor/seed storage/lipid transfer protein family protein	NA	AT4G30880
	TraesCS6B02G387200	chr6B:662028638-662032091(-)	Disease resistance protein (NBS-LRR class) family	NA	NA
	TraesCS6B02G387300	chr6B:662090891-662107314(-)	Vacuolar protein-sorting protein 33	Os04g0223000	AT3G54860
	TraesCS6B02G387400	chr6B:662256760-662268336(-)	Clustered mitochondria protein	NA	NA
	TraesCS6B02G387500	chr6B:662451815-662452631(+)	Membrane steroid-binding protein	Os02g0793700	AT2G24940
	TraesCS6B02G387600	chr6B:662500617-662505477(-)	Embryogenesis transmembrane protein-like	NA	NA
	TraesCS6B02G387700	chr6B:662510516-662513582(+)	ATP-dependent DNA helicase	Os02g0793800	AT4G30780
	TraesCS6B02G387800	chr6B:662513699-662517799(-)	Snf1-related kinase interactor 1, putative	Os02g0793900	NA
	TraesCS6B02G387900	chr6B:662560290-662563919(-)	RING/U-box superfamily protein	Os02g0794000	NA
	TraesCS6B02G388000	chr6B:662886039-662893827(+)	QWRF motif protein (DUF566)	Os02g0794300	AT4G30710
	TraesCS6B02G388100	chr6B:662894403-662899450(-)	Translation initiation factor IF-3	Os02g0794400	AT4G30690
	TraesCS6B02G388200	chr6B:663664791-663676654(+)	Myosin heavy chain-like protein, putative	NA	NA
	TraesCS6B02G388300	chr6B:663683530-663684739(+)	Cytosolic Fe-S cluster assembly factor NBP35	NA	NA
	TraesCS6B02G388400	chr6B:663691006-663692885(-)	NA	NA	NA
	TraesCS6B02G388500	chr6B:663800085-663800805(+)	Cytochrome c oxidase copper chaperone	Os02g0794600	AT1G53030
	TraesCS6B02G388600	chr6B:663840537-663846052(-)	Carboxypeptidase	Os02g0794500	AT4G30610
	TraesCS6B02G388700	chr6B:663985164-663987054(+)	Anthocyanin 5-aromatic acyltransferase-like protein	Os07g0414000	NA
	TraesCS6B02G388800	chr6B:664021498-664027063(-)	Disease resistance protein (NBS-LRR class) family	NA	NA
	TraesCS6B02G388900	chr6B:664062456-664064312(-)	NBS-LRR disease resistance protein, putative	NA	NA
	TraesCS6B02G389000	chr6B:664064459-664070409(-)	Disease resistance protein (NBS-LRR class) family	NA	NA
	TraesCS6B02G389100	chr6B:664194466-664198139(+)	Purple acid phosphatase	Os12g0637200	AT2G16430
	TraesCS6B02G389200	chr6B:664216984-664221032(-)	Leucine aminopeptidase, putative	Os02g0794700	AT4G30920
	TraesCS6B02G389300	chr6B:664222179-664232873(-)	Formin-like protein	Os02g0794900	AT3G32400
	TraesCS6B02G389400	chr6B:664256175-664267824(+)	C2 domain-containing protein / GRAM domain-containing protein	Os09g0516900	AT3G59660
	TraesCS6B02G389500	chr6B:664289970-664296128(+)	Ubiquitin carboxyl-terminal hydrolase, putative	Os02g0795000	AT4G30890
	TraesCS6B02G389600	chr6B:664304312-664305152(-)	F-box family protein	NA	NA
	TraesCS6B02G389700	chr6B:664381531-664382969(-)	Replication protein A 32 kDa subunit-like protein	NA	AT2G24490
	TraesCS6B02G389800	chr6B:664392840-664394216(-)	mitogen-activated protein kinase 1	NA	NA
	TraesCS6B02G389900	chr6B:664405646-664406953(-)	F-box family protein	NA	NA
	TraesCS6B02G390000	chr6B:664477679-664480588(+)	carboxyl-terminal peptidase, putative (DUF239)	Os02g0792500	NA
	TraesCS6B02G390100	chr6B:664500180-664501715(+)	NA	Os02g0795200	AT4G31805
	TraesCS6B02G390200	chr6B:664520380-664521961(+)	Protein POLAR LOCALIZATION DURING ASYMMETRIC DIVISION AND REDISTRIBUTION	Os02g0795200	AT4G31805
	TraesCS6B02G390300	chr6B:664522166-664524779(-)	carboxyl-terminal peptidase, putative (DUF239)	Os02g0792500	NA
	TraesCS6B02G390400	chr6B:664686214-664686744(+)	B3 domain-containing protein	NA	NA
	TraesCS6B02G390500	chr6B:664821900-664827018(-)	carboxyl-terminal peptidase (DUF239)	Os02g0792500	NA
	TraesCS6B02G390600	chr6B:664834310-664836633(+)	Photosystem II 10 kDa polypeptide	Os08g0200300	AT1G79040
	TraesCS6B02G390700	chr6B:665035093-665037764(-)	FBD-associated F-box protein	Os02g0793500	NA
	TraesCS6B02G390800	chr6B:665130463-665133221(-)	F-box family protein	Os02g0793500	NA
	TraesCS6B02G390900	chr6B:665160376-665163026(-)	FBD-associated F-box protein	Os02g0793500	NA
	TraesCS6B02G391000	chr6B:665415774-665418450(-)	F-box/RNI-like/FBD-like domains-containing protein	Os02g0793500	NA
	TraesCS6B02G391100	chr6B:665507900-665511646(+)	Basic helix-loop-helix transcription factor	Os02g0795800	AT4G30980
	TraesCS6B02G391200	chr6B:665512071-665516262(-)	ATP-dependent RNA helicase DeaD	Os02g0795900	AT4G15850
	TraesCS6B02G391300	chr6B:665524034-665526675(+)	Pentatricopeptide repeat-containing protein	Os02g0796400	AT4G31850
	TraesCS6B02G391400	chr6B:665715750-665716619(-)	CCR4-NOT transcription complex family protein	Os02g0796300	AT2G32070
	TraesCS6B02G391500	chr6B:665736518-665740464(-)	T-complex protein 1 subunit delta	Os02g0332200	AT3G18190
	TraesCS6B02G391600	chr6B:666275177-666275914(+)	AGAMOUS-like MADS-box protein	NA	NA
	TraesCS6B02G391700	chr6B:666307302-666308039(+)	AGAMOUS-like MADS-box protein	NA	NA
qHA6D.1	TraesCS6D02G330200	chr6D:433641519-433642274(+)	Flavin-binding monooxygenase family protein	NA	NA
	TraesCS6D02G330300	chr6D:433645630-433646507(+)	Translation initiation factor IF-2	NA	NA
	TraesCS6D02G330400	chr6D:433696030-433696812(-)	NFX1-type zinc finger-containing protein 1	NA	NA
	TraesCS6D02G330500	chr6D:433708698-433715343(-)	Glutamate receptor	Os02g0787600	NA
	TraesCS6D02G330600	chr6D:433765233-433768001(-)	Protein FLX-like 1	Os04g0479100	NA
	TraesCS6D02G330700	chr6D:433897058-433902710(+)	Cycloeucalenol cycloisomerase	NA	AT5G50375
	TraesCS6D02G330800	chr6D:433929693-433936738(+)	Diacylglycerol kinase	Os02g0787800	AT2G18730
	TraesCS6D02G330900	chr6D:433936980-433942791(-)	Glutamate receptor	Os02g0787600	NA
	TraesCS6D02G331000	chr6D:434017477-434020605(+)	Eukaryotic translation initiation factor 3 subunit G	Os02g0788400	AT3G11400
	TraesCS6D02G331100	chr6D:434020787-434022596(-)	F-box protein SKIP8	Os02g0788500	NA
	TraesCS6D02G331200	chr6D:434140386-434143779(-)	Chaperone protein clpB	Os02g0788600	NA
	TraesCS6D02G331300	chr6D:434169366-434173088(-)	Amino acid transporter family protein	Os02g0788800	AT2G41190
	TraesCS6D02G331400	chr6D:434252973-434257762(-)	NA	Os02g0788800	AT2G41190
	TraesCS6D02G331500	chr6D:434402729-434407455(+)	Lysine--tRNA ligase	NA	NA
	TraesCS6D02G331600	chr6D:434440915-434442870(+)	NA	Os08g0205200	AT1G70330
	TraesCS6D02G331700	chr6D:434450430-434454809(-)	Cyclic nucleotide-gated channel	Os02g0789100	AT4G30360
	TraesCS6D02G331800	chr6D:434460014-434464075(-)	TVP38/TMEM64 family membrane protein	Os03g0374400	AT2G02370
	TraesCS6D02G331900	chr6D:434467990-434478494(-)	Cyclic nucleotide-gated channel	Os02g0789100	AT4G30360
	TraesCS6D02G332000	chr6D:434482186-434485928(-)	Arginine/serine-rich splicing factor, putative	Os02g0789400	NA
	TraesCS6D02G332100	chr6D:434507902-434512189(+)	Cyclin family protein	Os09g0504400	AT5G48640
	TraesCS6D02G332200	chr6D:434512436-434516017(-)	RING/U-box superfamily protein	NA	NA
	TraesCS6D02G332300	chr6D:434604263-434605238(+)	Late embryogenesis abundant (LEA) hydroxyproline-rich glycoprotein family	NA	NA
	TraesCS6D02G332400	chr6D:434786695-434789883(+)	Protein CYPRO4	Os02g0789600	AT3G19240
	TraesCS6D02G332500	chr6D:434811674-434812738(+)	Dehydrin	NA	NA
	TraesCS6D02G332600	chr6D:435012400-435012681(+)	Dehydrin	NA	NA
	TraesCS6D02G332700	chr6D:435072895-435075633(+)	Dehydrin	NA	NA
	TraesCS6D02G332800	chr6D:435300309-435308407(+)	Protein DETOXIFICATION	Os07g0502200	AT3G23560
	TraesCS6D02G332900	chr6D:435351033-435352218(+)	NA	NA	NA
	TraesCS6D02G333000	chr6D:435711668-435712623(+)	Dehydrin	NA	NA
	TraesCS6D02G333100	chr6D:435749803-435750719(+)	Dehydrin	NA	NA
	TraesCS6D02G333200	chr6D:435763700-435764598(+)	Dehydrin	NA	NA
	TraesCS6D02G333300	chr6D:435831506-435832386(-)	Dehydrin	NA	NA
	TraesCS6D02G333400	chr6D:435905243-435907228(-)	F-box protein family	NA	NA
	TraesCS6D02G333500	chr6D:435944107-435948027(+)	Pectinesterase	Os02g0783000	NA
	TraesCS6D02G333600	chr6D:435962275-435963310(-)	Dehydrin	NA	NA
	TraesCS6D02G333700	chr6D:435970617-435973895(+)	Receptor-kinase, putative	Os02g0777400	NA
	TraesCS6D02G333800	chr6D:436073808-436077481(+)	Leucine-rich repeat receptor-like protein kinase family protein	NA	NA
	TraesCS6D02G333900	chr6D:436090919-436095234(+)	Leucine-rich repeat receptor-like protein kinase family protein	NA	NA
	TraesCS6D02G334000	chr6D:436221659-436225654(-)	NA	Os02g0790500	AT2G18700
	TraesCS6D02G334100	chr6D:436344553-436344888(+)	Stigma-specific Stig1 family protein	NA	NA
	TraesCS6D02G334200	chr6D:436373616-436374452(+)	Jojoba acyl CoA reductase-related male sterility protein	NA	NA
	TraesCS6D02G334300	chr6D:436421023-436422430(+)	Protein pelota homolog	NA	AT4G27650
	TraesCS6D02G334400	chr6D:436456926-436466320(-)	NA	Os07g0486100	NA
	TraesCS6D02G334500	chr6D:436473875-436474177(-)	Protein pelota homolog	Os04g0659900	AT4G27650
	TraesCS6D02G334600	chr6D:436493931-436496546(+)	NA	NA	NA
	TraesCS6D02G334700	chr6D:436543788-436544897(-)	Serine/threonine protein phosphatase 7 long form isogeny	NA	NA
	TraesCS6D02G334800	chr6D:436638172-436639652(+)	Protein pelota homolog	NA	AT4G27650
	TraesCS6D02G334900	chr6D:436715643-436716974(-)	RING finger protein	Os02g0790600	AT4G30400
	TraesCS6D02G335000	chr6D:436733171-436737059(+)	NA	Os02g0791200	AT5G57740
	TraesCS6D02G335100	chr6D:436757730-436758317(+)	U4/U6.U5 small nuclear ribonucleoprotein 27 kDa protein	NA	NA
	TraesCS6D02G335200	chr6D:436762608-436762952(-)	arginine N-methyltransferase, putative (DUF688)	NA	NA
	TraesCS6D02G335300	chr6D:436764829-436766844(-)	Lectin receptor kinase	Os02g0777400	AT4G30520
	TraesCS6D02G335400	chr6D:436770030-436772078(+)	Lectin receptor kinase	Os02g0777400	AT4G30520
	TraesCS6D02G335500	chr6D:436798615-436799504(+)	BHLH transcription factor	Os02g0791300	AT4G30410
	TraesCS6D02G335600	chr6D:436832068-436834195(+)	UDP-glucuronate 4-epimerase 4	Os02g0791500	AT4G30440
	TraesCS6D02G335700	chr6D:436860476-436863325(+)	F-box protein	NA	NA
	TraesCS6D02G335800	chr6D:436870500-436887069(+)	Kinase	Os02g0791700	AT4G30960
	TraesCS6D02G335900	chr6D:436887329-436890971(-)	Autophagy-related protein 18	Os02g0791800	AT4G30510
	TraesCS6D02G336000	chr6D:437163550-437165751(+)	Pheophorbide a oxygenase, chloroplastic	Os02g0792800	AT2G24820
	TraesCS6D02G336100	chr6D:437165832-437169311(-)	NA	Os02g0792900	AT1G16180
	TraesCS6D02G336200	chr6D:437176213-437180104(-)	Zinc finger CCCH-type with G patch domain protein	Os02g0793000	NA
	TraesCS6D02G336300	chr6D:437197901-437198869(+)	F-box SKIP23-like protein (DUF295)	NA	NA
	TraesCS6D02G336400	chr6D:437281195-437290533(+)	NA	Os02g0793300	AT1G79690
	TraesCS6D02G336500	chr6D:437324480-437341505(-)	Vacuolar protein-sorting protein 33	Os04g0223000	AT3G54860
	TraesCS6D02G336600	chr6D:437402279-437413487(+)	D-lactate dehydrogenase, putative	Os07g0163000	AT5G06580
	TraesCS6D02G336700	chr6D:437426104-437427489(-)	Tetratricopeptide repeat (TPR)-like superfamily protein	NA	NA
	TraesCS6D02G336800	chr6D:437676518-437686848(-)	Clustered mitochondria protein	NA	NA
	TraesCS6D02G336900	chr6D:437772775-437773816(+)	Membrane steroid-binding protein	Os02g0793700	AT2G24940
	TraesCS6D02G337000	chr6D:437781709-437786900(-)	Embryogenesis transmembrane protein-like	Os12g0141000	NA
	TraesCS6D02G337100	chr6D:437803062-437806250(+)	NA	Os02g0793800	AT4G30780
	TraesCS6D02G337200	chr6D:437806754-437810667(-)	Snf1-related kinase interactor 1, putative	Os02g0793900	NA
	TraesCS6D02G337300	chr6D:437814435-437817957(-)	RING/U-box superfamily protein	Os02g0794000	NA
	TraesCS6D02G337400	chr6D:437944539-437951327(+)	QWRF motif protein (DUF566)	Os02g0794300	AT4G30710
	TraesCS6D02G337500	chr6D:437952535-437957312(-)	Translation initiation factor IF-3	Os02g0794400	AT4G30690
	TraesCS6D02G337600	chr6D:437957948-437959948(+)	CsAtPR5	NA	NA
	TraesCS6D02G337700	chr6D:438274335-438286317(+)	Myosin heavy chain-like protein, putative	NA	NA
	TraesCS6D02G337800	chr6D:438298955-438300857(-)	WEB family protein, chloroplastic	NA	NA
	TraesCS6D02G337900	chr6D:438304237-438310273(-)	Protein phosphatase 2C	Os02g0799000	NA
	TraesCS6D02G338000	chr6D:438344877-438345920(+)	Phosphoribosylformylglycinamidine cyclo-ligase	NA	NA
	TraesCS6D02G338100	chr6D:438443404-438444546(-)	Extracellular matrix-binding protein ebh	NA	NA
	TraesCS6D02G338200	chr6D:438456804-438457900(+)	F-box family protein	Os02g0793500	NA
	TraesCS6D02G338300	chr6D:438457948-438458509(+)	F-box/FBD-like domains containing protein	NA	NA
	TraesCS6D02G338400	chr6D:438460817-438461083(+)	Cytochrome c oxidase copper chaperone	Os02g0794600	AT1G53030
	TraesCS6D02G338500	chr6D:438528073-438528827(-)	40S ribosomal protein	Os01g0250600	AT1G57540
	TraesCS6D02G338600	chr6D:438805104-438805334(+)	Cytochrome c oxidase copper chaperone	Os02g0794600	AT1G53030
	TraesCS6D02G338700	chr6D:438805622-438810991(-)	Carboxypeptidase	Os02g0794500	AT4G30610
	TraesCS6D02G338800	chr6D:438829879-438831604(+)	Anthocyanin 5-aromatic acyltransferase-like protein	Os07g0414000	NA
	TraesCS6D02G338900	chr6D:438836102-438839565(-)	Disease resistance protein (NBS-LRR class) family	NA	NA
	TraesCS6D02G339000	chr6D:438861293-438861658(-)	RNA polymerase Rpb7-like, N-terminal domain	NA	NA
	TraesCS6D02G339100	chr6D:438883083-438885643(+)	Purple acid phosphatase	Os12g0637200	AT2G16430
	TraesCS6D02G339200	chr6D:438891058-438895242(-)	Leucine aminopeptidase, putative	Os02g0794700	AT2G24200
	TraesCS6D02G339300	chr6D:438896104-438908215(-)	Formin-like protein	Os02g0794900	AT3G32400
	TraesCS6D02G339400	chr6D:438913083-438924112(+)	C2 domain-containing protein / GRAM domain-containing protein	Os09g0516900	AT3G59660
	TraesCS6D02G339500	chr6D:438929255-438935176(+)	Ubiquitin carboxyl-terminal hydrolase, putative	Os02g0795000	AT4G30890
	TraesCS6D02G339600	chr6D:438942402-438946634(-)	70 kDa heat shock protein	Os02g0815900	AT4G30520
	TraesCS6D02G339700	chr6D:438965041-438967274(-)	70 kDa heat shock protein	NA	AT3G12580
	TraesCS6D02G339800	chr6D:438971020-438974027(+)	NA	NA	NA
	TraesCS6D02G339900	chr6D:439509534-439510826(-)	F-box family protein	NA	NA
	TraesCS6D02G340000	chr6D:439600031-439601068(-)	F-box domain containing protein	NA	NA
	TraesCS6D02G340100	chr6D:439613349-439614359(-)	F-box family protein	NA	NA
	TraesCS6D02G340200	chr6D:439616425-439619143(+)	carboxyl-terminal peptidase, putative (DUF239)	Os02g0792500	NA
	TraesCS6D02G340300	chr6D:439619128-439620879(-)	Protein POLAR LOCALIZATION DURING ASYMMETRIC DIVISION AND REDISTRIBUTION	Os02g0795200	AT4G31805
	TraesCS6D02G340400	chr6D:439655415-439657078(+)	Protein POLAR LOCALIZATION DURING ASYMMETRIC DIVISION AND REDISTRIBUTION	Os02g0795200	AT4G31805
	TraesCS6D02G340500	chr6D:439659401-439662136(-)	carboxyl-terminal peptidase, putative (DUF239)	Os02g0792500	NA
	TraesCS6D02G340600	chr6D:439795718-439798289(-)	carboxyl-terminal peptidase, putative (DUF239)	Os02g0792500	NA
	TraesCS6D02G340700	chr6D:439805570-439808861(+)	Photosystem II 10 kDa polypeptide	Os08g0200300	AT1G79040
	TraesCS6D02G340800	chr6D:439920117-439923036(-)	FBD-associated F-box protein	Os02g0793500	NA
	TraesCS6D02G340900	chr6D:440013443-440015528(-)	FBD-associated F-box protein	Os02g0793500	NA
	TraesCS6D02G341000	chr6D:440208812-440211336(-)	F-box/RNI-like/FBD-like domains-containing protein	Os02g0793500	NA
	TraesCS6D02G341100	chr6D:440219247-440221225(-)	F-box/FBD-like domains containing protein	Os02g0793500	NA
	TraesCS6D02G341200	chr6D:440363517-440367371(+)	Basic helix-loop-helix transcription factor	Os02g0795800	AT4G30980
	TraesCS6D02G341300	chr6D:440367778-440371775(-)	ATP-dependent RNA helicase DeaD	Os02g0795900	AT4G15850
	TraesCS6D02G341400	chr6D:440381263-440384005(+)	Pentatricopeptide repeat-containing protein	Os02g0796400	AT4G31850
	TraesCS6D02G341500	chr6D:440657108-440664394(-)	CCR4-NOT transcription complex family protein	Os02g0796300	AT2G32070
	TraesCS6D02G341600	chr6D:440673614-440675169(+)	Glutamate dehydrogenase	NA	NA
	TraesCS6D02G341700	chr6D:441291375-441292100(+)	AGAMOUS-like MADS-box protein	NA	NA
	TraesCS6D02G341800	chr6D:441316863-441318410(+)	AGAMOUS-like MADS-box protein	NA	NA
	TraesCS6D02G341900	chr6D:441318455-441320111(+)	Cortactin-binding protein 2	NA	NA
	TraesCS6D02G342000	chr6D:441397725-441398450(+)	AGAMOUS-like MADS-box protein	NA	NA
	TraesCS6D02G342100	chr6D:441525814-441526599(+)	MADS-box transcription factor family protein	NA	NA
qHA7A.1	TraesCS7A02G270100	chr7A:276184672-276186447(-)	Heat shock transcription factor	Os08g0546800	AT5G62020
	TraesCS7A02G270200	chr7A:277445139-277448137(-)	Glucosamine-6-phosphate deaminase	Os08g0547100	AT5G24400
	TraesCS7A02G270300	chr7A:277730059-277733339(-)	RNA-binding family protein	Os08g0547000	NA
	TraesCS7A02G270400	chr7A:278413422-278413532(+)	Photosystem II reaction center protein I	CAA34011	ATCG00080
	TraesCS7A02G270500	chr7A:278452872-278455684(+)	NC domain-containing protein	Os08g0546900	AT1G01225
	TraesCS7A02G270600	chr7A:279179026-279184779(+)	GTPase-activating protein GYP7	Os08g0547200	NA
	TraesCS7A02G270700	chr7A:280069708-280071946(-)	Cytochrome P450	Os08g0547300	AT3G61880
	TraesCS7A02G270800	chr7A:281373215-281380368(-)	NA	Os08g0547500	AT5G66310
	TraesCS7A02G270900	chr7A:282368205-282369933(-)	Protein SHI RELATED SEQUENCE 1	Os08g0547600	AT5G66350
	TraesCS7A02G271100	chr7A:284111494-284112754(-)	alpha/beta-Hydrolases superfamily protein	Os08g0547800	AT5G62180
	TraesCS7A02G271200	chr7A:284526327-284528514(+)	Cytochrome P450 family protein	Os08g0547900	NA
	TraesCS7A02G271300	chr7A:284723615-284724783(-)	weak chloroplast movement under blue light protein (DUF827)	NA	NA
	TraesCS7A02G271400	chr7A:284726901-284730845(+)	NA	Os08g0548200	AT4G38790
	TraesCS7A02G271500	chr7A:284759088-284762032(+)	RING/U-box superfamily protein	Os08g0548300	AT5G66070
	TraesCS7A02G271600	chr7A:284786401-284787136(+)	Chaperone protein dnaJ	Os08g0548400	AT4G36040
	TraesCS7A02G271700	chr7A:285056491-285059168(+)	Armadillo repeat only	Os08g0548500	AT5G66200
	TraesCS7A02G271800	chr7A:285170768-285172863(+)	Pathogenesis-related thaumatin-like protein	Os09g0536400	AT4G36000
	TraesCS7A02G271900	chr7A:285425133-285426412(+)	F-box protein	NA	NA
	TraesCS7A02G272000	chr7A:285430070-285434824(+)	Proteasome subunit alpha type	Os08g0548900	AT5G66140
	TraesCS7A02G272100	chr7A:285575609-285576769(-)	MYB transcription factor	Os02g0189566	AT4G38620
	TraesCS7A02G272200	chr7A:285606538-285610331(-)	Peroxidase family protein	Os08g0549100	AT4G35970
	TraesCS7A02G272300	chr7A:285690232-285690813(-)	Coatomer, beta' subunit	NA	NA
	TraesCS7A02G272400	chr7A:285692246-285696766(+)	NA	Os08g0549200	AT4G38590
	TraesCS7A02G272500	chr7A:285792216-285794673(-)	Acyl carrier protein	Os08g0549300	NA
	TraesCS7A02G272600	chr7A:286031798-286032493(+)	Eyes absent homolog 2	Os08g0549900	NA
	TraesCS7A02G272700	chr7A:286149044-286149842(+)	S-adenosyl-L-methionine-dependent methyltransferases superfamily protein	NA	NA
	TraesCS7A02G272800	chr7A:286223283-286225703(-)	Protein DETOXIFICATION	Os08g0550200	AT1G47530
	TraesCS7A02G272900	chr7A:286529318-286538026(-)	50S ribosomal protein L23	Os07g0415200	NA
	TraesCS7A02G273000	chr7A:286818014-286819605(-)	RING/U-box superfamily protein	Os08g0550400	AT5G66070
	TraesCS7A02G273100	chr7A:286985268-286990971(-)	NA	NA	NA
	TraesCS7A02G273200	chr7A:286995241-287002651(+)	Cytochrome P450	Os08g0547900	NA
	TraesCS7A02G273300	chr7A:287212011-287212706(-)	SAUR auxin-responsive family protein	Os08g0550700	AT1G76190
	TraesCS7A02G273400	chr7A:287214658-287215352(-)	SAUR auxin-responsive family protein	Os08g0550700	AT1G76190
	TraesCS7A02G273500	chr7A:287216873-287217662(-)	General control non-repressible 5 isoform 1	NA	NA
	TraesCS7A02G273600	chr7A:287238207-287243420(+)	DUF630 family protein, putative (DUF630 and DUF632)	Os08g0551200	NA
	TraesCS7A02G273700	chr7A:287253784-287254500(-)	DUF241 domain protein	Os08g0553500	NA
	TraesCS7A02G273800	chr7A:287472715-287473723(+)	Tumor necrosis factor	Os08g0551366	NA
	TraesCS7A02G273900	chr7A:287482908-287483447(+)	selection/upkeep of intraepithelial T-cells protein, putative (DUF241)	Os08g0551366	NA
	TraesCS7A02G274000	chr7A:287484947-287485826(+)	DUF241 domain protein, putative (DUF241)	Os08g0551366	AT1G76210
	TraesCS7A02G274100	chr7A:287492083-287493067(+)	DUF241 domain protein, putative (DUF241)	Os08g0551366	NA
	TraesCS7A02G274200	chr7A:287499669-287500595(+)	DUF241 domain protein, putative (DUF241)	Os08g0551366	AT1G76210
	TraesCS7A02G274300	chr7A:287521610-287522354(+)	DUF241 domain protein, putative (DUF241)	Os08g0551366	AT1G76220
	TraesCS7A02G274400	chr7A:287526362-287527383(+)	DUF241 domain protein, putative (DUF241)	Os08g0551366	AT1G76210
	TraesCS7A02G274500	chr7A:287550805-287551770(+)	DUF241 domain protein, putative (DUF241)	Os08g0552300	AT1G76210
	TraesCS7A02G274600	chr7A:287552184-287553136(+)	DUF241 domain protein, putative (DUF241)	Os08g0553400	AT1G76210
	TraesCS7A02G274700	chr7A:287613013-287614188(+)	Myb/SANT-like DNA-binding domain protein	NA	NA
	TraesCS7A02G274800	chr7A:287638275-287638763(-)	RING/U-box superfamily protein	Os06g0301000	AT1G65040
	TraesCS7A02G274900	chr7A:287663385-287664685(-)	high mobility group B1	NA	NA
	TraesCS7A02G275000	chr7A:287805185-287806141(+)	DUF241 domain protein, putative (DUF241)	Os08g0553400	AT1G76220
	TraesCS7A02G275100	chr7A:287819846-287823537(+)	DUF241 domain protein, putative (DUF241)	Os08g0553400	NA
	TraesCS7A02G275200	chr7A:287848811-287849257(+)	DUF241 domain protein, putative (DUF241)	Os08g0553000	NA
	TraesCS7A02G275300	chr7A:287861789-287862227(+)	Quinolinate synthase A	Os08g0553500	NA
	TraesCS7A02G275400	chr7A:287862823-287863152(-)	ARM repeat superfamily protein	Os08g0552200	NA
	TraesCS7A02G275500	chr7A:287889007-287889321(+)	Surfeit locus protein 1	Os08g0553050	NA
	TraesCS7A02G275600	chr7A:287890090-287890404(+)	Transducin/WD40 repeat-like superfamily protein	Os08g0553000	NA
	TraesCS7A02G275700	chr7A:287890455-287890784(-)	S-adenosyl-L-methionine-dependent methyltransferases superfamily protein	Os08g0552200	NA
	TraesCS7A02G275800	chr7A:288061434-288061718(-)	Glucosidase 2 subunit alpha	Os08g0552200	NA
	TraesCS7A02G275900	chr7A:288063417-288064589(+)	DUF241 domain protein, putative (DUF241)	Os08g0553700	AT1G76210
	TraesCS7A02G276000	chr7A:288065091-288068767(-)	Vestitone reductase-related family protein	Os08g0553800	AT4G35250
qHA7B.2	TraesCS7B02G346000	chr7B:602075087-602082417(-)	Mitochondrial intermediate peptidase	Os06g0686500	AT5G51540
	TraesCS7B02G346100	chr7B:602087939-602092341(+)	Transducin/WD40 repeat protein	Os07g0252000	AT2G26060
	TraesCS7B02G346200	chr7B:602093316-602098216(+)	Transducin/WD40 repeat protein	Os07g0252000	AT2G26060
	TraesCS7B02G346300	chr7B:602111303-602112246(-)	weak chloroplast movement under blue light protein (DUF827)	NA	NA
	TraesCS7B02G346400	chr7B:602142869-602143417(+)	GRF zinc finger / Zinc knuckle protein	NA	NA
	TraesCS7B02G346500	chr7B:602302440-602302636(-)	Lipid transfer protein	Os06g0686400	NA
	TraesCS7B02G346600	chr7B:602306060-602310811(-)	Protein SCO1-like protein, mitochondrial	NA	AT3G08950
	TraesCS7B02G346700	chr7B:602937797-602941577(+)	Auxin response factor	Os06g0685700	AT4G30080
	TraesCS7B02G347000	chr7B:603585437-603596838(-)	NA	Os06g0685300	AT1G20080
	TraesCS7B02G347100	chr7B:603657172-603657958(+)	Heat-shock protein, putative	Os01g0184100	AT5G12020
	TraesCS7B02G347200	chr7B:603663599-603664123(+)	CheY-like two-component responsive regulator family protein	NA	NA
	TraesCS7B02G347300	chr7B:603667518-603669794(-)	30S ribosomal protein S6	NA	NA
	TraesCS7B02G347400	chr7B:603746493-603747380(+)	Dynein assembly factor 3, axonemal	NA	NA
	TraesCS7B02G347500	chr7B:603840059-603840346(+)	B3 domain-containing protein family	NA	NA
	TraesCS7B02G347600	chr7B:603944234-603944929(+)	TOPLESS-related 1	NA	NA
	TraesCS7B02G347700	chr7B:603992477-603993390(+)	splicing factor PWI domain-containing protein	NA	NA
	TraesCS7B02G347800	chr7B:603996207-603997056(+)	Translation initiation factor IF-2	NA	NA
	TraesCS7B02G347900	chr7B:604034379-604038770(-)	Ran-binding protein 1 domain-containing	Os05g0349500	NA
	TraesCS7B02G348000	chr7B:604098362-604100902(-)	Serine/threonine-protein kinase	Os04g0420300	NA
	TraesCS7B02G348100	chr7B:604327383-604332236(+)	NA	NA	NA
	TraesCS7B02G348200	chr7B:604767568-604808796(+)	Disease resistance protein RPM1	NA	NA
	TraesCS7B02G348300	chr7B:605111043-605112231(-)	Wound-responsive family protein	Os06g0683700	NA
	TraesCS7B02G348400	chr7B:605396248-605396749(+)	Keratin, type II cytoskeletal 3	NA	NA
	TraesCS7B02G348500	chr7B:605420262-605422383(+)	F-box protein	Os06g0685200	NA
	TraesCS7B02G348600	chr7B:605446088-605451560(+)	External alternative NAD(P)H-ubiquinone oxidoreductase B2, mitochondrial	Os06g0684000	AT4G28220
	TraesCS7B02G348700	chr7B:605643747-605645914(+)	Armadillo/beta-catenin repeat protein-like	Os06g0683950	NA
	TraesCS7B02G348800	chr7B:605648771-605652379(-)	2-oxoglutarate (2OG) and Fe(II)-dependent oxygenase superfamily protein	Os06g0683900	NA
	TraesCS7B02G348900	chr7B:605872269-605872565(+)	Wound-responsive family protein	Os06g0683700	NA
	TraesCS7B02G349000	chr7B:605906743-605909873(+)	Cytochrome P450	Os01g0627500	AT3G14680
	TraesCS7B02G349100	chr7B:605954772-605957651(+)	Cytochrome P450	Os01g0627500	AT3G14680
	TraesCS7B02G349200	chr7B:606136222-606137099(+)	BTB/POZ/MATH-domain protein	NA	NA
	TraesCS7B02G349300	chr7B:606142537-606143124(+)	BTB/POZ/MATH-domain protein	NA	NA
	TraesCS7B02G349400	chr7B:606186087-606186786(+)	BTB-POZ and MATH domain protein	NA	NA
	TraesCS7B02G349500	chr7B:606353537-606356738(+)	NA	NA	NA
	TraesCS7B02G349600	chr7B:606398372-606398923(+)	BTB/POZ domain containing protein, expressed	NA	NA
	TraesCS7B02G349700	chr7B:606556159-606563497(+)	Gibberellin 2-oxidase	Os01g0332200	NA
	TraesCS7B02G349800	chr7B:606644011-606646843(-)	Cytochrome P450	Os01g0627500	AT3G14680
	TraesCS7B02G349900	chr7B:607171727-607173335(+)	Glycosyltransferase	NA	NA
	TraesCS7B02G350000	chr7B:607280579-607282246(+)	Glycosyltransferase	NA	NA
	TraesCS7B02G350200	chr7B:607529611-607530000(-)	Calcium-binding family protein	Os06g0683400	NA
	TraesCS7B02G350300	chr7B:607584657-607589530(-)	Beta-glucosidase, putative	Os06g0683300	AT5G54570
	TraesCS7B02G350400	chr7B:607589807-607592141(+)	50S ribosomal protein L24	Os06g0683200	AT5G54600
	TraesCS7B02G350500	chr7B:607642185-607644052(+)	Dihydroflavonol-4-reductase	Os06g0683100	NA
	TraesCS7B02G350600	chr7B:607909048-607911188(+)	FBD-associated F-box protein	NA	NA
	TraesCS7B02G350700	chr7B:607927593-607938218(+)	F-box family protein	NA	NA
	TraesCS7B02G350800	chr7B:608184181-608184759(+)	F-box domain containing protein, expressed	NA	NA
	TraesCS7B02G351000	chr7B:608191954-608194608(+)	Phosphosulfolactate synthase-related protein	Os06g0682900	AT4G21320
	TraesCS7B02G351100	chr7B:608214842-608220600(+)	NBS-LRR disease resistance protein	Os03g0379700	NA
	TraesCS7B02G351200	chr7B:608300510-608301600(-)	E3 ubiquitin-protein ligase	NA	NA
	TraesCS7B02G351300	chr7B:608364310-608364816(+)	Egg cell-secreted protein 1.1	NA	NA
	TraesCS7B02G351400	chr7B:608375332-608375784(+)	Egg cell-secreted protein 1.1	NA	NA
	TraesCS7B02G351500	chr7B:608380045-608380790(+)	Germin-like protein	Os02g0491700	AT5G38940
	TraesCS7B02G351600	chr7B:608392307-608393057(+)	Germin-like protein	Os02g0491800	AT5G38940
	TraesCS7B02G351700	chr7B:608405328-608406075(+)	Germin-like protein	Os02g0491700	AT5G39190
	TraesCS7B02G351800	chr7B:608415055-608416000(+)	Germin-like protein	Os02g0491700	AT5G38940
	TraesCS7B02G351900	chr7B:608470317-608470656(+)	Protease inhibitor/seed storage/lipid transfer family protein	NA	AT3G53980
	TraesCS7B02G352000	chr7B:608476922-608478255(-)	BTB/POZ domain containing protein	NA	NA
	TraesCS7B02G352100	chr7B:608713908-608719976(+)	Zinc finger CCCH domain protein	Os06g0682800	NA
	TraesCS7B02G352200	chr7B:608721097-608725776(+)	SWAP (Suppressor-of-White-APricot)/surp domain-containing protein	Os06g0682700	NA
	TraesCS7B02G352300	chr7B:608874976-608876587(-)	Xyloglucan 6-xylosyltransferase 1	Os03g0305800	AT3G62720
	TraesCS7B02G352400	chr7B:608900534-608902492(+)	Leucine-rich repeat receptor-like protein kinase family protein	NA	NA
	TraesCS7B02G352500	chr7B:608913471-608916447(-)	Solute carrier family 35 protein	Os06g0681700	AT3G07080
	TraesCS7B02G352600	chr7B:609299239-609299604(-)	Major Facilitator Superfamily protein, expressed	Os10g0370700	NA
	TraesCS7B02G352700	chr7B:609704144-609704536(+)	plastid movement impaired protein	NA	NA
	TraesCS7B02G352800	chr7B:609902557-609910753(+)	NA	Os12g0242900	AT1G67630
	TraesCS7B02G353000	chr7B:610454625-610456222(-)	P-loop nucleoside triphosphate hydrolases superfamily protein with CH (Calponin Homology) domain-containing protein	NA	NA
	TraesCS7B02G353100	chr7B:610478459-610483104(+)	Peroxidase	Os06g0681600	AT4G11290
	TraesCS7B02G353200	chr7B:610735320-610737899(-)	Peroxidase	Os06g0681600	AT1G05260
	TraesCS7B02G353300	chr7B:610948180-610948536(+)	Non-lysosomal glucosylceramidase	NA	NA
	TraesCS7B02G353400	chr7B:611048693-611049940(-)	Man1-Src1p-carboxy-terminal domain protein	NA	NA
	TraesCS7B02G353500	chr7B:611443510-611458578(+)	WD-repeat cell cycle regulatory protein	NA	NA
	TraesCS7B02G353600	chr7B:611553396-611556185(-)	NA	Os01g0611000	AT5G11420
	TraesCS7B02G353700	chr7B:611608480-611609563(+)	Myb/SANT-like domain-containing protein	NA	NA
	TraesCS7B02G353800	chr7B:611612690-611620327(+)	receptor kinase 1	NA	NA
	TraesCS7B02G353900	chr7B:611718021-611722004(+)	Transcription initiation factor TFIID subunit 7-like protein	NA	NA
	TraesCS7B02G354000	chr7B:611729707-611742359(-)	NA	Os06g0681400	AT1G31340
	TraesCS7B02G354100	chr7B:611961698-611962747(-)	Polyubiquitin	Os06g0681400	AT5G20620
	TraesCS7B02G354200	chr7B:612255302-612256461(-)	Polyubiquitin	Os06g0681400	AT1G23410
	TraesCS7B02G354300	chr7B:612304821-612315798(+)	Histone-lysine N-methyltransferase	Os09g0307800	AT2G44150
	TraesCS7B02G354400	chr7B:612403515-612406243(+)	Cytochrome P450	Os04g0570500	AT1G12740
	TraesCS7B02G354500	chr7B:612543915-612548174(-)	WD repeat-containing protein 1	Os07g0187700	NA
	TraesCS7B02G354800	chr7B:613176304-613179047(-)	Carbonic anhydrase	Os01g0639900	AT3G01500
	TraesCS7B02G354900	chr7B:613253108-613256883(-)	Carbonic anhydrase	Os01g0639900	NA
	TraesCS7B02G355000	chr7B:613375014-613375301(-)	40S ribosomal protein S21	Os03g0667800	AT5G27700
	TraesCS7B02G355100	chr7B:613876400-613876807(+)	P-loop containing nucleoside triphosphate hydrolases superfamily protein	NA	NA
	TraesCS7B02G355200	chr7B:614181350-614182419(+)	Early nodulin-like protein	Os06g0681200	NA
	TraesCS7B02G355300	chr7B:614220019-614222005(-)	30S ribosomal protein S11	Os02g0162500	AT3G52580
	TraesCS7B02G355400	chr7B:614295868-614298331(+)	Hexokinase-1	NA	AT1G05205
	TraesCS7B02G355500	chr7B:614868166-614874190(+)	Glutamate receptor	Os06g0680500	AT2G32390
	TraesCS7B02G355600	chr7B:615162091-615165502(+)	Peptidyl-prolyl cis-trans isomerase-like protein	Os06g0183900	AT5G58020
	TraesCS7B02G355700	chr7B:615374942-615377792(+)	Cytochrome P450	Os06g0680700	AT1G11600
	TraesCS7B02G355800	chr7B:615794243-615796836(-)	Protein longifolia 1	NA	NA
	TraesCS7B02G355900	chr7B:616407194-616407613(-)	Transmembrane amino acid transporter family protein	NA	NA
	TraesCS7B02G356000	chr7B:616747343-616749928(-)	Serine/threonine-protein kinase	NA	NA
	TraesCS7B02G356100	chr7B:616755032-616758059(-)	Ribosomal RNA small subunit methyltransferase NEP1	Os02g0290400	AT3G57000
	TraesCS7B02G356200	chr7B:616820801-616823292(-)	Serine/threonine-protein kinase	NA	NA
	TraesCS7B02G356300	chr7B:616827017-616831898(-)	Ribosomal RNA small subunit methyltransferase NEP1	Os02g0290400	AT3G57000
	TraesCS7B02G356400	chr7B:616836238-616838679(+)	Serine/threonine-protein kinase	NA	NA
	TraesCS7B02G356500	chr7B:616903091-616905691(+)	Serine/threonine-protein kinase	NA	NA
	TraesCS7B02G356600	chr7B:616911805-616912296(+)	Ubiquinol oxidase	Os04g0600200	NA
	TraesCS7B02G356700	chr7B:617485831-617488326(+)	Serine/threonine-protein kinase	NA	NA
	TraesCS7B02G356800	chr7B:617555314-617557966(-)	Serine/threonine-protein kinase	NA	NA
	TraesCS7B02G356900	chr7B:617559641-617563122(-)	NA	Os09g0104200	NA
	TraesCS7B02G357000	chr7B:617563756-617568475(+)	PRKR interacting protein 1	NA	NA
	TraesCS7B02G357100	chr7B:617571591-617580168(+)	Serine/threonine-protein kinase	NA	NA
	TraesCS7B02G357200	chr7B:617781279-617783695(+)	TRAM, LAG1 and CLN8 (TLC) lipid-sensing domain containing protein	Os12g0242800	AT3G25950
	TraesCS7B02G357300	chr7B:617827973-617829002(+)	DUF4408 domain protein	NA	NA
	TraesCS7B02G357400	chr7B:617839397-617851027(+)	ATP-dependent Clp protease ATP-binding subunit	Os02g0537400	NA
	TraesCS7B02G357500	chr7B:618759101-618763018(-)	ATP-dependent Clp protease ATP-binding subunit	Os02g0537400	NA
	TraesCS7B02G357600	chr7B:618848243-618852343(-)	NA	Os02g0537400	NA
	TraesCS7B02G357700	chr7B:619159152-619169573(+)	receptor kinase 1	NA	NA
	TraesCS7B02G357800	chr7B:619169863-619174329(+)	Receptor-like protein kinase	NA	NA
	TraesCS7B02G357900	chr7B:619588156-619592996(-)	MYB-related transcription factor	Os06g0679400	NA
	TraesCS7B02G358000	chr7B:619611451-619614923(+)	NA	Os06g0679500	AT1G05170
	TraesCS7B02G358200	chr7B:619783502-619784455(+)	MATH domain/coiled-coil protein	NA	NA
	TraesCS7B02G358300	chr7B:620592292-620601055(+)	transmembrane protein	Os03g0707300	NA
	TraesCS7B02G358400	chr7B:620604386-620605356(+)	Phospholipase A2	NA	NA
	TraesCS7B02G358500	chr7B:620652849-620653238(+)	F-box protein	Os06g0679600	NA
	TraesCS7B02G358600	chr7B:620653669-620657394(-)	F-box/LRR repeat protein	Os06g0679700	NA
	TraesCS7B02G358700	chr7B:620657316-620659264(+)	Transmembrane protein, putative	Os12g0481200	AT1G21930
	TraesCS7B02G358800	chr7B:620659882-620663841(+)	NA	Os02g0550700	AT3G12990
	TraesCS7B02G358900	chr7B:620667460-620676655(+)	NA	NA	NA
	TraesCS7B02G359000	chr7B:620677561-620679289(-)	BTB/POZ domain containing protein	NA	NA
	TraesCS7B02G359100	chr7B:620755960-620761346(+)	Heat shock 70 kDa protein	Os06g0679800	AT1G11660
	TraesCS7B02G359200	chr7B:621294453-621300501(+)	Auxin efflux carrier component	Os01g0802700	NA
	TraesCS7B02G359300	chr7B:621396199-621404428(-)	Auxin efflux carrier component	Os01g0802700	NA
	TraesCS7B02G359400	chr7B:621472272-621476050(-)	RNA polymerase II transcription mediator	Os12g0638600	NA
	TraesCS7B02G359500	chr7B:621626462-621626776(+)	Lactoylglutathione lyase	NA	NA
	TraesCS7B02G359700	chr7B:621916777-621920775(+)	L-ascorbate oxidase	Os06g0678800	AT1G76160
	TraesCS7B02G359800	chr7B:622245400-622275962(+)	BEACH domain-containing protein lvsC	Os06g0678650	AT1G58230
	TraesCS7B02G359900	chr7B:622411196-622411540(-)	spindle pole body-associated protein	NA	NA
	TraesCS7B02G360000	chr7B:622433644-622433844(+)	Protein kinase superfamily protein	NA	NA
	TraesCS7B02G360100	chr7B:622460957-622461475(+)	Glutamyl-tRNA(Gln) amidotransferase subunit A	NA	NA
	TraesCS7B02G360200	chr7B:622623306-622625413(+)	Transmembrane protein, putative	NA	NA
	TraesCS7B02G360300	chr7B:622625538-622626703(-)	pleiotropic drug resistance 5	NA	NA
	TraesCS7B02G360400	chr7B:622670095-622673128(+)	Tetraspanin family protein, putative	Os06g0731400	NA
	TraesCS7B02G360500	chr7B:622674365-622674970(-)	Protease inhibitor/seed storage/lipid transfer protein family protein	NA	NA
	TraesCS7B02G360600	chr7B:622682905-622685876(+)	Tetraspanin family protein, putative	Os06g0731400	NA
	TraesCS7B02G360700	chr7B:622687190-622687692(-)	Protease inhibitor/seed storage/lipid transfer protein family protein	NA	NA
	TraesCS7B02G360800	chr7B:622828114-622828927(-)	Parkinson disease 7 domain-containing protein 1	Os06g0678500	NA
	TraesCS7B02G360900	chr7B:622832541-622837816(-)	Protease inhibitor/seed storage/lipid transfer protein family protein	NA	NA
	TraesCS7B02G361000	chr7B:623109319-623124411(+)	Phosphatase 2C family protein	NA	NA
	TraesCS7B02G361100	chr7B:623270162-623270879(-)	Protease inhibitor/seed storage/lipid transfer protein family protein	NA	NA
	TraesCS7B02G361200	chr7B:623372377-623372946(-)	Protease inhibitor/seed storage/lipid transfer protein family protein	NA	NA
	TraesCS7B02G361300	chr7B:623484730-623505389(-)	Protease inhibitor/seed storage/lipid transfer protein family protein	NA	NA
	TraesCS7B02G361400	chr7B:623504303-623522855(-)	NA	NA	NA
	TraesCS7B02G361500	chr7B:623569589-623570254(-)	NADPH-dependent 7-cyano-7-deazaguanine reductase	NA	NA
	TraesCS7B02G361600	chr7B:623818034-623820312(+)	BTB/POZ domain containing protein, expressed	NA	NA
	TraesCS7B02G361700	chr7B:623933324-623933856(-)	Protease inhibitor/seed storage/lipid transfer protein family protein	NA	NA
	TraesCS7B02G361800	chr7B:623943850-623947532(+)	NA	Os02g0321500	AT5G63060
	TraesCS7B02G361900	chr7B:623948037-623949121(+)	Complement C1r subcomponent	NA	NA
	TraesCS7B02G362000	chr7B:623949971-623951292(-)	Mitochondrial transcription termination factor-like	NA	NA
	TraesCS7B02G362100	chr7B:623956799-623957640(-)	DNA-directed RNA polymerase subunit beta	NA	NA
	TraesCS7B02G362200	chr7B:623975587-623978374(-)	Protein kinase-like protein	Os06g0676600	NA
	TraesCS7B02G362300	chr7B:624147758-624150761(-)	Protein kinase-like protein	Os06g0676600	NA
	TraesCS7B02G362500	chr7B:624246336-624246926(+)	B3 domain-containing protein	NA	NA
	TraesCS7B02G362600	chr7B:624348894-624353839(+)	Elongation factor	Os02g0519900	AT1G56070
	TraesCS7B02G362700	chr7B:624468356-624474640(-)	Peptide transporter	Os05g0336200	AT2G40460
	TraesCS7B02G362800	chr7B:624706297-624722927(-)	Receptor-kinase, putative	Os01g0152687	NA
	TraesCS7B02G362900	chr7B:624940018-624945766(+)	Geranylgeranyl diphosphate synthase	Os06g0678200	AT2G34630
	TraesCS7B02G363000	chr7B:624945713-624947380(-)	DnaJ domain-containing protein	Os06g0678100	NA
	TraesCS7B02G363100	chr7B:625296433-625302193(-)	Auxin response factor	Os06g0677800	AT1G30330
	TraesCS7B02G363200	chr7B:625715946-625721126(-)	NA	Os06g0677700	NA
	TraesCS7B02G363300	chr7B:625982156-625982524(-)	Tripartite motif-containing protein 5	NA	NA
	TraesCS7B02G363500	chr7B:626063769-626067231(+)	Leucine-rich repeat receptor-like protein kinase family protein	NA	NA
	TraesCS7B02G363600	chr7B:626068473-626072701(-)	Geranylgeranyl transferase type-2 subunit alpha 1	Os06g0677500	NA
	TraesCS7B02G363700	chr7B:626111513-626114756(-)	NA	Os06g0677400	AT4G20930
	TraesCS7B02G363800	chr7B:626182558-626183858(-)	Alpha/beta-Hydrolases superfamily protein	NA	NA
	TraesCS7B02G363900	chr7B:626238481-626242957(-)	RING/U-box superfamily protein	Os06g0677300	NA
	TraesCS7B02G364000	chr7B:626563421-626568051(-)	B3 domain-containing protein	NA	NA
	TraesCS7B02G364100	chr7B:627054571-627058803(-)	Receptor-like kinase	Os06g0676600	AT1G16670
	TraesCS7B02G364200	chr7B:627054839-627055180(+)	Acyl-CoA N-acyltransferase with RING/FYVE/PHD-type zinc finger domain-containing protein	NA	NA
	TraesCS7B02G364300	chr7B:627299157-627300524(-)	Xyloglucan endotransglucosylase/hydrolase	Os08g0240566	NA
	TraesCS7B02G364400	chr7B:627303182-627309652(-)	NA	NA	NA
	TraesCS7B02G364500	chr7B:627443685-627447015(-)	AUGMIN subunit 2	Os08g0204800	AT2G32980
	TraesCS7B02G364600	chr7B:627610786-627614742(+)	NAC domain-containing protein	Os06g0675600	NA
	TraesCS7B02G364700	chr7B:627946149-627953995(+)	Alpha-glucosidase	Os06g0676700	AT5G11720
	TraesCS7B02G364800	chr7B:627982515-627987790(-)	Metal transporter, putative	Os06g0676000	AT1G15960
	TraesCS7B02G364900	chr7B:628355160-628357144(+)	Patatin	Os06g0677000	NA
	TraesCS7B02G365000	chr7B:628451551-628454667(+)	AUGMIN subunit 2	Os08g0204800	AT2G32980
	TraesCS7B02G365100	chr7B:628466026-628469916(-)	Disease resistance protein (NBS-LRR class) family	NA	NA
	TraesCS7B02G365200	chr7B:628728904-628730791(+)	NBS-LRR-like resistance protein	NA	NA
	TraesCS7B02G365300	chr7B:628732665-628736836(-)	NAC domain protein	Os06g0675600	NA
	TraesCS7B02G365400	chr7B:628761692-628762938(-)	Kinesin-like protein	NA	NA
	TraesCS7B02G365500	chr7B:629019317-629020600(+)	Sulfotransferase	NA	NA
	TraesCS7B02G365600	chr7B:629046429-629048577(-)	Amino acid transporter, putative	Os03g0375966	AT3G13620
	TraesCS7B02G365700	chr7B:629579514-629583409(-)	NA	Os03g0299900	AT4G33680
	TraesCS7B02G365800	chr7B:629779270-629783964(+)	NA	Os06g0674800	NA
	TraesCS7B02G365900	chr7B:629787159-629788439(-)	serine/arginine repetitive matrix-like protein	Os06g0675200	NA
	TraesCS7B02G366000	chr7B:629988631-629991093(+)	E3 ubiquitin-protein ligase SINA-like 2	NA	NA
	TraesCS7B02G366100	chr7B:630091242-630093045(-)	zinc induced facilitator-like 1	NA	NA
	TraesCS7B02G366200	chr7B:630107197-630110084(-)	Nudix hydrolase 14, chloroplastic	NA	NA
	TraesCS7B02G366300	chr7B:630134258-630135568(-)	Myb/SANT-like DNA-binding domain protein	NA	NA
	TraesCS7B02G366400	chr7B:630133073-630139604(+)	Ubiquitin	Os06g0673500	AT2G35635
	TraesCS7B02G366500	chr7B:630175894-630181148(+)	Glycine-rich domain-containing protein 2	NA	NA
	TraesCS7B02G366600	chr7B:630309718-630311495(+)	Polyubiquitin	Os06g0673500	AT4G05050
	TraesCS7B02G366700	chr7B:630552409-630552871(+)	Polyubiquitin	Os06g0673500	AT5G03240
	TraesCS7B02G366800	chr7B:630589436-630590011(+)	Polyubiquitin	Os06g0673500	AT4G05050
	TraesCS7B02G366900	chr7B:630606805-630607047(-)	DNA-directed RNA polymerase subunit beta''	NA	NA
	TraesCS7B02G367000	chr7B:630651539-630651811(-)	serine-rich adhesin for platelets-like protein	NA	NA
	TraesCS7B02G367100	chr7B:630662177-630662818(-)	Chitinase	NA	NA
	TraesCS7B02G367200	chr7B:630807194-630807763(-)	chromosome-partitioning protein, putative (DUF639)	NA	NA
	TraesCS7B02G367300	chr7B:630903507-630904546(+)	TPX2 (targeting protein for Xklp2) protein family	NA	NA
	TraesCS7B02G367400	chr7B:631404422-631406371(+)	LIGHT-DEPENDENT SHORT HYPOCOTYLS-like protein (DUF640)	Os06g0672400	AT5G58500
	TraesCS7B02G367500	chr7B:632174945-632178931(-)	WD repeat-containing protein 1	Os11g0610700	NA
	TraesCS7B02G367600	chr7B:632268963-632271120(-)	Polyubiquitin protein	Os06g0673500	AT1G23410
	TraesCS7B02G367700	chr7B:632336942-632338732(-)	Polyubiquitin	Os06g0673500	AT3G09790
	TraesCS7B02G367800	chr7B:632493372-632495527(-)	Dolichyl-diphosphooligosaccharide--protein glycosyltransferase subunit DAD1	Os04g0397000	AT1G32210
	TraesCS7B02G367900	chr7B:632651523-632659504(-)	NA	Os04g0397000	AT1G32210
	TraesCS7B02G368000	chr7B:632651494-632655877(+)	Disease resistance protein (TIR-NBS-LRR class) family	NA	NA
	TraesCS7B02G368100	chr7B:632659749-632662049(-)	Phosphatidylinositol transfer protein	Os06g0671800	NA
	TraesCS7B02G368200	chr7B:632663280-632670710(-)	NA	Os06g0671700	AT1G30680
	TraesCS7B02G368300	chr7B:632684656-632685780(+)	poly(A) polymerase 2	NA	NA
	TraesCS7B02G368400	chr7B:632729301-632730767(-)	[F-actin]-methionine sulfoxide oxidase MICAL2	NA	NA
	TraesCS7B02G368500	chr7B:632793597-632795681(-)	Pentatricopeptide repeat-containing protein	Os07g0294600	NA
	TraesCS7B02G368600	chr7B:632799627-632800394(-)	Transcription elongation factor (TFIIS) family protein	NA	NA
	TraesCS7B02G368700	chr7B:632965267-632966754(-)	PP2A regulatory subunit TAP46	NA	NA
	TraesCS7B02G368800	chr7B:633005800-633007881(+)	Pentatricopeptide repeat-containing protein	Os07g0294600	NA
	TraesCS7B02G369000	chr7B:633109624-633110742(-)	Eukaryotic aspartyl protease family protein, expressed	NA	NA
	TraesCS7B02G369100	chr7B:633216753-633218673(-)	Heat shock 70 kDa protein	NA	NA
	TraesCS7B02G369200	chr7B:633251878-633253534(+)	Glycosyltransferase	Os04g0565200	NA
	TraesCS7B02G369400	chr7B:633317179-633319926(-)	Dihydrolipoamide acetyltransferase component of pyruvate dehydrogenase complex	NA	NA
	TraesCS7B02G369500	chr7B:633896576-633897696(+)	Tegument protein BRRF2	NA	NA
	TraesCS7B02G369600	chr7B:634300525-634306356(-)	F-box/LRR protein	NA	NA
	TraesCS7B02G369700	chr7B:634559050-634560216(+)	BTB/POZ domain containing protein, expressed	NA	NA
	TraesCS7B02G369800	chr7B:634567046-634568598(-)	MADS box transcription factor	NA	NA
	TraesCS7B02G369900	chr7B:634579508-634579792(-)	SAUR-like auxin-responsive protein family	Os06g0671150	NA
	TraesCS7B02G370000	chr7B:634833900-634836802(-)	Glutathione S-transferase	Os12g0210200	AT2G02380
	TraesCS7B02G370100	chr7B:635065115-635065534(+)	SAUR-like auxin-responsive protein family	Os06g0671150	NA
	TraesCS7B02G370200	chr7B:635170708-635171127(+)	SAUR-like auxin-responsive protein family	Os06g0671150	NA
	TraesCS7B02G370300	chr7B:635300989-635301951(+)	SAUR-like auxin-responsive protein family	Os06g0671150	NA
	TraesCS7B02G370400	chr7B:635748655-635749074(-)	Auxin responsive protein-like	Os06g0671150	NA
	TraesCS7B02G370500	chr7B:635940595-635941014(-)	Auxin responsive protein-like	Os06g0671150	NA
	TraesCS7B02G370600	chr7B:636432264-636433233(-)	SAUR-like auxin-responsive protein family	Os06g0671150	NA
	TraesCS7B02G370700	chr7B:636507232-636508271(+)	Chitinase	NA	NA
	TraesCS7B02G370800	chr7B:636625080-636627698(-)	30S ribosomal protein S13	Os07g0173501	AT1G22780
	TraesCS7B02G370900	chr7B:636940381-636940671(+)	SAUR-like auxin-responsive protein family	Os06g0671150	NA
	TraesCS7B02G371000	chr7B:636983945-636984232(+)	SAUR-like auxin-responsive protein family	Os06g0671150	NA
	TraesCS7B02G371100	chr7B:637225120-637233491(-)	Potassium transporter	Os06g0671000	AT2G30070
	TraesCS7B02G371200	chr7B:637337842-637339156(+)	Ring finger protein, putative	Os06g0666500	NA
	TraesCS7B02G371300	chr7B:637351112-637364971(+)	Protein kinase family protein	Os06g0663200	NA
	TraesCS7B02G371400	chr7B:637478137-637496216(+)	Protein kinase family protein	Os06g0663200	NA
	TraesCS7B02G371500	chr7B:637568353-637590300(+)	Protein kinase family protein	Os06g0663200	NA
	TraesCS7B02G371600	chr7B:637618064-637622426(-)	F-box protein	NA	NA
	TraesCS7B02G371700	chr7B:637689973-637692778(-)	Chalcone synthase	NA	NA
	TraesCS7B02G371900	chr7B:637768745-637774947(-)	Peptidyl-prolyl cis-trans isomerase-like protein	Os06g0670500	AT1G53720
	TraesCS7B02G372000	chr7B:637821611-637823763(-)	Homeodomain-like superfamily protein	Os06g0670300	NA
	TraesCS7B02G372100	chr7B:637914145-637916317(-)	Homeodomain-like superfamily protein	Os06g0670300	NA
	TraesCS7B02G372200	chr7B:637949076-637951074(-)	Homeodomain-like superfamily protein	Os06g0670300	NA
	TraesCS7B02G372300	chr7B:638066058-638070449(+)	Aspartyl/glutamyl-tRNA(Asn/Gln) amidotransferase subunit B, putative isoform 2	Os06g0670100	NA
	TraesCS7B02G372400	chr7B:638070498-638077269(-)	Molybdenum cofactor sulfurase	Os06g0670000	AT1G16540
	TraesCS7B02G372500	chr7B:638129515-638134455(-)	MYB-related transcription factor	Os06g0669700	NA
	TraesCS7B02G372600	chr7B:638485451-638489190(+)	OTU domain-containing protein	Os06g0669800	AT3G02070
	TraesCS7B02G372700	chr7B:638509565-638515410(+)	Embryo yellow protein	Os06g0669600	AT5G51430
	TraesCS7B02G372800	chr7B:638610203-638610652(-)	Aspartyl/glutamyl-tRNA(Asn/Gln) amidotransferase subunit B	NA	NA
	TraesCS7B02G372900	chr7B:638791153-638794015(-)	F-box protein	NA	NA
	TraesCS7B02G373000	chr7B:638881377-638885540(+)	ATP-dependent zinc metalloprotease FTSH protein	Os06g0669400	AT2G30950
	TraesCS7B02G373100	chr7B:638913551-638923559(+)	Poly(A) polymerase	Os06g0669275	NA

## Sheet: SV
Table S4.5 Annotation genes within the 4 Mb region flanking of the significant SNPs included in stable QTL for SV
QTL	Gene	Location	Description	Oryza sativa	Arabidopsis thaliana
qSV2D.3	TraesCS2D02G381500	chr2D:485749300-485750706(+)	Embryo sac development arrest 6, putative	Os04g0512500	NA
	TraesCS2D02G381600	chr2D:485842348-485845979(+)	Protein BREAST CANCER SUSCEPTIBILITY 1-like protein	Os04g0512400	NA
	TraesCS2D02G381700	chr2D:485846617-485849064(+)	NA	Os04g0512300	NA
	TraesCS2D02G381800	chr2D:485983997-485987988(+)	Fatty acid hydroxylase superfamily protein	Os04g0512200	AT1G02205
	TraesCS2D02G381900	chr2D:485989384-485994221(+)	Fatty acid hydroxylase superfamily protein	Os04g0512200	AT1G02205
	TraesCS2D02G382000	chr2D:485999176-486002030(+)	Aspartyl/glutamyl-tRNA(Asn/Gln) amidotransferase subunit B, putative isoform 1	Os04g0511700	NA
	TraesCS2D02G382100	chr2D:486244713-486250602(+)	RING/U-box superfamily protein	Os04g0511600	NA
	TraesCS2D02G382200	chr2D:486324319-486330865(+)	Transporter	Os04g0511400	AT4G16480
	TraesCS2D02G382300	chr2D:486331488-486333024(+)	Caleosin	Os04g0511200	AT2G33380
	TraesCS2D02G382400	chr2D:486390272-486392935(+)	Vacuolar-processing enzyme	Os04g0537900	AT1G62710
	TraesCS2D02G382500	chr2D:486392195-486395421(-)	Histidine triad nucleotide binding protein	Os04g0535400	AT4G16566
	TraesCS2D02G382600	chr2D:486499933-486505905(+)	NA	Os04g0535600	AT1G62660
	TraesCS2D02G382700	chr2D:486955433-486957936(-)	YABBY protein	Os04g0536300	NA
	TraesCS2D02G382800	chr2D:487055251-487059066(-)	NAC domain protein,	Os04g0536500	AT1G62700
	TraesCS2D02G382900	chr2D:487315889-487316473(+)	Pathogenesis-related protein 1	NA	NA
	TraesCS2D02G383000	chr2D:487335889-487336164(-)	B3 domain-containing protein family	NA	NA
	TraesCS2D02G383100	chr2D:487360705-487362570(+)	Acidic leucine-rich nuclear phosphoprotein 32 family B protein	NA	NA
	TraesCS2D02G383200	chr2D:487493419-487493907(+)	SAUR-like auxin-responsive family protein	Os04g0537100	NA
	TraesCS2D02G383300	chr2D:487723116-487725292(-)	Vacuolar-processing enzyme	Os04g0537900	AT1G62710
	TraesCS2D02G383400	chr2D:487932231-487934953(-)	Vacuolar-processing enzyme	Os04g0537900	AT1G62710
	TraesCS2D02G383500	chr2D:488055731-488059567(-)	Vacuolar-processing enzyme	Os04g0537900	AT1G62710
	TraesCS2D02G383600	chr2D:488217395-488220862(+)	Hsp70-Hsp90 organizing protein 1	Os04g0538000	AT1G62740
	TraesCS2D02G383700	chr2D:488229155-488229528(+)	Light-independent protochlorophyllide reductase iron-sulfur ATP-binding protein	NA	NA
	TraesCS2D02G383800	chr2D:488230975-488236927(-)	Elongation factor G	Os04g0538100	AT1G62750
	TraesCS2D02G383900	chr2D:488363535-488364514(-)	Vacuolar iron transporter	Os04g0538400	AT3G43660
	TraesCS2D02G384000	chr2D:488452973-488454207(-)	Cysteine desulfurase	NA	NA
	TraesCS2D02G384100	chr2D:488471566-488472572(-)	Vacuolar iron transporter	Os04g0538400	AT3G43660
	TraesCS2D02G384200	chr2D:488552345-488553579(-)	Cysteine desulfurase	NA	NA
	TraesCS2D02G384300	chr2D:488994224-488995573(-)	Major facilitator superfamily protein	NA	NA
	TraesCS2D02G384400	chr2D:489008674-489009930(-)	Hydroxyproline-rich glycoprotein family protein	NA	NA
	TraesCS2D02G384500	chr2D:489368522-489370921(-)	Cysteine desulfurase	Os12g0190400	NA
	TraesCS2D02G384600	chr2D:489405882-489412577(-)	NA	Os04g0538700	NA
	TraesCS2D02G384700	chr2D:489574417-489574716(+)	Phosphoglucosamine mutase	NA	NA
	TraesCS2D02G384800	chr2D:489593613-489593924(+)	Phosphoglucosamine mutase	NA	NA
	TraesCS2D02G384900	chr2D:489637603-489637914(+)	Phosphoglucosamine mutase	NA	NA
	TraesCS2D02G385000	chr2D:489638090-489643283(-)	Kinesin-like protein	Os04g0538800	NA
	TraesCS2D02G385100	chr2D:489645242-489650315(-)	BRCT domain-containing protein	NA	NA
	TraesCS2D02G385200	chr2D:489667140-489668160(+)	Metallothiol transferase fosB	Os04g0538900	NA
	TraesCS2D02G385300	chr2D:489698342-489699667(+)	NAD(P)H-quinone oxidoreductase subunit M	Os04g0539000	AT4G37925
	TraesCS2D02G385400	chr2D:489933212-489933709(-)	Cortactin-binding protein 2	NA	NA
	TraesCS2D02G385500	chr2D:490117261-490118978(+)	Homeobox leucine zipper protein	NA	NA
	TraesCS2D02G385600	chr2D:490124820-490132486(-)	Required to maintain repression 2	NA	NA
	TraesCS2D02G385700	chr2D:490577893-490579351(+)	Uroporphyrinogen decarboxylase	Os04g0539100	NA
	TraesCS2D02G385800	chr2D:490618816-490623778(+)	Required to maintain repression 2	NA	NA
	TraesCS2D02G385900	chr2D:490677005-490681326(-)	Required to maintain repression 2	Os04g0539100	NA
	TraesCS2D02G386000	chr2D:490727245-490729226(-)	Cytochrome P450 family protein	Os04g0539300	NA
	TraesCS2D02G386100	chr2D:491192742-491195170(+)	GATA transcription factor	Os04g0539500	NA
	TraesCS2D02G386200	chr2D:491377370-491382371(-)	SH3 domain-containing protein 2	Os04g0539800	AT4G34660
	TraesCS2D02G386300	chr2D:491429370-491431171(+)	Zinc finger, B-box	Os04g0540200	NA
	TraesCS2D02G386400	chr2D:491498833-491501092(+)	Protein COBRA	Os04g0540300	NA
	TraesCS2D02G386500	chr2D:491799571-491801301(+)	Formin-like protein	NA	AT1G31810
	TraesCS2D02G386600	chr2D:491802415-491808745(+)	Formin-like protein	Os10g0119300	AT1G31810
	TraesCS2D02G386700	chr2D:491809879-491814777(-)	Aldehyde dehydrogenase	Os04g0540600	AT4G36250
	TraesCS2D02G386800	chr2D:491946854-491952076(+)	Multiprotein-bridging factor, putative	Os08g0366100	AT2G42680
	TraesCS2D02G386900	chr2D:492021498-492023218(-)	Kinase family protein	Os04g0540900	NA
	TraesCS2D02G387000	chr2D:492054619-492075235(-)	Terpene cyclase/mutase family member	Os02g0139700	AT2G07050
	TraesCS2D02G387100	chr2D:492508384-492512530(-)	Trihelix transcription factor GT-2	Os04g0541100	NA
	TraesCS2D02G387200	chr2D:492657404-492663218(+)	Sphingoid long-chain bases kinase 1	Os04g0541500	AT5G23450
	TraesCS2D02G387300	chr2D:492676247-492677882(+)	Homeobox protein, putative	Os04g0541700	NA
	TraesCS2D02G387400	chr2D:492713547-492715711(+)	Ubiquitin-specific protease family C19-related protein	Os04g0541900	NA
	TraesCS2D02G387500	chr2D:492900382-492901335(+)	senescence regulator (Protein of unknown function, DUF584)	Os04g0542000	NA
	TraesCS2D02G387600	chr2D:493003710-493008356(-)	NA	Os04g0542200	AT5G53550
	TraesCS2D02G387700	chr2D:493077613-493082231(-)	NA	Os04g0542200	AT5G53550
	TraesCS2D02G387800	chr2D:493173893-493177351(-)	NA	Os04g0542800	AT5G24380
	TraesCS2D02G387900	chr2D:493196169-493198991(+)	NA	Os04g0542900	AT4G17100
	TraesCS2D02G388000	chr2D:493199468-493201805(-)	Kinase family protein	Os04g0543000	AT4G17660
	TraesCS2D02G388100	chr2D:493512942-493521348(+)	Eukaryotic translation initiation factor 4G	NA	NA
	TraesCS2D02G388200	chr2D:493521755-493526341(-)	Casein kinase II subunit beta	Os10g0564900	AT4G17640
qSV4B	TraesCS4B02G354000	chr4B:645896593-645897773(-)	Zinc finger protein, putative	NA	NA
	TraesCS4B02G354100	chr4B:645966816-645967364(-)	GRF zinc finger family protein	NA	NA
	TraesCS4B02G354200	chr4B:646112635-646115571(+)	L-allo-threonine aldolase	Os04g0516600	AT3G04520
	TraesCS4B02G354300	chr4B:646117258-646121590(-)	Outer membrane protein A	Os03g0118100	NA
	TraesCS4B02G354400	chr4B:646129250-646129816(-)	Dehydration-responsive element binding factor	Os03g0117900	AT5G52020
	TraesCS4B02G354500	chr4B:646137573-646143568(+)	Pentatricopeptide repeat-containing protein	Os09g0573000	AT1G12700
	TraesCS4B02G354600	chr4B:646139984-646142986(-)	NA	Os03g0117800	AT3G61080
	TraesCS4B02G354700	chr4B:646145800-646146702(-)	Xyloglucan endotransglucosylase/hydrolase	Os03g0117300	NA
	TraesCS4B02G354800	chr4B:646174632-646175273(-)	Xyloglucan endotransglucosylase/hydrolase	Os03g0117300	NA
	TraesCS4B02G354900	chr4B:646182872-646183336(+)	Xyloglucan endotransglucosylase/hydrolase	Os03g0117300	NA
	TraesCS4B02G355000	chr4B:646187143-646189840(-)	Riboflavin biosynthesis protein RibD	Os03g0117200	NA
	TraesCS4B02G355100	chr4B:646193428-646195589(+)	Peroxisomal membrane protein 11 homolog	Os03g0117100	AT3G61070
	TraesCS4B02G355200	chr4B:646215545-646222275(+)	DNA-directed RNA polymerase subunit beta''	NA	NA
	TraesCS4B02G355300	chr4B:646223370-646225282(-)	U-box domain-containing protein 4	Os03g0116900	AT2G45720
	TraesCS4B02G355400	chr4B:646322480-646323639(+)	Nucleic acid-binding, OB-fold	Os03g0114200	NA
	TraesCS4B02G355500	chr4B:646366906-646368837(+)	Translation initiation factor 1A	Os03g0114200	NA
	TraesCS4B02G355600	chr4B:646655238-646657479(+)	4-hydroxy-tetrahydrodipicolinate reductase	Os03g0118600	AT5G52100
	TraesCS4B02G355700	chr4B:646657922-646660701(-)	26S proteasome non-ATPase regulatory subunit-like protein	Os04g0444600	AT1G29150
	TraesCS4B02G355800	chr4B:646668115-646672694(-)	F-box family protein, putative, expressed	Os03g0116800	NA
	TraesCS4B02G355900	chr4B:646818225-646819084(-)	Cysteine-rich receptor-kinase-like protein	Os03g0564600	NA
	TraesCS4B02G356000	chr4B:646843491-646857585(+)	Cell number regulator 6	Os03g0101800	AT2G45010
	TraesCS4B02G356100	chr4B:646862708-646864601(+)	12-oxophytodienoate reductase-like protein	Os06g0216200	AT1G09400
	TraesCS4B02G356200	chr4B:646872753-646873436(+)	Defensin	NA	NA
	TraesCS4B02G356300	chr4B:646922532-646924895(-)	F-box protein PP2-A13	Os03g0116700	AT3G61060
	TraesCS4B02G356400	chr4B:646967414-646967968(-)	Asparagine synthetase [glutamine-hydrolyzing] protein	Os03g0116600	NA
	TraesCS4B02G356500	chr4B:646968108-646973292(+)	COP9 signalosome complex subunit 1	Os03g0116500	AT3G61140
	TraesCS4B02G356600	chr4B:646973292-646976284(-)	Rhomboid-like protein	Os03g0116400	AT1G12750
	TraesCS4B02G356700	chr4B:647029967-647035594(-)	ARM repeat superfamily protein	NA	NA
	TraesCS4B02G356800	chr4B:647622640-647626484(+)	Cell wall invertase	Os02g0534400	AT3G52600
	TraesCS4B02G356900	chr4B:647635585-647640055(-)	NA	Os03g0116300	NA
	TraesCS4B02G357000	chr4B:647664691-647665074(-)	Disease resistance protein RPM1	NA	NA
	TraesCS4B02G357100	chr4B:647692300-647693971(-)	Chalcone synthase	NA	NA
	TraesCS4B02G357200	chr4B:647712208-647729731(+)	KHG/KDPG aldolase	NA	NA
	TraesCS4B02G357300	chr4B:647758599-647759375(-)	Chaperone protein ClpB	NA	NA
	TraesCS4B02G357400	chr4B:648061628-648067359(+)	Chaperone protein clpB	NA	NA
	TraesCS4B02G357500	chr4B:648090814-648093615(-)	KHG/KDPG aldolase	NA	NA
	TraesCS4B02G357600	chr4B:648194509-648195237(+)	Chalcone synthase	Os10g0162856	NA
	TraesCS4B02G357700	chr4B:648219918-648220631(+)	Chalcone synthase	Os10g0162856	NA
	TraesCS4B02G357800	chr4B:648243609-648244505(+)	Chalcone synthase	Os10g0168300	NA
	TraesCS4B02G357900	chr4B:648314589-648319660(-)	Membrane protein insertase YidC	Os03g0116000	NA
	TraesCS4B02G358000	chr4B:648498795-648502912(-)	Palmitoyl-protein thioesterase 1	Os03g0101100	AT3G60340
	TraesCS4B02G358100	chr4B:648514058-648516196(+)	Zinc finger (C3HC4-type RING finger) protein family-like	Os04g0266700	NA
	TraesCS4B02G358200	chr4B:648572439-648574084(+)	Short-chain dehydrogenase/reductase family protein	Os03g0115700	AT4G24050
	TraesCS4B02G358300	chr4B:648694470-648695631(-)	Short-chain dehydrogenase/reductase family protein	Os03g0115700	AT4G24050
	TraesCS4B02G358400	chr4B:648912253-648914008(-)	Short-chain dehydrogenase/reductase family protein	Os03g0115700	AT4G24050
	TraesCS4B02G358500	chr4B:649221583-649222957(-)	Short-chain dehydrogenase/reductase family protein	Os03g0115700	AT4G24050
	TraesCS4B02G358600	chr4B:649353802-649355825(+)	FAD-binding Berberine family protein, putative	NA	NA
	TraesCS4B02G358700	chr4B:649359374-649361289(-)	Cold regulated protein 27	NA	NA
	TraesCS4B02G358800	chr4B:649469807-649475248(+)	Respiratory burst oxidase, putative	Os01g0360200	AT1G09090
	TraesCS4B02G358900	chr4B:649490285-649492763(+)	CASP-like protein	NA	NA
	TraesCS4B02G359000	chr4B:649527096-649528529(-)	Leucine-rich repeat receptor kinase-like protein	NA	NA
	TraesCS4B02G359100	chr4B:649540860-649549259(+)	Ankyrin repeat protein family-like protein	NA	NA
	TraesCS4B02G359200	chr4B:649582862-649585550(-)	Pyridoxine/pyridoxamine 5'-phosphate oxidase	Os03g0115500	AT2G46580
	TraesCS4B02G359300	chr4B:649602163-649607404(-)	WD-repeat protein, putative	Os03g0115400	NA
	TraesCS4B02G359400	chr4B:649624168-649624431(+)	GRF zinc finger family protein	NA	NA
	TraesCS4B02G359500	chr4B:649835123-649837054(-)	L-gulonolactone oxidase	Os08g0114300	AT5G56470
	TraesCS4B02G359600	chr4B:650036775-650039477(-)	L-gulonolactone oxidase	Os08g0114300	AT5G56470
	TraesCS4B02G359700	chr4B:650107768-650110116(-)	L-gulonolactone oxidase	Os02g0124599	AT5G56470
	TraesCS4B02G359800	chr4B:650169595-650171680(-)	L-gulonolactone oxidase	Os08g0114300	AT5G56470
	TraesCS4B02G359900	chr4B:650269749-650271356(+)	Pentatricopeptide repeat-containing protein	Os03g0115300	NA
	TraesCS4B02G360000	chr4B:650271891-650273036(-)	BTB/POZ and MATH domain-containing protein 2	NA	NA
	TraesCS4B02G360100	chr4B:650407052-650411906(-)	Cytochrome P450-like protein	NA	NA
	TraesCS4B02G360200	chr4B:650487748-650488819(-)	Cytochrome P450-like protein	NA	AT1G11680
	TraesCS4B02G360300	chr4B:650527621-650529551(-)	Cytochrome P450-like protein	NA	NA
	TraesCS4B02G360400	chr4B:650600613-650601680(-)	BTB/POZ and MATH domain-containing protein 2	NA	NA
	TraesCS4B02G360500	chr4B:650631712-650636559(+)	Bifunctional fucokinase/fucose pyrophosphorylase	Os03g0115100	AT1G01220
	TraesCS4B02G360600	chr4B:650655847-650659356(+)	Receptor-kinase, putative	Os03g0125600	NA
	TraesCS4B02G360700	chr4B:650665159-650666967(-)	Pyridoxine/pyridoxamine 5'-phosphate oxidase	Os03g0115500	AT2G46580
	TraesCS4B02G360800	chr4B:650683204-650688747(+)	NA	Os03g0107800	AT3G52180
	TraesCS4B02G360900	chr4B:650689571-650690289(-)	cyclin-dependent kinase inhibitor SMR3-like protein	Os03g0107700	NA
	TraesCS4B02G361000	chr4B:650696121-650699080(-)	NA	Os03g0107600	NA
	TraesCS4B02G361100	chr4B:650701185-650702364(-)	LOB domain-containing protein	NA	NA
	TraesCS4B02G361200	chr4B:650705820-650706975(-)	LOB domain-containing protein	NA	NA
	TraesCS4B02G361300	chr4B:650728588-650730524(+)	RING/U-box superfamily protein	Os02g0178600	NA
	TraesCS4B02G361400	chr4B:650864326-650865432(+)	transmembrane protein, putative (DUF594)	NA	NA
	TraesCS4B02G361500	chr4B:650881870-650885114(+)	NBS-LRR disease resistance protein	NA	NA
	TraesCS4B02G361600	chr4B:650886426-650887769(+)	BTB/POZ domain containing protein, expressed	NA	NA
	TraesCS4B02G361700	chr4B:650888272-650896311(-)	F-box and Leucine Rich Repeat domains containing protein, putative isoform 1	Os03g0107400	NA
	TraesCS4B02G361800	chr4B:650934964-650937855(+)	Small nuclear ribonucleoprotein-like protein	Os05g0314100	AT3G62840
	TraesCS4B02G361900	chr4B:650960656-650963338(+)	Silicon transporter	Os03g0107300	AT1G02260
	TraesCS4B02G362000	chr4B:650972572-650975515(+)	NA	Os03g0107000	AT3G61415
	TraesCS4B02G362100	chr4B:651021983-651023082(+)	Expansin protein	Os03g0106500	NA
	TraesCS4B02G362200	chr4B:651147675-651148031(+)	Pollen allergen-like protein	Os03g0106800	NA
	TraesCS4B02G362300	chr4B:651514337-651515590(+)	Aquaporin	Os07g0448100	AT4G35100
	TraesCS4B02G362400	chr4B:651735240-651735728(+)	Acetyl-coenzyme A carboxylase carboxyl transferase subunit beta, chloroplastic	NA	NA
	TraesCS4B02G362500	chr4B:651752889-651754068(+)	Expansin protein	Os03g0106500	NA
	TraesCS4B02G362600	chr4B:651769125-651770263(-)	Expansin protein	Os03g0106900	NA
	TraesCS4B02G362800	chr4B:651904068-651904442(+)	Pollen allergen-like protein	Os03g0106900	NA
	TraesCS4B02G362900	chr4B:651976125-651976367(-)	VACUOLAR SORTING RECEPTOR 2	NA	NA
	TraesCS4B02G363000	chr4B:651987162-651990893(+)	Branched-chain-amino-acid aminotransferase	Os03g0106400	AT3G49680
	TraesCS4B02G363100	chr4B:651991316-651994109(-)	Fatty acyl-CoA reductase	Os09g0567500	NA
	TraesCS4B02G363200	chr4B:652001040-652003347(-)	E3 ubiquitin-protein ligase	Os06g0311300	NA
	TraesCS4B02G363300	chr4B:652233249-652236586(-)	F-box family protein	NA	NA
	TraesCS4B02G363400	chr4B:652272282-652277787(+)	PAIR1 protein, putative, expressed	Os03g0106300	NA
	TraesCS4B02G363500	chr4B:652279101-652284529(+)	Phosphatidylinositol N-acetyglucosaminlytransferase subunit P-like protein	Os03g0106200	NA
	TraesCS4B02G363600	chr4B:652284107-652284520(-)	nuclear pore complex protein (DUF3414)	NA	NA
	TraesCS4B02G363700	chr4B:652288572-652291539(-)	Apyrase	Os11g0126800	NA
	TraesCS4B02G363800	chr4B:652371031-652373935(+)	Acid phosphatase 1	NA	NA
	TraesCS4B02G363900	chr4B:652376002-652378727(+)	Acid phosphatase 1	NA	NA
	TraesCS4B02G364000	chr4B:652398013-652400195(+)	Acid phosphatase 1	NA	NA
	TraesCS4B02G364100	chr4B:652414628-652416298(+)	Acid phosphatase 1	NA	NA
	TraesCS4B02G364200	chr4B:652767652-652779567(+)	Mediator of RNA polymerase II transcription subunit 12	Os07g0648300	NA
	TraesCS4B02G364300	chr4B:652813915-652817934(+)	Bestrophin/UPF0187	Os03g0106000	NA
	TraesCS4B02G364400	chr4B:652852840-652857989(+)	NA	Os03g0105800	NA
	TraesCS4B02G364500	chr4B:652913965-652915688(-)	Glycosyltransferase	Os09g0330000	NA
	TraesCS4B02G364600	chr4B:652955888-652956967(-)	F-box family protein	NA	NA
	TraesCS4B02G364700	chr4B:652966892-652968732(+)	Jasmonate-zim-domain protein	NA	NA
	TraesCS4B02G364800	chr4B:652993859-653002438(-)	basic helix-loop-helix (bHLH) DNA-binding superfamily protein	NA	NA
	TraesCS4B02G364900	chr4B:653009147-653015549(+)	Basic helix-loop-helix DNA-binding superfamily protein, putative	NA	NA
	TraesCS4B02G365000	chr4B:653143398-653148646(+)	ATP-binding cassette transporter subfamily A member	Os08g0398300	AT3G47790
	TraesCS4B02G365100	chr4B:653209586-653213139(+)	Cytochrome P450 family cinnamate 4-hydroxylase	Os05g0320700	AT2G30490
	TraesCS4B02G365200	chr4B:653216560-653219227(+)	F-box family protein	NA	NA
	TraesCS4B02G365300	chr4B:653410438-653412910(+)	FBD-associated F-box protein	NA	NA
	TraesCS4B02G365400	chr4B:653413054-653416615(-)	NBS-LRR disease resistance protein	Os11g0676200	NA
	TraesCS4B02G365500	chr4B:653419239-653422614(-)	Pentatricopeptide repeat-containing protein	Os10g0422566	AT1G03100
	TraesCS4B02G365600	chr4B:653426747-653432037(-)	basic helix-loop-helix (bHLH) DNA-binding superfamily protein	NA	NA
	TraesCS4B02G365700	chr4B:653517772-653529236(-)	Proliferating cell nuclear antigen	NA	NA
	TraesCS4B02G365800	chr4B:653520945-653522683(+)	Sorting and assembly machinery component 50 like	Os12g0105700	NA
	TraesCS4B02G365900	chr4B:653624104-653624367(+)	Type 2 DNA topoisomerase 6 subunit B	NA	NA
	TraesCS4B02G366000	chr4B:653689366-653690316(-)	Wall-associated receptor kinase 5	NA	NA
	TraesCS4B02G366100	chr4B:653732875-653735588(-)	Proliferating cell nuclear antigen	NA	NA
	TraesCS4B02G366200	chr4B:653916035-653916667(-)	OTU domain-containing protein	NA	NA
	TraesCS4B02G366300	chr4B:653949299-653949758(-)	DNA topoisomerase	NA	NA
	TraesCS4B02G366400	chr4B:653968699-653972299(+)	AT hook motif DNA-binding family protein	Os03g0105700	NA
	TraesCS4B02G366500	chr4B:654035782-654037898(-)	Tubulin beta chain	Os03g0105600	AT5G62690
	TraesCS4B02G366600	chr4B:654042563-654043841(-)	MYB-related transcription factor	NA	NA
	TraesCS4B02G366800	chr4B:654089504-654091513(+)	Flavin-containing monooxygenase	Os10g0553800	AT1G62620
	TraesCS4B02G366900	chr4B:654125091-654126639(-)	Potassium channel KAT1	NA	NA
	TraesCS4B02G367000	chr4B:654128626-654131904(+)	Receptor-like protein kinase, putative	NA	NA
	TraesCS4B02G367100	chr4B:654201942-654203136(+)	F-box protein	NA	NA
	TraesCS4B02G367200	chr4B:654263178-654267773(+)	Signal recognition particle protein	Os08g0480100	AT4G30600
	TraesCS4B02G367300	chr4B:654273505-654275964(-)	Scarecrow transcription factor family protein	Os10g0551200	NA
	TraesCS4B02G367400	chr4B:654440796-654441242(+)	14 kDa proline-rich protein DC2.15	Os03g0103300	NA
	TraesCS4B02G367500	chr4B:654453330-654453749(-)	14 kDa proline-rich protein DC2.15	Os03g0103300	AT4G12520
	TraesCS4B02G367600	chr4B:654465903-654466496(-)	14 kDa proline-rich protein DC2.15	Os03g0103300	AT4G12510
	TraesCS4B02G367700	chr4B:654560940-654561404(-)	Cortical cell-delineating protein	Os03g0103100	NA
	TraesCS4B02G367800	chr4B:654592596-654593027(-)	Cortical cell-delineating protein	Os03g0103100	NA
	TraesCS4B02G367900	chr4B:654602705-654603143(-)	Cortical cell-delineating protein	NA	NA
	TraesCS4B02G368000	chr4B:654606592-654607062(-)	Cortical cell-delineating protein	Os03g0103200	NA
	TraesCS4B02G368100	chr4B:654674693-654675729(-)	myosin 2	NA	NA
	TraesCS4B02G368200	chr4B:654699101-654699538(-)	Cortical cell-delineating protein	Os03g0103200	NA
	TraesCS4B02G368300	chr4B:654719678-654720109(-)	Cortical cell-delineating protein	Os03g0103100	NA
	TraesCS4B02G368400	chr4B:654731472-654731861(-)	Cortical cell-delineating protein	Os10g0552700	NA
	TraesCS4B02G368500	chr4B:654734070-654734513(-)	Cortical cell-delineating protein	NA	NA
	TraesCS4B02G368600	chr4B:654751596-654752033(-)	Cortical cell-delineating protein	Os03g0103200	NA
	TraesCS4B02G368700	chr4B:654761835-654762272(-)	Cortical cell-delineating protein	Os03g0103100	NA
	TraesCS4B02G368800	chr4B:654774041-654774478(-)	Cortical cell-delineating protein	Os03g0103100	NA
	TraesCS4B02G368900	chr4B:654793453-654793824(-)	Cortical cell-delineating protein	Os03g0103200	NA
	TraesCS4B02G369000	chr4B:654806594-654806983(-)	Cortical cell-delineating protein	Os03g0103100	NA
	TraesCS4B02G369100	chr4B:654810532-654811005(-)	Cortical cell-delineating protein	NA	NA
	TraesCS4B02G369200	chr4B:654892610-654894282(+)	HXXXD-type acyl-transferase family protein	NA	NA
	TraesCS4B02G369300	chr4B:654924853-654925540(-)	14 kDa proline-rich protein DC2.15	NA	NA
	TraesCS4B02G369400	chr4B:654965422-654965826(-)	Cortical cell-delineating protein	NA	NA
	TraesCS4B02G369500	chr4B:655036289-655036693(-)	14 kDa proline-rich protein DC2.15	NA	NA
	TraesCS4B02G369600	chr4B:655091831-655092268(-)	Cortical cell-delineating protein	Os10g0552700	NA
	TraesCS4B02G369700	chr4B:655111018-655111407(-)	Cortical cell-delineating protein	Os10g0552700	NA
	TraesCS4B02G369800	chr4B:655174323-655175339(+)	Zinc finger protein	NA	NA
	TraesCS4B02G369900	chr4B:655753649-655754932(+)	C2H2-like zinc finger protein	Os10g0554001	NA
	TraesCS4B02G370000	chr4B:655771123-655774984(-)	T-box transcription factor, putative (DUF863)	NA	NA
	TraesCS4B02G370100	chr4B:655791980-655792243(+)	GRF zinc finger family protein	NA	NA
	TraesCS4B02G370200	chr4B:656159507-656164423(+)	Flavin-containing monooxygenase	Os10g0553800	AT1G62620
	TraesCS4B02G370300	chr4B:656165914-656166201(-)	B3 domain-containing protein family	NA	NA
	TraesCS4B02G370400	chr4B:656262472-656265736(+)	Flavin-containing monooxygenase	Os10g0553800	AT1G62620
	TraesCS4B02G370500	chr4B:656284674-656287060(+)	Flavin-containing monooxygenase	Os10g0553800	AT1G62620
	TraesCS4B02G370600	chr4B:656326666-656327079(+)	Cortical cell-delineating protein	NA	NA
	TraesCS4B02G370700	chr4B:656329793-656330206(+)	Cortical cell-delineating protein	NA	NA
	TraesCS4B02G370800	chr4B:656815048-656817444(+)	Sodium transporter family protein	Os01g0307500	NA
	TraesCS4B02G371000	chr4B:656821274-656828454(+)	Nitrate transporter 1.1	Os03g0103000	AT1G12110
	TraesCS4B02G371100	chr4B:656878737-656883479(+)	Disease resistance protein (NBS-LRR class) family	NA	NA
	TraesCS4B02G371200	chr4B:656891495-656893325(+)	Glycosyltransferase	NA	NA
	TraesCS4B02G371300	chr4B:656899576-656903057(+)	Palmitoyl protein thioesterase containing protein, expressed	Os10g0563000	AT3G60340
	TraesCS4B02G371400	chr4B:656903504-656911031(-)	Protein ARABIDILLO 1	Os10g0563200	AT2G44900
	TraesCS4B02G371500	chr4B:657159331-657160442(+)	BTB/POZ and MATH domain-containing protein 1	NA	NA
	TraesCS4B02G371600	chr4B:657165491-657170782(-)	Protein kinase	Os10g0561500	NA
	TraesCS4B02G371700	chr4B:657171824-657176698(-)	NA	Os10g0561300	AT5G61520
	TraesCS4B02G371800	chr4B:657182353-657184517(-)	Phosphoglycerate mutase family protein	Os03g0101500	NA
	TraesCS4B02G371900	chr4B:657184891-657188101(-)	Alcohol dehydrogenase	Os03g0101600	AT5G61510
	TraesCS4B02G372000	chr4B:657232525-657233073(-)	DNA topoisomerase	NA	NA
	TraesCS4B02G372100	chr4B:657243113-657246017(+)	Leucine-rich repeat receptor protein kinase family protein	Os03g0440900	AT5G21090
	TraesCS4B02G372200	chr4B:657270914-657273316(+)	Leucine-rich repeat receptor-like protein kinase family	Os01g0279800	AT5G21090
	TraesCS4B02G372300	chr4B:657288602-657290831(+)	Nucellin-like aspartic protease	NA	NA
	TraesCS4B02G372400	chr4B:657295234-657309808(-)	Receptor-like protein kinase	NA	NA
	TraesCS4B02G372500	chr4B:657459383-657460566(+)	F-box domain containing protein	NA	NA
	TraesCS4B02G372600	chr4B:657466910-657474689(-)	Helicase, putative	NA	AT2G44980
	TraesCS4B02G372700	chr4B:657515589-657517678(+)	Zinc finger constans-like protein	NA	NA
	TraesCS4B02G372800	chr4B:657604534-657605937(-)	F-box family protein	NA	NA
	TraesCS4B02G372900	chr4B:657641226-657645429(-)	Disease resistance protein	NA	NA
	TraesCS4B02G373000	chr4B:657803763-657804353(-)	protein kinase family protein	NA	NA
	TraesCS4B02G373100	chr4B:657807972-657811408(+)	Cell number regulator 6	Os03g0101800	AT2G45010
	TraesCS4B02G373200	chr4B:657822221-657825980(+)	Phosphatidylserine decarboxylase proenzyme	Os03g0101900	AT4G16700
	TraesCS4B02G373300	chr4B:657827827-657828114(+)	B3 domain-containing protein family	NA	NA
	TraesCS4B02G373400	chr4B:657977741-657983272(+)	Coatomer subunit alpha	Os09g0127800	AT1G62020
	TraesCS4B02G373500	chr4B:657986736-657987231(-)	Transmembrane protein, putative	Os03g0102000	NA
	TraesCS4B02G373600	chr4B:657989337-657991890(+)	Methionyl-tRNA formyltransferase	Os03g0102100	AT4G17360
	TraesCS4B02G373700	chr4B:657991716-657993829(-)	auxin canalization protein (DUF828)	Os10g0560000	NA
	TraesCS4B02G373800	chr4B:658001951-658004404(+)	BTB/POZ domain containing protein, expressed	NA	NA
	TraesCS4B02G373900	chr4B:658020261-658020683(+)	BTB/POZ domain containing protein	NA	NA
	TraesCS4B02G374000	chr4B:658166283-658167487(+)	DNA-directed RNA polymerase subunit	Os03g0102200	AT3G16980
	TraesCS4B02G374100	chr4B:658167816-658169937(+)	NA	Os10g0558900	NA
	TraesCS4B02G374200	chr4B:658170193-658172005(+)	2-oxoglutarate (2OG) and Fe(II)-dependent oxygenase superfamily protein	Os10g0558900	NA
	TraesCS4B02G374300	chr4B:658172330-658174072(+)	2-oxoglutarate (2OG) and Fe(II)-dependent oxygenase superfamily protein	Os10g0558900	NA
	TraesCS4B02G374400	chr4B:658211040-658212993(+)	GATA transcription factor	Os10g0557600	AT2G45050
	TraesCS4B02G374500	chr4B:658518046-658521730(-)	Chaperone protein clpB	NA	NA
	TraesCS4B02G374600	chr4B:658612610-658613404(-)	Chaperone protein ClpB	NA	NA
	TraesCS4B02G374700	chr4B:658643585-658644379(-)	Chaperone protein ClpB	NA	NA
	TraesCS4B02G374800	chr4B:658771762-658782331(-)	ATP-dependent RNA helicase	Os08g0335000	AT1G32490
	TraesCS4B02G374900	chr4B:659002281-659003836(-)	GTP binding Elongation factor Tu family protein	NA	NA
	TraesCS4B02G375000	chr4B:659145664-659153680(+)	2-phosphoglycerate kinase, putative, expressed	Os03g0102400	AT5G61450
	TraesCS4B02G375100	chr4B:659154074-659173043(-)	CCR4-NOT transcription complex subunit 1	Os10g0556700	NA
	TraesCS4B02G375200	chr4B:659328881-659331319(-)	Expansin protein	Os10g0556100	AT2G45110
	TraesCS4B02G375300	chr4B:659481853-659485452(-)	Serine/threonine-protein kinase	Os08g0179000	NA
	TraesCS4B02G375400	chr4B:659497468-659501087(-)	Serine/threonine-protein kinase	Os08g0179000	NA
	TraesCS4B02G375500	chr4B:659512252-659513851(-)	Serine/threonine-protein kinase	NA	NA
	TraesCS4B02G375600	chr4B:659519951-659522073(+)	Expansin protein	Os03g0102700	AT2G45110
	TraesCS4B02G375700	chr4B:659534754-659535312(-)	Cysteine/Histidine-rich C1 domain family protein	NA	NA
	TraesCS4B02G375800	chr4B:659568934-659583635(+)	Nitrate transporter 1.1	Os10g0554200	AT1G12110
	TraesCS4B02G375900	chr4B:659583916-659590441(-)	Oxysterol-binding protein	Os10g0554100	AT2G31030
	TraesCS4B02G376000	chr4B:659664756-659666893(-)	Sodium transporter family protein	Os01g0307500	NA
	TraesCS4B02G376100	chr4B:659688184-659689650(-)	Gibberellin 2-beta-dioxygenase	Os04g0522500	NA
	TraesCS4B02G376200	chr4B:660089828-660092743(+)	Gibberellin 2-beta-dioxygenase	Os04g0522500	NA
	TraesCS4B02G376300	chr4B:660107651-660110569(-)	NA	Os03g0100900	AT4G17486
	TraesCS4B02G376400	chr4B:660114717-660121424(-)	Plasma membrane ATPase	Os03g0100800	AT5G62670
	TraesCS4B02G376500	chr4B:660139625-660140620(-)	PRA1 family protein	NA	NA
	TraesCS4B02G376600	chr4B:660145247-660146437(-)	Phosphoribosylformylglycinamidine synthase subunit PurL	NA	NA
	TraesCS4B02G376700	chr4B:660178745-660179270(-)	Germin-like protein	Os08g0189400	NA
	TraesCS4B02G376800	chr4B:660194860-660197570(-)	Serine/threonine-protein kinase	Os01g0669100	NA
	TraesCS4B02G376900	chr4B:660246865-660248029(-)	Germin-like protein	Os08g0189400	AT5G39150
	TraesCS4B02G377000	chr4B:660250774-660251831(-)	Germin-like protein	Os08g0189400	AT5G39110
	TraesCS4B02G377100	chr4B:660282551-660288669(-)	Germin-like protein	Os08g0189400	AT5G39110
	TraesCS4B02G377200	chr4B:660296048-660296863(-)	Germin-like protein	Os08g0189400	AT5G39110
	TraesCS4B02G377300	chr4B:660320575-660321389(-)	Germin-like protein	Os08g0189400	AT5G39110
	TraesCS4B02G377400	chr4B:660329220-660330034(-)	Germin-like protein	Os08g0189400	AT5G39110
	TraesCS4B02G377500	chr4B:660336167-660337205(-)	Germin-like protein	Os08g0189400	AT5G39110
	TraesCS4B02G377600	chr4B:660352578-660356106(+)	Phospholipase D	Os06g0604400	AT3G15730
	TraesCS4B02G377700	chr4B:660359043-660359579(+)	Germin-like protein	Os08g0189400	AT5G39150
	TraesCS4B02G377800	chr4B:660380996-660381817(-)	Germin-like protein	Os08g0189400	AT5G39110
	TraesCS4B02G377900	chr4B:660390379-660397845(-)	Germin-like protein	Os08g0189850	AT5G39110
	TraesCS4B02G378000	chr4B:660400748-660401763(-)	Germin-like protein	Os08g0189400	AT5G39110
	TraesCS4B02G378100	chr4B:660410375-660411496(-)	Germin-like protein	Os08g0189400	AT5G39110
	TraesCS4B02G378200	chr4B:660416108-660417267(-)	Germin-like protein	Os08g0189850	AT5G39110
	TraesCS4B02G378300	chr4B:660434454-660436292(-)	Germin-like protein	Os08g0189400	AT5G39110
	TraesCS4B02G378400	chr4B:660445454-660446575(-)	Germin-like protein	Os08g0189850	AT5G39110
	TraesCS4B02G378500	chr4B:660447217-660463829(-)	tRNA/rRNA methyltransferase family protein	Os03g0100500	NA
	TraesCS4B02G378700	chr4B:660464821-660469567(-)	DNA repair endonuclease UVH1	Os03g0100400	AT5G41150
	TraesCS4B02G378800	chr4B:660469673-660472270(-)	Peptidyl-prolyl cis-trans isomerase	Os03g0100300	NA
	TraesCS4B02G379000	chr4B:660494781-660495944(-)	Alkyl transferase	Os01g0857200	AT5G58770
	TraesCS4B02G379100	chr4B:660518550-660519802(+)	Protein FLOWERING LOCUS T	Os01g0748800	AT1G65480
	TraesCS4B02G379200	chr4B:660572882-660581373(+)	Calcineurin B-like protein	Os10g0564800	AT5G47100
	TraesCS4B02G379300	chr4B:660582267-660583286(+)	Casein kinase II subunit beta	Os10g0564900	AT2G44680
	TraesCS4B02G379500	chr4B:660588235-660589311(+)	Pterin-4-alpha-carbinolamine dehydratase, putative	Os03g0100200	NA
	TraesCS4B02G379600	chr4B:660589291-660590027(-)	Invertase inhibitor	NA	NA
	TraesCS4B02G379700	chr4B:660590206-660591393(-)	Phosphatidylinositol N-acetylglucosaminyltransferase subunit P	NA	AT1G61280
	TraesCS4B02G379800	chr4B:660591208-660595620(+)	NA	NA	NA
	TraesCS4B02G379900	chr4B:660594418-660595698(-)	Ribose-phosphate pyrophosphokinase	Os03g0100040	AT2G44530
	TraesCS4B02G380000	chr4B:660596274-660599227(-)	Protein NRT1/ PTR FAMILY 5.1	NA	NA
	TraesCS4B02G380100	chr4B:660652546-660654067(+)	C2 domain-containing family protein	Os07g0500300	NA
	TraesCS4B02G380200	chr4B:660655365-660657652(-)	CAAX protease self-immunity protein	Os03g0100030	AT2G35260
	TraesCS4B02G380300	chr4B:660661443-660665281(+)	glycosyltransferase family exostosin protein	Os03g0107900	AT5G22940
	TraesCS4B02G380400	chr4B:660665857-660668660(-)	Arsenate reductase	Os03g0108000	AT5G03455
	TraesCS4B02G380500	chr4B:660676241-660676976(-)	Protein FLOWERING LOCUS T	Os05g0518000	AT1G65480
	TraesCS4B02G380600	chr4B:660683396-660684953(-)	Protein FLOWERING LOCUS T	Os01g0748800	AT1G65480
	TraesCS4B02G380700	chr4B:660705120-660707282(-)	Trichome birefringence-like protein	Os06g0272850	NA
	TraesCS4B02G380800	chr4B:660722760-660729781(+)	ATP-dependent chaperone ClpB	Os03g0426900	AT5G15450
	TraesCS4B02G380900	chr4B:660874169-660880469(+)	RING/U-box superfamily protein	NA	NA
	TraesCS4B02G381000	chr4B:660904524-660910478(+)	RING-finger ubiquitin ligase	NA	NA
	TraesCS4B02G381100	chr4B:660929823-660936351(+)	RING/U-box superfamily protein	NA	NA
	TraesCS4B02G381200	chr4B:660940620-660944513(+)	Divalent metal cation transporter MntH	Os03g0700800	NA
	TraesCS4B02G381300	chr4B:661143306-661144856(+)	Carboxyl methyltransferase	Os02g0719600	NA
	TraesCS4B02G381400	chr4B:661150504-661151927(-)	Cortactin-binding protein 2	NA	NA
	TraesCS4B02G381500	chr4B:661168341-661171229(-)	Apyrase	Os12g0123500	NA
	TraesCS4B02G381600	chr4B:661185709-661191597(-)	Apyrase	Os12g0123500	NA
	TraesCS4B02G381700	chr4B:661256495-661257108(+)	Protein B602L	NA	NA
	TraesCS4B02G381800	chr4B:661304015-661306150(+)	Metacaspase-1	Os03g0388900	NA
	TraesCS4B02G381900	chr4B:661493212-661496488(+)	Protein phosphatase 2c, putative	NA	NA
	TraesCS4B02G382000	chr4B:661497661-661502048(-)	NA	NA	NA
	TraesCS4B02G382100	chr4B:661629550-661632795(-)	Leucine-rich repeat receptor-like protein kinase family protein	NA	NA
	TraesCS4B02G382200	chr4B:661641797-661642138(+)	Non-specific lipid-transfer protein	Os05g0477900	NA
	TraesCS4B02G382300	chr4B:661660140-661662090(-)	NA	NA	NA
	TraesCS4B02G382400	chr4B:661680808-661682247(-)	Phosphatase 2C family protein	Os03g0275100	AT1G07630
	TraesCS4B02G382500	chr4B:661682257-661683366(-)	Protein phosphatase 2C	NA	NA
	TraesCS4B02G382600	chr4B:662001216-662009974(+)	Disease resistance protein (NBS-LRR class) family	NA	NA
	TraesCS4B02G382700	chr4B:662144758-662148442(+)	NA	NA	NA
	TraesCS4B02G382800	chr4B:662156801-662157574(+)	Dirigent protein	NA	NA
	TraesCS4B02G382900	chr4B:662380840-662383186(-)	Vacuolar protein sorting-associated protein 2-like 1	Os03g0108400	AT5G22950
	TraesCS4B02G383000	chr4B:662401027-662402631(+)	Xyloglucan endotransglucosylase/hydrolase	Os03g0108300	AT2G36870
	TraesCS4B02G383100	chr4B:662419077-662421508(-)	Metacaspase-1	Os03g0388900	NA
	TraesCS4B02G383200	chr4B:662458013-662459004(-)	Heat shock transcription factor	NA	NA
	TraesCS4B02G383300	chr4B:662469975-662471090(-)	Heat shock transcription factor	NA	NA
	TraesCS4B02G383400	chr4B:662535668-662536833(-)	Heat shock transcription factor	NA	NA
	TraesCS4B02G383500	chr4B:662719273-662720079(-)	O-methyltransferase-like protein	NA	NA
	TraesCS4B02G383600	chr4B:662765456-662770670(+)	F-box family protein	NA	NA
	TraesCS4B02G383700	chr4B:663102554-663106891(+)	Benzyl alcohol O-benzoyltransferase	NA	NA
qSV6B.1	TraesCS6B02G345700	chr6B:609372737-609375415(+)	SNW domain-containing protein 1	Os02g0759800	AT1G77180
	TraesCS6B02G345800	chr6B:609379731-609383222(-)	Transport inhibitor response 1-like protein	Os02g0759700	AT5G49980
	TraesCS6B02G345900	chr6B:609841167-609846504(-)	Pentatricopeptide repeat-containing protein	Os02g0759500	AT1G73400
	TraesCS6B02G346000	chr6B:609854033-609855241(-)	E3 ubiquitin-protein ligase	Os02g0759400	AT4G09100
	TraesCS6B02G346100	chr6B:609886384-609888238(+)	Basic helix-loop-helix transcription factor	Os02g0759000	AT5G65320
	TraesCS6B02G346200	chr6B:609925034-609926074(+)	Blue copper protein	Os02g0758800	AT1G22480
	TraesCS6B02G346300	chr6B:610064940-610065673(+)	transcriptional factor B3 family protein	Os02g0758200	NA
	TraesCS6B02G346400	chr6B:610085279-610086236(+)	cyclin a2;1	Os02g0758200	AT5G65300
	TraesCS6B02G346500	chr6B:610233534-610241805(-)	LMBR1 domain-containing 2	Os02g0758100	AT5G65290
	TraesCS6B02G346600	chr6B:610804613-610807774(+)	Myb/SANT-like DNA-binding domain protein	NA	NA
	TraesCS6B02G346700	chr6B:610808586-610809673(-)	Heat-shock protein, putative	Os02g0758000	NA
	TraesCS6B02G346800	chr6B:610810130-610815679(+)	NA	Os02g0757900	AT5G10350
	TraesCS6B02G346900	chr6B:610816393-610817448(+)	NBS-LRR disease resistance protein	NA	NA
	TraesCS6B02G347000	chr6B:611347959-611349662(-)	F-box protein-like	Os02g0757700	AT4G08980
	TraesCS6B02G347100	chr6B:611460347-611461691(-)	Protein EXORDIUM-like 1	Os02g0757100	AT4G08950
	TraesCS6B02G347200	chr6B:611499966-611501337(+)	Protein EXORDIUM-like 1	Os02g0756800	AT4G08950
	TraesCS6B02G347300	chr6B:611504331-611505278(+)	Protein EXORDIUM-like 1	Os02g0756600	AT4G08950
	TraesCS6B02G347400	chr6B:611698227-611699819(+)	Protein EXORDIUM-like 1	Os02g0756200	AT4G08950
	TraesCS6B02G347500	chr6B:612133102-612134230(+)	EPIDERMAL PATTERNING FACTOR-like protein	Os02g0756100	AT5G10310
	TraesCS6B02G347600	chr6B:612197715-612198075(+)	Lipid transfer protein	NA	NA
	TraesCS6B02G347700	chr6B:612269780-612271572(-)	Glycosyltransferase	Os02g0755900	AT1G22360
	TraesCS6B02G347800	chr6B:612743089-612745301(-)	Glycosyltransferase	Os02g0755900	AT1G22400
	TraesCS6B02G347900	chr6B:612847863-612849777(+)	Glycosyltransferase	Os02g0755600	AT1G22360
	TraesCS6B02G348000	chr6B:612857305-612859019(+)	Glycosyltransferase	Os02g0755500	AT1G22370
	TraesCS6B02G348100	chr6B:612859070-612864954(-)	RNA-binding protein	Os02g0755400	AT1G22330
	TraesCS6B02G348200	chr6B:613108356-613111868(-)	Pterin-4-alpha-carbinolamine dehydratase	Os01g0663500	AT1G29810
	TraesCS6B02G348300	chr6B:613112037-613114907(+)	Lysine-specific histone demethylase 1-1-like protein	Os02g0755200	NA
	TraesCS6B02G348400	chr6B:613160278-613161225(-)	Maturase	BAC19891	ATMG00520
	TraesCS6B02G348500	chr6B:613162866-613163120(-)	Na(+)-translocating NADH-quinone reductase subunit F	NA	NA
	TraesCS6B02G348600	chr6B:613187455-613187823(-)	Orf101b	NA	NA
	TraesCS6B02G348700	chr6B:613291487-613298000(+)	S-adenosyl-L-methionine-dependent methyltransferases superfamily protein	Os02g0755000	AT1G78240
	TraesCS6B02G348800	chr6B:613298657-613301334(+)	NA	Os02g0754900	AT4G08930
	TraesCS6B02G348900	chr6B:613573348-613574806(-)	BTB/POZ domain protein	Os02g0754600	NA
	TraesCS6B02G349000	chr6B:613575218-613588354(-)	Glutamyl-tRNA(Gln) amidotransferase subunit A	Os02g0754500	AT5G09420
	TraesCS6B02G349100	chr6B:613610075-613611466(+)	Myb transcription factor	Os08g0433400	AT5G10280
	TraesCS6B02G349200	chr6B:614127307-614128893(+)	Myb transcription factor	Os08g0433400	AT5G10280
	TraesCS6B02G349300	chr6B:614130320-614133168(-)	50S ribosomal protein L29	Os02g0754300	NA
	TraesCS6B02G349400	chr6B:614305597-614310667(+)	DIS3-like exonuclease 2	Os02g0754100	NA
	TraesCS6B02G349500	chr6B:614311734-614313383(+)	Alpha-amylase	Os02g0765400	AT4G25000
	TraesCS6B02G349600	chr6B:614435764-614436219(-)	dicarboxylate transporter 1	NA	NA
	TraesCS6B02G349700	chr6B:614436986-614438709(+)	Alpha-amylase	Os02g0765400	AT4G25000
	TraesCS6B02G349800	chr6B:614582063-614583768(+)	Alpha-amylase	Os02g0765400	AT4G25000
	TraesCS6B02G349900	chr6B:615086071-615087667(-)	LRR and NB-ARC domains-containing disease resistance protein	NA	NA
	TraesCS6B02G350000	chr6B:615166995-615167808(+)	Ethylene-responsive transcription factor	Os02g0764700	NA
	TraesCS6B02G350100	chr6B:615230245-615231076(+)	Ethylene-responsive transcription factor	Os02g0764700	NA
	TraesCS6B02G350200	chr6B:615253158-615257586(+)	F-box domain containing protein-like	NA	NA
	TraesCS6B02G350300	chr6B:615318055-615323841(-)	Myb/SANT-like DNA-binding domain protein	NA	NA
	TraesCS6B02G350400	chr6B:615605331-615606561(+)	Ethylene-responsive transcription factor	Os02g0764700	NA
	TraesCS6B02G350500	chr6B:615636611-615638202(+)	Chlorophyll a-b binding protein, chloroplastic	Os02g0764500	AT1G45474
	TraesCS6B02G350600	chr6B:615638072-615641589(-)	Galactoside 2-alpha-L-fucosyltransferase	Os02g0764400	AT2G03220
	TraesCS6B02G350700	chr6B:615964852-615971424(+)	SprT-like domain-containing protein Spartan	NA	NA
	TraesCS6B02G350800	chr6B:615978204-615995724(-)	RNA polymerase-associated CTR9-like protein	Os07g0476200	NA
	TraesCS6B02G350900	chr6B:616323627-616326662(+)	Galactoside 2-alpha-L-fucosyltransferase	Os02g0763900	NA
	TraesCS6B02G351000	chr6B:616426337-616428825(-)	Galactoside 2-alpha-L-fucosyltransferase	Os02g0764200	NA
	TraesCS6B02G351100	chr6B:616429597-616430124(-)	Peroxidase	NA	NA
	TraesCS6B02G351200	chr6B:616432400-616449765(-)	Galactoside 2-alpha-L-fucosyltransferase	Os02g0763900	NA
	TraesCS6B02G351300	chr6B:616865947-616869408(+)	Galactoside 2-alpha-L-fucosyltransferase	Os02g0763200	NA
	TraesCS6B02G351400	chr6B:616944241-616946066(+)	Galactoside 2-alpha-L-fucosyltransferase	Os02g0763800	NA
	TraesCS6B02G351500	chr6B:617031092-617031991(+)	CAI-1 autoinducer sensor kinase/phosphatase cqsS isoform 1	NA	NA
	TraesCS6B02G351600	chr6B:617037929-617039659(+)	2-oxoglutarate (2OG) and Fe(II)-dependent oxygenase superfamily protein	Os06g0178500	NA
	TraesCS6B02G351700	chr6B:617112210-617113352(-)	Plant cadmium resistance 2	Os02g0763000	AT5G35525
	TraesCS6B02G351800	chr6B:617128423-617128713(+)	Calcium binding family protein	NA	NA
	TraesCS6B02G351900	chr6B:617170393-617183405(+)	DNA repair/recombination protein	Os02g0762800	AT3G19210
	TraesCS6B02G352000	chr6B:617184399-617185990(+)	membrane-associated kinase regulator-like protein	Os02g0762600	NA
	TraesCS6B02G352100	chr6B:617644498-617646161(-)	Cyclin-dependent kinase inhibitor	Os02g0762400	NA
	TraesCS6B02G352300	chr6B:617979561-617984238(-)	Phenylalanine--tRNA ligase alpha subunit	Os10g0400800	AT4G39280
	TraesCS6B02G352400	chr6B:618125158-618130610(+)	NA	Os02g0761700	AT4G37040
	TraesCS6B02G352500	chr6B:618131133-618137910(+)	Peptidyl-prolyl cis-trans isomerase	Os02g0761600	AT4G33380
	TraesCS6B02G352600	chr6B:618330421-618331395(-)	Receptor-like protein kinase	NA	NA
	TraesCS6B02G352700	chr6B:618332135-618337290(-)	Protein kinase family protein, putative, expressed	Os12g0562600	NA
	TraesCS6B02G352800	chr6B:618666635-618667500(+)	Oxidoreductase/transition metal ion-binding protein	Os02g0775300	NA
	TraesCS6B02G353000	chr6B:618935448-618935735(+)	B3 domain-containing protein family	NA	NA
	TraesCS6B02G353100	chr6B:618936336-618940080(+)	NA	Os02g0775200	AT1G77470
	TraesCS6B02G353200	chr6B:618942386-618945171(-)	NA	Os06g0215900	AT1G76690
	TraesCS6B02G353300	chr6B:619023716-619025809(-)	Metal tolerance protein	Os02g0775100	AT3G58060
	TraesCS6B02G353400	chr6B:619030620-619032741(-)	Glycosyltransferase family 92 protein	NA	NA
	TraesCS6B02G353500	chr6B:619404619-619405226(+)	transmembrane protein	Os02g0774200	NA
	TraesCS6B02G353600	chr6B:619483882-619484517(+)	Transmembrane protein, putative	Os02g0774200	NA
	TraesCS6B02G353700	chr6B:619492681-619494113(-)	Thioredoxin	Os02g0774100	NA
	TraesCS6B02G353800	chr6B:619525687-619529993(+)	Protein trichome birefringence	Os02g0773732	NA
	TraesCS6B02G353900	chr6B:619719219-619721667(+)	Growth-regulating factor	Os02g0773600	NA
	TraesCS6B02G354000	chr6B:619728551-619729642(+)	Temperature-induced lipocalin	Os08g0440100	AT5G58070
	TraesCS6B02G354100	chr6B:619861244-619862517(+)	Protein PAM68, chloroplastic-like protein	Os02g0773500	NA
	TraesCS6B02G354200	chr6B:620174465-620184681(-)	NA	Os02g0773400	NA
	TraesCS6B02G354300	chr6B:620261047-620264596(+)	1-aminocyclopropane-1-carboxylate deaminase/D-cysteine desulfhydrase	Os02g0773300	AT1G48420
	TraesCS6B02G354400	chr6B:620264708-620265976(-)	Universal stress protein family protein	Os02g0773200	AT3G53990
	TraesCS6B02G354500	chr6B:620281211-620284081(-)	Cytochrome P450, putative	NA	NA
	TraesCS6B02G354600	chr6B:620707011-620710511(-)	Peroxidase	Os01g0378100	NA
	TraesCS6B02G354700	chr6B:622725092-622727408(+)	Protein XRI1	NA	NA
	TraesCS6B02G354800	chr6B:622729856-622739265(-)	UPF0614 C14orf102-like protein	Os02g0772500	NA
	TraesCS6B02G354900	chr6B:623080774-623084880(-)	NA	Os06g0208100	AT1G73360
	TraesCS6B02G355000	chr6B:623368982-623369821(+)	Embryogenesis-associated protein EMB8	NA	NA
	TraesCS6B02G355200	chr6B:623445433-623446316(+)	Disease-resistance protein RAR1	NA	NA
	TraesCS6B02G355300	chr6B:623442845-623448995(-)	N-acetyltransferase	Os02g0772300	NA
	TraesCS6B02G355400	chr6B:623689954-623696879(-)	Transcription elongation factor SPT5	Os02g0772000	AT4G08350
	TraesCS6B02G355500	chr6B:623724865-623730551(+)	NA	Os02g0771800	NA
	TraesCS6B02G355600	chr6B:623739703-623742959(+)	Glucan endo-1,3-beta-glucosidase 3	Os02g0771700	AT2G05790
	TraesCS6B02G355700	chr6B:624017273-624019350(-)	1-aminocyclopropane-1-carboxylate oxidase	Os02g0771600	AT1G05010
	TraesCS6B02G355800	chr6B:624177393-624178922(-)	1-aminocyclopropane-1-carboxylate oxidase	Os02g0771600	AT1G05010
	TraesCS6B02G355900	chr6B:624311966-624313762(-)	1-aminocyclopropane-1-carboxylate oxidase	Os02g0771600	AT1G05010
	TraesCS6B02G356000	chr6B:624402309-624409704(-)	1-aminocyclopropane-1-carboxylate oxidase	Os02g0771600	AT1G05010
	TraesCS6B02G356200	chr6B:624495761-624497229(-)	1-aminocyclopropane-1-carboxylate oxidase	Os02g0771600	AT1G05010
	TraesCS6B02G356300	chr6B:624785937-624787558(+)	DNA-binding storekeeper protein-related transcriptional regulator	Os02g0771200	NA
	TraesCS6B02G356400	chr6B:624795560-624801969(+)	E3 ubiquitin-protein ligase COP1	Os02g0771100	AT2G32950
	TraesCS6B02G356500	chr6B:624802610-624803729(-)	P-type ATP-ase 1	NA	NA
	TraesCS6B02G356600	chr6B:624860399-624866402(-)	Reticulon-like protein	NA	NA
	TraesCS6B02G356700	chr6B:624882519-624883465(-)	Pimeloyl-[acyl-carrier protein] methyl ester esterase	NA	NA
	TraesCS6B02G356800	chr6B:625241370-625244779(+)	Nitrate reductase	Os02g0770800	AT1G77760
	TraesCS6B02G356900	chr6B:625365345-625378820(+)	Separase, putative	Os02g0770700	NA
	TraesCS6B02G357000	chr6B:625379434-625381386(-)	zinc finger/BTB domain protein, putative (DUF1644)	Os02g0770600	AT4G08460
	TraesCS6B02G357100	chr6B:625536808-625537254(-)	30S ribosomal protein S7, putative	BAC19857	AT2G07696
	TraesCS6B02G357200	chr6B:625615895-625616122(-)	NAD(P)H-quinone oxidoreductase subunit 2, chloroplastic	CAA33920	NA
	TraesCS6B02G357300	chr6B:625616422-625616802(-)	30S ribosomal protein S7	CAA33919	ATCG00900
	TraesCS6B02G357400	chr6B:625649936-625650760(+)	Cytochrome c biogenesis Fc	BAC19894	ATMG00180
	TraesCS6B02G357500	chr6B:625652165-625652464(-)	early nodulin-like protein 10	NA	NA
	TraesCS6B02G357600	chr6B:625778598-625781138(-)	WRKY transcription factor, putative	Os02g0770500	NA
	TraesCS6B02G357700	chr6B:625884650-625885787(-)	Myb family transcription factor family protein	NA	NA
	TraesCS6B02G357800	chr6B:625886934-625891359(-)	Short-chain dehydrogenase/reductase family protein	Os03g0654600	AT5G04900
	TraesCS6B02G357900	chr6B:626212094-626216999(+)	26S proteasome non-atpase regulatory subunit, putative	Os07g0435100	AT1G64520
	TraesCS6B02G358000	chr6B:626450360-626454459(+)	NA	Os02g0770100	NA
	TraesCS6B02G358100	chr6B:626456415-626458167(-)	Pentatricopeptide repeat-containing protein	Os02g0769900	NA
	TraesCS6B02G358300	chr6B:626488227-626525215(-)	Glycosyltransferase	Os05g0527200	NA
	TraesCS6B02G358400	chr6B:626589140-626590604(-)	Pentatricopeptide repeat-containing protein	Os02g0769900	NA
	TraesCS6B02G358600	chr6B:626811889-626813569(+)	Pentatricopeptide repeat-containing protein	Os02g0769900	NA
	TraesCS6B02G358700	chr6B:626882497-626883963(+)	Pentatricopeptide repeat-containing protein	Os02g0769900	NA
	TraesCS6B02G358800	chr6B:626886420-626892443(-)	Protein kinase	Os02g0769800	AT4G08500
	TraesCS6B02G358900	chr6B:630465584-630465913(-)	Chaperone protein dnaJ-like protein	Os02g0506600	NA
	TraesCS6B02G359000	chr6B:630504675-630504998(-)	Chaperone dnaJ-like protein	Os02g0506600	NA
	TraesCS6B02G359100	chr6B:630529246-630529557(-)	Chaperone dnaJ-like protein	Os02g0506600	NA
	TraesCS6B02G359200	chr6B:630540268-630541165(+)	Kinesin heavy chain, putative isoform 1	NA	NA
	TraesCS6B02G359300	chr6B:630846675-630849877(+)	LysM domain-containing GPI-anchored protein 1	Os02g0769200	AT1G21880
	TraesCS6B02G359400	chr6B:631193221-631194157(+)	Auxin-responsive family protein	Os02g0769100	NA
	TraesCS6B02G359500	chr6B:631200466-631203676(-)	LysM domain-containing GPI-anchored protein 1	Os02g0769200	AT1G21880
	TraesCS6B02G359600	chr6B:631245209-631246198(-)	Auxin-responsive family protein	Os02g0769100	NA
	TraesCS6B02G359700	chr6B:631534462-631534815(-)	SAUR-like auxin-responsive family protein	Os02g0769100	NA
	TraesCS6B02G359800	chr6B:631740171-631741196(-)	Auxin-responsive family protein	Os02g0769100	NA
	TraesCS6B02G359900	chr6B:631843546-631843908(-)	Auxin-responsive family protein	Os02g0769100	NA
	TraesCS6B02G360000	chr6B:631950723-631967302(-)	NA	Os02g0768800	NA
	TraesCS6B02G360100	chr6B:632176561-632179355(+)	DNA-binding storekeeper protein-related transcriptional regulator, putative	Os02g0768700	NA
	TraesCS6B02G360200	chr6B:632179674-632182484(-)	Ethylene receptor	NA	NA
	TraesCS6B02G360300	chr6B:632182793-632188473(-)	Inorganic pyrophosphatase	Os02g0768600	AT5G09650
	TraesCS6B02G360400	chr6B:632241128-632244382(+)	WAT1-related protein	Os02g0768300	AT4G08300
	TraesCS6B02G360500	chr6B:632304665-632305774(+)	WAT1-related protein	Os02g0768300	AT4G08300
	TraesCS6B02G360600	chr6B:632419861-632423528(+)	WAT1-related protein	Os02g0768300	AT4G08300
	TraesCS6B02G360700	chr6B:632502656-632504809(+)	WAT1-related protein	Os02g0768300	AT4G08290
	TraesCS6B02G360800	chr6B:632563923-632566684(+)	WAT1-related protein	Os02g0768300	AT4G08300
	TraesCS6B02G360900	chr6B:632786075-632788585(+)	WAT1-related protein	Os02g0768300	AT4G08300
	TraesCS6B02G361000	chr6B:632848627-632851095(+)	Transmembrane emp24 domain-containing protein	Os02g0768200	AT1G21900
	TraesCS6B02G361100	chr6B:632878151-632880112(+)	Hydroxyproline-rich glycoprotein family protein, putative	Os02g0768000	NA
	TraesCS6B02G361200	chr6B:632881153-632882406(-)	Glutaredoxin-like protein	Os02g0767900	AT4G08280
	TraesCS6B02G361300	chr6B:632882579-632885952(+)	Transcription factor TFIIIB component B	NA	NA
	TraesCS6B02G361400	chr6B:632954631-632955979(+)	Ethylene-responsive transcription factor	Os02g0767800	AT1G21910
	TraesCS6B02G361500	chr6B:632961967-632966487(+)	NA	Os02g0767700	NA
	TraesCS6B02G361600	chr6B:632966867-632968058(-)	RING/U-box superfamily protein, putative	Os02g0767600	AT1G21960
	TraesCS6B02G361700	chr6B:633054625-633057928(-)	Protein COBRA	NA	NA
	TraesCS6B02G361800	chr6B:633532903-633536879(+)	Phosphate carrier protein, mitochondrial	Os02g0767500	AT5G14040
	TraesCS6B02G361900	chr6B:633547666-633550347(+)	Serine/threonine-protein kinase	Os02g0767400	NA
	TraesCS6B02G362000	chr6B:633730596-633732366(+)	Glycosyltransferase	Os02g0755900	AT1G22400
	TraesCS6B02G362100	chr6B:633858539-633859821(+)	Flavonol synthase	Os02g0767300	AT5G08640
	TraesCS6B02G362200	chr6B:633896583-633898132(-)	Superoxide dismutase [Cu-Zn]	NA	NA
	TraesCS6B02G362300	chr6B:633903843-633907796(-)	Cyclin-like protein	Os01g0377500	AT2G26430
	TraesCS6B02G362400	chr6B:633910122-633915630(+)	NA	Os03g0363500	AT5G18840
	TraesCS6B02G362500	chr6B:633915826-633917188(-)	zinc/iron-chelating domain protein	Os03g0363400	NA
	TraesCS6B02G362600	chr6B:633918025-633923526(-)	3-oxoacyl-[acyl-carrier-protein] synthase-like protein	Os03g0363200	AT5G04520
	TraesCS6B02G362700	chr6B:634043817-634046937(+)	NA	Os03g0362200	NA
	TraesCS6B02G362800	chr6B:634046893-634049669(-)	NA	Os03g0360700	AT4G21860
	TraesCS6B02G362900	chr6B:634306279-634309938(+)	Lipase	Os02g0767200	AT1G45201
	TraesCS6B02G363000	chr6B:634321918-634322503(+)	Pathogenesis-related protein PR-4	NA	AT3G04720
	TraesCS6B02G363100	chr6B:634330005-634330533(+)	Pathogenesis-related protein PR-4	NA	AT3G04720
	TraesCS6B02G363200	chr6B:634330858-634335883(-)	THO complex subunit 5	Os02g0767100	AT1G45233
	TraesCS6B02G363300	chr6B:634501638-634502222(+)	Ripening-related protein	NA	NA
	TraesCS6B02G363400	chr6B:634502882-634503969(-)	Signal peptidase I	NA	NA
	TraesCS6B02G363500	chr6B:634568594-634580495(+)	Neuroblastoma-amplified sequence	NA	NA
	TraesCS6B02G363600	chr6B:634611394-634616763(+)	Remorin	Os02g0767000	AT1G45207
	TraesCS6B02G363700	chr6B:634639596-634642685(+)	Mannan endo-1,4-beta-mannosidase 4	Os02g0766900	NA
	TraesCS6B02G363800	chr6B:634939897-634942944(+)	Mannan endo-1,4-beta-mannosidase 4	Os02g0766900	AT5G66460
	TraesCS6B02G363900	chr6B:634976669-634979612(+)	Mannan endo-1,4-beta-mannosidase 4	Os02g0766900	AT5G66460
	TraesCS6B02G364000	chr6B:635168431-635172842(+)	BZIP transcription factor	Os02g0766700	AT1G45249
	TraesCS6B02G364100	chr6B:635175281-635176620(-)	DUF1685 family protein	Os02g0766600	NA
	TraesCS6B02G364200	chr6B:635274725-635281114(-)	Ankyrin repeat family protein	NA	NA
	TraesCS6B02G364300	chr6B:636185525-636187768(+)	ATP-dependent RNA helicase	Os03g0708600	AT1G28180
	TraesCS6B02G364400	chr6B:636211913-636214217(+)	ATP-dependent RNA helicase	Os03g0708600	AT1G28180
	TraesCS6B02G364500	chr6B:636381721-636385272(+)	DNA-directed RNA polymerase subunit	Os02g0766000	AT1G45230
	TraesCS6B02G364600	chr6B:636392631-636397024(+)	Nitrite reductase	Os02g0765900	AT2G15620
qSV6D.1	TraesCS6D02G330200	chr6D:433641519-433642274(+)	Flavin-binding monooxygenase family protein	NA	NA
	TraesCS6D02G330300	chr6D:433645630-433646507(+)	Translation initiation factor IF-2	NA	NA
	TraesCS6D02G330400	chr6D:433696030-433696812(-)	NFX1-type zinc finger-containing protein 1	NA	NA
	TraesCS6D02G330500	chr6D:433708698-433715343(-)	Glutamate receptor	Os02g0787600	NA
	TraesCS6D02G330600	chr6D:433765233-433768001(-)	Protein FLX-like 1	Os04g0479100	NA
	TraesCS6D02G330700	chr6D:433897058-433902710(+)	Cycloeucalenol cycloisomerase	NA	AT5G50375
	TraesCS6D02G330800	chr6D:433929693-433936738(+)	Diacylglycerol kinase	Os02g0787800	AT2G18730
	TraesCS6D02G330900	chr6D:433936980-433942791(-)	Glutamate receptor	Os02g0787600	NA
	TraesCS6D02G331000	chr6D:434017477-434020605(+)	Eukaryotic translation initiation factor 3 subunit G	Os02g0788400	AT3G11400
	TraesCS6D02G331100	chr6D:434020787-434022596(-)	F-box protein SKIP8	Os02g0788500	NA
	TraesCS6D02G331200	chr6D:434140386-434143779(-)	Chaperone protein clpB	Os02g0788600	NA
	TraesCS6D02G331300	chr6D:434169366-434173088(-)	Amino acid transporter family protein	Os02g0788800	AT2G41190
	TraesCS6D02G331400	chr6D:434252973-434257762(-)	NA	Os02g0788800	AT2G41190
	TraesCS6D02G331500	chr6D:434402729-434407455(+)	Lysine--tRNA ligase	NA	NA
	TraesCS6D02G331600	chr6D:434440915-434442870(+)	NA	Os08g0205200	AT1G70330
	TraesCS6D02G331700	chr6D:434450430-434454809(-)	Cyclic nucleotide-gated channel	Os02g0789100	AT4G30360
	TraesCS6D02G331800	chr6D:434460014-434464075(-)	TVP38/TMEM64 family membrane protein	Os03g0374400	AT2G02370
	TraesCS6D02G331900	chr6D:434467990-434478494(-)	Cyclic nucleotide-gated channel	Os02g0789100	AT4G30360
	TraesCS6D02G332000	chr6D:434482186-434485928(-)	Arginine/serine-rich splicing factor, putative	Os02g0789400	NA
	TraesCS6D02G332100	chr6D:434507902-434512189(+)	Cyclin family protein	Os09g0504400	AT5G48640
	TraesCS6D02G332200	chr6D:434512436-434516017(-)	RING/U-box superfamily protein	NA	NA
	TraesCS6D02G332300	chr6D:434604263-434605238(+)	Late embryogenesis abundant (LEA) hydroxyproline-rich glycoprotein family	NA	NA
	TraesCS6D02G332400	chr6D:434786695-434789883(+)	Protein CYPRO4	Os02g0789600	AT3G19240
	TraesCS6D02G332500	chr6D:434811674-434812738(+)	Dehydrin	NA	NA
	TraesCS6D02G332600	chr6D:435012400-435012681(+)	Dehydrin	NA	NA
	TraesCS6D02G332700	chr6D:435072895-435075633(+)	Dehydrin	NA	NA
	TraesCS6D02G332800	chr6D:435300309-435308407(+)	Protein DETOXIFICATION	Os07g0502200	AT3G23560
	TraesCS6D02G332900	chr6D:435351033-435352218(+)	NA	NA	NA
	TraesCS6D02G333000	chr6D:435711668-435712623(+)	Dehydrin	NA	NA
	TraesCS6D02G333100	chr6D:435749803-435750719(+)	Dehydrin	NA	NA
	TraesCS6D02G333200	chr6D:435763700-435764598(+)	Dehydrin	NA	NA
	TraesCS6D02G333300	chr6D:435831506-435832386(-)	Dehydrin	NA	NA
	TraesCS6D02G333400	chr6D:435905243-435907228(-)	F-box protein family	NA	NA
	TraesCS6D02G333500	chr6D:435944107-435948027(+)	Pectinesterase	Os02g0783000	NA
	TraesCS6D02G333600	chr6D:435962275-435963310(-)	Dehydrin	NA	NA
	TraesCS6D02G333700	chr6D:435970617-435973895(+)	Receptor-kinase, putative	Os02g0777400	NA
	TraesCS6D02G333800	chr6D:436073808-436077481(+)	Leucine-rich repeat receptor-like protein kinase family protein	NA	NA
	TraesCS6D02G333900	chr6D:436090919-436095234(+)	Leucine-rich repeat receptor-like protein kinase family protein	NA	NA
	TraesCS6D02G334000	chr6D:436221659-436225654(-)	NA	Os02g0790500	AT2G18700
	TraesCS6D02G334100	chr6D:436344553-436344888(+)	Stigma-specific Stig1 family protein	NA	NA
	TraesCS6D02G334200	chr6D:436373616-436374452(+)	Jojoba acyl CoA reductase-related male sterility protein	NA	NA
	TraesCS6D02G334300	chr6D:436421023-436422430(+)	Protein pelota homolog	NA	AT4G27650
	TraesCS6D02G334400	chr6D:436456926-436466320(-)	NA	Os07g0486100	NA
	TraesCS6D02G334500	chr6D:436473875-436474177(-)	Protein pelota homolog	Os04g0659900	AT4G27650
	TraesCS6D02G334600	chr6D:436493931-436496546(+)	NA	NA	NA
	TraesCS6D02G334700	chr6D:436543788-436544897(-)	Serine/threonine protein phosphatase 7 long form isogeny	NA	NA
	TraesCS6D02G334800	chr6D:436638172-436639652(+)	Protein pelota homolog	NA	AT4G27650
	TraesCS6D02G334900	chr6D:436715643-436716974(-)	RING finger protein	Os02g0790600	AT4G30400
	TraesCS6D02G335000	chr6D:436733171-436737059(+)	NA	Os02g0791200	AT5G57740
	TraesCS6D02G335100	chr6D:436757730-436758317(+)	U4/U6.U5 small nuclear ribonucleoprotein 27 kDa protein	NA	NA
	TraesCS6D02G335200	chr6D:436762608-436762952(-)	arginine N-methyltransferase, putative (DUF688)	NA	NA
	TraesCS6D02G335300	chr6D:436764829-436766844(-)	Lectin receptor kinase	Os02g0777400	AT4G30520
	TraesCS6D02G335400	chr6D:436770030-436772078(+)	Lectin receptor kinase	Os02g0777400	AT4G30520
	TraesCS6D02G335500	chr6D:436798615-436799504(+)	BHLH transcription factor	Os02g0791300	AT4G30410
	TraesCS6D02G335600	chr6D:436832068-436834195(+)	UDP-glucuronate 4-epimerase 4	Os02g0791500	AT4G30440
	TraesCS6D02G335700	chr6D:436860476-436863325(+)	F-box protein	NA	NA
	TraesCS6D02G335800	chr6D:436870500-436887069(+)	Kinase	Os02g0791700	AT4G30960
	TraesCS6D02G335900	chr6D:436887329-436890971(-)	Autophagy-related protein 18	Os02g0791800	AT4G30510
	TraesCS6D02G336000	chr6D:437163550-437165751(+)	Pheophorbide a oxygenase, chloroplastic	Os02g0792800	AT2G24820
	TraesCS6D02G336100	chr6D:437165832-437169311(-)	NA	Os02g0792900	AT1G16180
	TraesCS6D02G336200	chr6D:437176213-437180104(-)	Zinc finger CCCH-type with G patch domain protein	Os02g0793000	NA
	TraesCS6D02G336300	chr6D:437197901-437198869(+)	F-box SKIP23-like protein (DUF295)	NA	NA
	TraesCS6D02G336400	chr6D:437281195-437290533(+)	NA	Os02g0793300	AT1G79690
	TraesCS6D02G336500	chr6D:437324480-437341505(-)	Vacuolar protein-sorting protein 33	Os04g0223000	AT3G54860
	TraesCS6D02G336600	chr6D:437402279-437413487(+)	D-lactate dehydrogenase, putative	Os07g0163000	AT5G06580
	TraesCS6D02G336700	chr6D:437426104-437427489(-)	Tetratricopeptide repeat (TPR)-like superfamily protein	NA	NA
	TraesCS6D02G336800	chr6D:437676518-437686848(-)	Clustered mitochondria protein	NA	NA
	TraesCS6D02G336900	chr6D:437772775-437773816(+)	Membrane steroid-binding protein	Os02g0793700	AT2G24940
	TraesCS6D02G337000	chr6D:437781709-437786900(-)	Embryogenesis transmembrane protein-like	Os12g0141000	NA
	TraesCS6D02G337100	chr6D:437803062-437806250(+)	NA	Os02g0793800	AT4G30780
	TraesCS6D02G337200	chr6D:437806754-437810667(-)	Snf1-related kinase interactor 1, putative	Os02g0793900	NA
	TraesCS6D02G337300	chr6D:437814435-437817957(-)	RING/U-box superfamily protein	Os02g0794000	NA
	TraesCS6D02G337400	chr6D:437944539-437951327(+)	QWRF motif protein (DUF566)	Os02g0794300	AT4G30710
	TraesCS6D02G337500	chr6D:437952535-437957312(-)	Translation initiation factor IF-3	Os02g0794400	AT4G30690
	TraesCS6D02G337600	chr6D:437957948-437959948(+)	CsAtPR5	NA	NA
	TraesCS6D02G337700	chr6D:438274335-438286317(+)	Myosin heavy chain-like protein, putative	NA	NA
	TraesCS6D02G337800	chr6D:438298955-438300857(-)	WEB family protein, chloroplastic	NA	NA
	TraesCS6D02G337900	chr6D:438304237-438310273(-)	Protein phosphatase 2C	Os02g0799000	NA
	TraesCS6D02G338000	chr6D:438344877-438345920(+)	Phosphoribosylformylglycinamidine cyclo-ligase	NA	NA
	TraesCS6D02G338100	chr6D:438443404-438444546(-)	Extracellular matrix-binding protein ebh	NA	NA
	TraesCS6D02G338200	chr6D:438456804-438457900(+)	F-box family protein	Os02g0793500	NA
	TraesCS6D02G338300	chr6D:438457948-438458509(+)	F-box/FBD-like domains containing protein	NA	NA
	TraesCS6D02G338400	chr6D:438460817-438461083(+)	Cytochrome c oxidase copper chaperone	Os02g0794600	AT1G53030
	TraesCS6D02G338500	chr6D:438528073-438528827(-)	40S ribosomal protein	Os01g0250600	AT1G57540
	TraesCS6D02G338600	chr6D:438805104-438805334(+)	Cytochrome c oxidase copper chaperone	Os02g0794600	AT1G53030
	TraesCS6D02G338700	chr6D:438805622-438810991(-)	Carboxypeptidase	Os02g0794500	AT4G30610
	TraesCS6D02G338800	chr6D:438829879-438831604(+)	Anthocyanin 5-aromatic acyltransferase-like protein	Os07g0414000	NA
	TraesCS6D02G338900	chr6D:438836102-438839565(-)	Disease resistance protein (NBS-LRR class) family	NA	NA
	TraesCS6D02G339000	chr6D:438861293-438861658(-)	RNA polymerase Rpb7-like, N-terminal domain	NA	NA
	TraesCS6D02G339100	chr6D:438883083-438885643(+)	Purple acid phosphatase	Os12g0637200	AT2G16430
	TraesCS6D02G339200	chr6D:438891058-438895242(-)	Leucine aminopeptidase, putative	Os02g0794700	AT2G24200
	TraesCS6D02G339300	chr6D:438896104-438908215(-)	Formin-like protein	Os02g0794900	AT3G32400
	TraesCS6D02G339400	chr6D:438913083-438924112(+)	C2 domain-containing protein / GRAM domain-containing protein	Os09g0516900	AT3G59660
	TraesCS6D02G339500	chr6D:438929255-438935176(+)	Ubiquitin carboxyl-terminal hydrolase, putative	Os02g0795000	AT4G30890
	TraesCS6D02G339600	chr6D:438942402-438946634(-)	70 kDa heat shock protein	Os02g0815900	AT4G30520
	TraesCS6D02G339700	chr6D:438965041-438967274(-)	70 kDa heat shock protein	NA	AT3G12580
	TraesCS6D02G339800	chr6D:438971020-438974027(+)	NA	NA	NA
	TraesCS6D02G339900	chr6D:439509534-439510826(-)	F-box family protein	NA	NA
	TraesCS6D02G340000	chr6D:439600031-439601068(-)	F-box domain containing protein	NA	NA
	TraesCS6D02G340100	chr6D:439613349-439614359(-)	F-box family protein	NA	NA
	TraesCS6D02G340200	chr6D:439616425-439619143(+)	carboxyl-terminal peptidase, putative (DUF239)	Os02g0792500	NA
	TraesCS6D02G340300	chr6D:439619128-439620879(-)	Protein POLAR LOCALIZATION DURING ASYMMETRIC DIVISION AND REDISTRIBUTION	Os02g0795200	AT4G31805
	TraesCS6D02G340400	chr6D:439655415-439657078(+)	Protein POLAR LOCALIZATION DURING ASYMMETRIC DIVISION AND REDISTRIBUTION	Os02g0795200	AT4G31805
	TraesCS6D02G340500	chr6D:439659401-439662136(-)	carboxyl-terminal peptidase, putative (DUF239)	Os02g0792500	NA
	TraesCS6D02G340600	chr6D:439795718-439798289(-)	carboxyl-terminal peptidase, putative (DUF239)	Os02g0792500	NA
	TraesCS6D02G340700	chr6D:439805570-439808861(+)	Photosystem II 10 kDa polypeptide	Os08g0200300	AT1G79040
	TraesCS6D02G340800	chr6D:439920117-439923036(-)	FBD-associated F-box protein	Os02g0793500	NA
	TraesCS6D02G340900	chr6D:440013443-440015528(-)	FBD-associated F-box protein	Os02g0793500	NA
	TraesCS6D02G341000	chr6D:440208812-440211336(-)	F-box/RNI-like/FBD-like domains-containing protein	Os02g0793500	NA
	TraesCS6D02G341100	chr6D:440219247-440221225(-)	F-box/FBD-like domains containing protein	Os02g0793500	NA
	TraesCS6D02G341200	chr6D:440363517-440367371(+)	Basic helix-loop-helix transcription factor	Os02g0795800	AT4G30980
	TraesCS6D02G341300	chr6D:440367778-440371775(-)	ATP-dependent RNA helicase DeaD	Os02g0795900	AT4G15850
	TraesCS6D02G341400	chr6D:440381263-440384005(+)	Pentatricopeptide repeat-containing protein	Os02g0796400	AT4G31850
	TraesCS6D02G341500	chr6D:440657108-440664394(-)	CCR4-NOT transcription complex family protein	Os02g0796300	AT2G32070
	TraesCS6D02G341600	chr6D:440673614-440675169(+)	Glutamate dehydrogenase	NA	NA
	TraesCS6D02G341700	chr6D:441291375-441292100(+)	AGAMOUS-like MADS-box protein	NA	NA
	TraesCS6D02G341800	chr6D:441316863-441318410(+)	AGAMOUS-like MADS-box protein	NA	NA
	TraesCS6D02G341900	chr6D:441318455-441320111(+)	Cortactin-binding protein 2	NA	NA
	TraesCS6D02G342000	chr6D:441397725-441398450(+)	AGAMOUS-like MADS-box protein	NA	NA
	TraesCS6D02G342100	chr6D:441525814-441526599(+)	MADS-box transcription factor family protein	NA	NA
qSV6D.2	TraesCS6D02G391000	chr6D:466129789-466131198(-)	F-box family protein	Os02g0825500	NA
	TraesCS6D02G391100	chr6D:466265476-466268066(+)	F-box family protein	Os02g0825301	NA
	TraesCS6D02G391200	chr6D:466268414-466272093(-)	Hepatocellular carcinoma-associated antigen 59 family protein, expressed	Os03g0374100	AT1G02330
	TraesCS6D02G391300	chr6D:466328445-466331387(+)	F-box family protein	Os02g0826675	NA
	TraesCS6D02G391500	chr6D:466526775-466528278(-)	F-box/RNI-like superfamily protein	Os02g0826675	NA
	TraesCS6D02G391700	chr6D:466544617-466545658(+)	OSBP(oxysterol binding protein)-related protein 4C	Os02g0826675	NA
	TraesCS6D02G391800	chr6D:466549961-466552817(-)	F-box/RNI-like/FBD-like domains-containing protein	Os02g0826675	NA
	TraesCS6D02G391900	chr6D:466621832-466624063(+)	F-box family protein	Os02g0826675	NA
	TraesCS6D02G392000	chr6D:466734600-466739606(-)	Acetate kinase	NA	NA
	TraesCS6D02G392100	chr6D:466907866-466909390(-)	Xyloglucan endotransglucosylase/hydrolase	Os08g0237000	NA
	TraesCS6D02G392200	chr6D:466935871-466937543(-)	NBS-LRR-like resistance protein	NA	NA
	TraesCS6D02G392300	chr6D:466943538-466944867(+)	Photosystem II 22 kDa, chloroplastic	Os05g0292800	AT5G02120
	TraesCS6D02G392400	chr6D:466999116-466999490(+)	F-box domain containing protein, expressed	NA	NA
	TraesCS6D02G392500	chr6D:467007359-467009611(-)	Kinase, putative	Os02g0833000	NA
	TraesCS6D02G392600	chr6D:467010060-467011685(+)	Receptor lectin kinase	Os02g0833000	NA
	TraesCS6D02G392700	chr6D:467030905-467036481(-)	ATP-dependent RNA helicase	Os02g0826100	AT5G08620
	TraesCS6D02G392800	chr6D:467036757-467040288(+)	ADP-L-glycero-D-manno-heptose-6-epimerase	Os02g0826200	AT4G00560
	TraesCS6D02G392900	chr6D:467040765-467049925(+)	NA	Os04g0689700	NA
	TraesCS6D02G393000	chr6D:467042356-467043023(+)	CLAVATA3/ESR (CLE)-related protein 2	Os02g0826300	NA
	TraesCS6D02G393100	chr6D:467078824-467085044(+)	NA	NA	NA
	TraesCS6D02G393200	chr6D:467093084-467097237(-)	Electron transfer flavoprotein beta-subunit	Os04g0182800	AT5G43430
	TraesCS6D02G393300	chr6D:467187916-467194390(-)	Leucine-rich repeat receptor-like protein kinase family protein, putative	Os02g0826600	AT3G15410
	TraesCS6D02G393400	chr6D:467200683-467201522(-)	Aldolase superfamily protein	NA	NA
	TraesCS6D02G393500	chr6D:467303229-467306974(+)	Prolyl 4-hydroxylase alpha subunit, putative	Os02g0827100	AT1G20270
	TraesCS6D02G393600	chr6D:467313021-467318437(+)	Sucrose transporter	Os02g0827200	AT2G02860
	TraesCS6D02G393700	chr6D:467318550-467320007(-)	BAG family molecular chaperone regulator 5	NA	NA
	TraesCS6D02G393800	chr6D:467545182-467547534(-)	BAG family molecular chaperone regulator 5	NA	NA
	TraesCS6D02G393900	chr6D:467772217-467778354(+)	Splicing factor 3B subunit 2	Os02g0827300	NA
	TraesCS6D02G394000	chr6D:467780222-467781941(+)	Prefoldin chaperone subunit family protein	NA	NA
	TraesCS6D02G394100	chr6D:467797621-467802933(-)	NA	NA	NA
	TraesCS6D02G394200	chr6D:467808597-467808956(-)	Serine/threonine-protein kinase	NA	NA
	TraesCS6D02G394300	chr6D:467814079-467815722(-)	Disease resistance protein (NBS-LRR class) family	NA	NA
	TraesCS6D02G394400	chr6D:467828184-467833388(+)	NBS-LRR disease resistance protein-like protein	NA	NA
	TraesCS6D02G394500	chr6D:467836130-467850699(+)	Disease resistance protein RPM1	NA	NA
	TraesCS6D02G394600	chr6D:467856066-467860898(+)	Protein kinase family protein	Os02g0833000	AT1G17910
	TraesCS6D02G394700	chr6D:467907868-467913971(+)	Disease resistance protein RPM1	NA	NA
	TraesCS6D02G394800	chr6D:467914131-467919741(-)	Testis-expressed sequence 2 protein	Os02g0827500	AT1G17820
	TraesCS6D02G394900	chr6D:467927474-467930368(+)	NA	NA	NA
	TraesCS6D02G395000	chr6D:467931726-467934379(-)	Plant/F9H3-4 protein	Os02g0827400	AT1G17830
	TraesCS6D02G395100	chr6D:467986993-467989757(+)	rRNA-processing protein UTP23 like	Os02g0468200	NA
	TraesCS6D02G395200	chr6D:467992901-467996688(-)	Ankyrin repeat protein family-like protein	NA	NA
	TraesCS6D02G395300	chr6D:468013936-468017119(-)	Ankyrin repeat protein family-like protein	NA	NA
	TraesCS6D02G395400	chr6D:468056247-468060799(-)	Receptor-like protein kinase	Os02g0833000	AT1G17910
	TraesCS6D02G395500	chr6D:468087600-468092216(-)	Ankyrin repeat protein family-like protein	NA	NA
	TraesCS6D02G395600	chr6D:468095605-468100014(-)	Protein kinase	Os02g0833000	AT1G17910
	TraesCS6D02G395700	chr6D:468146021-468153256(-)	Receptor-like protein kinase	Os02g0833000	AT1G17910
	TraesCS6D02G395800	chr6D:468167740-468171326(-)	Receptor-like protein kinase	NA	NA
	TraesCS6D02G395900	chr6D:468180987-468185160(-)	Protein kinase family protein	Os02g0833000	AT1G17910
	TraesCS6D02G396000	chr6D:468251972-468254368(-)	Disease resistance protein (NBS-LRR class) family	NA	NA
	TraesCS6D02G396100	chr6D:468654503-468657803(-)	NA	NA	NA
	TraesCS6D02G396200	chr6D:468689878-468690595(+)	tRNA-dihydrouridine(47) synthase [NAD(P)(+)]	NA	NA
	TraesCS6D02G396300	chr6D:468809424-468811981(-)	E3 ubiquitin-protein ligase	Os02g0828200	AT3G19990
	TraesCS6D02G396400	chr6D:468833593-468836613(+)	Endosomal targeting BRO1-like domain-containing protein	Os02g0828100	AT1G17940
	TraesCS6D02G396500	chr6D:468839593-468844556(+)	WRKY transcription factor-like protein	NA	NA
	TraesCS6D02G396600	chr6D:468871948-468876139(+)	NBS-LRR disease resistance protein-like protein	NA	NA
	TraesCS6D02G396700	chr6D:468910372-468914734(+)	Disease resistance protein (NBS-LRR class) family	NA	NA
	TraesCS6D02G396800	chr6D:469050560-469054768(+)	Disease resistance protein (NBS-LRR class) family	NA	NA
	TraesCS6D02G396900	chr6D:469066671-469070557(+)	NA	Os02g0833000	AT1G17910
	TraesCS6D02G397000	chr6D:469205255-469207520(+)	Transcription factor, putative	Os02g0828566	NA
	TraesCS6D02G397100	chr6D:469236211-469236498(+)	B3 domain-containing protein	NA	NA
	TraesCS6D02G397200	chr6D:469246563-469250473(+)	Peroxidase	Os02g0553200	AT1G77490
	TraesCS6D02G397400	chr6D:469310371-469311897(+)	Anthocyanin 3'-O-beta-glucosyltransferase	NA	NA
	TraesCS6D02G397500	chr6D:469344083-469344725(-)	calcium-dependent protein kinase 18	NA	NA
	TraesCS6D02G397600	chr6D:469371105-469375092(-)	F-box family protein	NA	NA
	TraesCS6D02G397700	chr6D:469372538-469373038(+)	Protein kinase superfamily protein	NA	NA
	TraesCS6D02G397800	chr6D:469391149-469392725(-)	NA	NA	NA
	TraesCS6D02G397900	chr6D:469394238-469397320(-)	4-hydroxybenzoate octaprenyltransferase	Os08g0389300	AT4G23660
	TraesCS6D02G398000	chr6D:469488833-469521727(-)	LisH and RanBPM domains containing protein	Os01g0775600	AT1G06060
	TraesCS6D02G398100	chr6D:469534425-469538384(-)	Replication protein A 32 kDa subunit	Os02g0829100	NA
	TraesCS6D02G398200	chr6D:469552737-469553550(+)	Ripening-related protein	Os02g0637000	NA
	TraesCS6D02G398300	chr6D:469574103-469579729(-)	C2 calcium/lipid-binding domain, CaLB	Os02g0829200	AT3G19830
	TraesCS6D02G398400	chr6D:469583792-469585562(+)	TCP-1/cpn60 chaperonin family protein	NA	NA
	TraesCS6D02G398500	chr6D:469615841-469620058(+)	F-box protein	NA	NA
	TraesCS6D02G398600	chr6D:469751149-469752009(-)	Disease resistance protein RPM1	NA	NA
	TraesCS6D02G398700	chr6D:469784939-469792305(-)	Disease resistance protein RPM1	NA	NA
	TraesCS6D02G398800	chr6D:469799822-469804436(+)	Rp1-like protein	Os01g0782100	NA
	TraesCS6D02G398900	chr6D:469811728-469813092(-)	Disease resistance protein (NBS-LRR class) family	NA	NA
	TraesCS6D02G399000	chr6D:469828078-469832551(-)	NA	NA	NA
	TraesCS6D02G399100	chr6D:469911882-469920136(+)	Disease resistance protein RPM1	NA	NA
	TraesCS6D02G399200	chr6D:469929933-469931507(-)	Disease resistance protein RPM1	NA	NA
	TraesCS6D02G399300	chr6D:469932746-469933477(-)	Disease resistance protein RPM1	NA	NA
	TraesCS6D02G399400	chr6D:469936714-469940282(-)	Disease resistance protein RPM1	NA	NA
	TraesCS6D02G399500	chr6D:469962716-469969487(-)	NBS-LRR-like resistance protein	NA	NA
	TraesCS6D02G399600	chr6D:469984909-469990936(-)	NA	NA	NA
	TraesCS6D02G399700	chr6D:469990949-469991140(-)	Disease resistance protein RPM1	NA	NA
	TraesCS6D02G399800	chr6D:470040421-470045031(+)	AP-5 complex subunit beta-1	Os02g0829400	AT3G19870
	TraesCS6D02G399900	chr6D:470046212-470047105(+)	transmembrane protein, putative (DUF594)	Os10g0144000	NA
	TraesCS6D02G400000	chr6D:470047792-470048430(+)	transmembrane protein, putative (DUF594)	NA	NA
	TraesCS6D02G400100	chr6D:470065500-470066818(-)	Cortactin-binding protein 2	NA	NA
	TraesCS6D02G400200	chr6D:470082637-470087763(+)	receptor kinase 2	Os02g0833000	NA
	TraesCS6D02G400300	chr6D:470096737-470098901(+)	NBS-LRR disease resistance protein	NA	NA
	TraesCS6D02G400400	chr6D:470098964-470100529(+)	NBS-LRR-like resistance protein	NA	NA
	TraesCS6D02G400500	chr6D:470102303-470104546(-)	transmembrane protein, putative (DUF594)	Os10g0144000	NA
	TraesCS6D02G400600	chr6D:470288883-470290972(+)	Transmembrane protein, putative (DUF247)	NA	NA
	TraesCS6D02G400700	chr6D:470293677-470298475(-)	NA	NA	NA
	TraesCS6D02G400800	chr6D:470319426-470325266(-)	U-box domain-containing protein 62	Os02g0829600	AT3G19895
	TraesCS6D02G400900	chr6D:470352027-470352737(-)	Mediator of RNA polymerase II transcription subunit 32	NA	NA
	TraesCS6D02G401000	chr6D:470543537-470544394(+)	60 kDa chaperonin	NA	NA
	TraesCS6D02G401100	chr6D:470573067-470574835(+)	Pentatricopeptide repeat-containing protein	Os02g0829800	NA
	TraesCS6D02G401200	chr6D:470602034-470603902(-)	Protease	NA	AT3G19900
	TraesCS6D02G401300	chr6D:470613593-470614486(-)	Plant invertase/pectin methylesterase inhibitor superfamily protein	NA	NA
	TraesCS6D02G401400	chr6D:470618108-470618692(-)	Plant invertase/pectin methylesterase inhibitor	NA	NA
	TraesCS6D02G401500	chr6D:470625324-470630683(-)	Mitochondrial intermediate peptidase	Os02g0830100	AT5G65620
	TraesCS6D02G401600	chr6D:470632933-470634909(-)	Response regulator	Os02g0830200	NA
	TraesCS6D02G401700	chr6D:470636964-470644381(-)	integral membrane metal-binding family protein (DUF2296)	Os02g0830300	NA
	TraesCS6D02G401800	chr6D:470663832-470666254(+)	Cell surface glycoprotein CD200 receptor 4	NA	NA
	TraesCS6D02G401900	chr6D:470680308-470685060(+)	ATP-dependent RNA helicase	Os01g0639100	AT3G19760
	TraesCS6D02G402000	chr6D:470689986-470691304(+)	integral membrane metal-binding family protein (DUF2296)	Os02g0830300	NA
	TraesCS6D02G402100	chr6D:470754620-470754898(+)	protein kinase family protein	NA	NA
	TraesCS6D02G402200	chr6D:470855624-470856252(+)	zinc finger (C3HC4-type RING finger) family protein	NA	NA
	TraesCS6D02G402300	chr6D:470867897-470868477(-)	Invertase inhibitor	NA	NA
	TraesCS6D02G402400	chr6D:470884426-470886325(-)	RING/U-box superfamily protein	NA	NA
	TraesCS6D02G402500	chr6D:470902211-470908141(-)	70 kDa heat shock protein	Os05g0460000	AT5G02500
	TraesCS6D02G402600	chr6D:470961168-470967413(-)	Receptor-like kinase	Os02g0830700	NA
	TraesCS6D02G402700	chr6D:470990689-471005705(+)	Protein furry homolog-like protein	Os02g0830900	AT5G15680
	TraesCS6D02G402800	chr6D:471015092-471018725(+)	Zinc finger CCCH domain-containing protein 19	Os02g0831100	NA
	TraesCS6D02G402900	chr6D:471069789-471071667(-)	myb domain protein 3r-3	NA	NA
	TraesCS6D02G403000	chr6D:471113410-471115016(-)	CsAtPR5	NA	NA
	TraesCS6D02G403100	chr6D:471151754-471153489(+)	Eukaryotic aspartyl protease family protein, putative	NA	NA
	TraesCS6D02G403200	chr6D:471248778-471252905(+)	Receptor protein kinase, putative	Os02g0833000	NA
	TraesCS6D02G403300	chr6D:471274832-471275839(+)	CsAtPR5, putative, expressed	NA	NA
	TraesCS6D02G403400	chr6D:471566937-471569136(-)	NA	NA	NA
	TraesCS6D02G403500	chr6D:471731587-471731817(+)	DNA-directed RNA polymerase subunit beta	NA	NA
	TraesCS6D02G403600	chr6D:471818487-471820021(-)	tRNA N6-adenosine threonylcarbamoyltransferase	Os02g0831400	NA
	TraesCS6D02G403700	chr6D:471906791-471909749(-)	Inner capsid protein VP2	Os02g0831400	NA
	TraesCS6D02G403800	chr6D:471917727-471921914(+)	Sucrose synthase	Os02g0831500	AT5G37180
	TraesCS6D02G403900	chr6D:471921849-471928859(-)	Protein argonaute	Os02g0831600	AT1G48410
	TraesCS6D02G404000	chr6D:472012155-472012418(+)	Ribosomal protein S12 methylthiotransferase RimO	NA	NA
	TraesCS6D02G404100	chr6D:472131313-472136328(-)	disease resistance protein (TIR-NBS-LRR class)	NA	NA
	TraesCS6D02G404200	chr6D:472194152-472198769(-)	ATP-dependent Clp protease ATP-binding subunit ClpX	NA	NA
	TraesCS6D02G404300	chr6D:472226397-472238279(-)	Disease resistance protein RPM1	NA	NA
	TraesCS6D02G404400	chr6D:472301354-472303386(+)	Auxin Efflux Carrier family protein	NA	AT2G17500
	TraesCS6D02G404500	chr6D:472303284-472306511(-)	Homoserine kinase	Os02g0831800	AT2G17265
	TraesCS6D02G404600	chr6D:472305185-472308059(+)	Phospholipase A2	Os02g0831700	NA
	TraesCS6D02G404700	chr6D:472308319-472309182(-)	beta glucosidase 43	NA	NA
	TraesCS6D02G404800	chr6D:472356725-472359218(-)	Calcium-dependent protein kinase	Os02g0832000	AT2G17290
	TraesCS6D02G404900	chr6D:472423285-472430294(-)	Protein SAWADEE HOMEODOMAIN-like protein 2	NA	NA
	TraesCS6D02G405000	chr6D:472496828-472502428(-)	Protein SAWADEE HOMEODOMAIN-like protein 2	NA	NA
	TraesCS6D02G405100	chr6D:472511684-472512775(+)	Extracellular matrix-binding protein ebh	NA	NA
	TraesCS6D02G405200	chr6D:472525036-472527528(+)	Monosaccharide-sensing protein 2	Os02g0832100	AT1G20840
	TraesCS6D02G405300	chr6D:472568340-472568969(-)	Ring finger protein	Os02g0832150	AT1G20823
[truncated: 28 more rows]
