# Supplementary material for: Genome-Wide Association Study Reveals the Genetic Basis of Five Quality Traits in Chinese Wheat
Source: Front Plant Sci. 2022 Mar 3;13:835306. doi: 10.3389/fpls.2022.835306 (PMC8928432; doi:10.3389/fpls.2022.835306)
Supplement: Supplementary Table 5 — Candidate genes specifically and highly expressed in grain at reproductive growth stages based on available transcriptome data. [file Table_5.XLSX]

## Sheet: Sheet1
Table S5 Candidate genes specifically and highly expressed in grain at reproductive growth stages based on available transcriptome data
Trait	QTL	Gene	Location	Description	Oryza sativa	Arabidopsis thaliana
PC	qPC1A	TraesCS1A02G165400	chr1A:298105708-298107333(-)	Aquaporin	Os10g0492600	AT1G73190
		TraesCS1A02G172600	chr1A:308569895-308571435(+)	Tetratricopeptide repeat (TPR)-like superfamily protein	Os10g0501900	NA
	qPC5A.3	TraesCS5A02G267700	chr5A:478861586-478865149(+)	plant/protein (Protein of unknown function, DUF538)	Os07g0119800	NA
		TraesCS5A02G267800	chr5A:478882356-478882772(+)	plant/protein (Protein of unknown function, DUF538)	Os07g0119800	NA
GC	qGC5A	TraesCS5A02G267700	chr5A:478861586-478865149(+)	plant/protein (Protein of unknown function, DUF538)	Os07g0119800	NA
		TraesCS5A02G267800	chr5A:478882356-478882772(+)	plant/protein (Protein of unknown function, DUF538)	Os07g0119800	NA
BV	qBV2D.2	TraesCS2D02G382300	chr2D:486331488-486333024(+)	Caleosin	Os04g0511200	AT2G33380
		TraesCS2D02G382400	chr2D:486390272-486392935(+)	Vacuolar-processing enzyme	Os04g0537900	AT1G62710
		TraesCS2D02G383400	chr2D:487932231-487934953(-)	Vacuolar-processing enzyme	Os04g0537900	AT1G62710
		TraesCS2D02G383500	chr2D:488055731-488059567(-)	Vacuolar-processing enzyme	Os04g0537900	AT1G62710
	qBV3D.2	TraesCS3D02G467300	chr3D:570280982-570282418(+)	Basic 7S globulin	Os01g0937100	NA
	qBV5D	TraesCS5D02G529200	chr5D:545943087-545944933(-)	Short-chain dehydrogenase/reductase family protein	Os03g0842900	AT4G10020
		TraesCS5D02G535400	chr5D:549323862-549325912(+)	Cytochrome P450	Os03g0850200	NA
	qBV6B.2	TraesCS6B02G383500	chr6B:658402976-658404180(+)	NA	NA	NA
		TraesCS6B02G383800	chr6B:658577562-658578499(-)	Dehydrin	NA	NA
	qBV6D	TraesCS6D02G332900	chr6D:435351033-435352218(+)	NA	NA	NA
		TraesCS6D02G340200	chr6D:439616425-439619143(+)	carboxyl-terminal peptidase, putative (DUF239)	Os02g0792500	NA
		TraesCS6D02G340500	chr6D:439659401-439662136(-)	carboxyl-terminal peptidase, putative (DUF239)	Os02g0792500	NA
HA	qHA2B.2	TraesCS2B02G136600	chr2B:103960587-103962716(+)	Cytochrome P450 family protein, expressed	Os07g0603700	NA
		TraesCS2B02G138100	chr2B:105373275-105374789(+)	Zinc finger CCCH domain-containing protein	Os07g0668600	NA
	qHA2D.1	TraesCS2D02G073900	chr2D:31513300-31517302(-)	1-deoxy-D-xylulose-5-phosphate synthase, Transketolase	Os04g0266900	AT2G45290
		TraesCS2D02G081700	chr2D:35081075-35081607(-)	Phosphoglycerate kinase	NA	NA
	qHA3D.2	TraesCS3D02G467300	chr3D:570280982-570282418(+)	Basic 7S globulin	Os01g0937100	NA
	qHA4B.3	TraesCS4B02G380000	chr4B:660596274-660599227(-)	Protein NRT1/ PTR FAMILY 5.1	NA	NA
		TraesCS4B02G381200	chr4B:660940620-660944513(+)	Divalent metal cation transporter MntH	Os03g0700800	NA
	qHA5D	TraesCS5D02G529200	chr5D:545943087-545944933(-)	Short-chain dehydrogenase/reductase family protein	Os03g0842900	AT4G10020
		TraesCS5D02G530100	chr5D:546566054-546567836(+)	Tropinone reductase-like protein	NA	AT2G29370
		TraesCS5D02G535400	chr5D:549323862-549325912(+)	Cytochrome P450	Os03g0850200	NA
	qHA6B.3	TraesCS6B02G383500	chr6B:658402976-658404180(+)	NA	NA	NA
		TraesCS6B02G383800	chr6B:658577562-658578499(-)	Dehydrin	NA	NA
		TraesCS6B02G390000	chr6B:664477679-664480588(+)	carboxyl-terminal peptidase, putative (DUF239)	Os02g0792500	NA
		TraesCS6B02G390300	chr6B:664522166-664524779(-)	carboxyl-terminal peptidase, putative (DUF239)	Os02g0792500	NA
	qHA6D.1	TraesCS6D02G332900	chr6D:435351033-435352218(+)	NA	NA	NA
		TraesCS6D02G340200	chr6D:439616425-439619143(+)	carboxyl-terminal peptidase, putative (DUF239)	Os02g0792500	NA
		TraesCS6D02G340500	chr6D:439659401-439662136(-)	carboxyl-terminal peptidase, putative (DUF239)	Os02g0792500	NA
	qHA7B.2	TraesCS7B02G347100	chr7B:603657172-603657958(+)	Heat-shock protein, putative	Os01g0184100	AT5G12020
		TraesCS7B02G361100	chr7B:623270162-623270879(-)	Protease inhibitor/seed storage/lipid transfer protein family protein	NA	NA
		TraesCS7B02G361200	chr7B:623372377-623372946(-)	Protease inhibitor/seed storage/lipid transfer protein family protein	NA	NA
		TraesCS7B02G361300	chr7B:623484730-623505389(-)	Protease inhibitor/seed storage/lipid transfer protein family protein	NA	NA
		TraesCS7B02G361400	chr7B:623504303-623522855(-)	NA	NA	NA
		TraesCS7B02G361700	chr7B:623933324-623933856(-)	Protease inhibitor/seed storage/lipid transfer protein family protein	NA	NA
SV	qSV2D.3	TraesCS2D02G382300	chr2D:486331488-486333024(+)	Caleosin	Os04g0511200	AT2G33380
		TraesCS2D02G382400	chr2D:486390272-486392935(+)	Vacuolar-processing enzyme	Os04g0537900	AT1G62710
		TraesCS2D02G383400	chr2D:487932231-487934953(-)	Vacuolar-processing enzyme	Os04g0537900	AT1G62710
		TraesCS2D02G383500	chr2D:488055731-488059567(-)	Vacuolar-processing enzyme	Os04g0537900	AT1G62710
	qSV4B	TraesCS4B02G380000	chr4B:660596274-660599227(-)	Protein NRT1/ PTR FAMILY 5.1	NA	NA
		TraesCS4B02G381200	chr4B:660940620-660944513(+)	Divalent metal cation transporter MntH	Os03g0700800	NA
	qSV6D.1	TraesCS6D02G332900	chr6D:435351033-435352218(+)	NA	NA	NA
		TraesCS6D02G340200	chr6D:439616425-439619143(+)	carboxyl-terminal peptidase, putative (DUF239)	Os02g0792500	NA
		TraesCS6D02G340500	chr6D:439659401-439662136(-)	carboxyl-terminal peptidase, putative (DUF239)	Os02g0792500	NA
	qSV6D.2	TraesCS6D02G402100	chr6D:470754620-470754898(+)	protein kinase family protein	NA	NA
		TraesCS6D02G404900	chr6D:472423285-472430294(-)	Protein SAWADEE HOMEODOMAIN-like protein 2	NA	NA
		TraesCS6D02G405000	chr6D:472496828-472502428(-)	Protein SAWADEE HOMEODOMAIN-like protein 2	NA	NA
